# Supplementary material
Source: PubMed Central journal article supplement (PMC6402987)

## VIII. Spectroscopic Data

### (*S*)-1-(1-phenylethyl)-1*H*-indole (3a)

<sup>1</sup>H NMR, 400 MHz, CDCl<sub>3</sub>

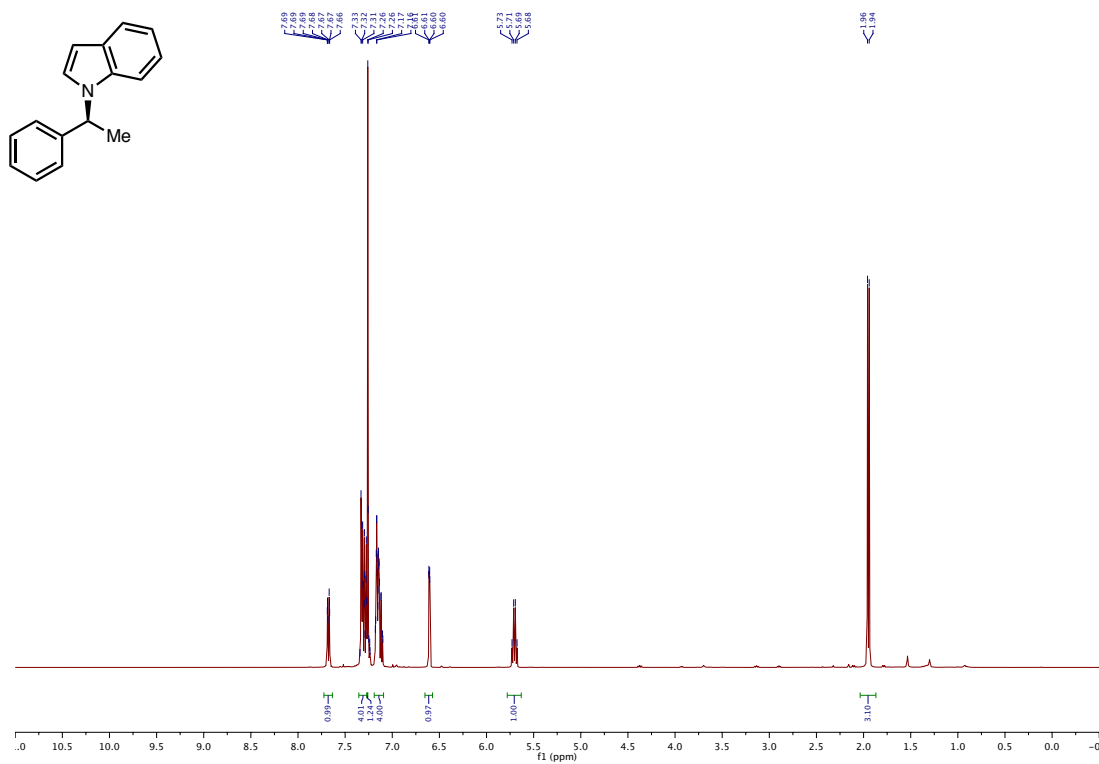

<sup>13</sup>C NMR, 101 MHz, CDCl<sub>3</sub>

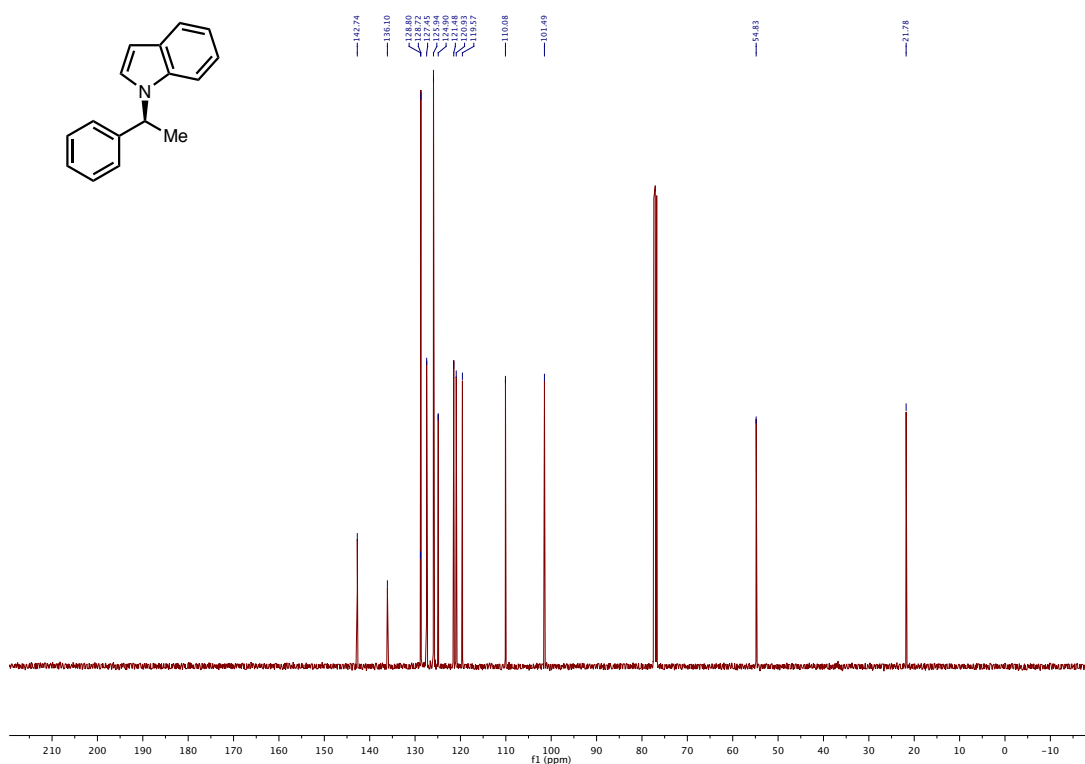

**(S)-1-(1-(*o*-tolyl)ethyl)-1*H*-indole (3b)**

<sup>1</sup>H NMR, 400 MHz, CDCl<sub>3</sub>

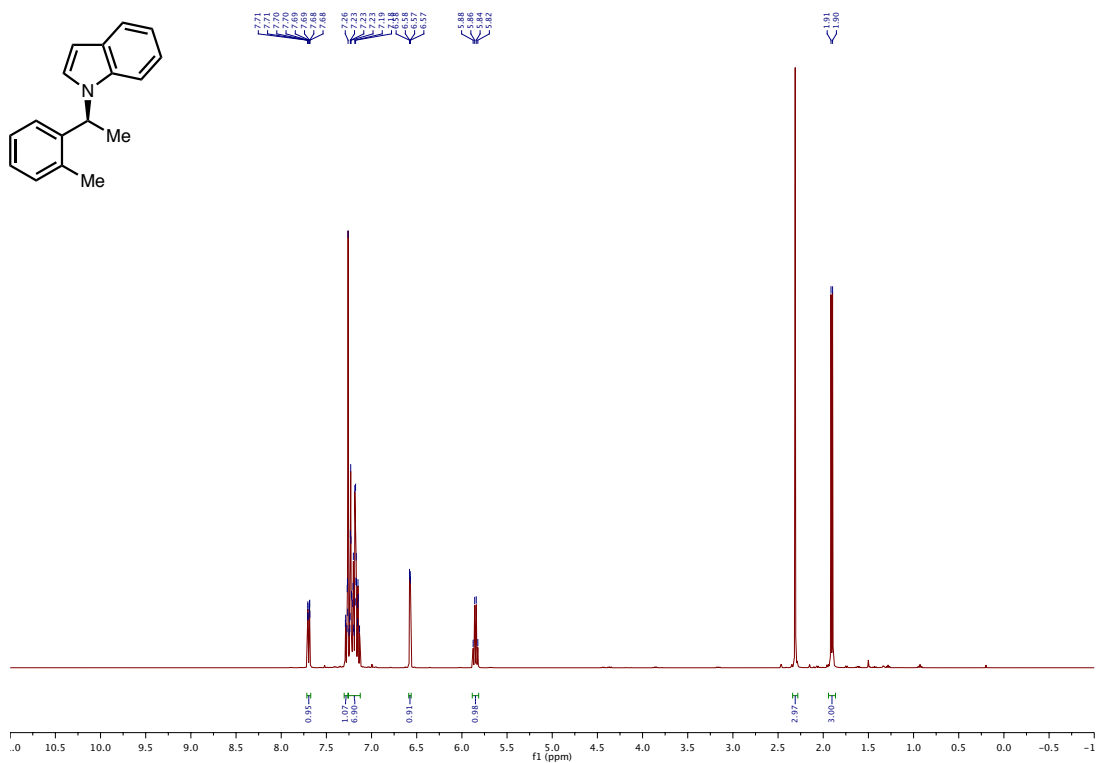

<sup>13</sup>C NMR, 101 MHz, CDCl<sub>3</sub>

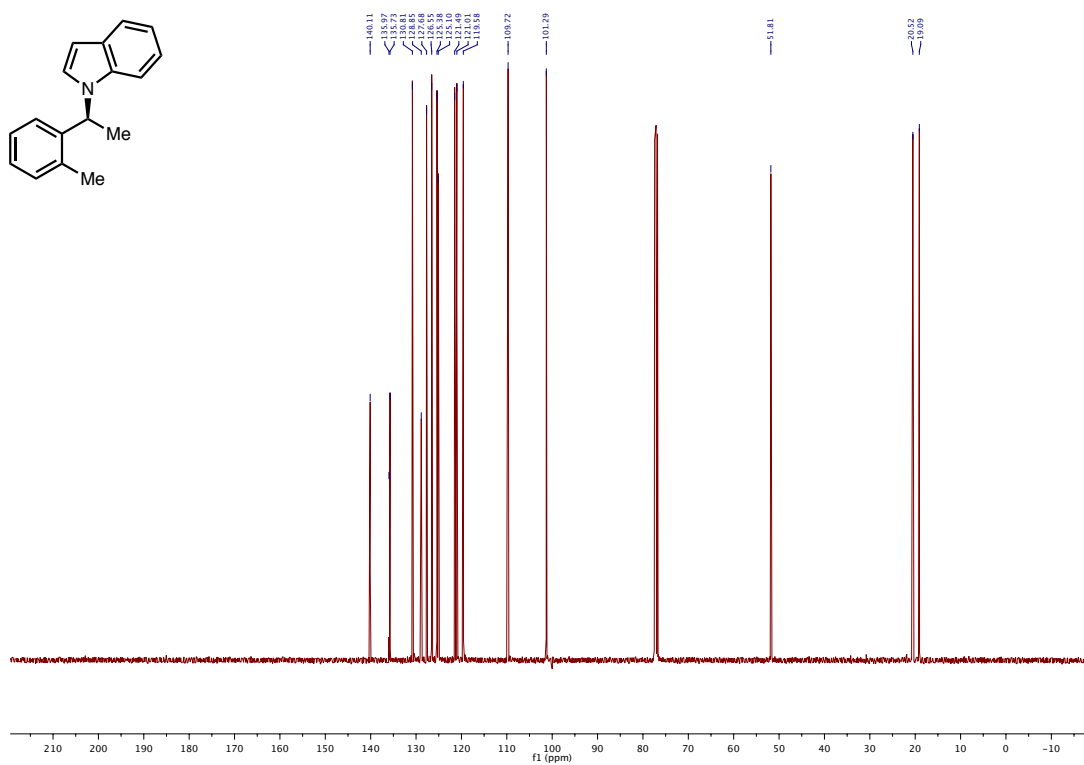

**(S)-1-(1-(3-methoxyphenyl)ethyl)-1H-indole (3c)**

$^1\text{H}$  NMR, 400 MHz,  $\text{CDCl}_3$

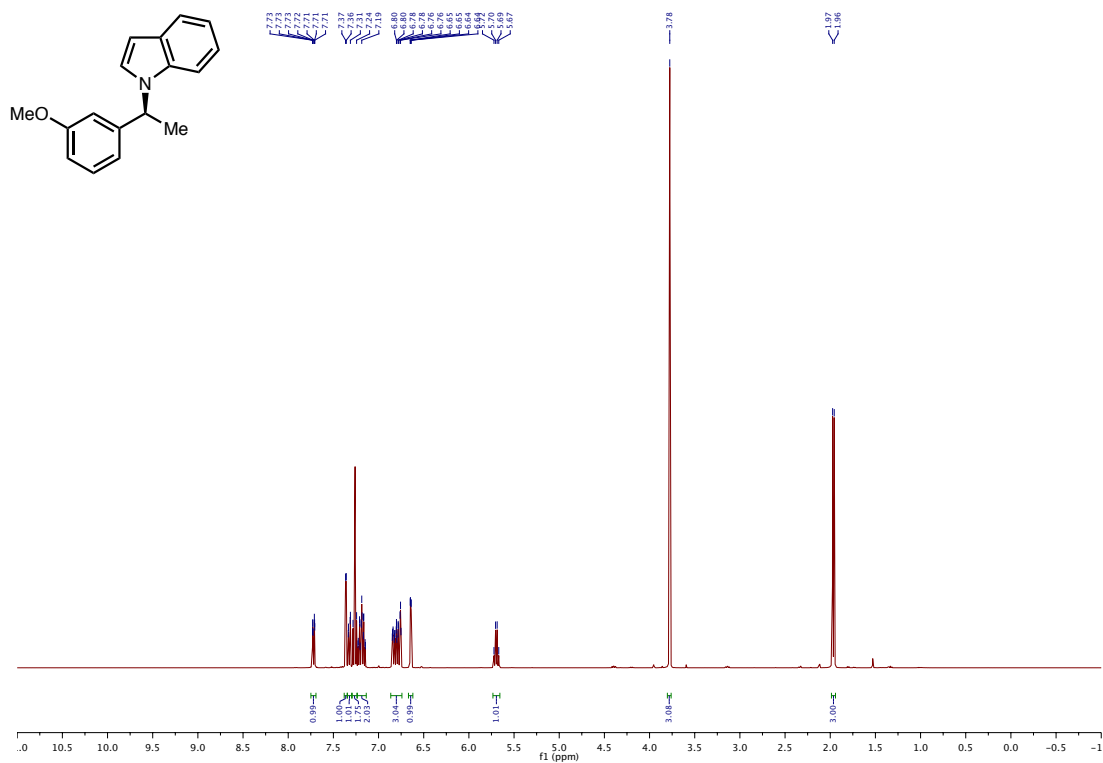

$^{13}\text{C}$  NMR, 101 MHz,  $\text{CDCl}_3$

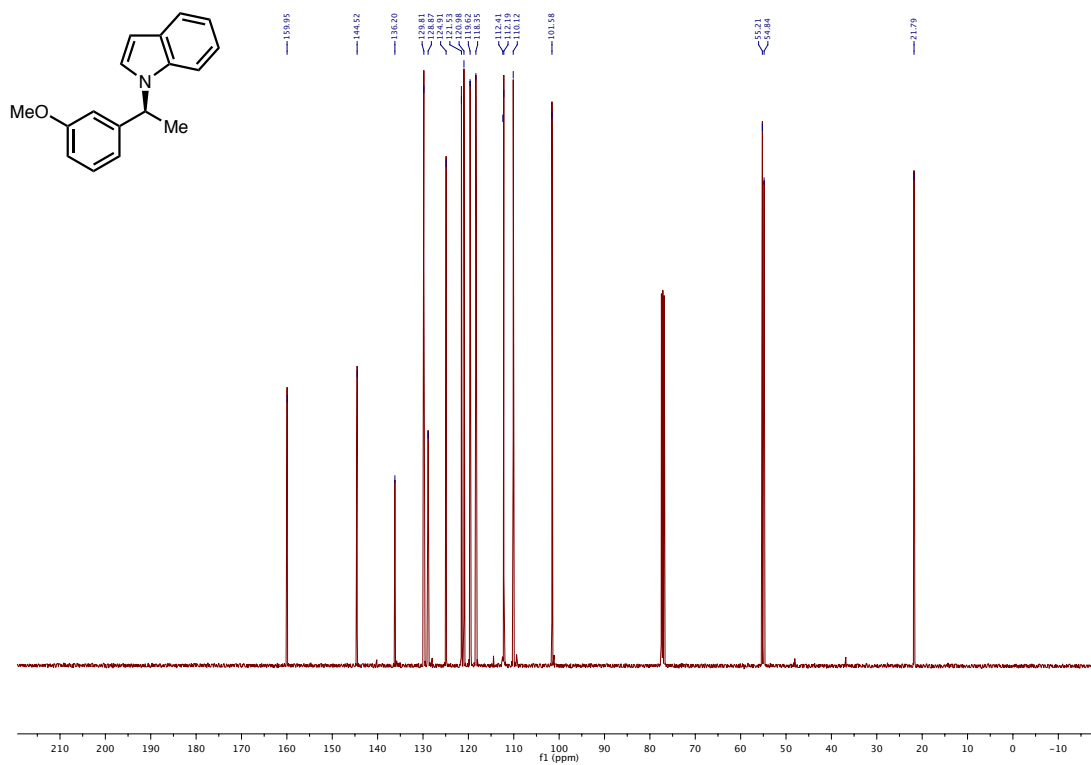

**(S)-1-(1-(4-fluorophenyl)ethyl)-1H-indole (3e)**

<sup>1</sup>H NMR, 400 MHz, CDCl<sub>3</sub>

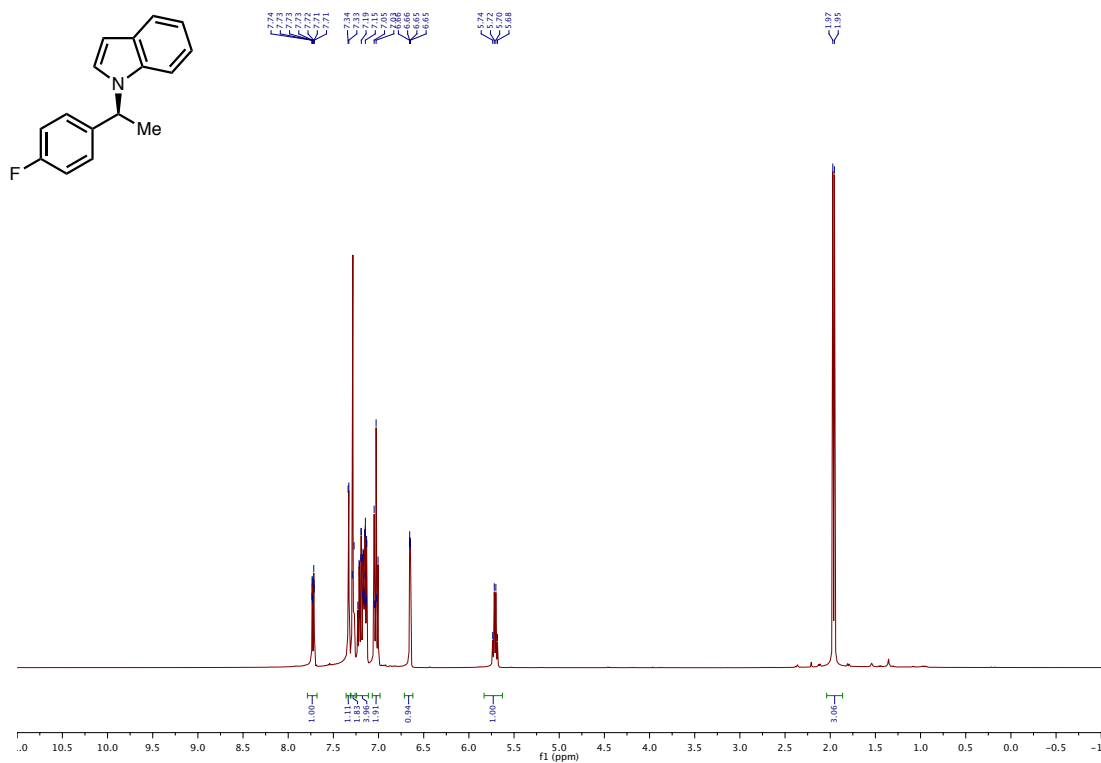

<sup>13</sup>C NMR, 101 MHz, CDCl<sub>3</sub>

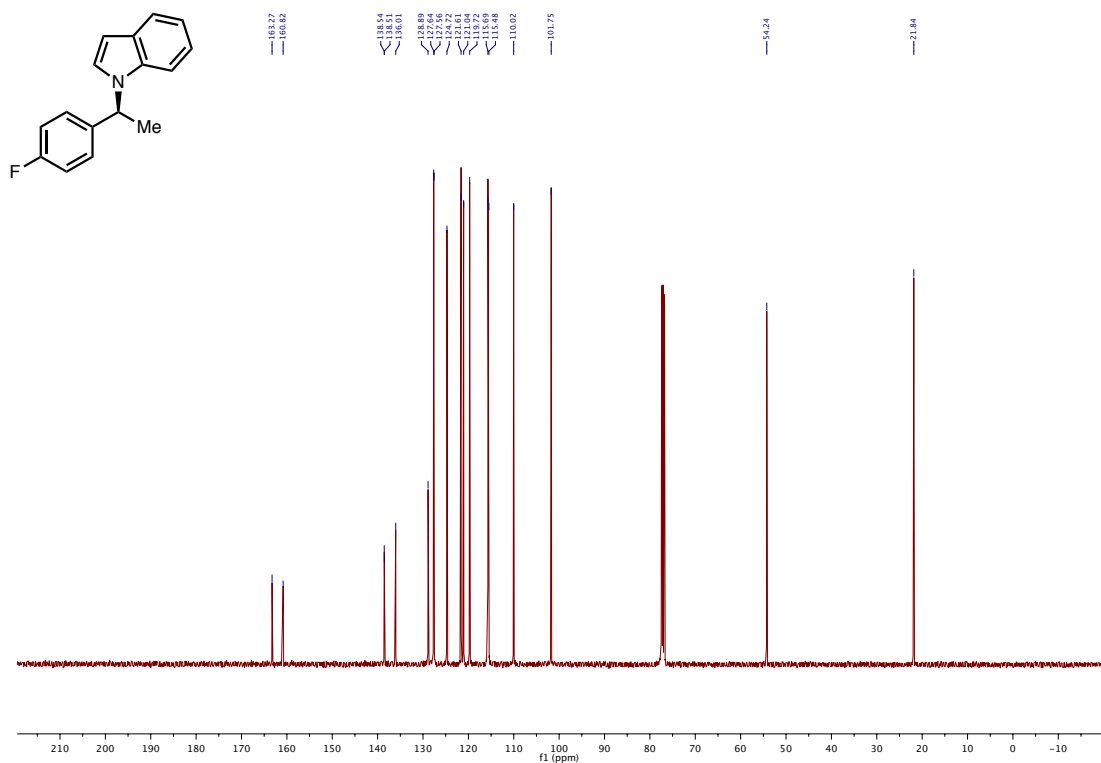

$^{19}\text{F}$  NMR, 376 MHz,  $\text{CDCl}_3$

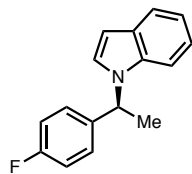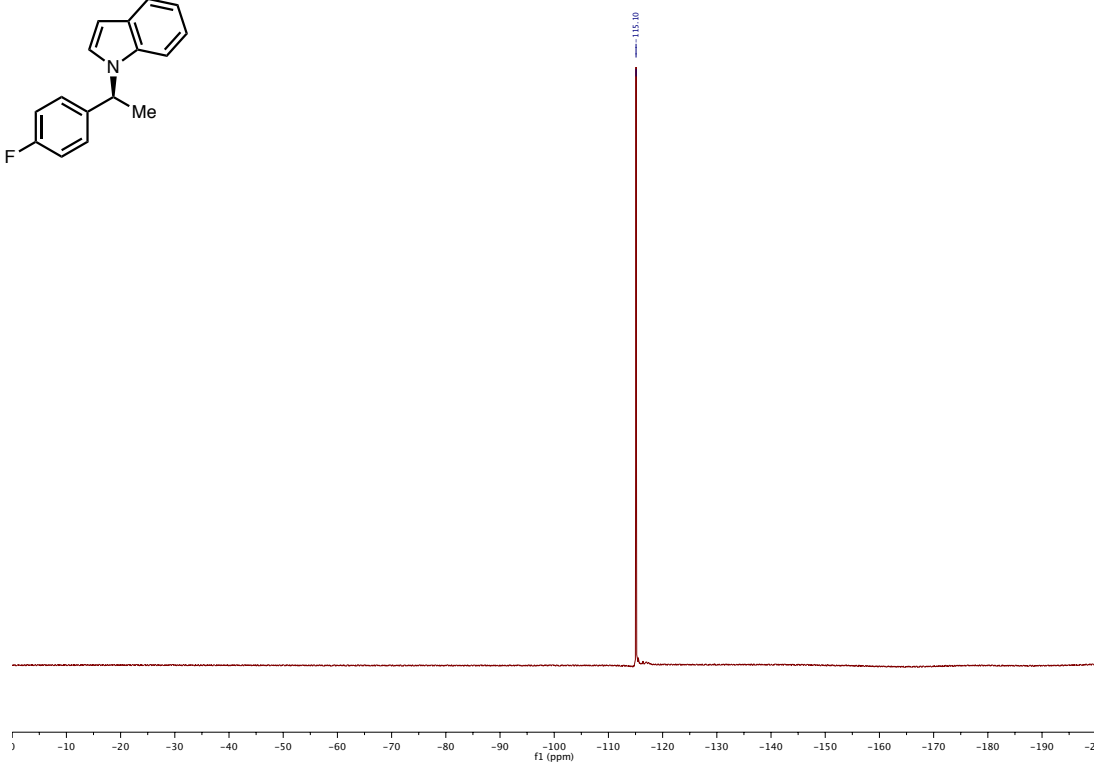

**(S)-5-(1-(1*H*-indol-1-yl)ethyl)-1-tosyl-1*H*-indole (3f)**

<sup>1</sup>H NMR, 400 MHz, CDCl<sub>3</sub>

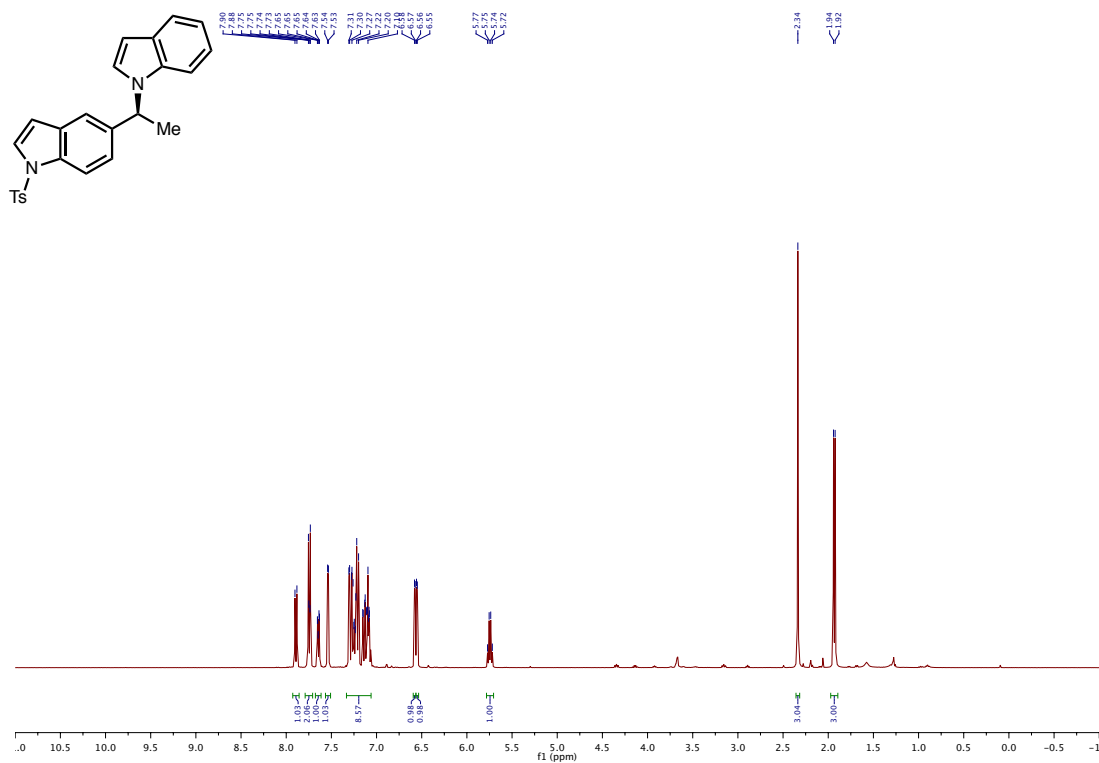

<sup>13</sup>C NMR, 101 MHz, CDCl<sub>3</sub>

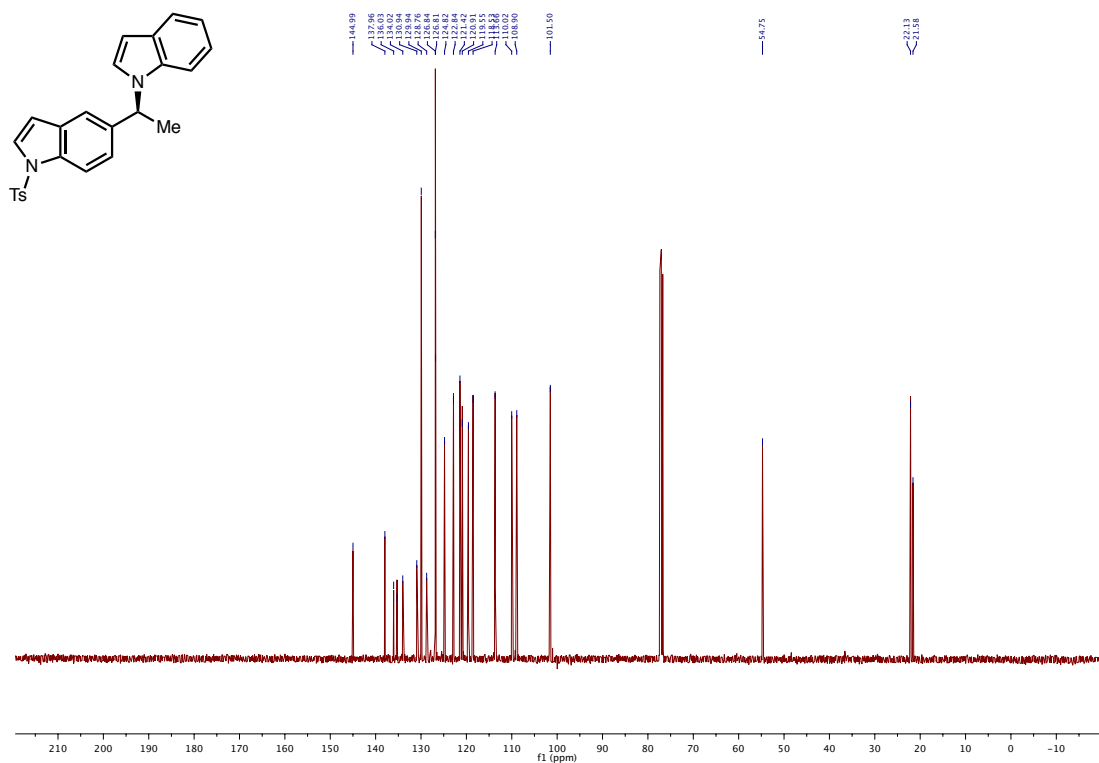



**(S)-N-(3-(1*H*-indol-1-yl)-3-phenylpropyl)-*N*-methylpivalamide (3h)**

<sup>1</sup>H NMR, 400 MHz, CDCl<sub>3</sub>

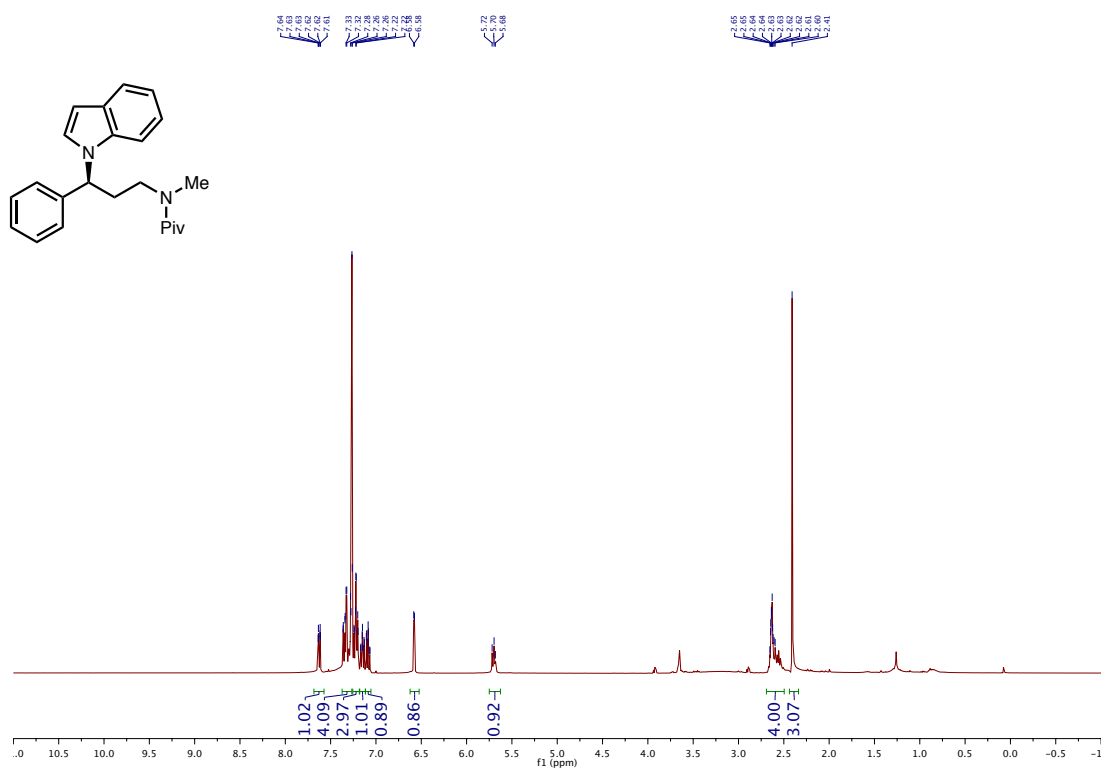

<sup>13</sup>C NMR, 101 MHz, CDCl<sub>3</sub>

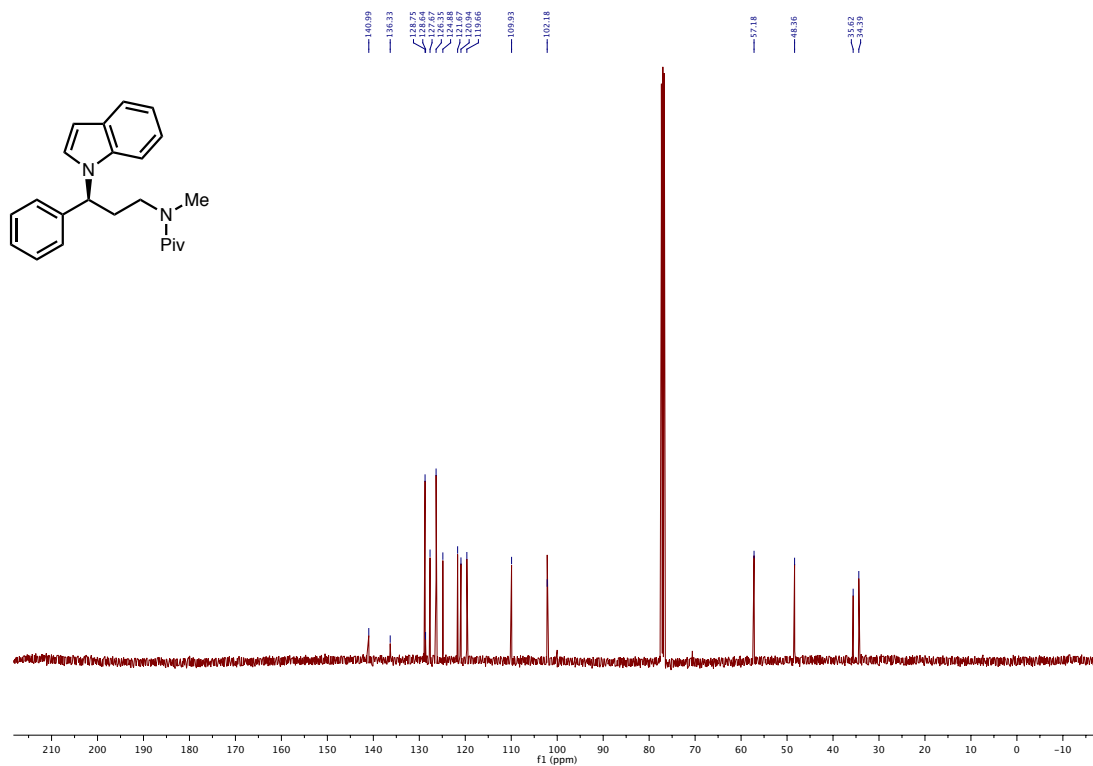



***N*-((2*S*,3*S*)-3-(1*H*-indol-1-yl)-2-methyl-3-phenylpropyl)-*N*,4-dimethylbenzenesulfonamide**

**(3i)**

<sup>1</sup>H NMR, 400 MHz, CDCl<sub>3</sub>

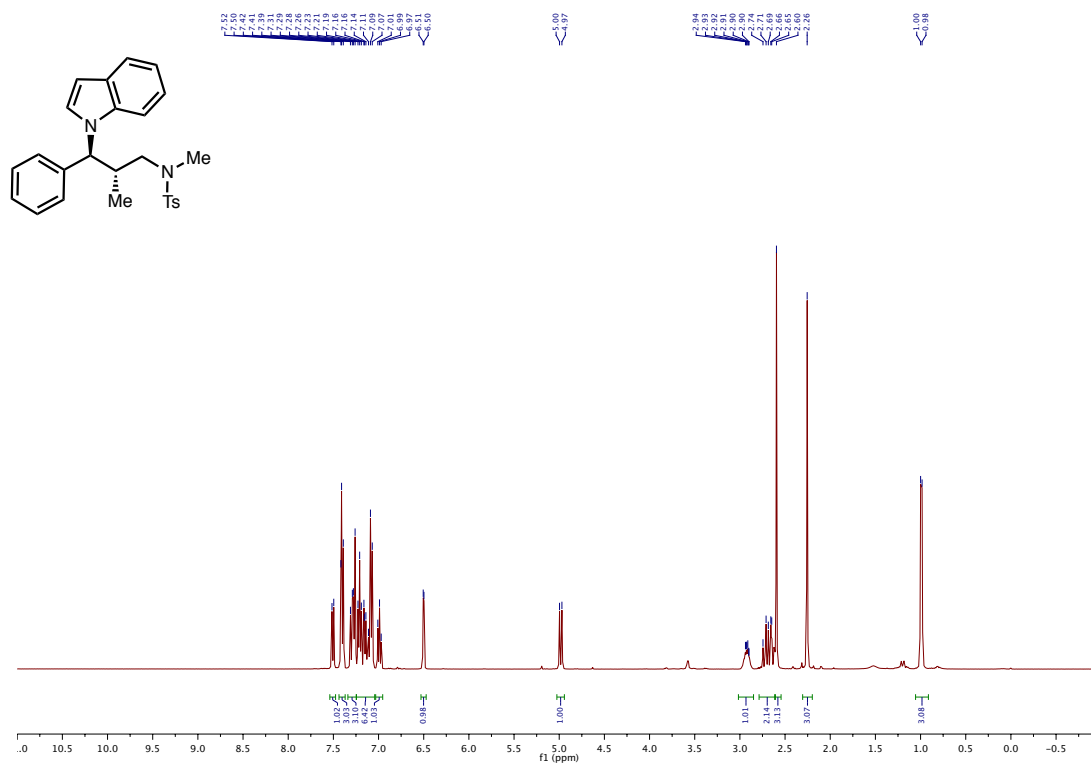

<sup>13</sup>C NMR, 101 MHz, CDCl<sub>3</sub>

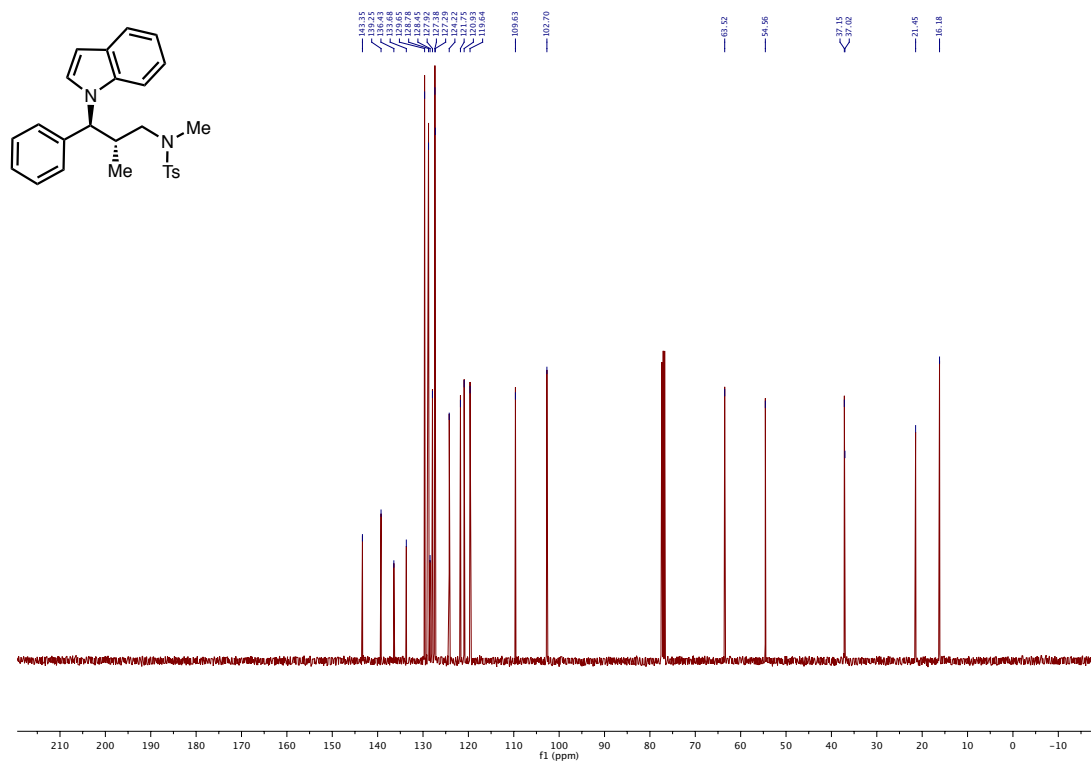

**(S)-N,N-diethyl-3-(1-(6-(trifluoromethyl)-1H-indol-1-yl)ethyl)benzamide (3j)**

<sup>1</sup>H NMR, 400 MHz, CDCl<sub>3</sub>

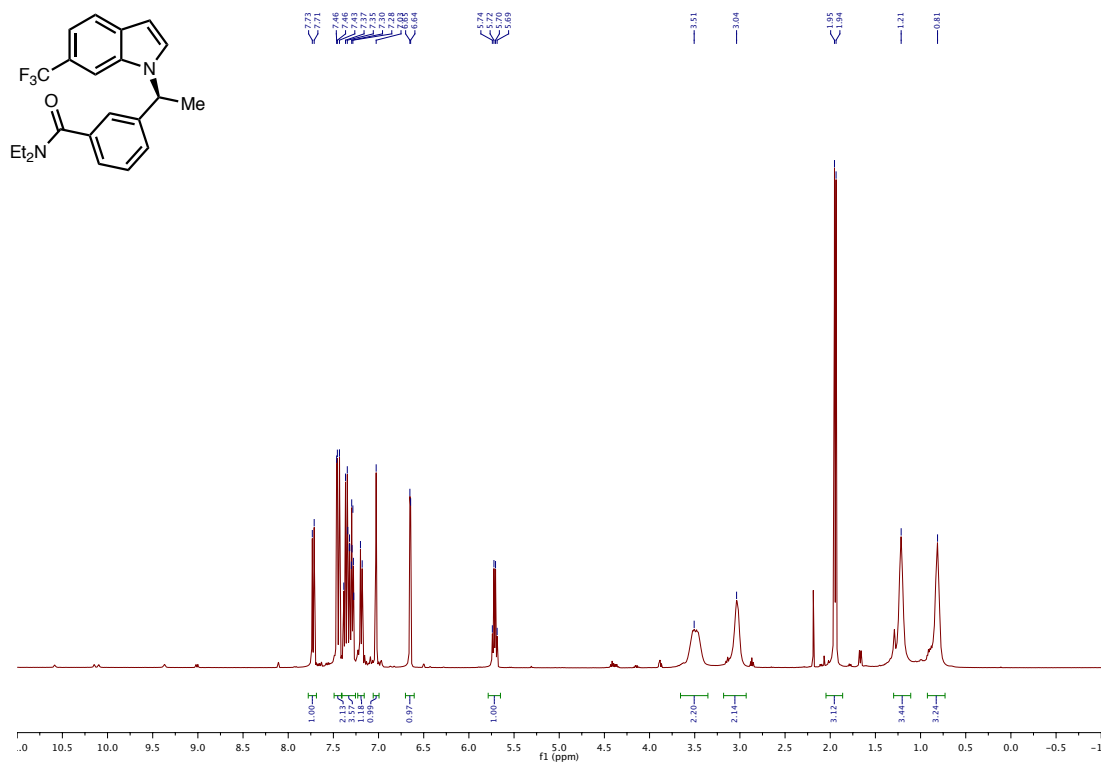

<sup>13</sup>C NMR, 101 MHz, CDCl<sub>3</sub>

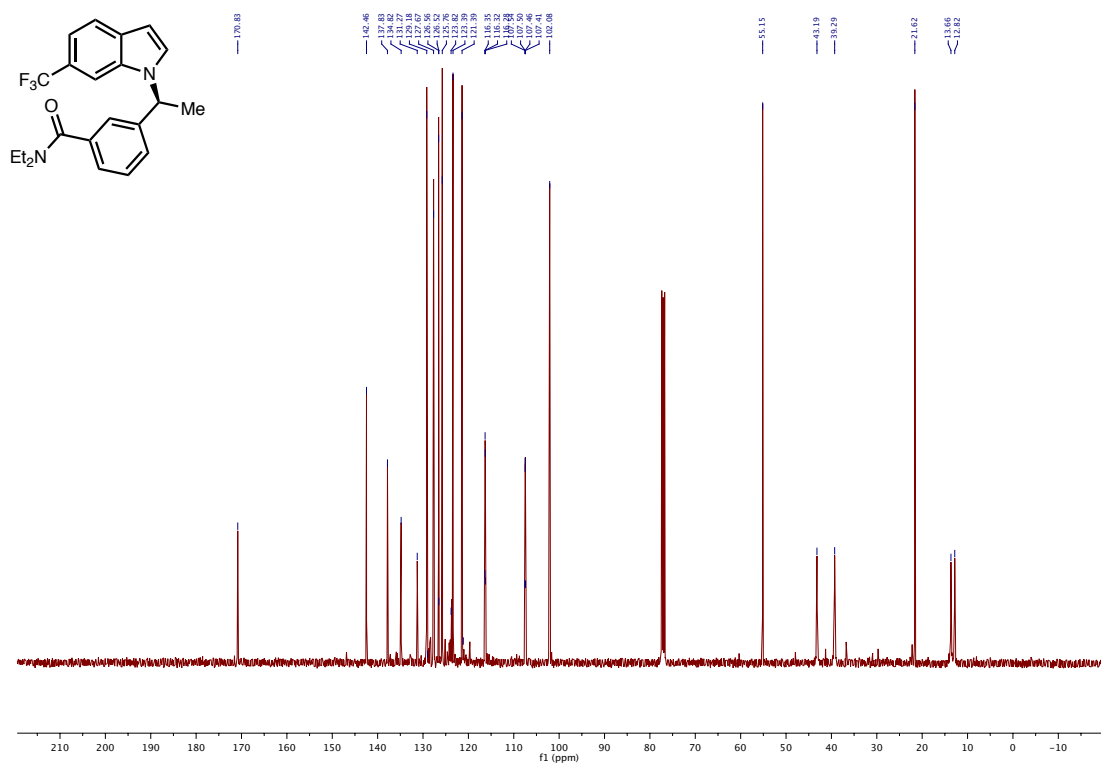

$^{19}\text{F}$  NMR, 376 MHz,  $\text{CDCl}_3$

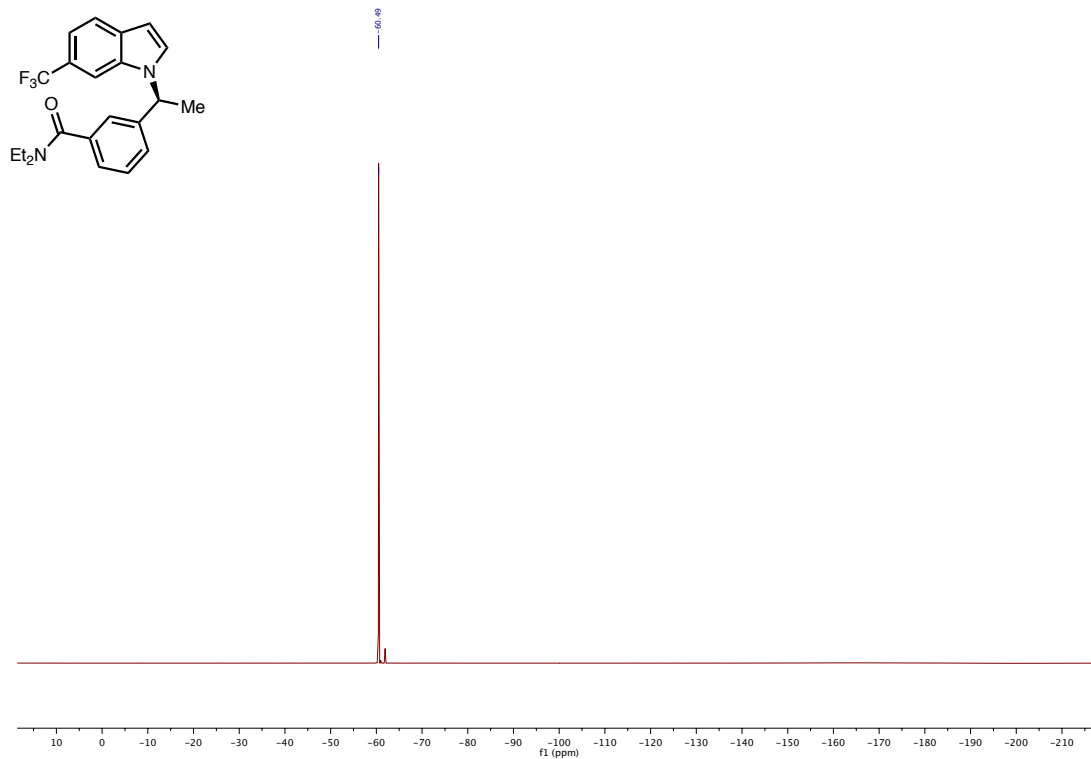

***tert*-butyl (*S*)-1-(1-(2-(difluoromethoxy)phenyl)ethyl)-1*H*-indole-4-carboxylate (3k)**

<sup>1</sup>H NMR, 400 MHz, CDCl<sub>3</sub>

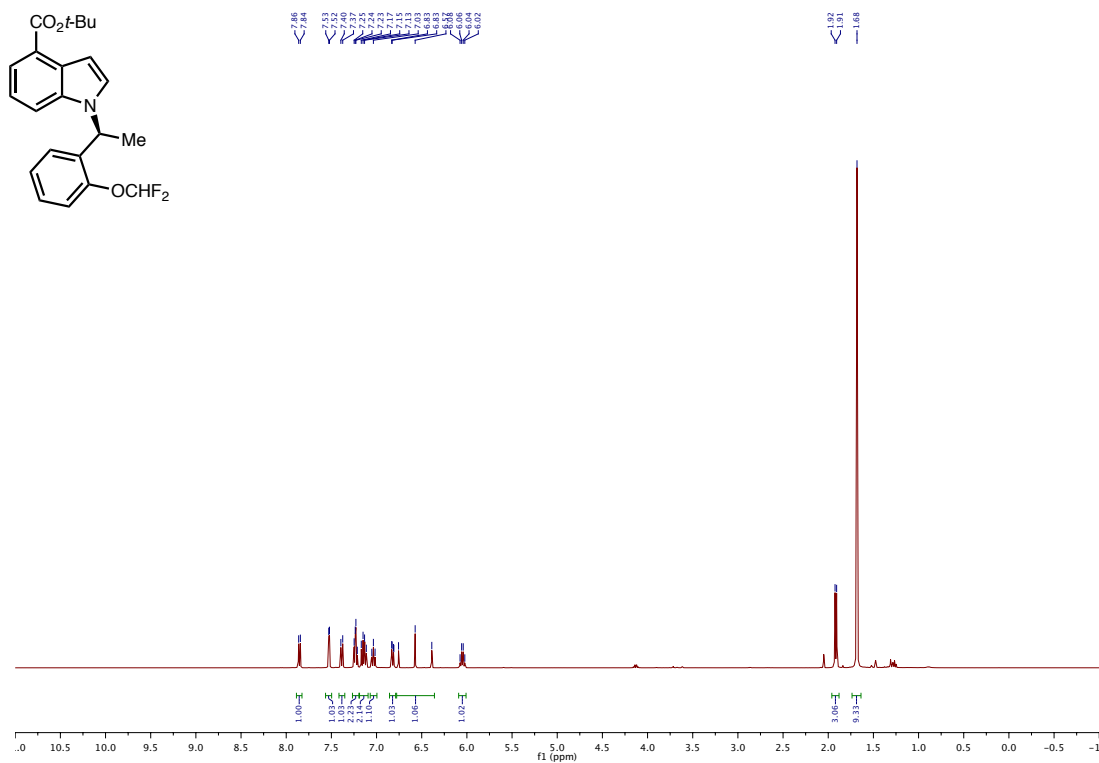

<sup>13</sup>C NMR, 101 MHz, CDCl<sub>3</sub>

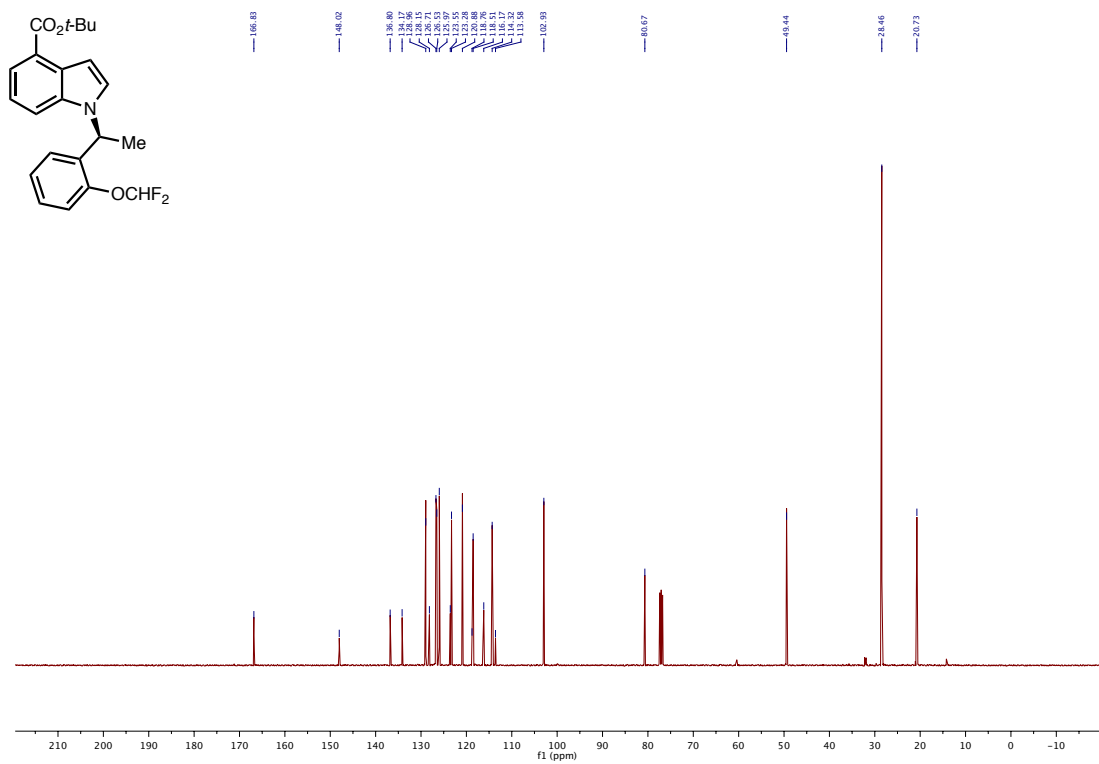







**(S)-3-(2-methoxyethyl)-1-(1-(4-(trifluoromethyl)phenyl)ethyl)-1H-indole (3n)**

<sup>1</sup>H NMR, 400 MHz, CDCl<sub>3</sub>

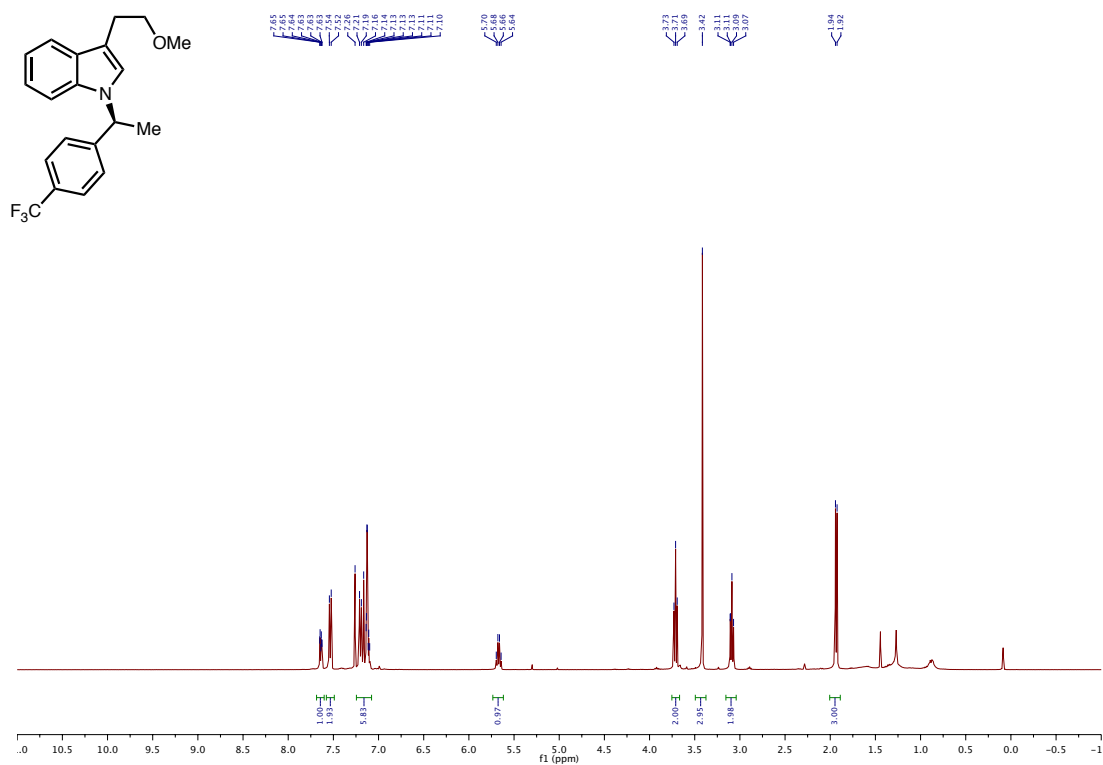

<sup>13</sup>C NMR, 101 MHz, CDCl<sub>3</sub>

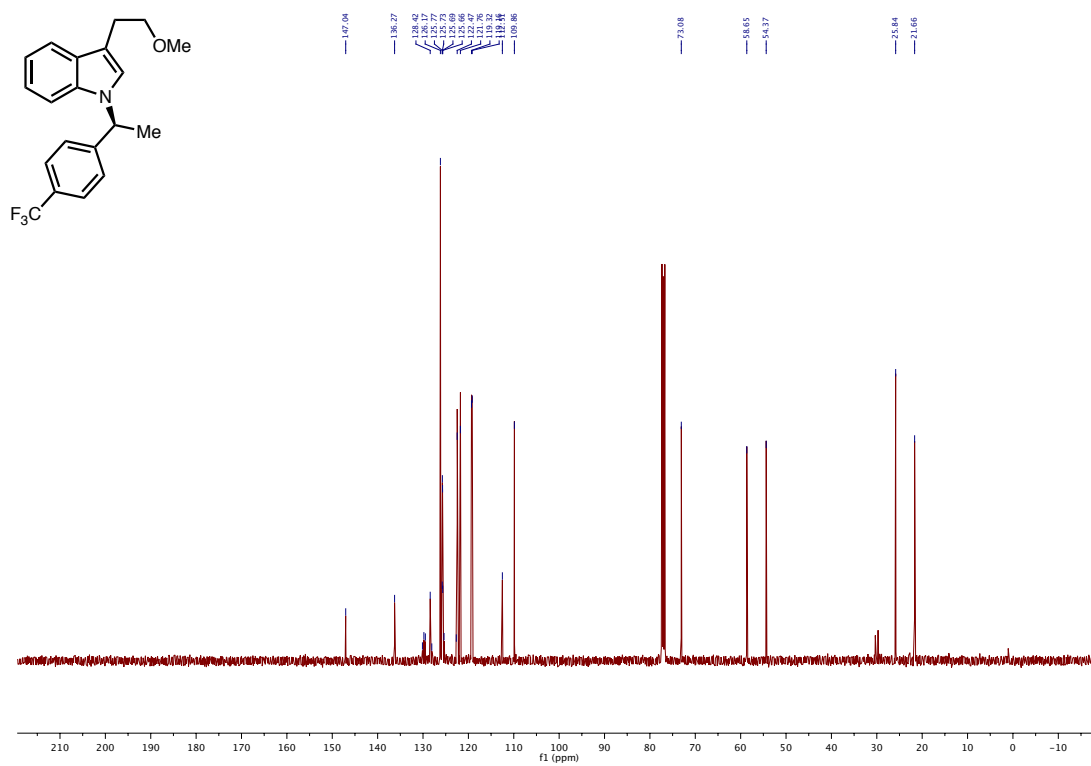



$^{19}\text{F}$  NMR, 376 MHz,  $\text{CDCl}_3$

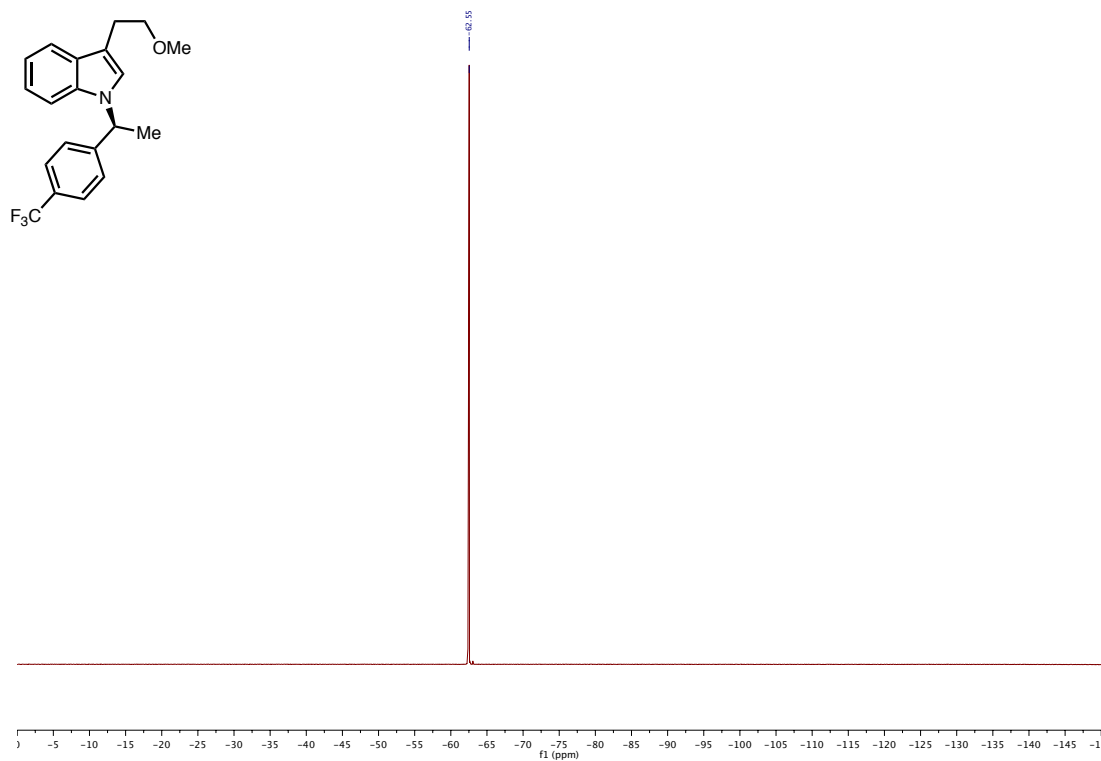

# 1-(3-(benzo[d][1,3]dioxol-5-yl)propyl)-1H-indole (3o)

$^1\text{H}$  NMR, 400 MHz,  $\text{CDCl}_3$

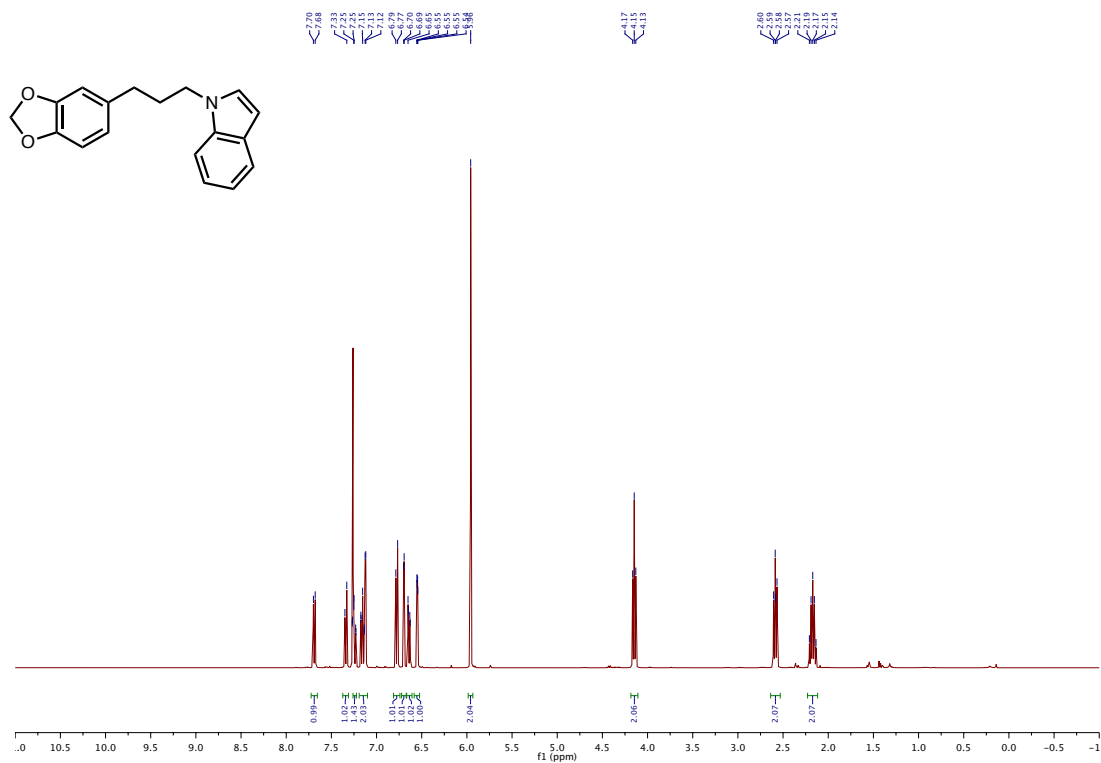

$^{13}\text{C}$  NMR, 101 MHz,  $\text{CDCl}_3$

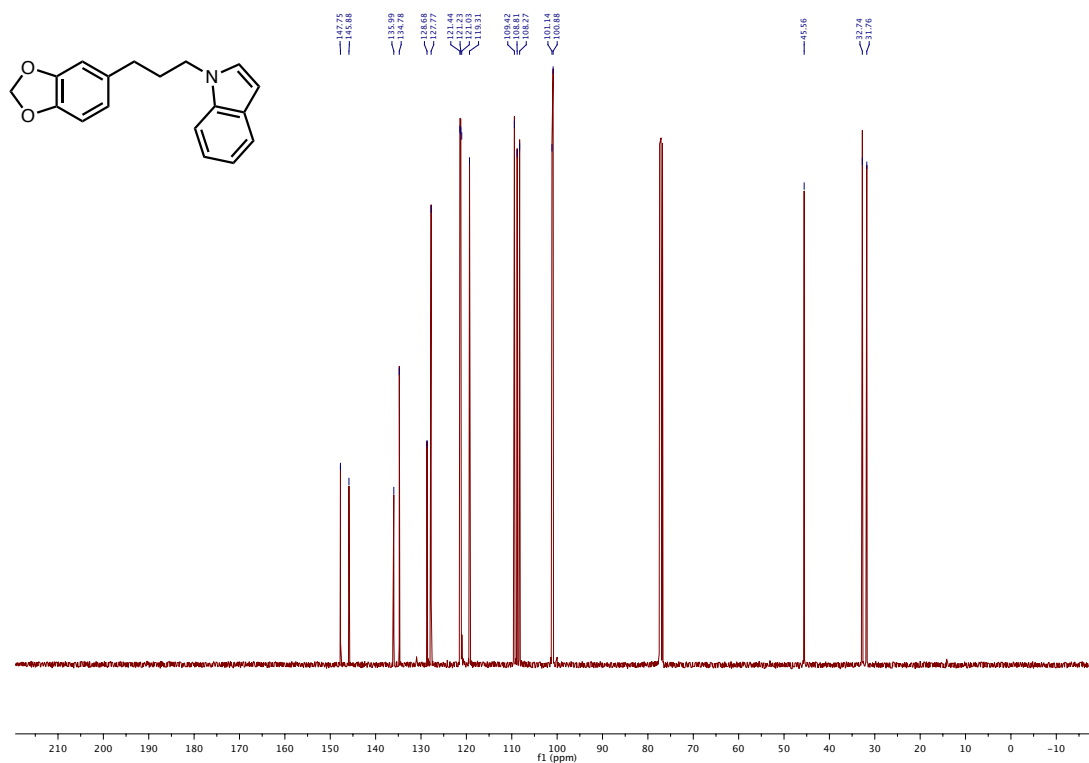

### 6-methyl-4-(4-(4-methyl-1H-indol-1-yl)butoxy)-2-(trifluoromethyl)quinolone (3p)

<sup>1</sup>H NMR, 400 MHz, CDCl<sub>3</sub>

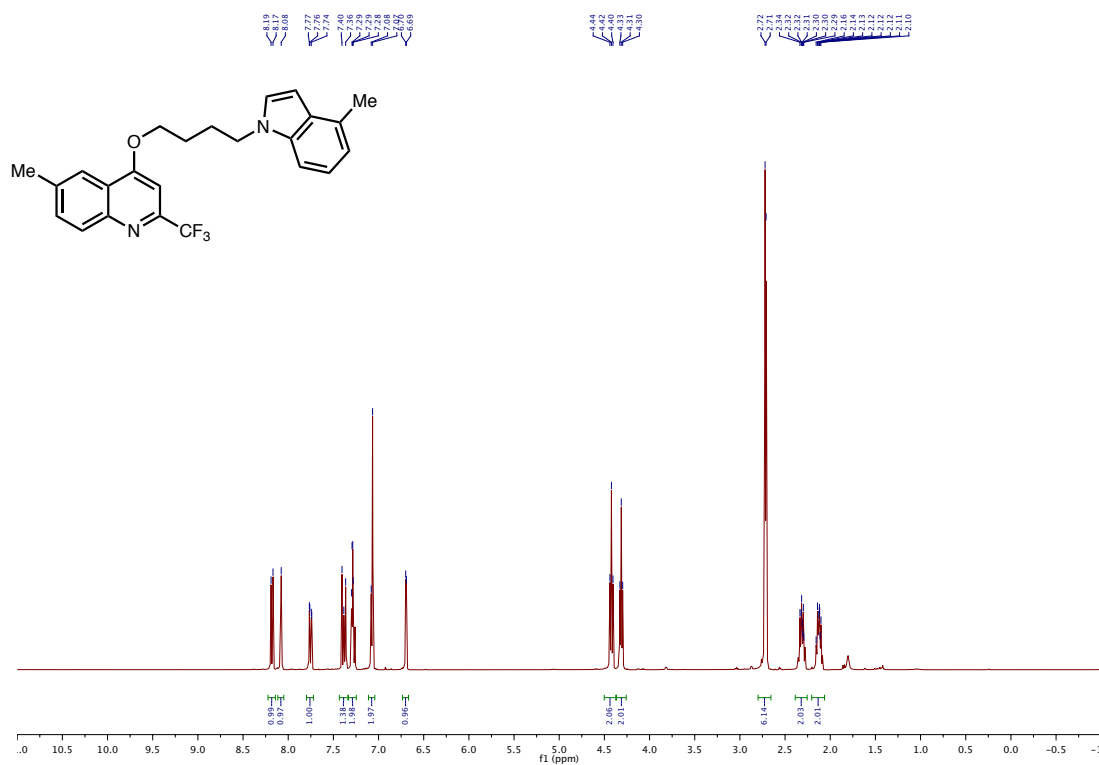

<sup>13</sup>C NMR, 101 MHz, CDCl<sub>3</sub>

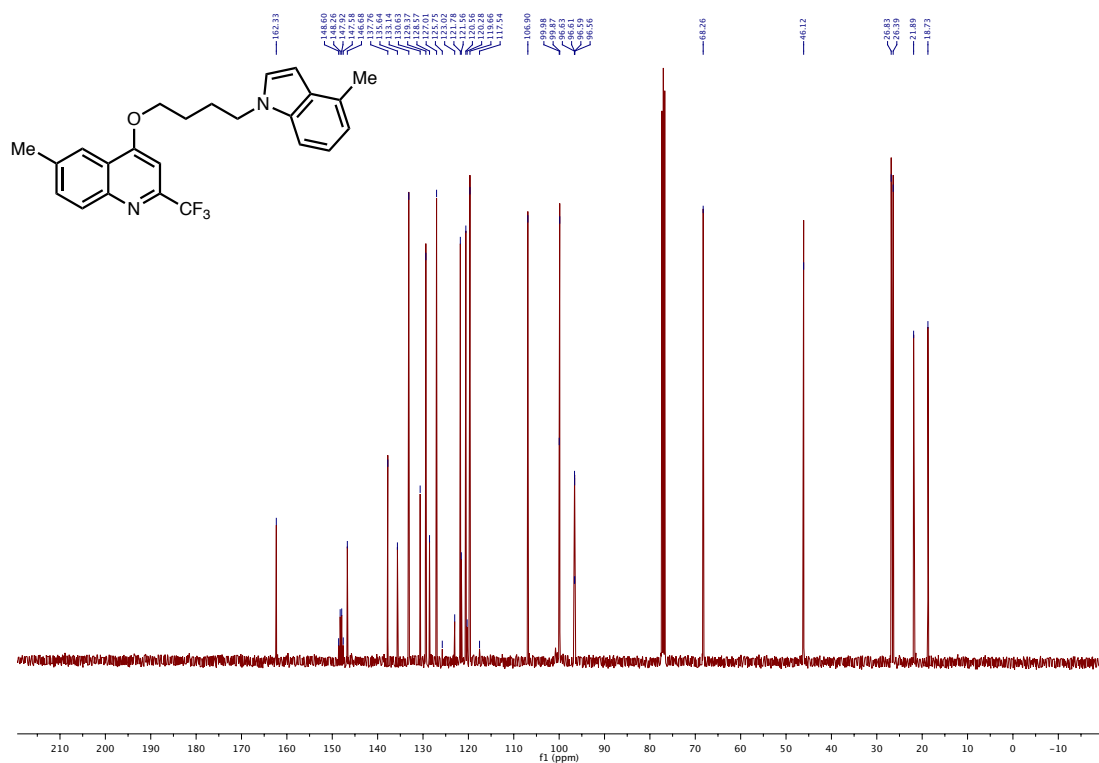

$^{19}\text{F}$  NMR, 376 MHz,  $\text{CDCl}_3$

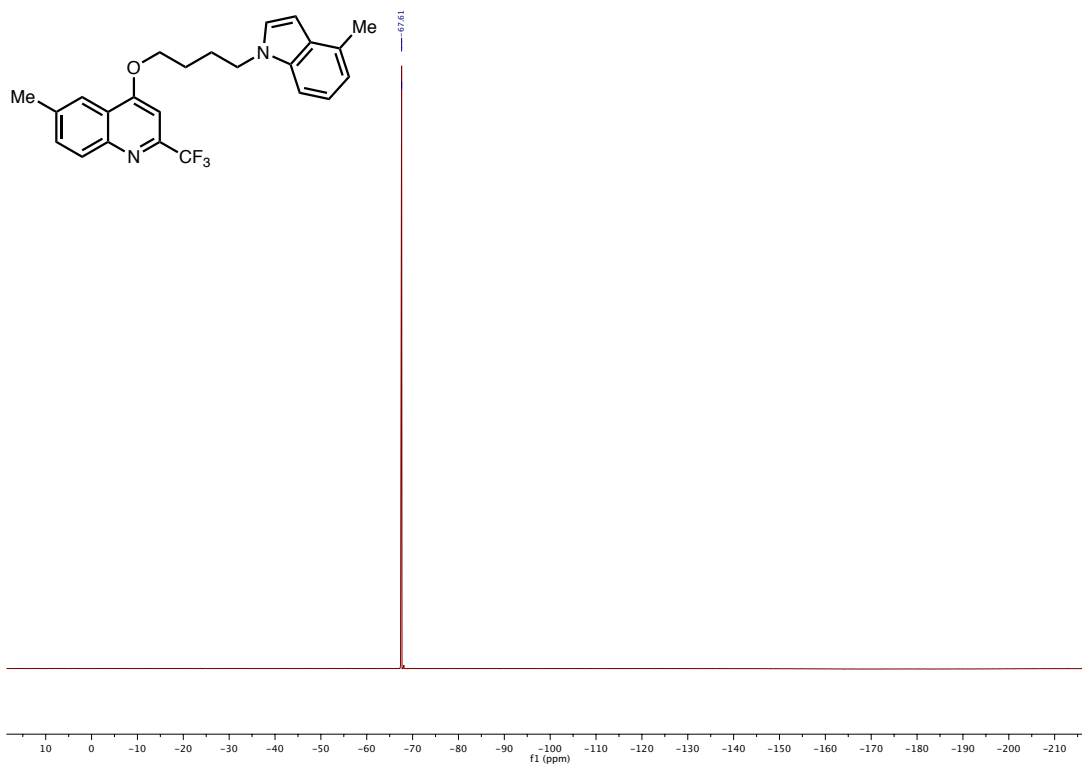

**(Z)-1-(hex-4-en-1-yl)-1H-indole (3q)**

<sup>1</sup>H NMR, 400 MHz, CDCl<sub>3</sub>

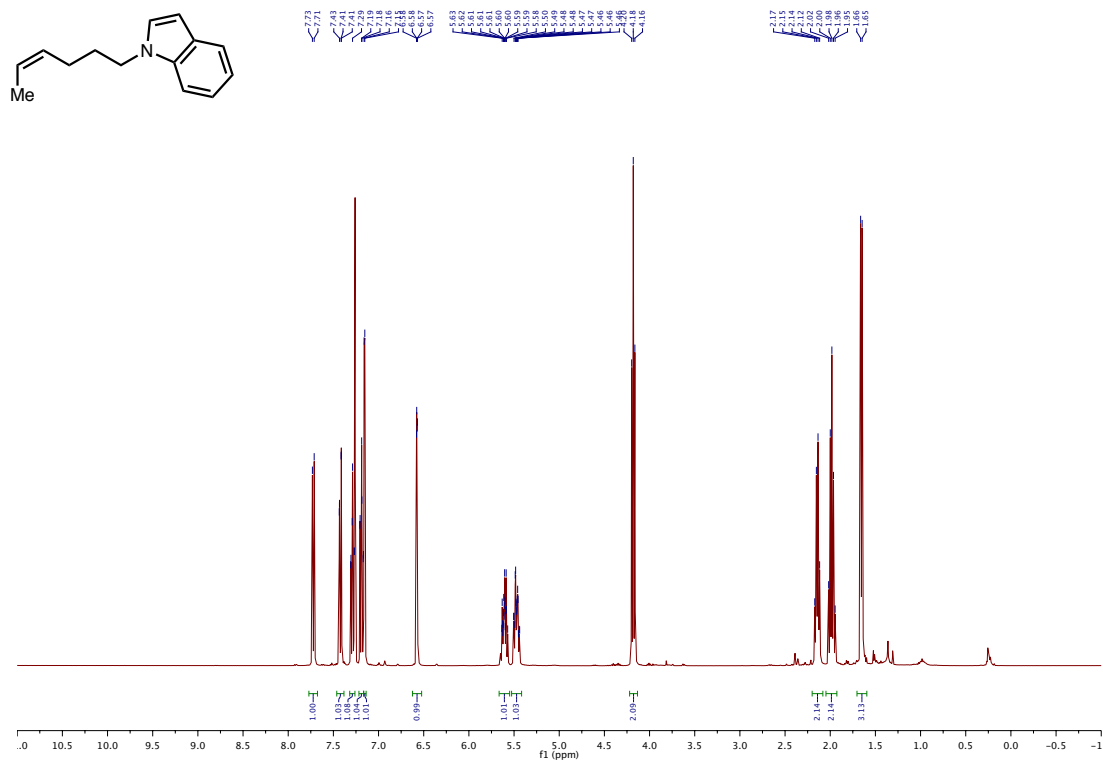

<sup>13</sup>C NMR, 101 MHz, CDCl<sub>3</sub>

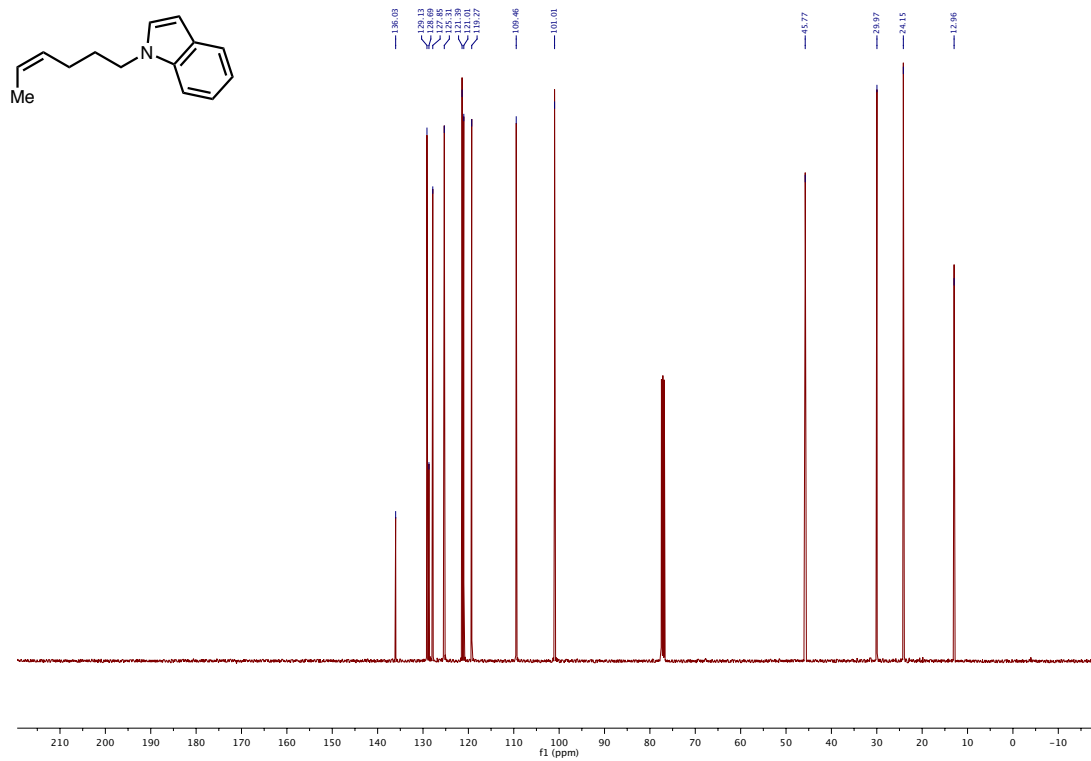

### (S)-1-(3,7-dimethyloct-6-en-1-yl)-1H-indole (3r)

$^1\text{H}$  NMR, 400 MHz,  $\text{CDCl}_3$

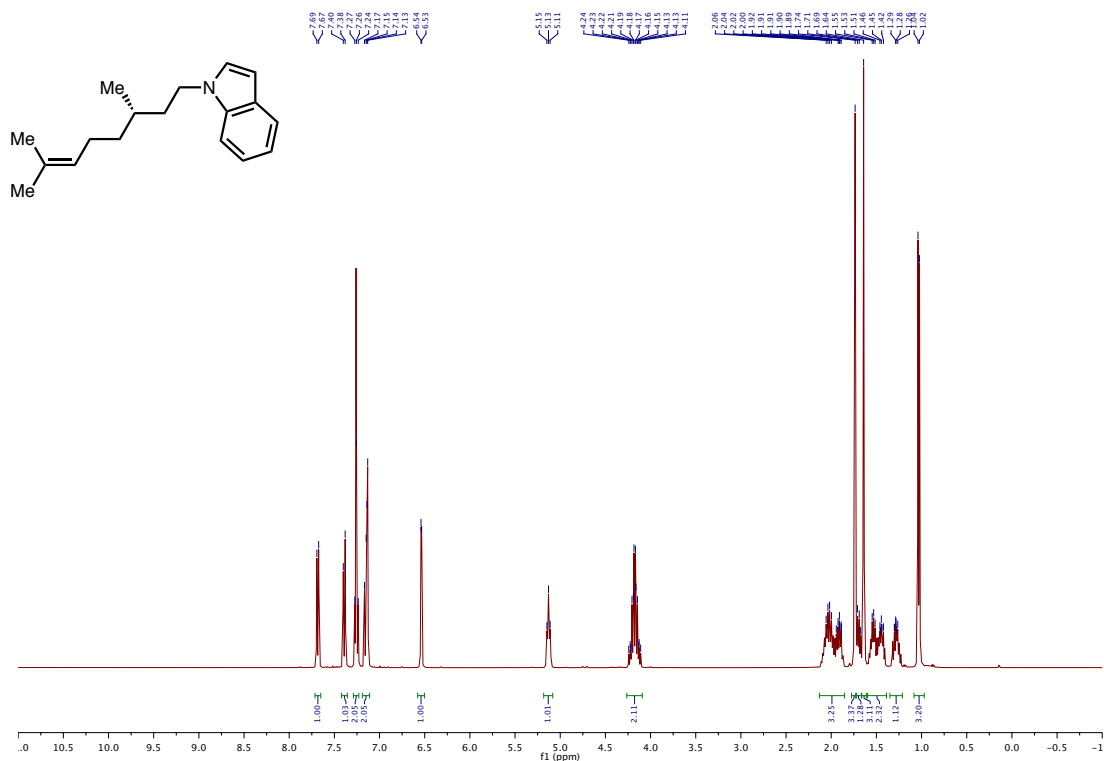

$^{13}\text{C}$  NMR, 101 MHz,  $\text{CDCl}_3$

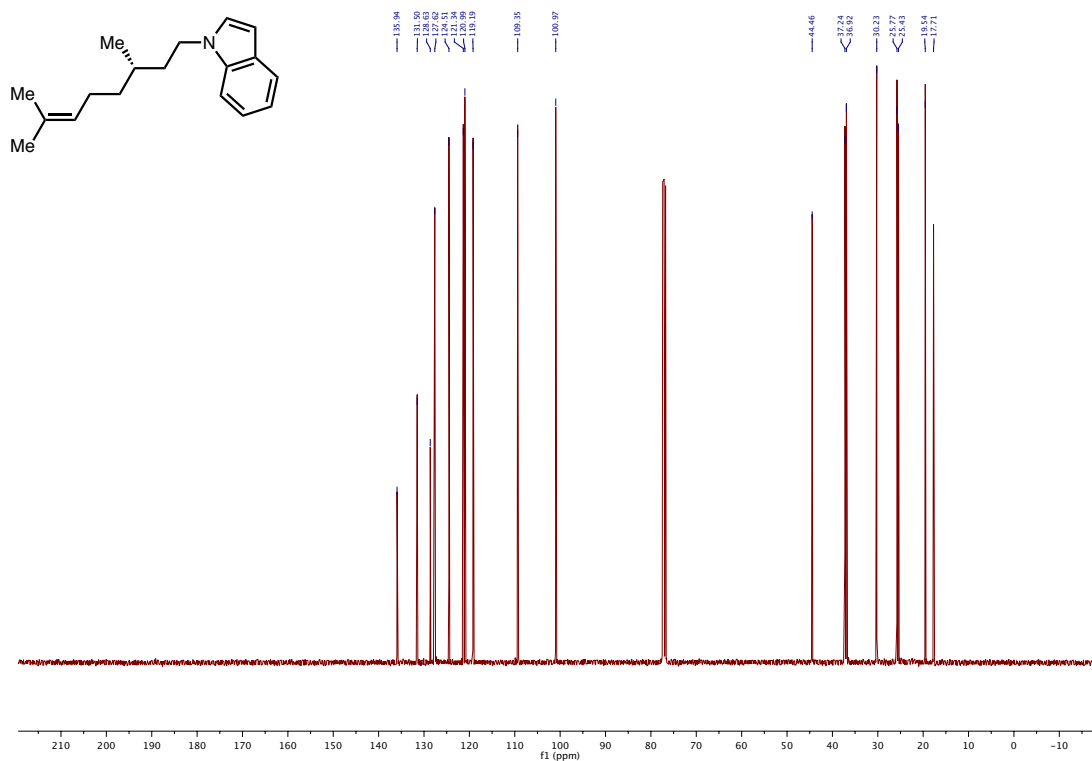

### 6-chloro-1-(2-(cyclohex-3-en-1-yl)ethyl)-1H-indole (3s)

$^1\text{H}$  NMR, 400 MHz,  $\text{CDCl}_3$

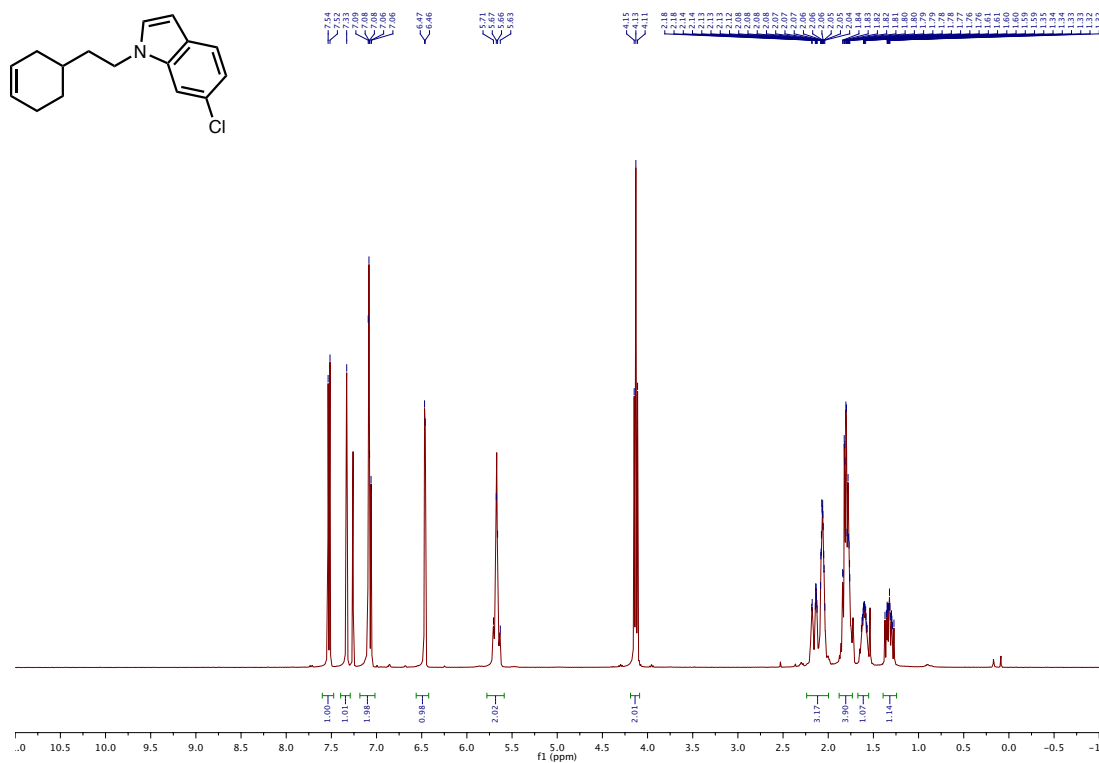

$^{13}\text{C}$  NMR, 101 MHz,  $\text{CDCl}_3$

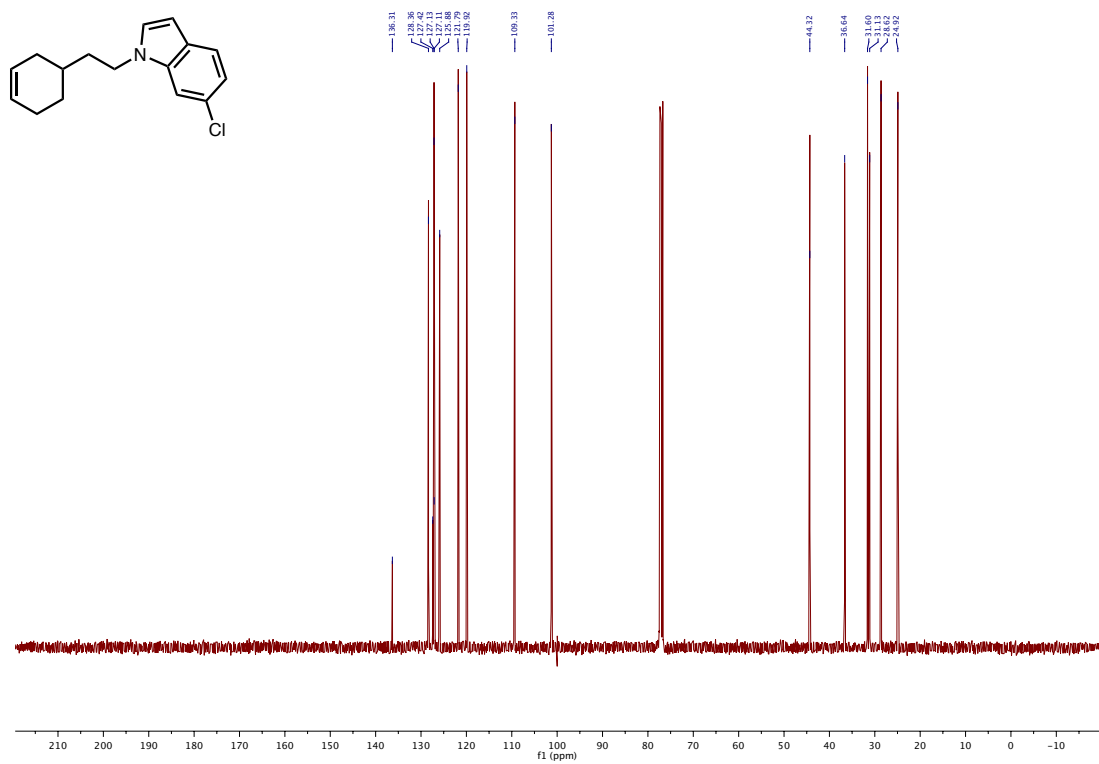

**(S)-3-(1*H*-indol-1-yl)-*N*-methyl-3-phenylpropan-1-amine (3t) (~95% purity)**

<sup>1</sup>H NMR, 400 MHz, CDCl<sub>3</sub>

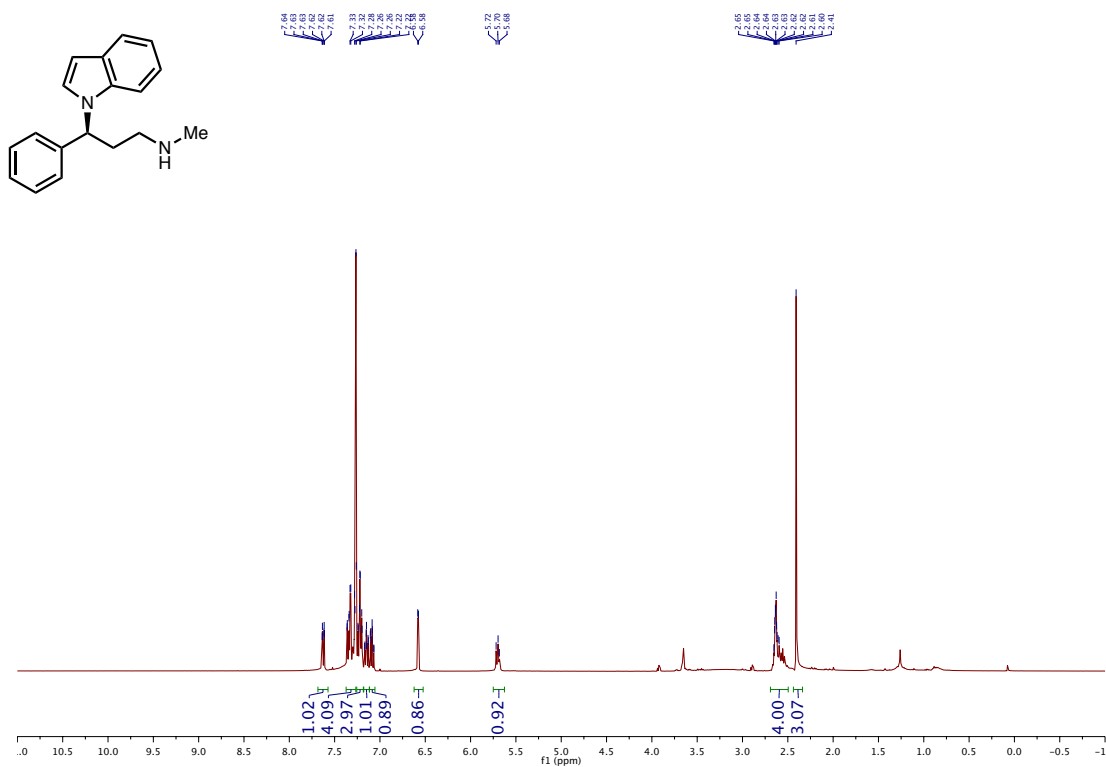

<sup>13</sup>C NMR, 101 MHz, CDCl<sub>3</sub>

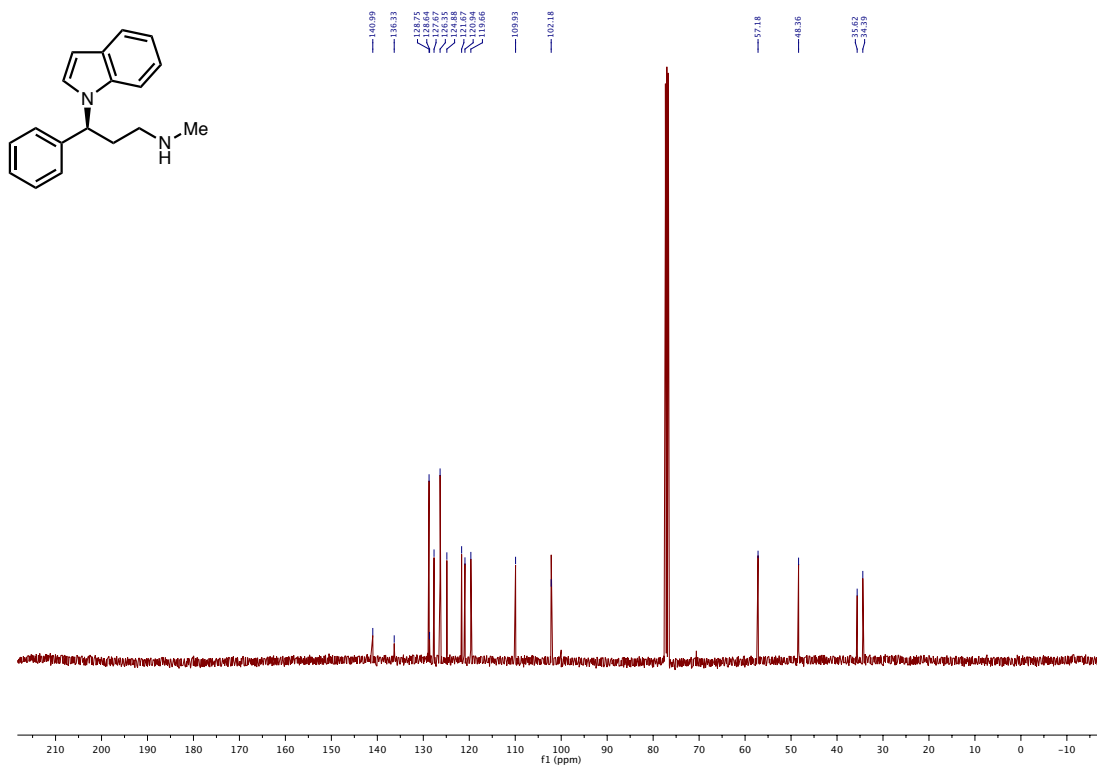



**(S)-3-(1-phenylethyl)-1H-indole (4a)**

$^1\text{H}$  NMR, 400 MHz,  $\text{CDCl}_3$

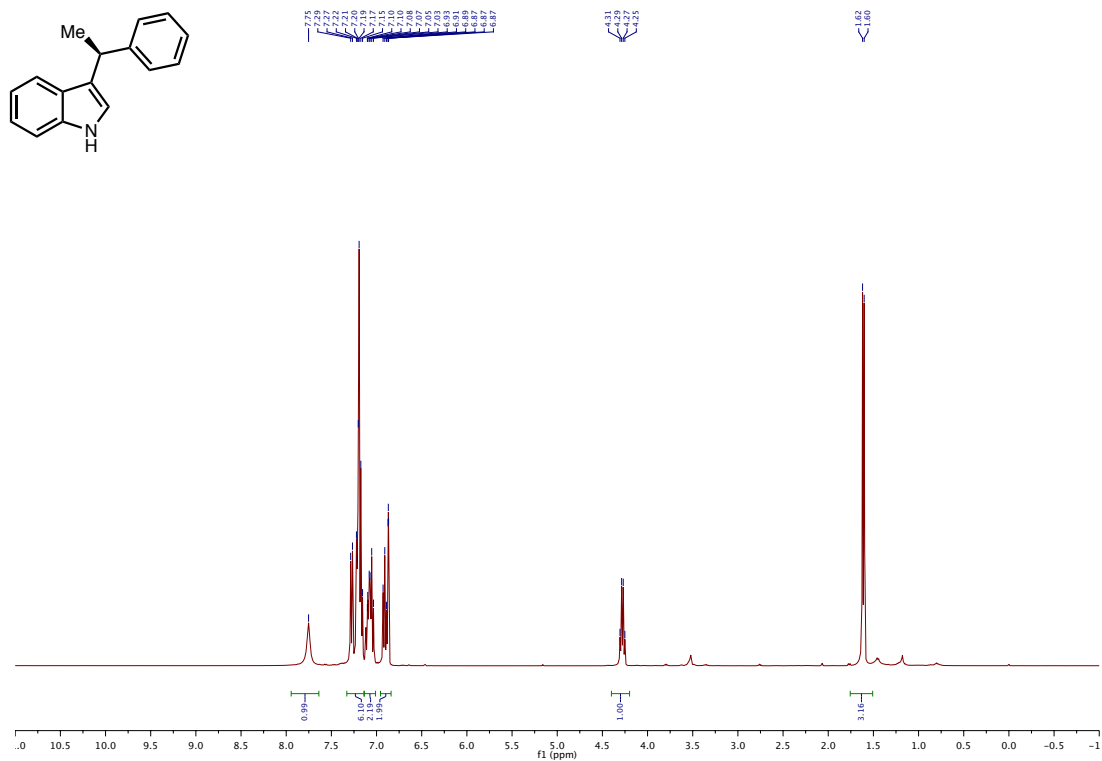

$^{13}\text{C}$  NMR, 101 MHz,  $\text{CDCl}_3$

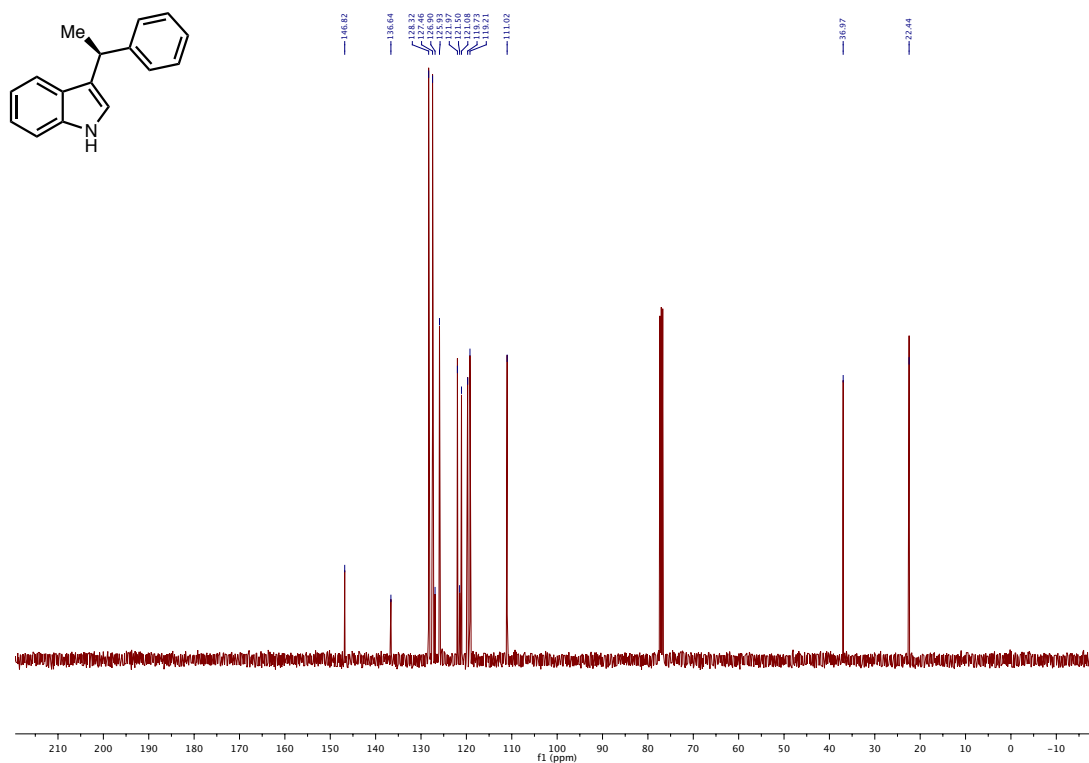

**(S)-3-(1-(4-(trifluoromethyl)phenyl)ethyl)-1H-indole (4b)**

<sup>1</sup>H NMR, 400 MHz, CDCl<sub>3</sub>

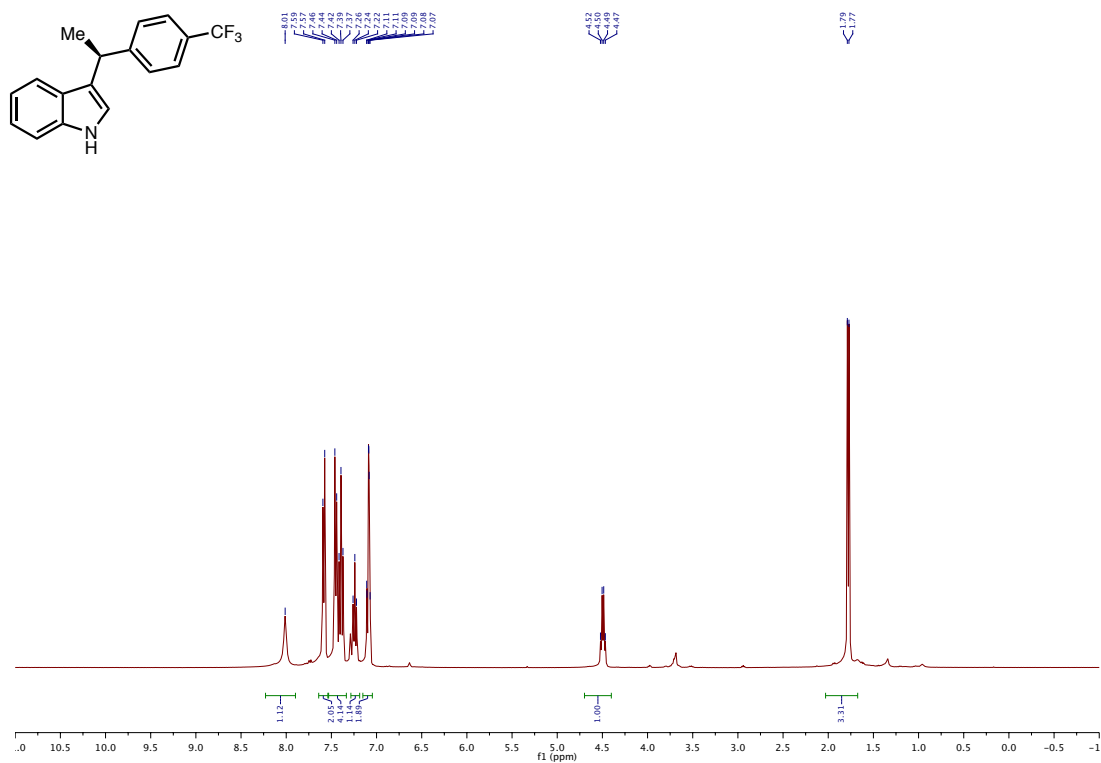

<sup>13</sup>C NMR, 101 MHz, CDCl<sub>3</sub>

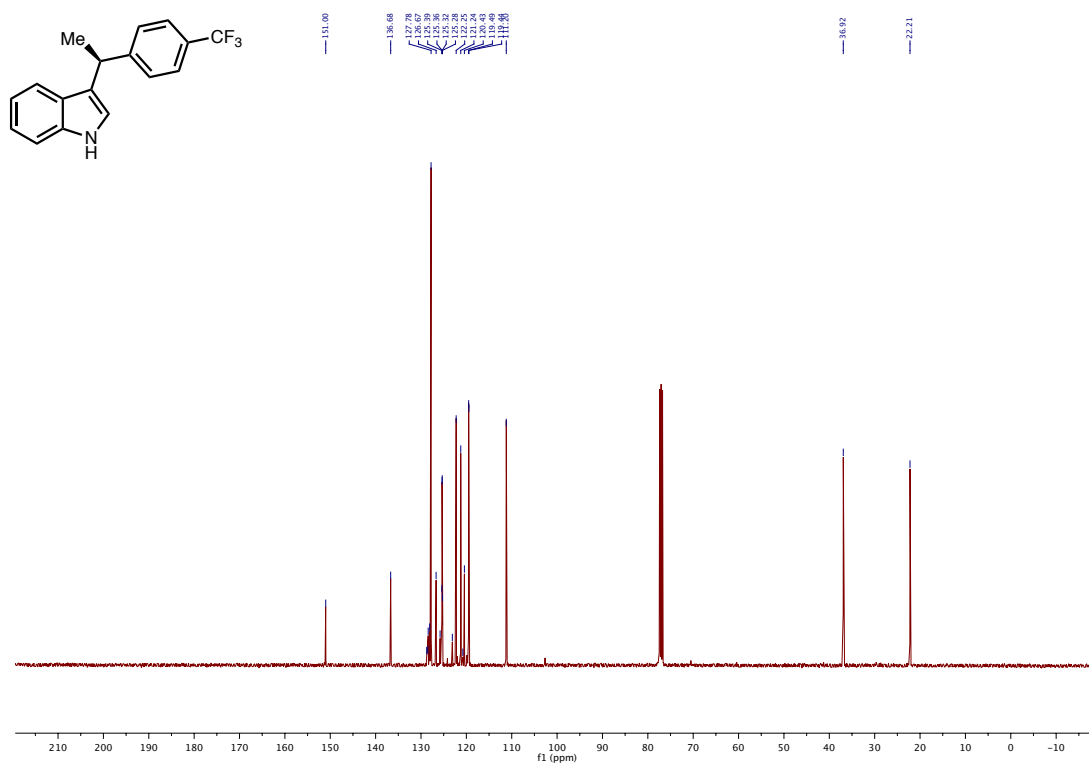

$^{19}\text{F}$  NMR, 376 MHz,  $\text{CDCl}_3$

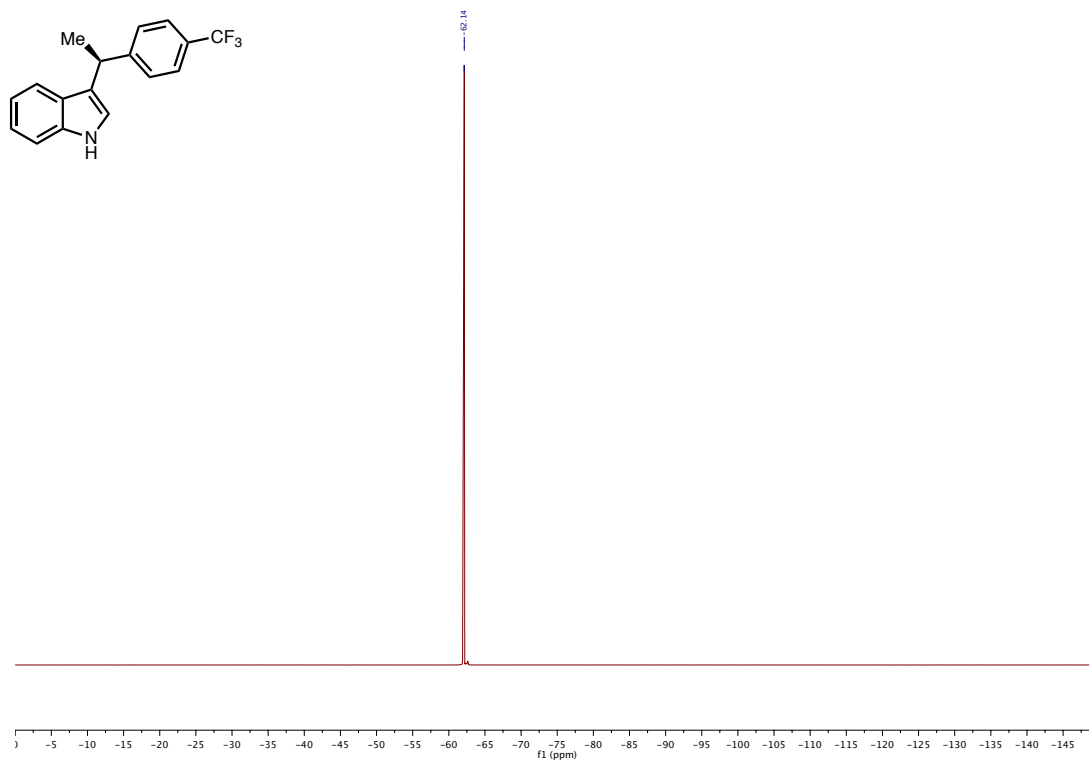

**(S)-5-(1-(1H-indol-3-yl)ethyl)-1-tosyl-1H-indole (4c)**

<sup>1</sup>H NMR, 400 MHz, CDCl<sub>3</sub>

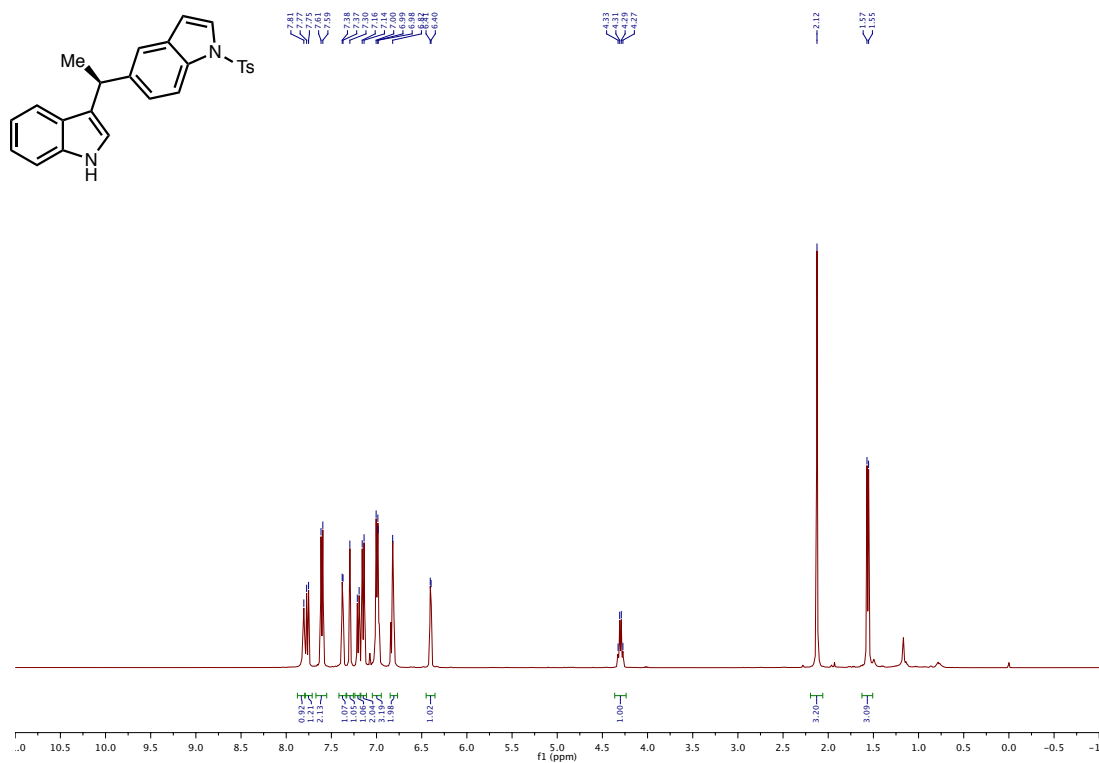

<sup>13</sup>C NMR, 101 MHz, CDCl<sub>3</sub>

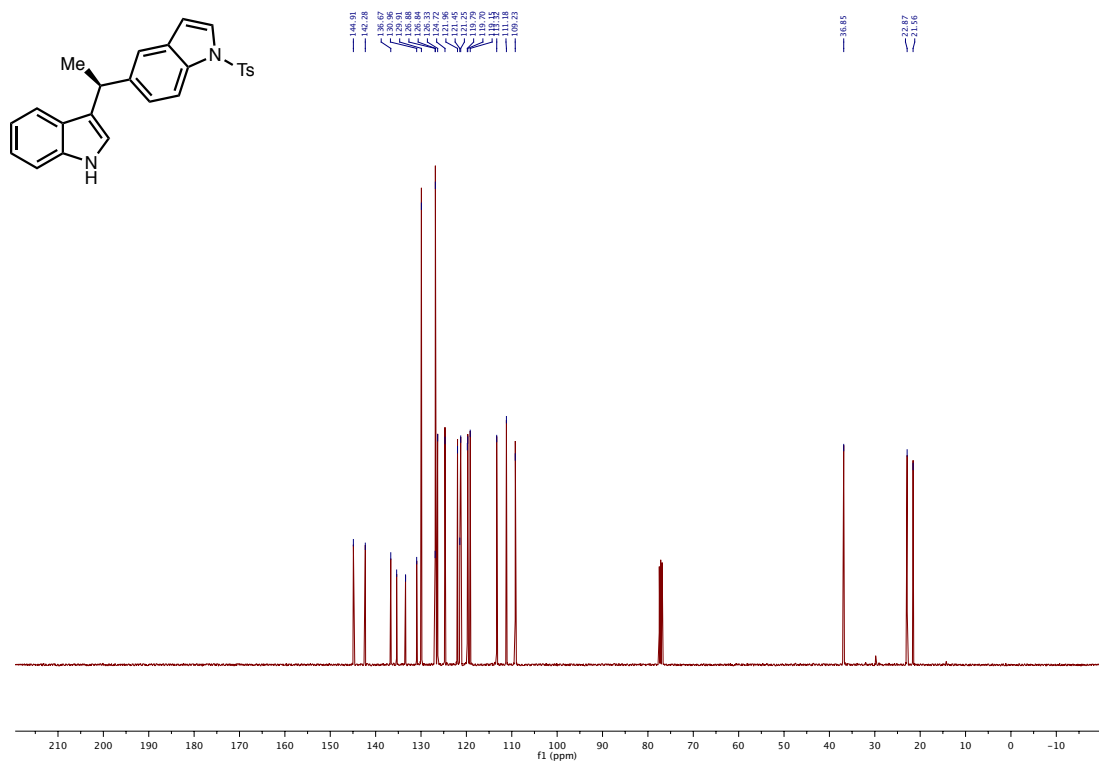

**(S)-3-(1H-indol-3-yl)-N-(4-methoxybenzyl)-N-methyl-3-phenylpropan-1-amine (4d)**

<sup>1</sup>H NMR, 400 MHz, CDCl<sub>3</sub>

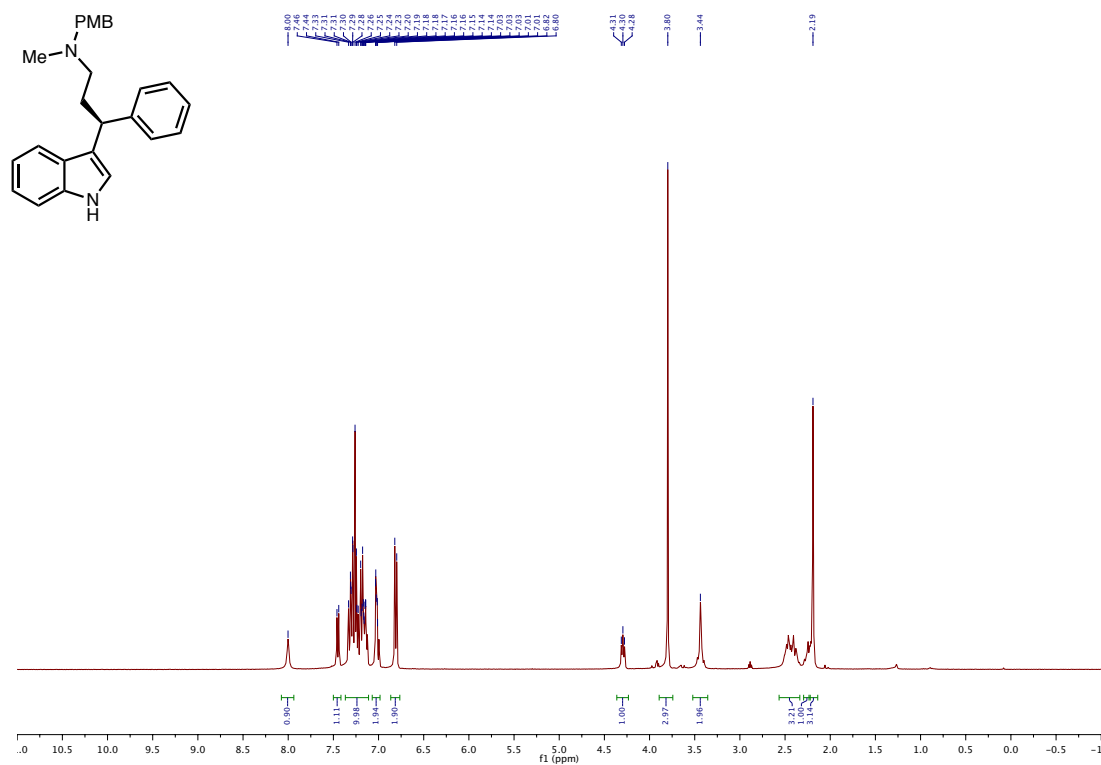

<sup>13</sup>C NMR, 101 MHz, CDCl<sub>3</sub>

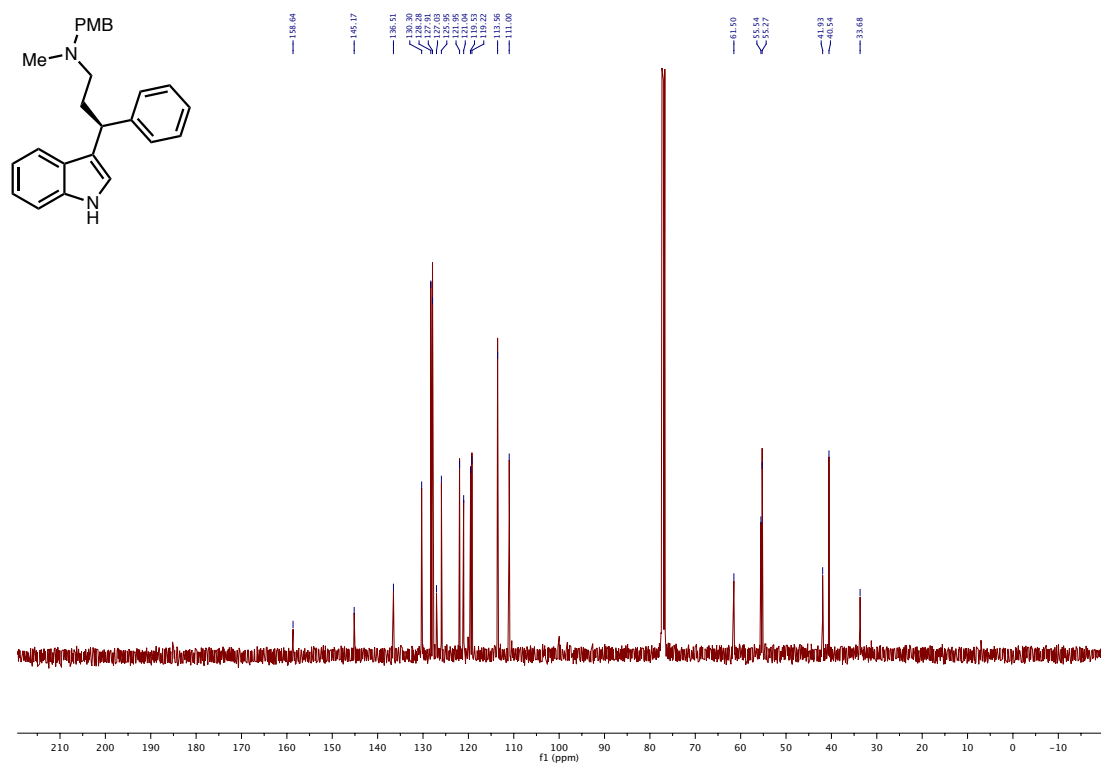





**tert-butyl (S)-3-(1-(11-(1-(ethoxycarbonyl)piperidin-4-ylidene)-6,11-dihydro-5H-benzo[5,6]cyclohepta[1,2-b]pyridin-8-yl)ethyl)-1H-indole-1-carboxylate (4f')**

<sup>1</sup>H NMR, 400 MHz, CDCl<sub>3</sub>

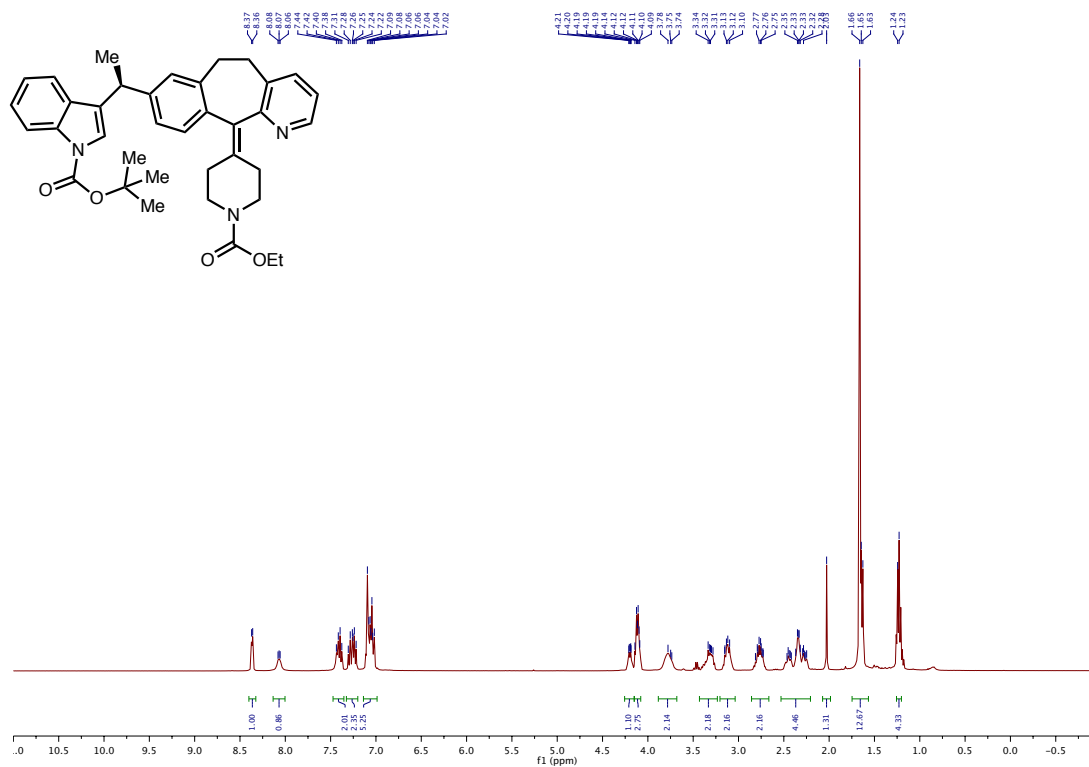

<sup>13</sup>C NMR, 101 MHz, CDCl<sub>3</sub>

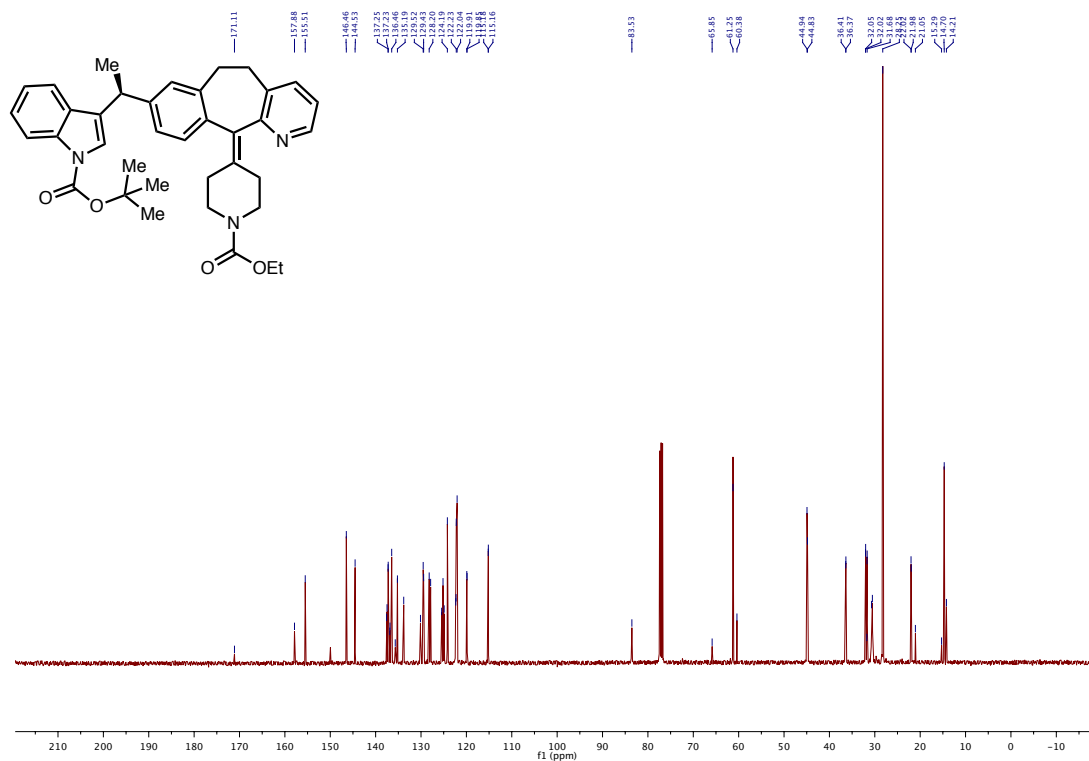



### 3-(3-(2-fluoro-4-methoxyphenyl)propyl)-1H-indole (4g)

<sup>1</sup>H NMR, 400 MHz, CDCl<sub>3</sub>

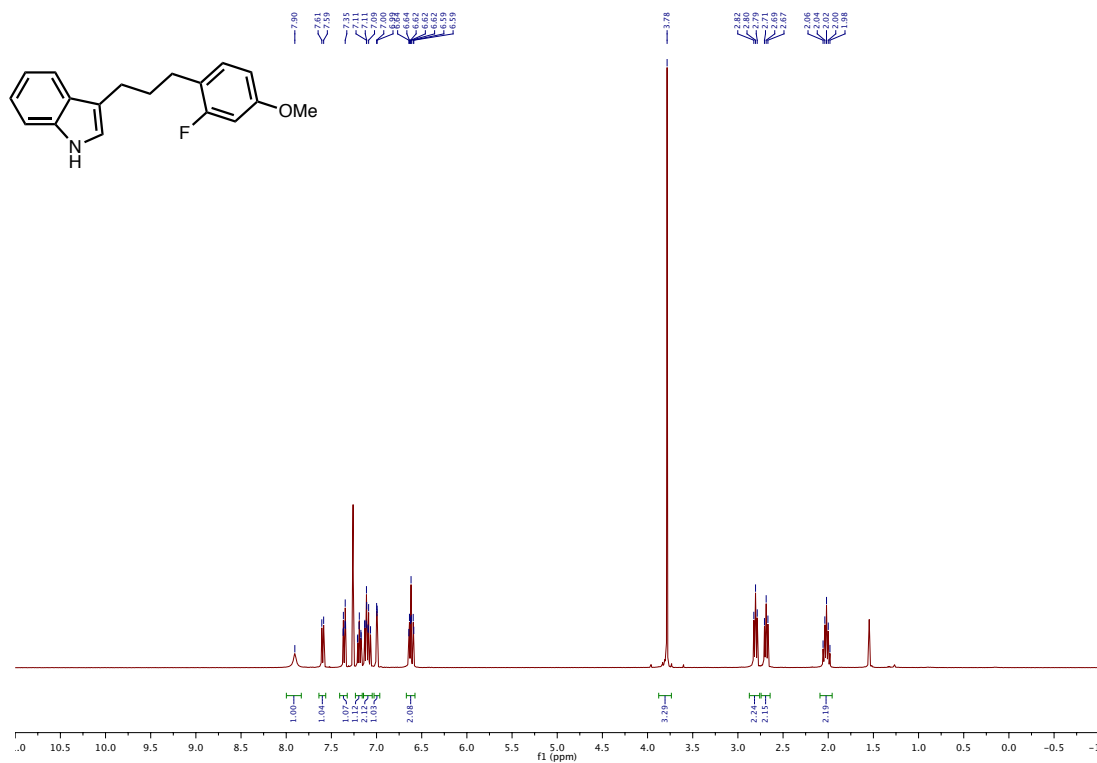

<sup>13</sup>C NMR, 101 MHz, CDCl<sub>3</sub>

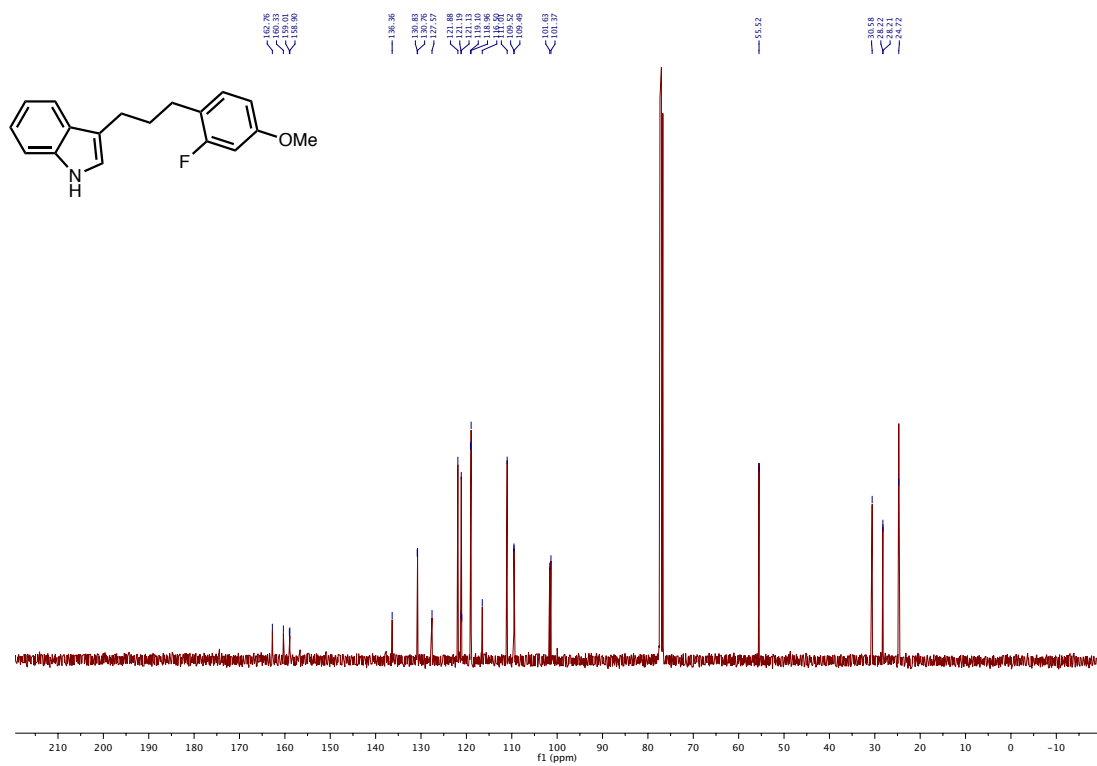

$^{19}\text{F}$  NMR, 376 MHz,  $\text{CDCl}_3$

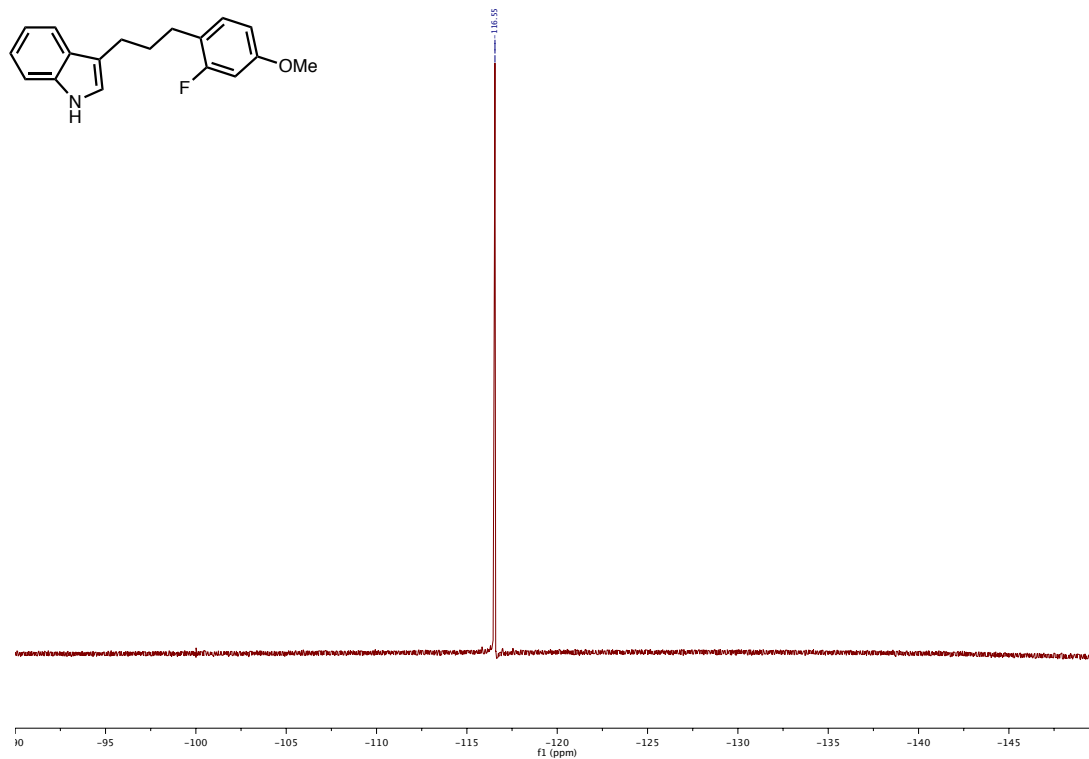

# 1H-indol-1-yl benzoate (2a)

<sup>1</sup>H NMR, 400 MHz, CDCl<sub>3</sub>

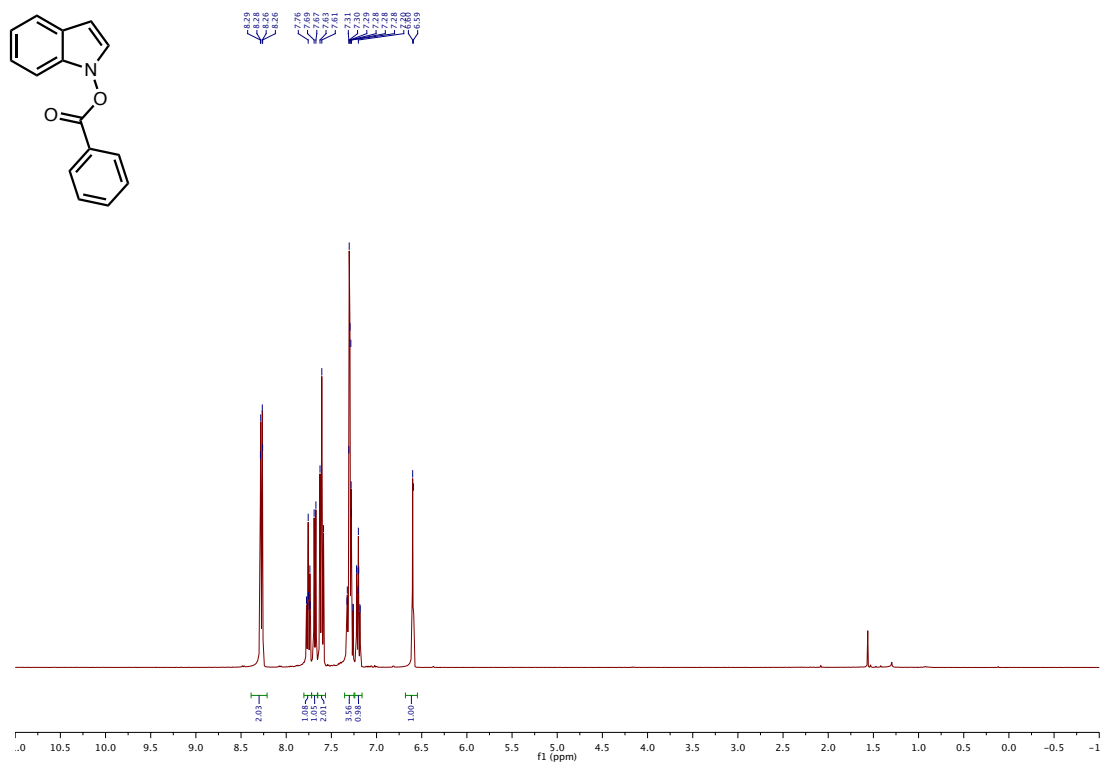

<sup>13</sup>C NMR, 101 MHz, CDCl<sub>3</sub>

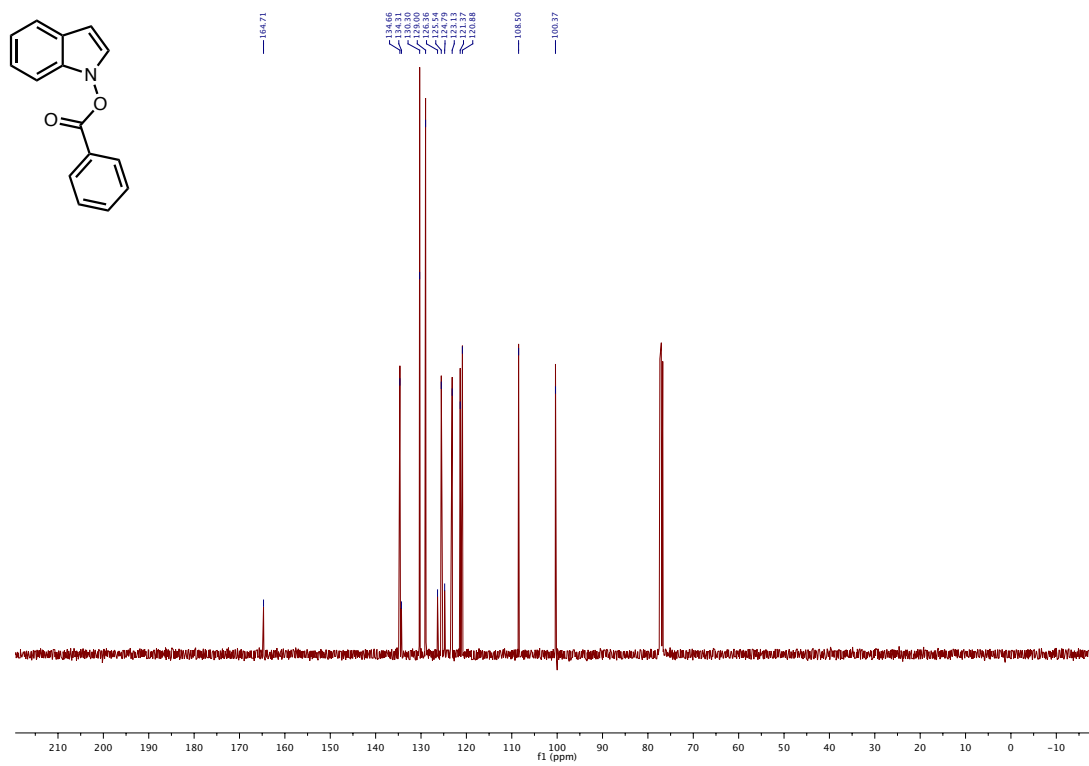

# 1H-indol-1-yl 4-(dimethylamino)benzoate (2b)

<sup>1</sup>H NMR, 400 MHz, CDCl<sub>3</sub>

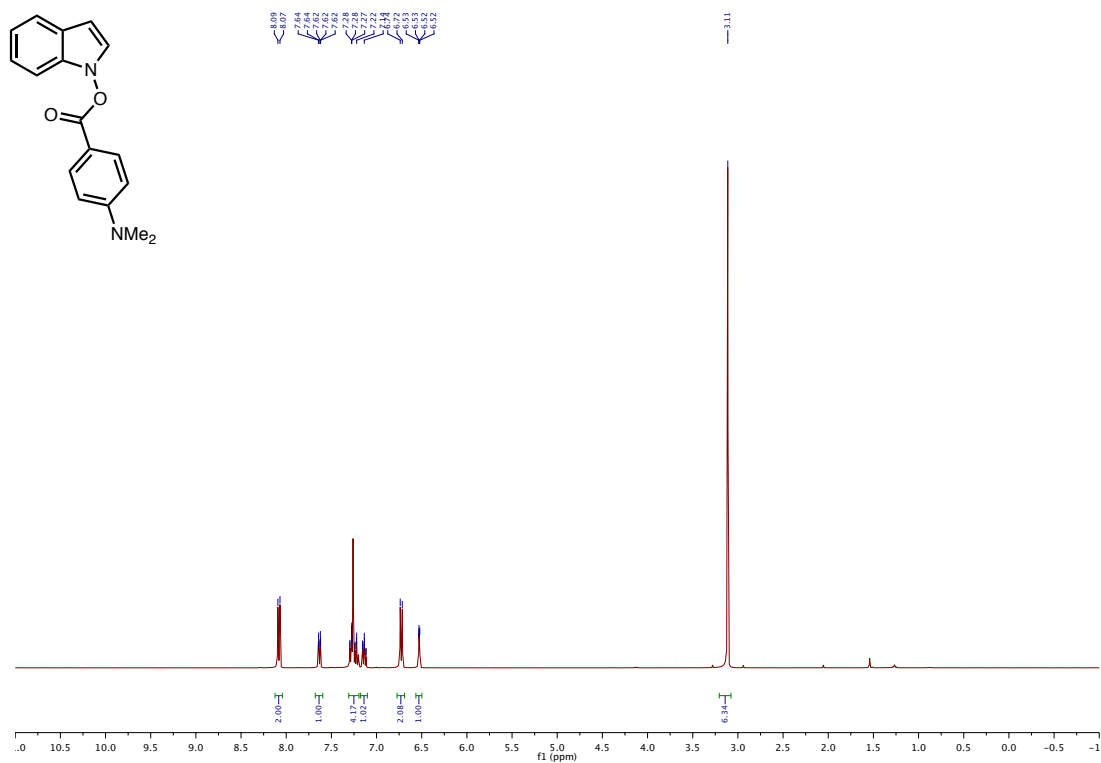

<sup>13</sup>C NMR, 101 MHz, CDCl<sub>3</sub>

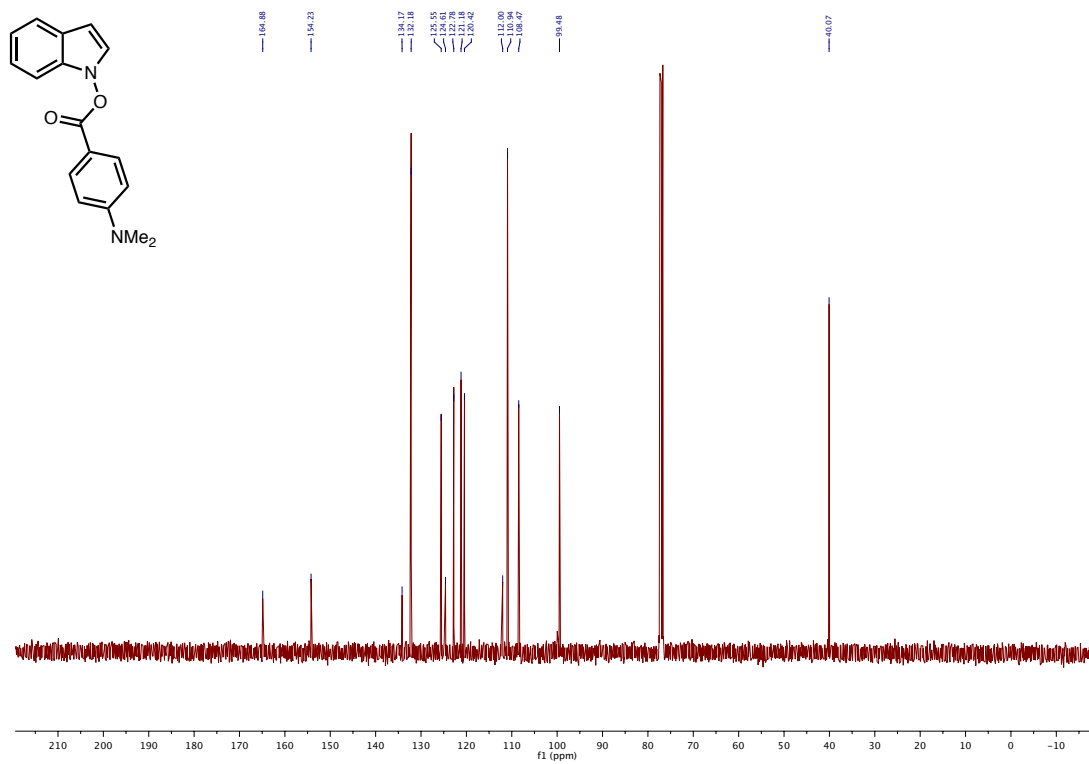

# 1*H*-indol-1-yl 4-(trifluoromethyl)benzoate (2c)

<sup>1</sup>H NMR, 400 MHz, CDCl<sub>3</sub>

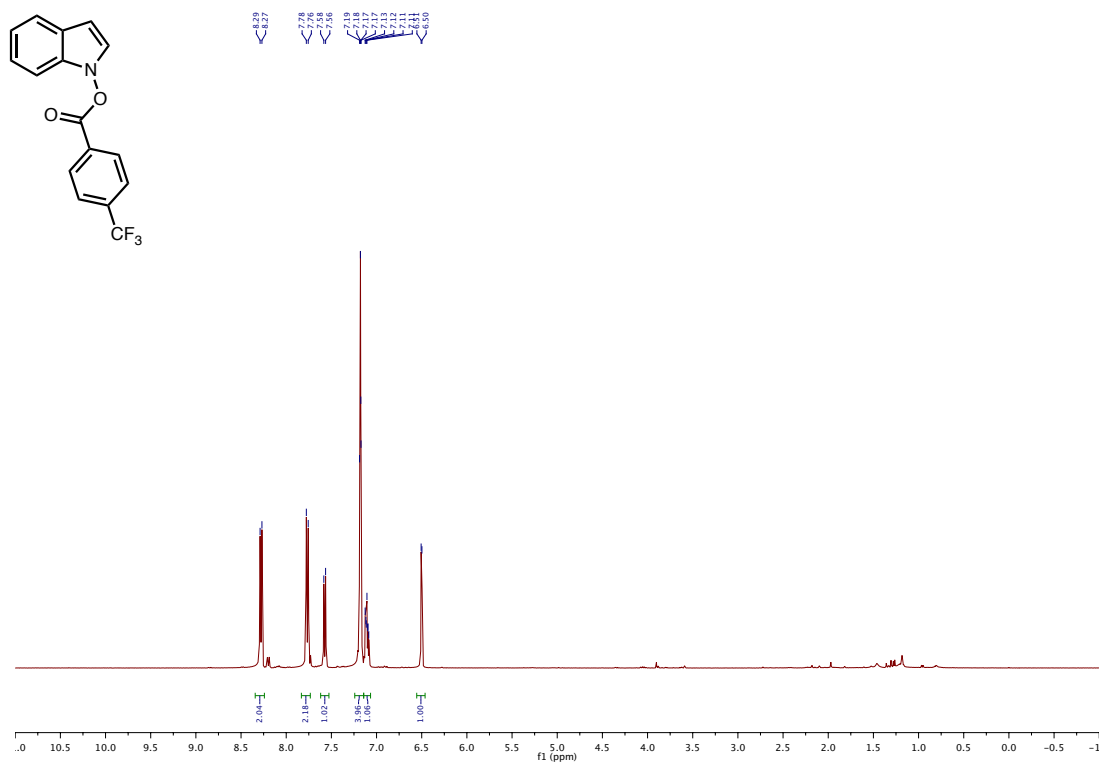

<sup>13</sup>C NMR, 101 MHz, CDCl<sub>3</sub>

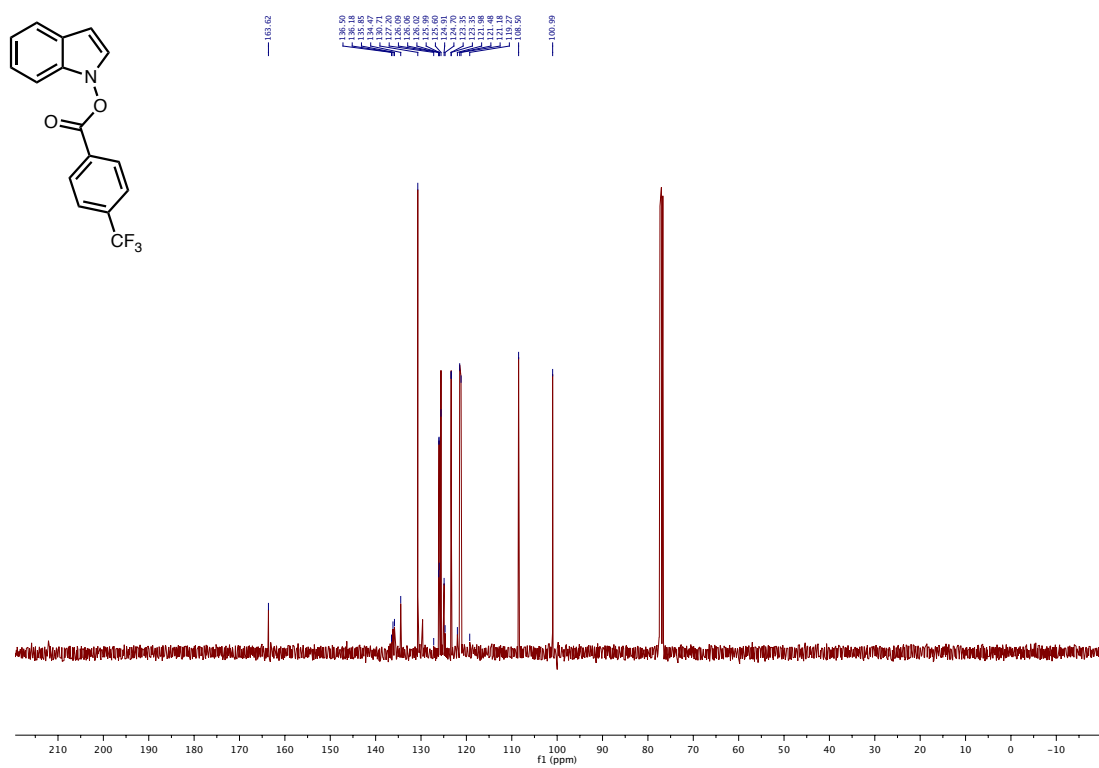

$^{19}\text{F}$  NMR, 376 MHz,  $\text{CDCl}_3$

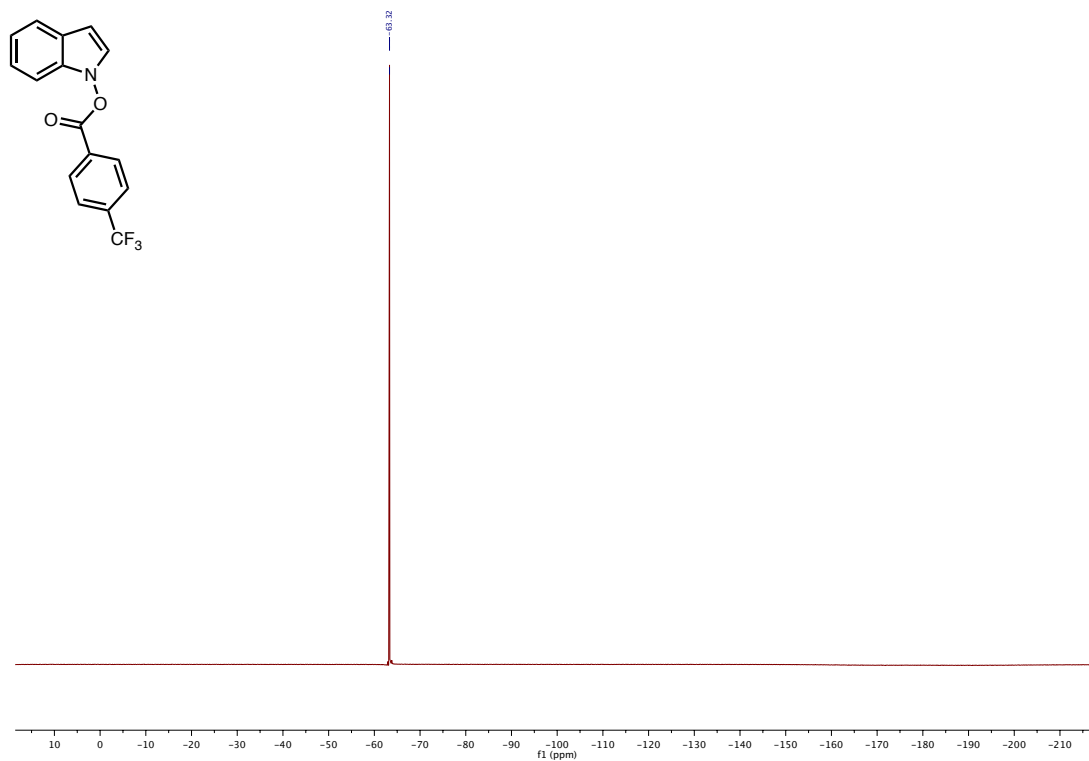



# 6-(trifluoromethyl)-1H-indol-1-yl 2,4,6-trimethylbenzoate (2e)

<sup>1</sup>H NMR, 400 MHz, CDCl<sub>3</sub>

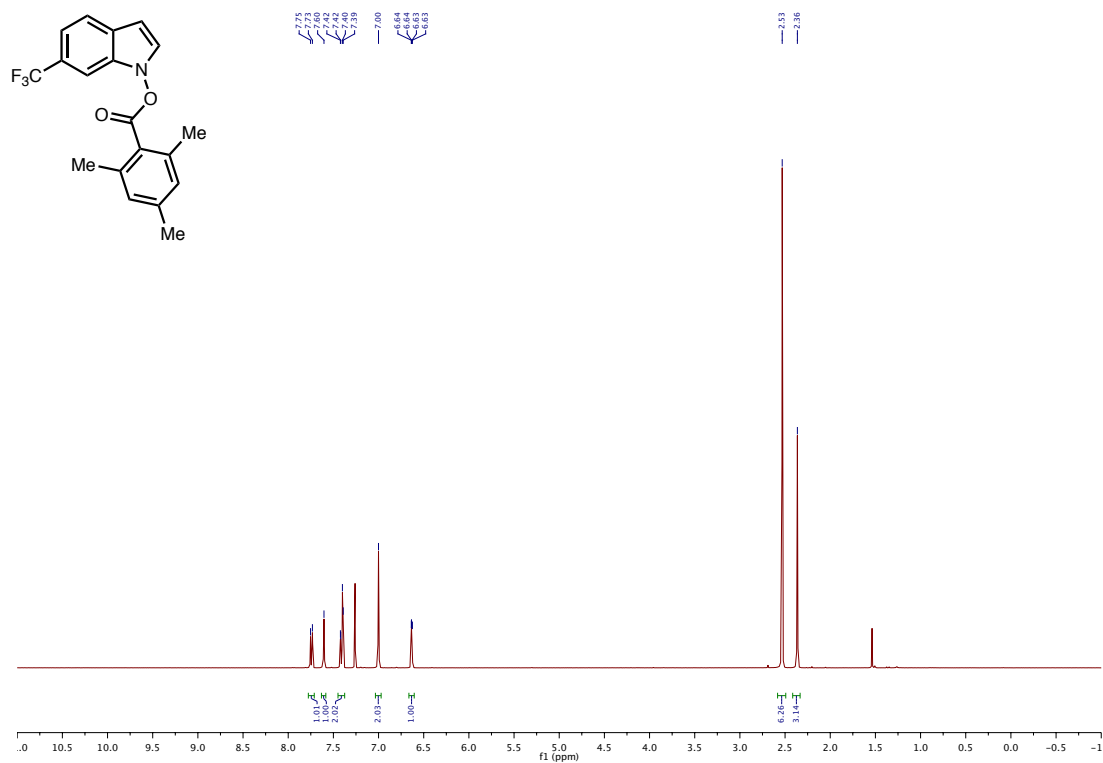

<sup>13</sup>C NMR, 101 MHz, CDCl<sub>3</sub>

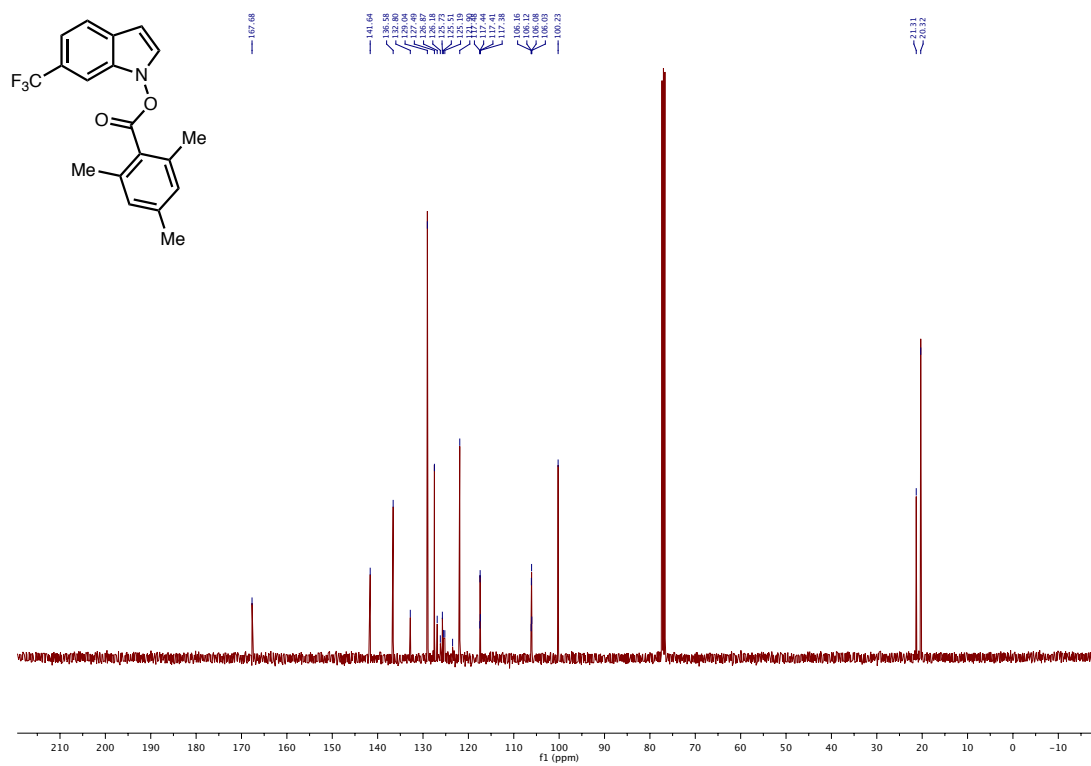



$^{19}\text{F}$  NMR, 376 MHz,  $\text{CDCl}_3$

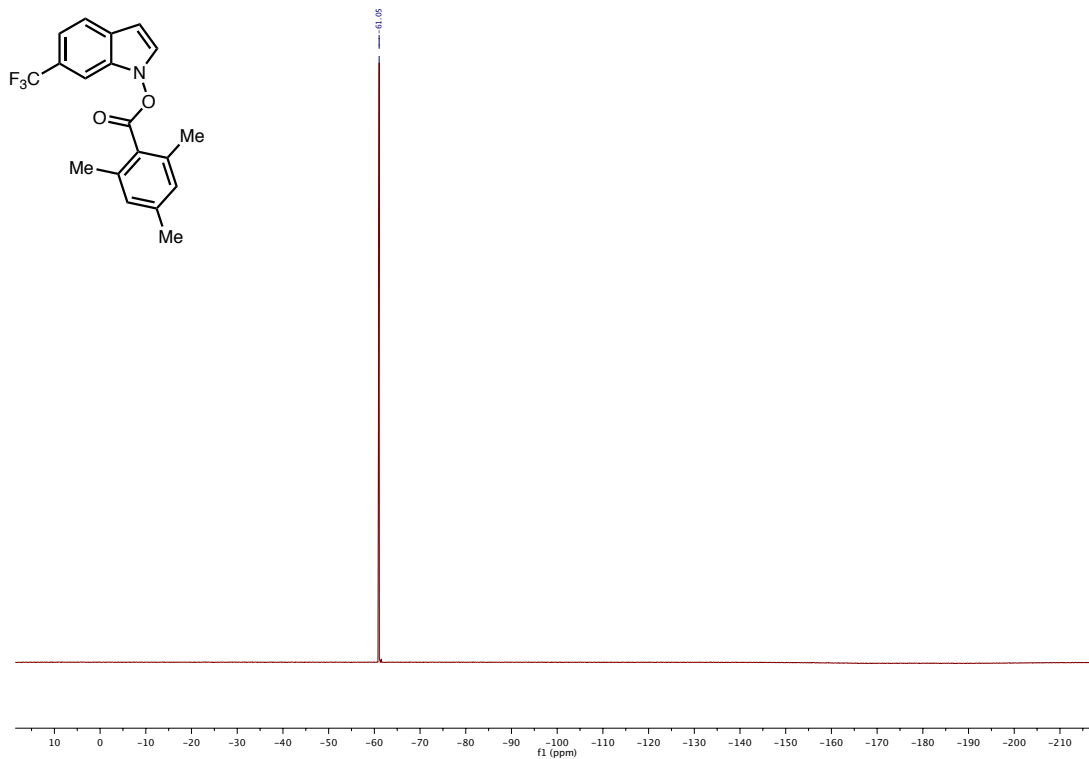

***tert*-butyl 1-((2,4,6-trimethylbenzoyl)oxy)-1*H*-indole-4-carboxylate (2f)**

<sup>1</sup>H NMR, 400 MHz, CDCl<sub>3</sub>

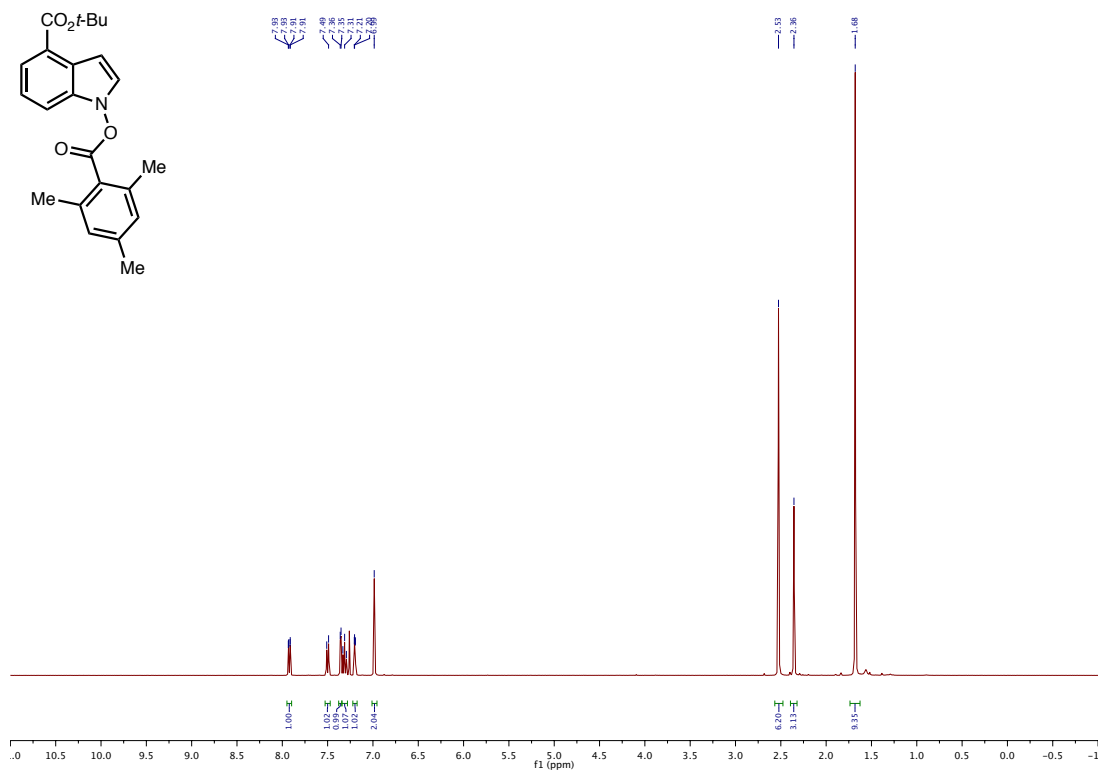

<sup>13</sup>C NMR, 101 MHz, CDCl<sub>3</sub>

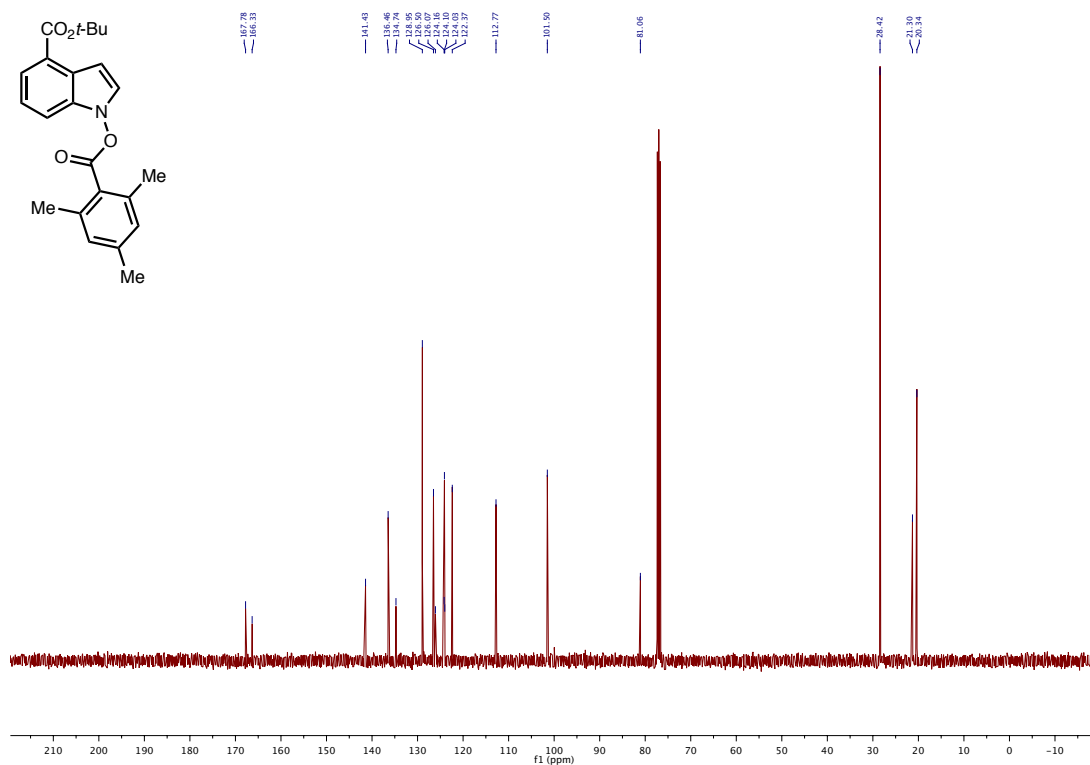

## 2-methyl-1*H*-indol-1-yl 2,4,6-trimethylbenzoate (2g)

<sup>1</sup>H NMR, 400 MHz, CDCl<sub>3</sub>

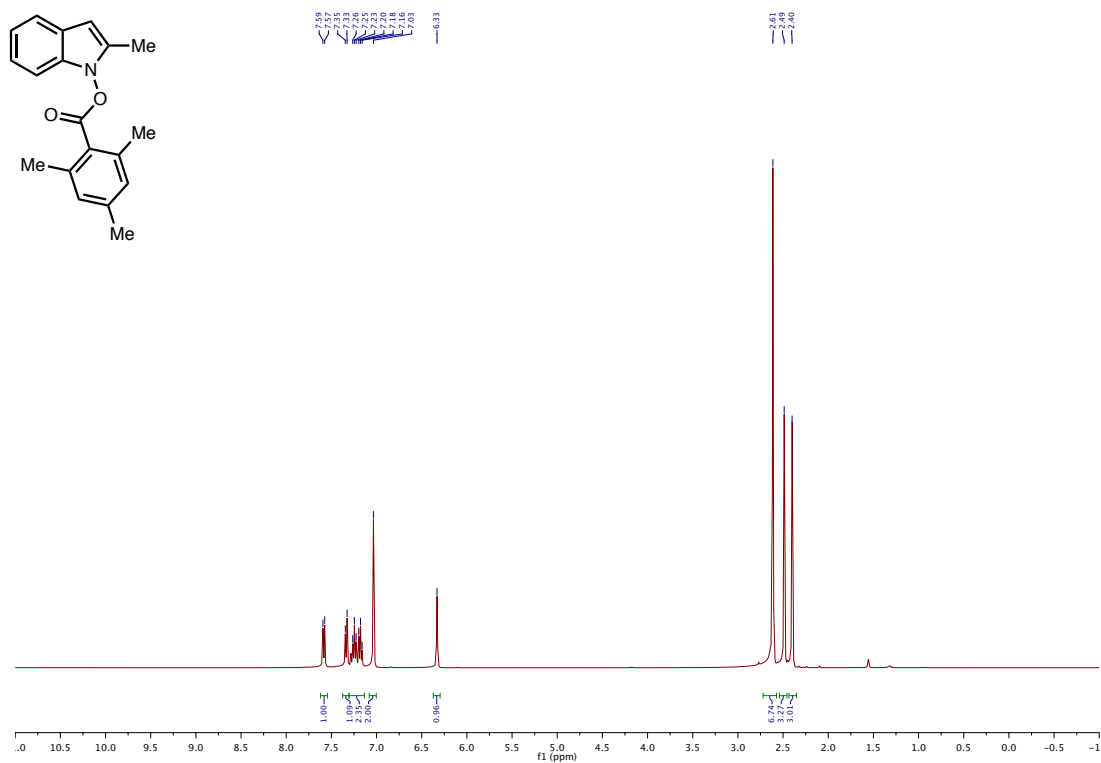

<sup>13</sup>C NMR, 101 MHz, CDCl<sub>3</sub>

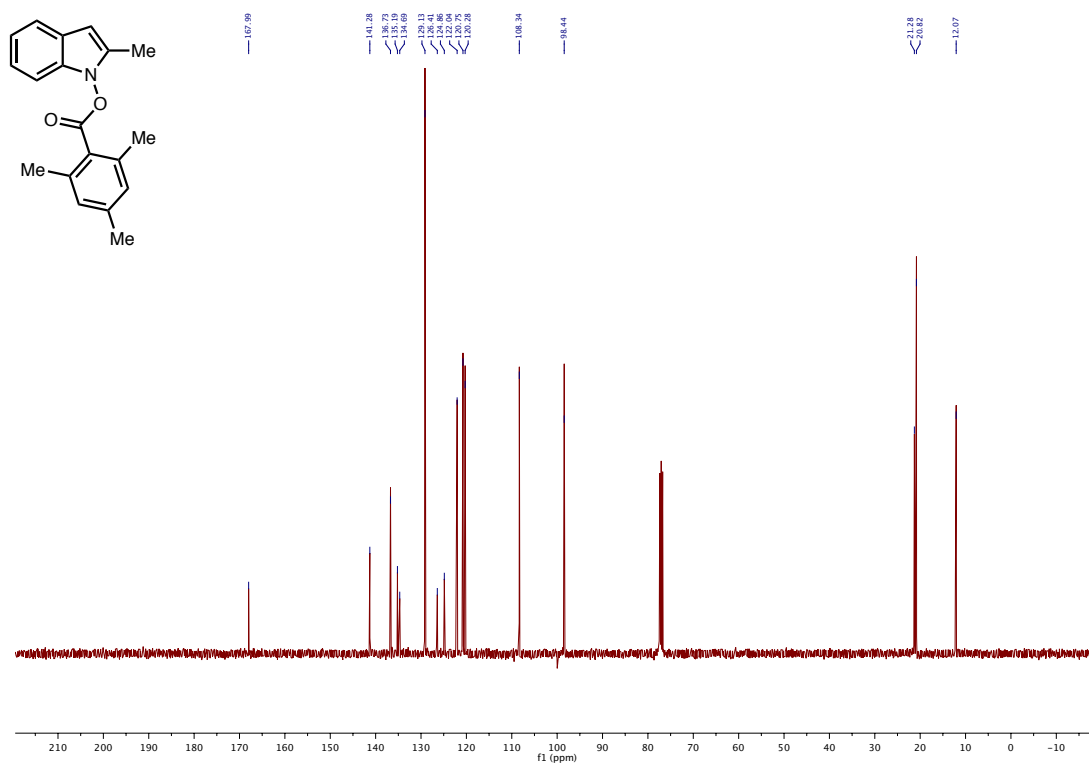



# 6-chloro-1*H*-indol-1-yl 2,4,6-trimethylbenzoate (2i)

<sup>1</sup>H NMR, 400 MHz, CDCl<sub>3</sub>

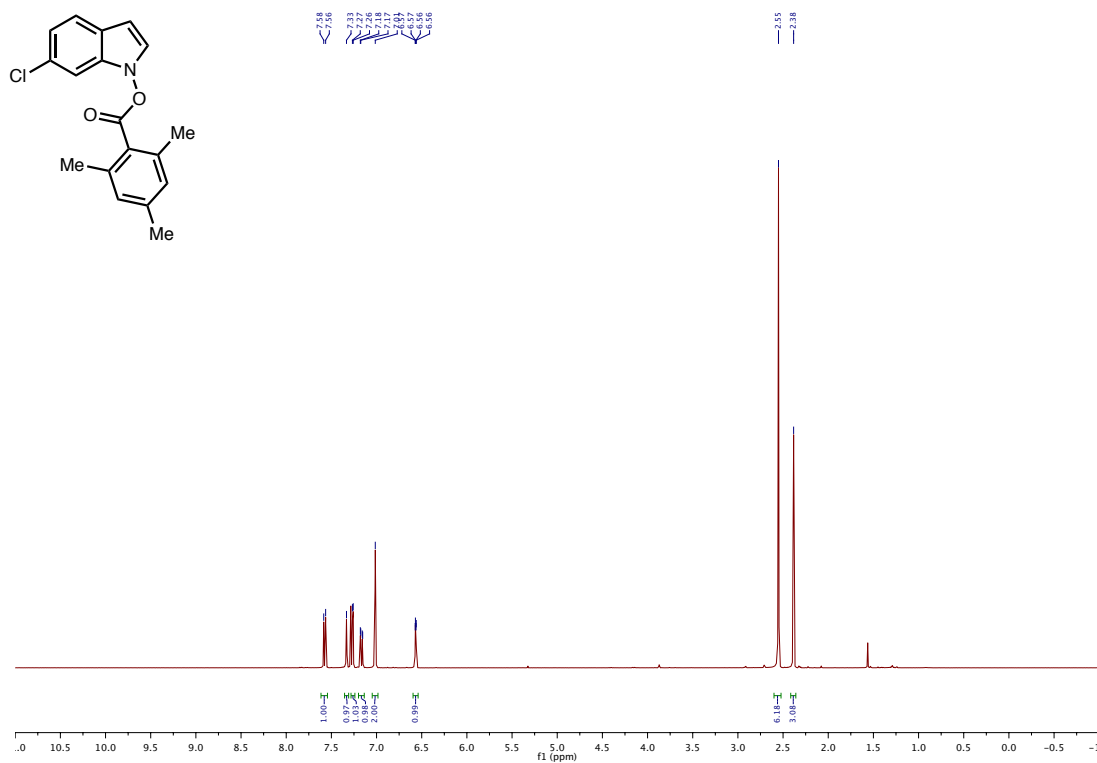

<sup>13</sup>C NMR, 101 MHz, CDCl<sub>3</sub>

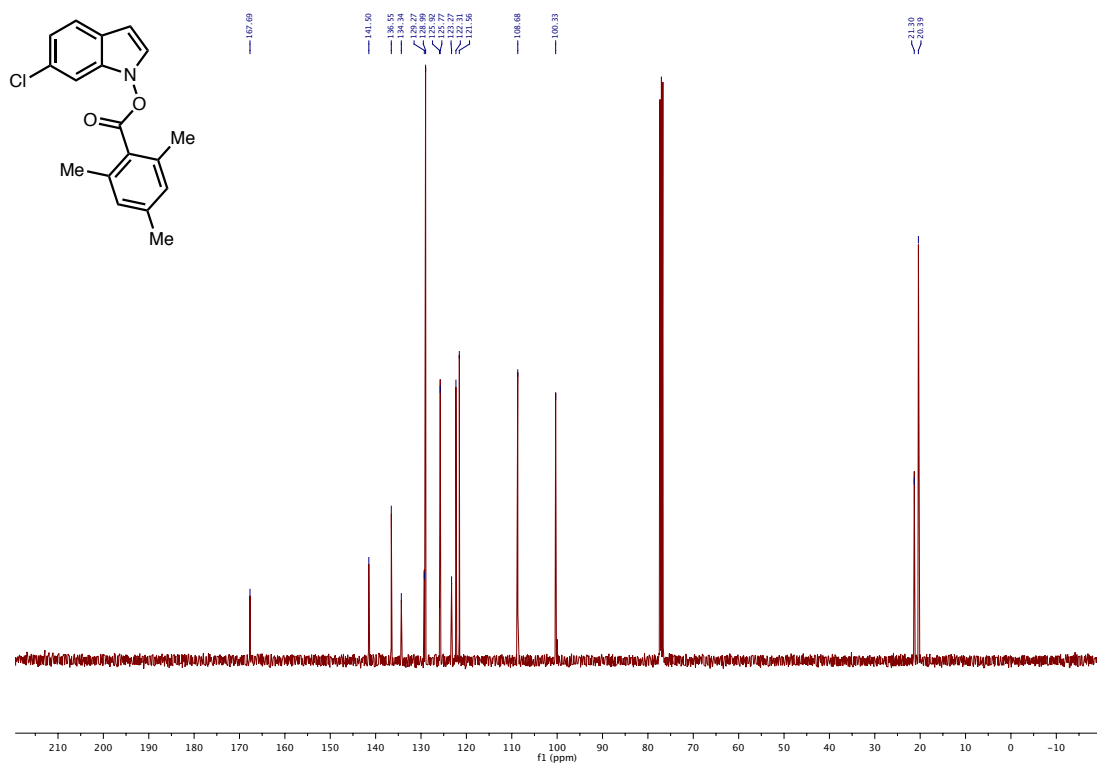

### 3-(2-methoxyethyl)-1H-indol-1-yl 2,4,6-trimethylbenzoate (2k)

$^1\text{H}$  NMR, 400 MHz,  $\text{CDCl}_3$

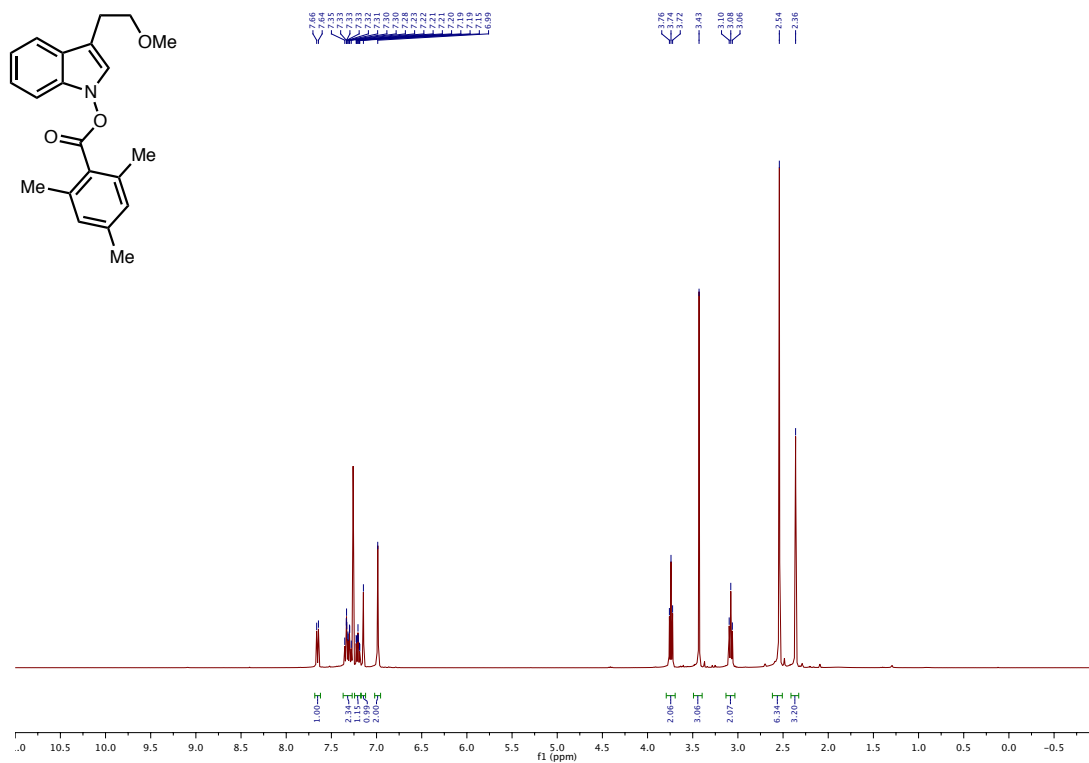

$^{13}\text{C}$  NMR, 101 MHz,  $\text{CDCl}_3$

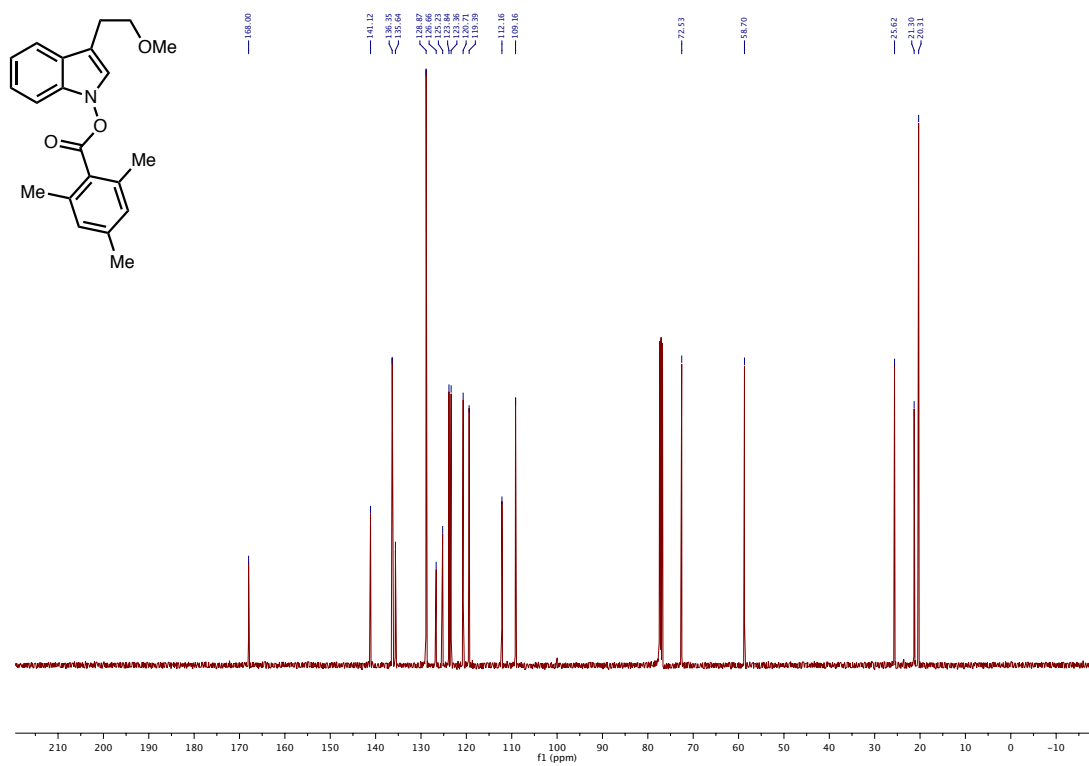



**(E)-N-(4-methoxybenzyl)-N-methyl-3-phenylprop-2-en-1-amine (1s)**

<sup>1</sup>H NMR, 400 MHz, CDCl<sub>3</sub>

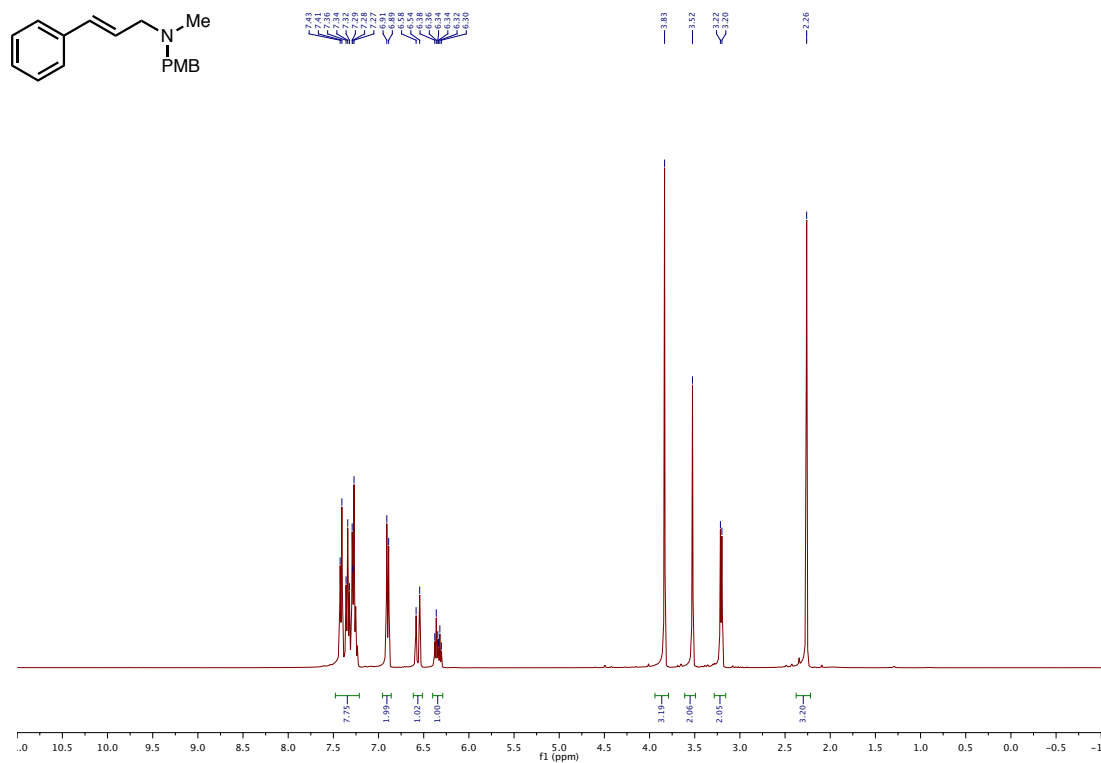

<sup>13</sup>C NMR, 101 MHz, CDCl<sub>3</sub>

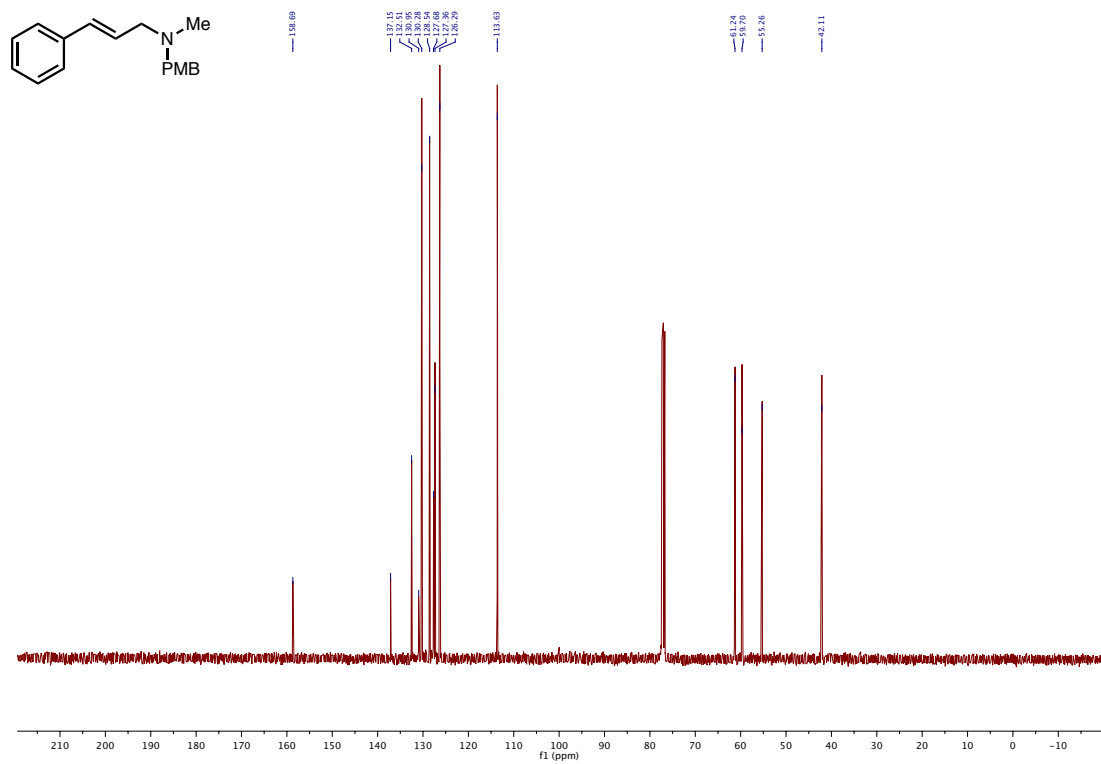



# 1-allyl-2-fluoro-4-methoxybenzene (1v)

$^1\text{H}$  NMR, 400 MHz,  $\text{CDCl}_3$

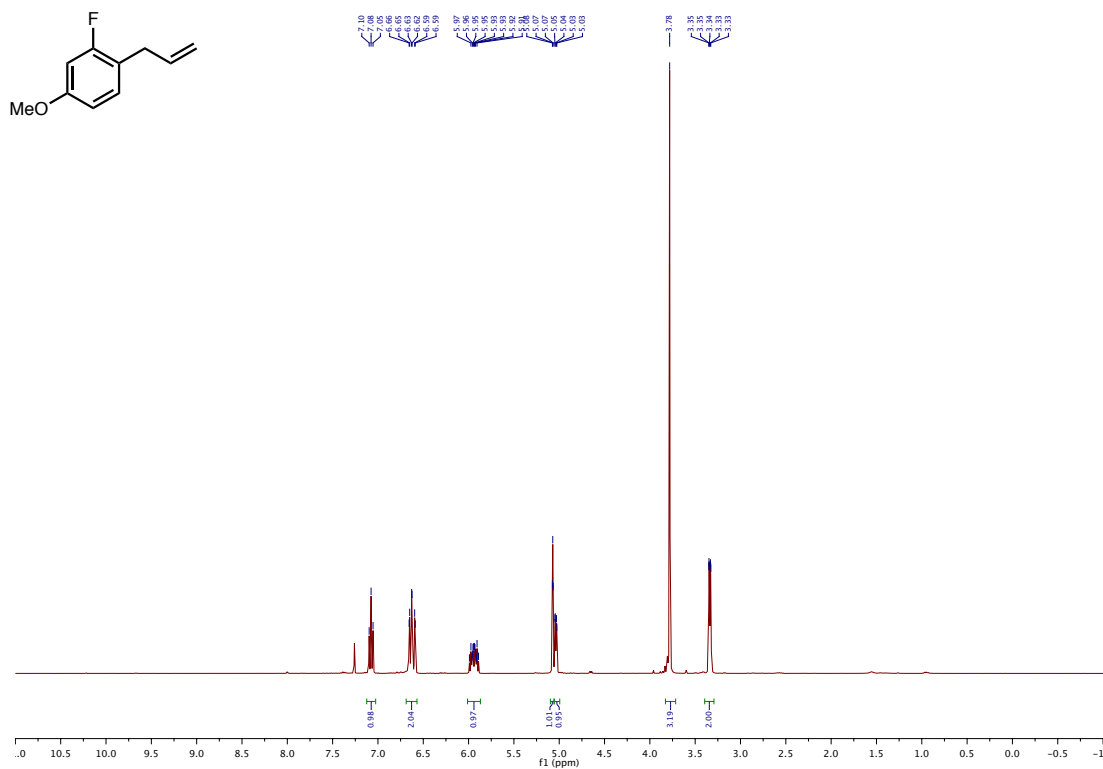

$^{13}\text{C}$  NMR, 101 MHz,  $\text{CDCl}_3$

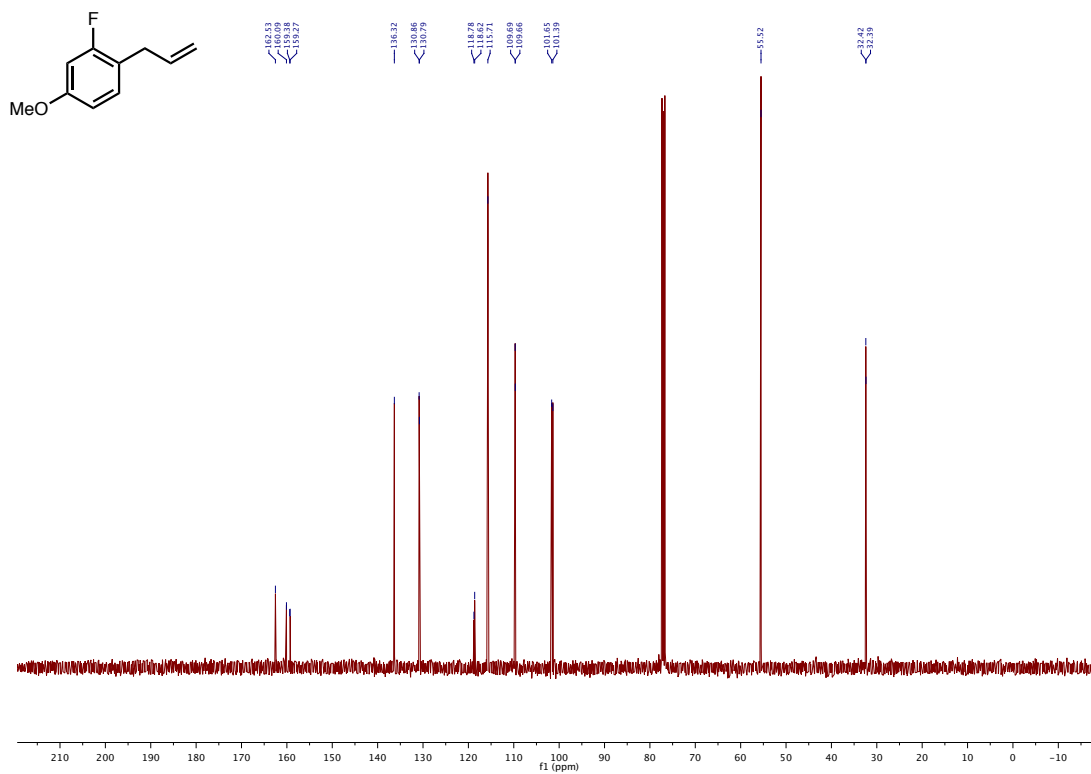

$^{19}\text{F}$  NMR, 376 MHz,  $\text{CDCl}_3$

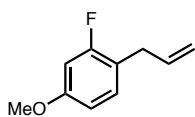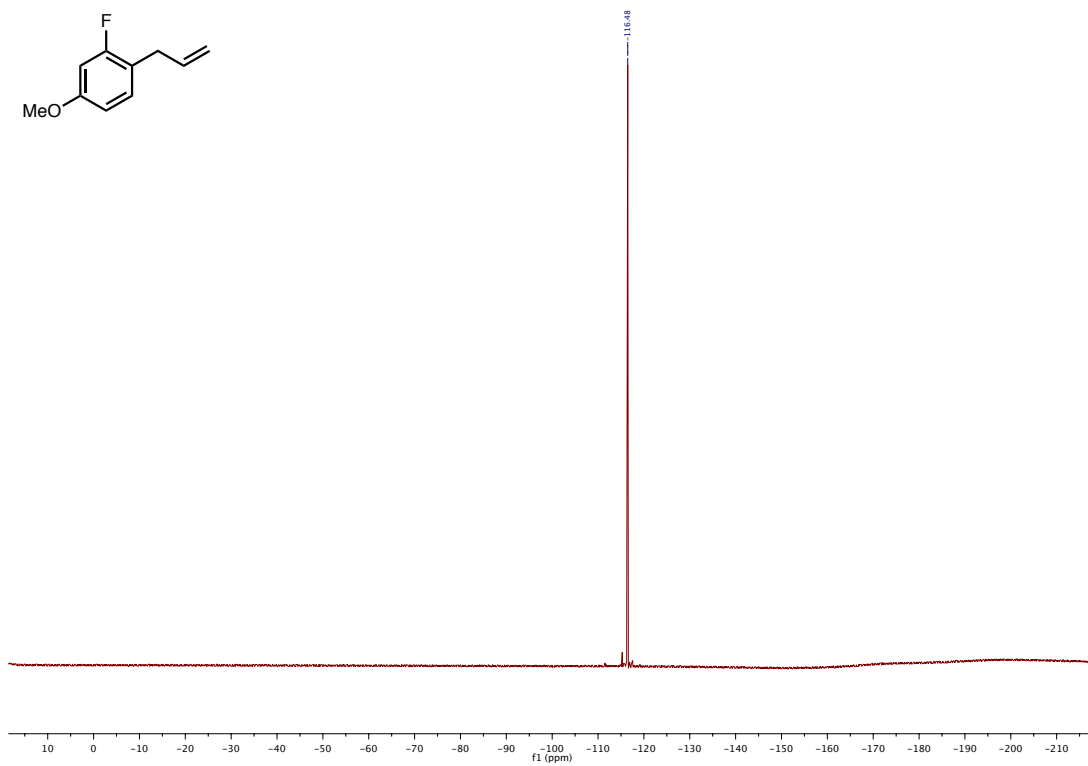

## IX. SFC/HPLC Traces

### (S)-1-(1-phenylethyl)-1H-indole (3a)

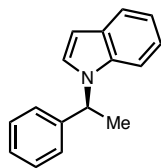

#### Racemic 3a:

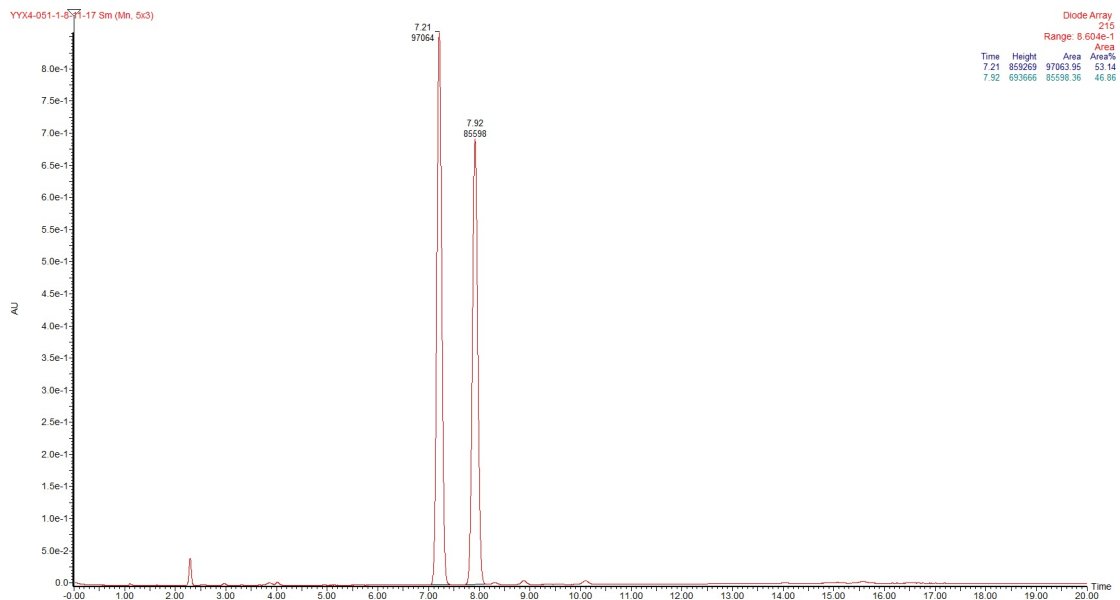

#### Enantioenriched 3a:

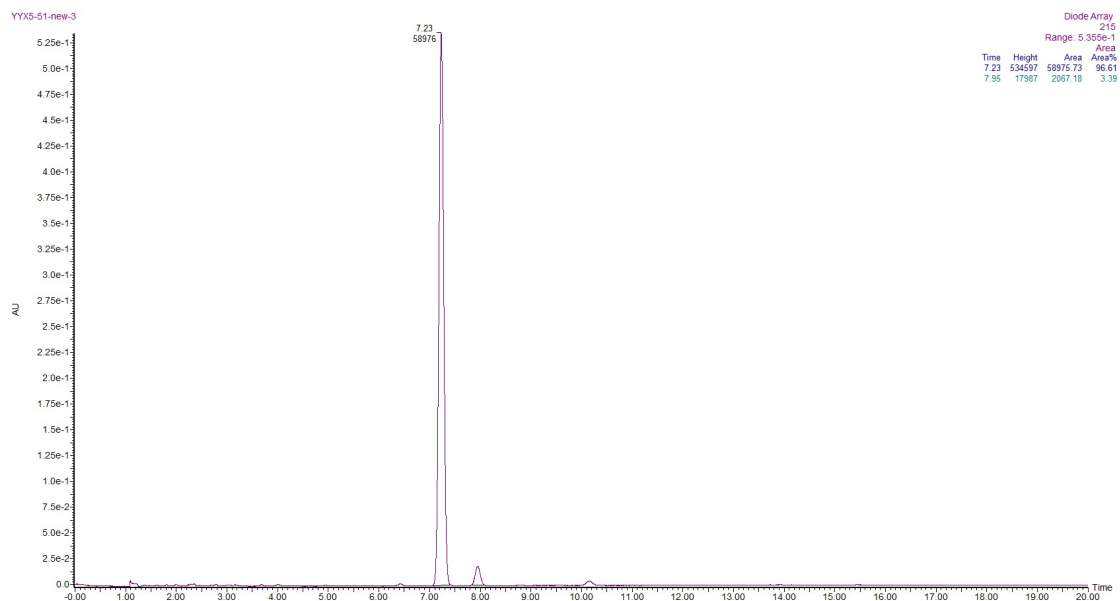

### (S)-1-(1-(*o*-tolyl)ethyl)-1*H*-indole (3b)

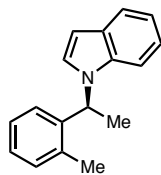

### Racemic 3b:

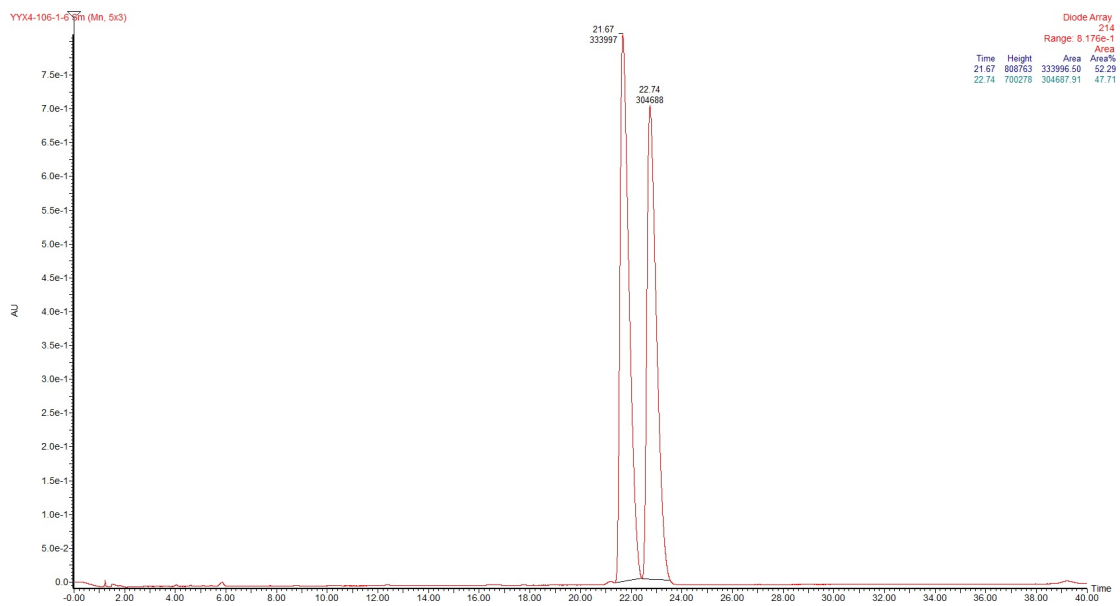

### Enantioenriched 3b:

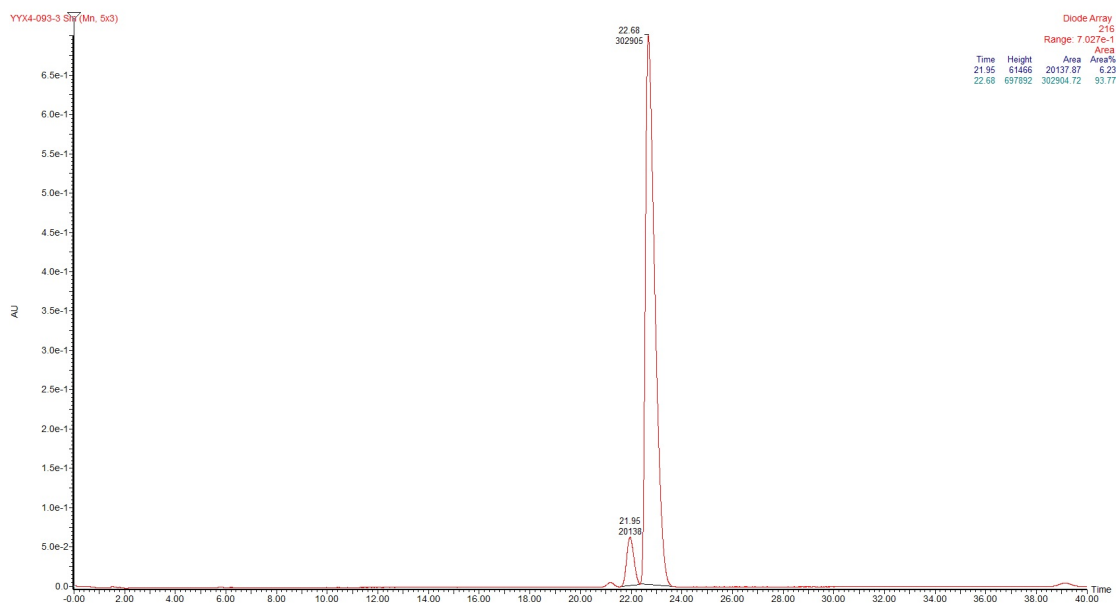

### (S)-1-(1-(3-methoxyphenyl)ethyl)-1H-indole (3c)

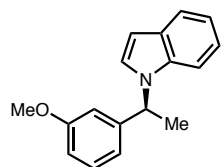

### Racemic 3c:

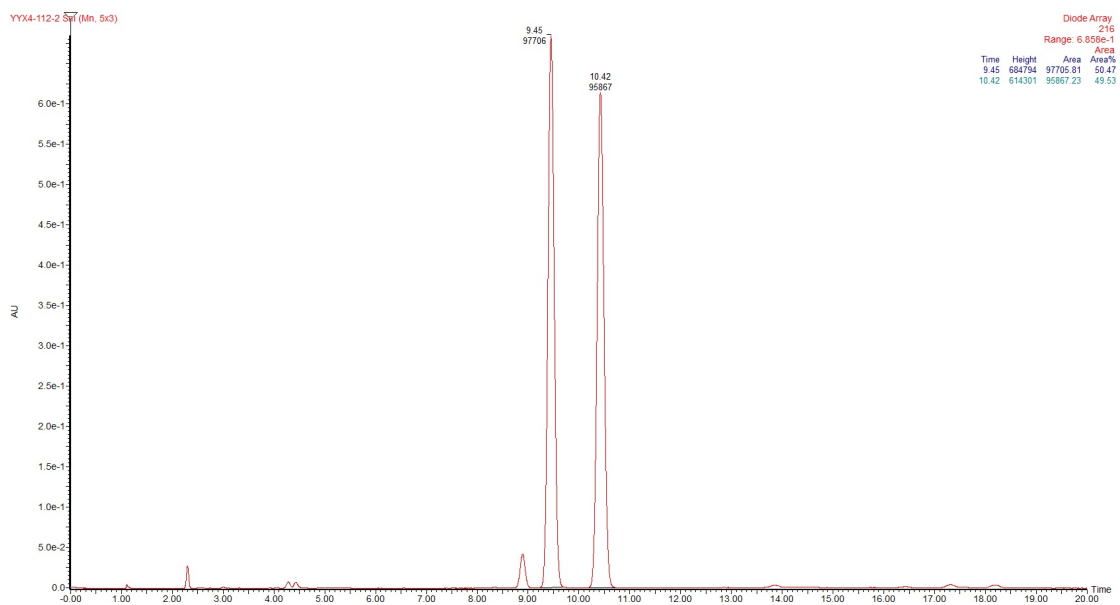

### Enantioenriched 3c:

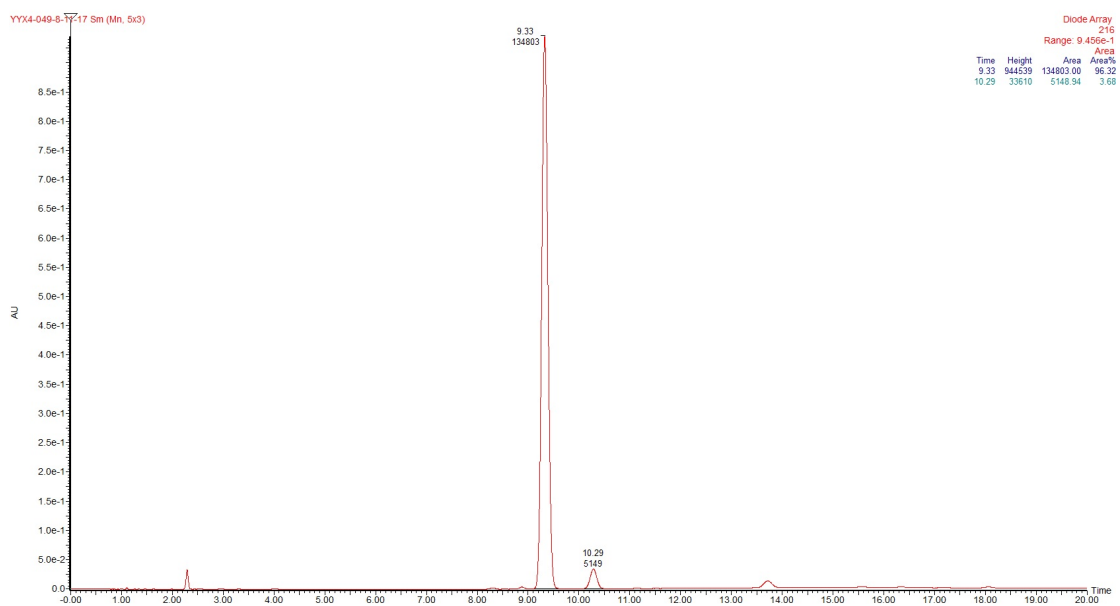

### (S)-1-(1-(4-fluorophenyl)ethyl)-1H-indole (3e)

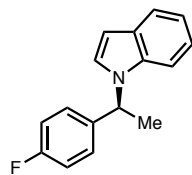

### Racemic 3e:

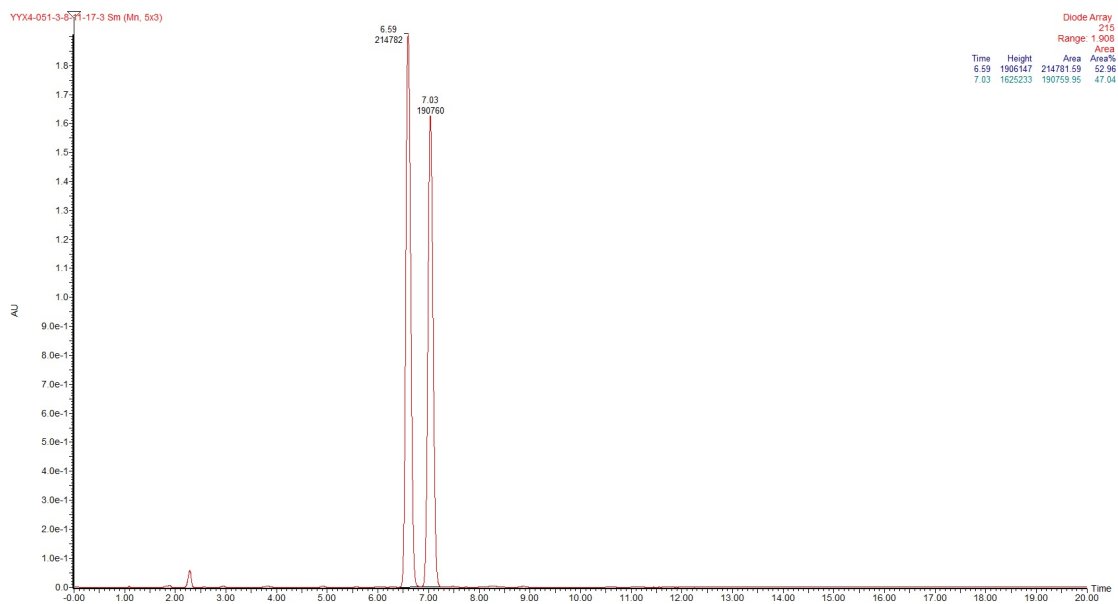

### Enantioenriched 3e:

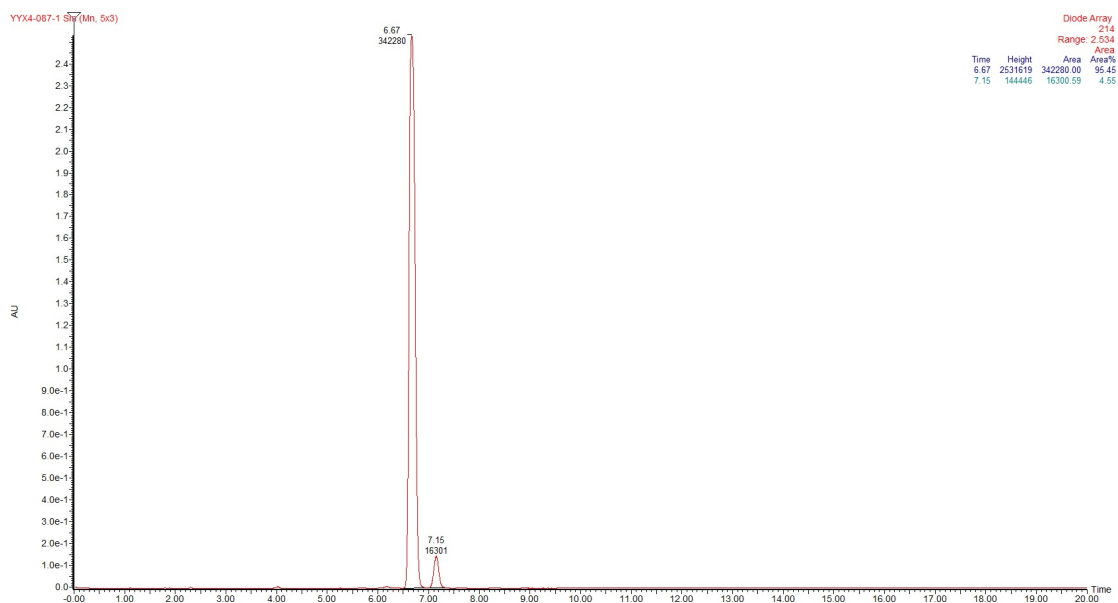

### (S)-5-(1-(1*H*-indol-1-yl)ethyl)-1-tosyl-1*H*-indole (3f)

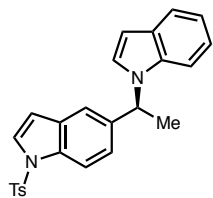

### Racemic 3f:

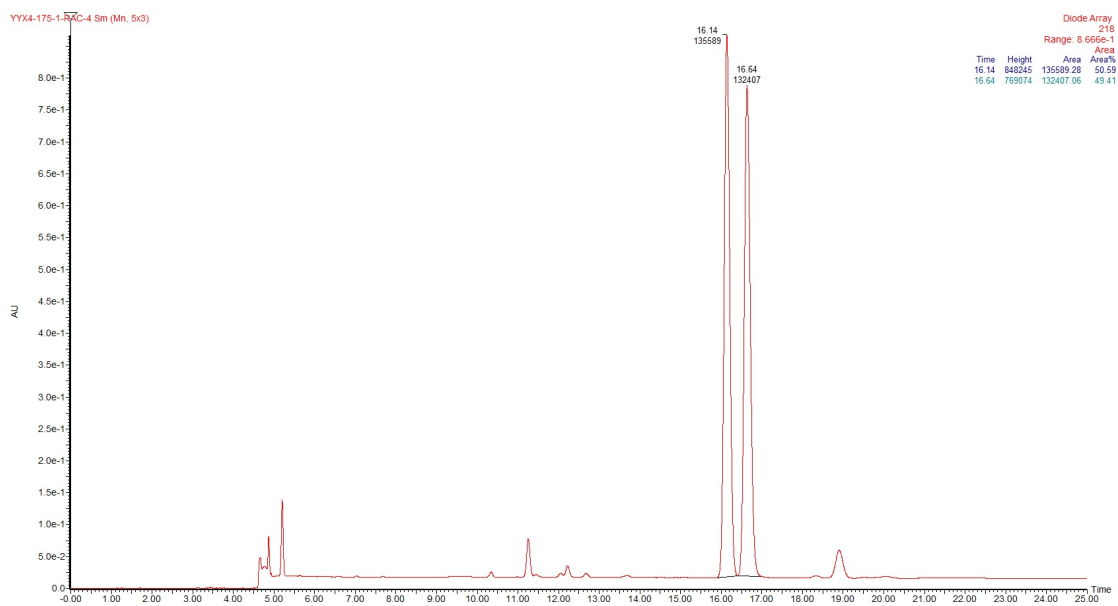

### Enantioenriched 3f:

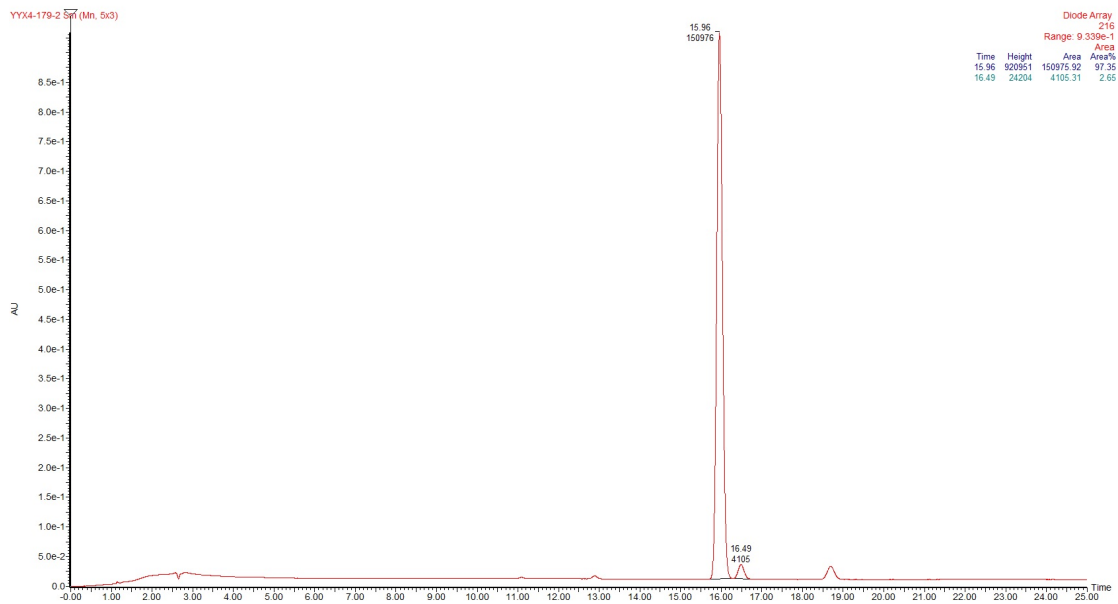

***tert*-butyl (*S*)-4-(1*H*-indol-1-yl)-4-phenylbutanoate (**3g**)**

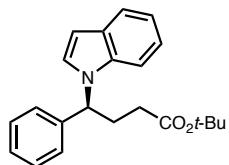

**Racemic **3g**:**

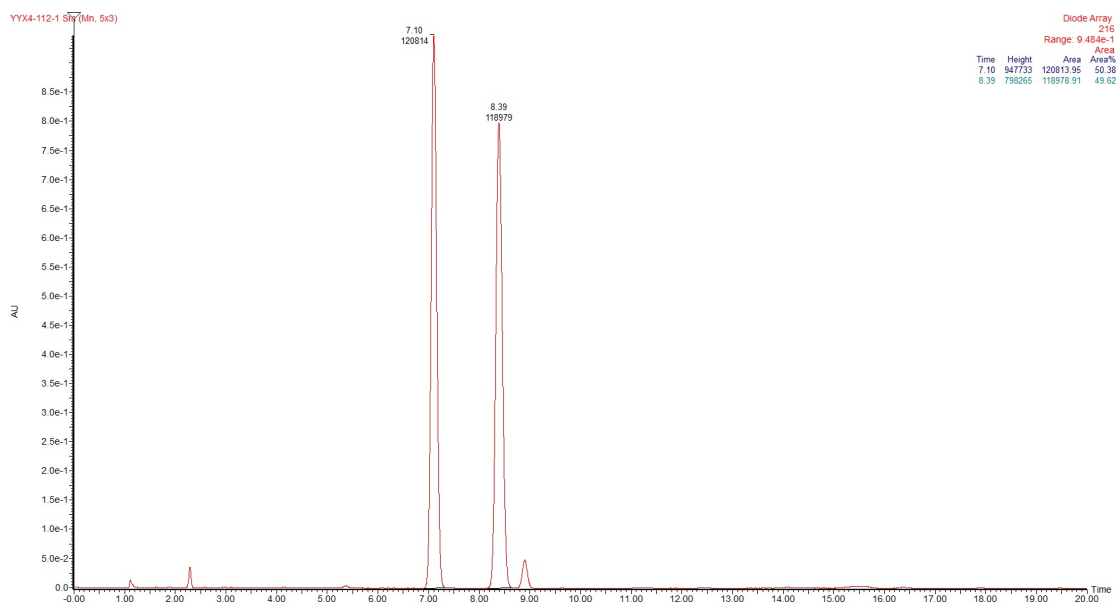

**Enantioenriched **3g**:**

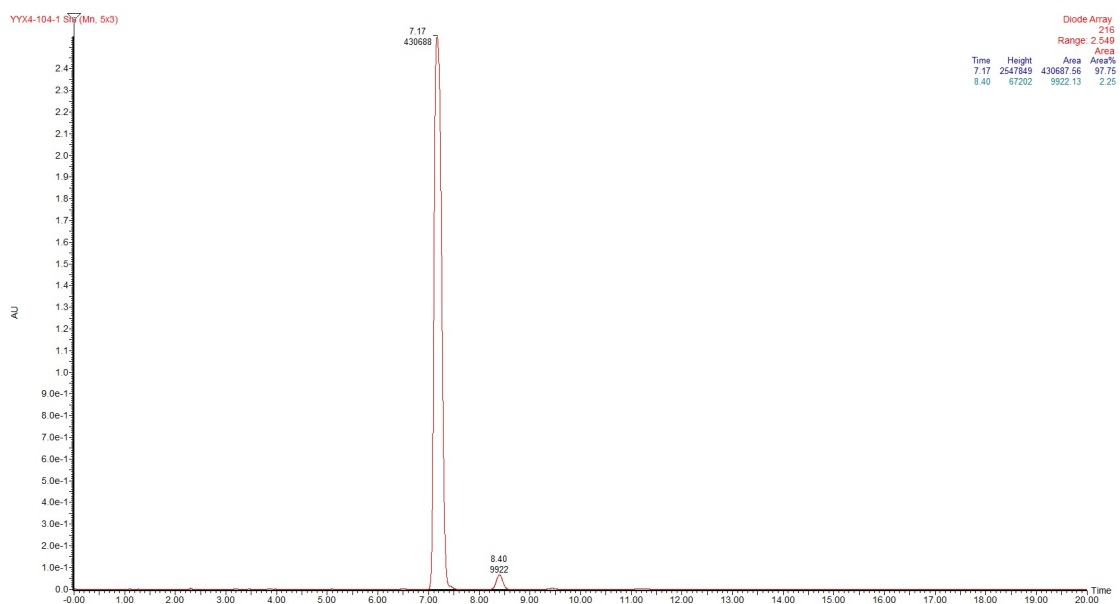



# (S)-N-(3-(1*H*-indol-1-yl)-3-phenylpropyl)-*N*-methylpivalamide (3h)

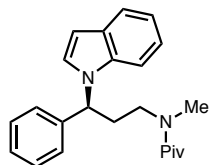

## Racemic 3h:

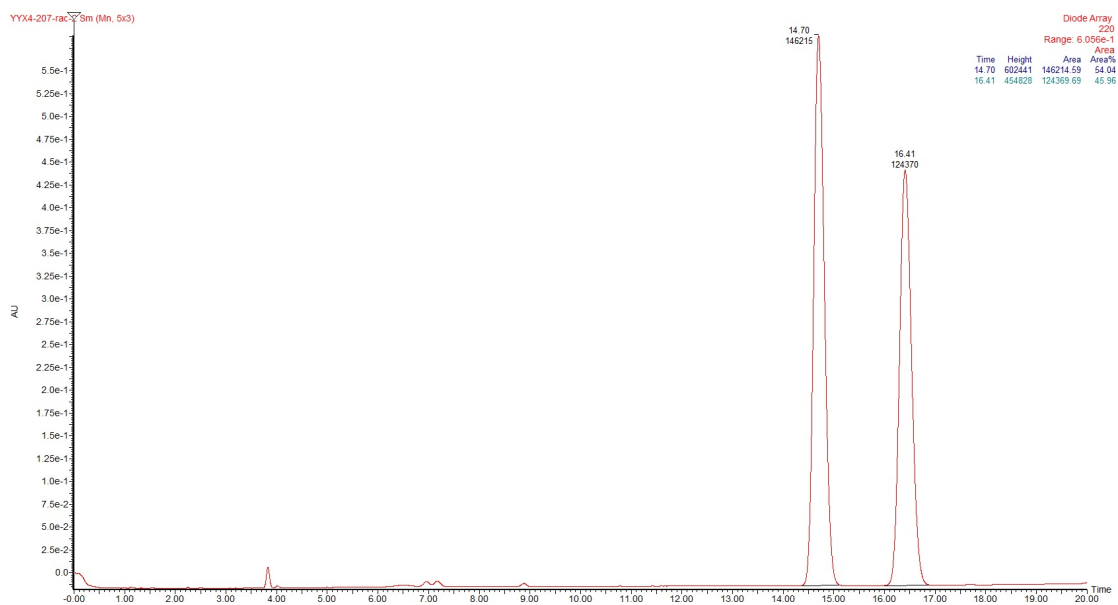

## Enantioenriched 3h:

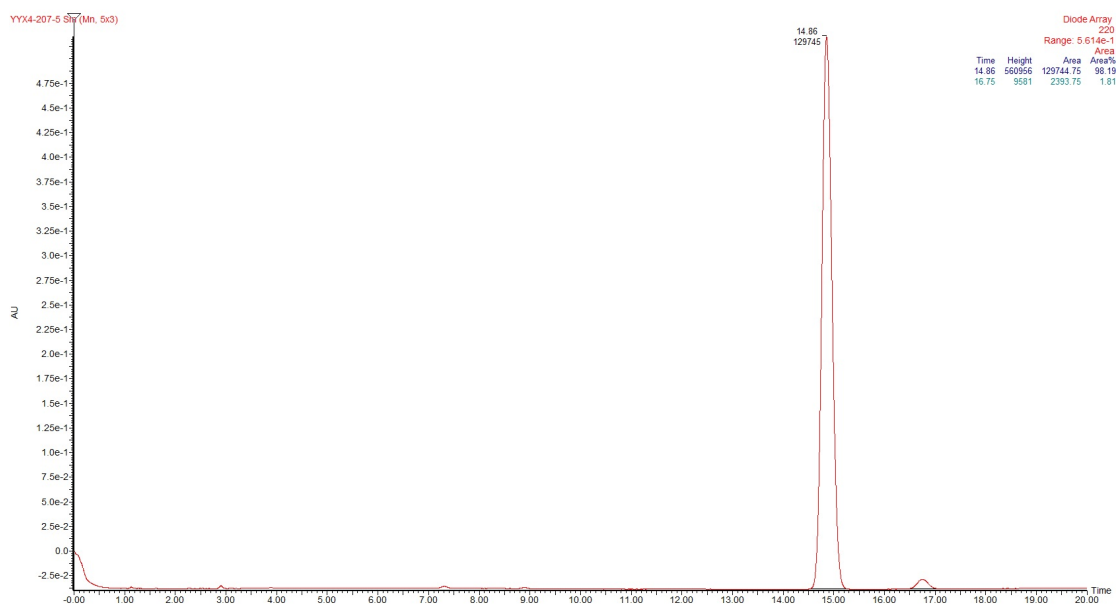

# *N*-((2*S*,3*S*)-3-(1*H*-indol-1-yl)-2-methyl-3-phenylpropyl)-*N*,4-dimethylbenzenesulfonamide

(3i)

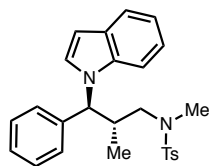

Racemic **3i**:

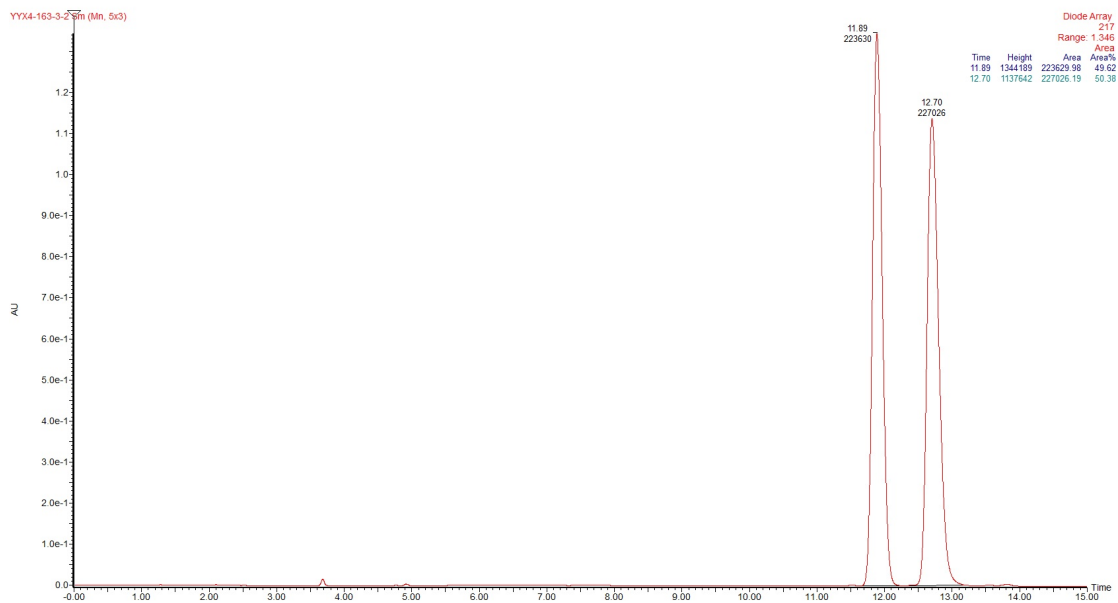

Enantioenriched **3i**:

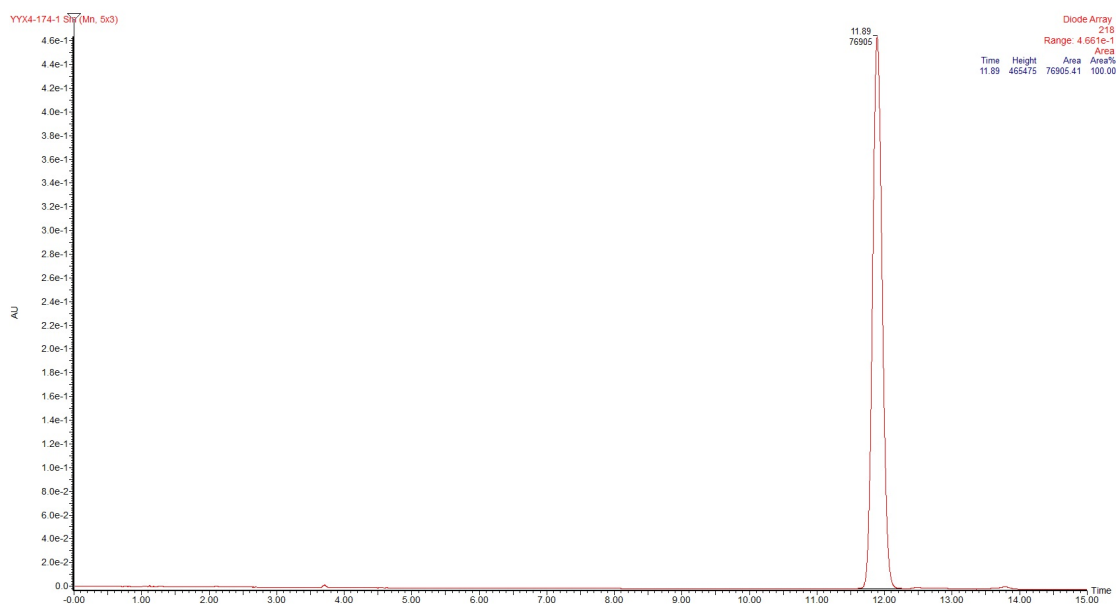

### (S)-N,N-diethyl-3-(1-(6-(trifluoromethyl)-1H-indol-1-yl)ethyl)benzamide (3j)

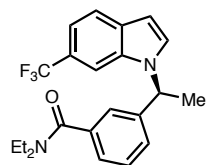

#### Racemic 3j:

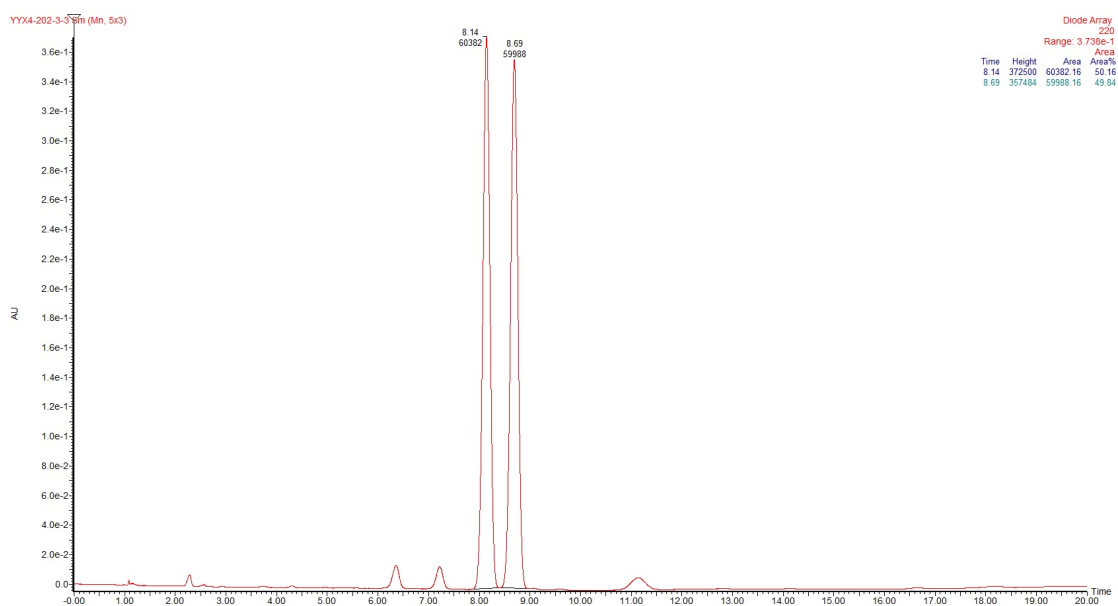

#### Enantioenriched 3j:

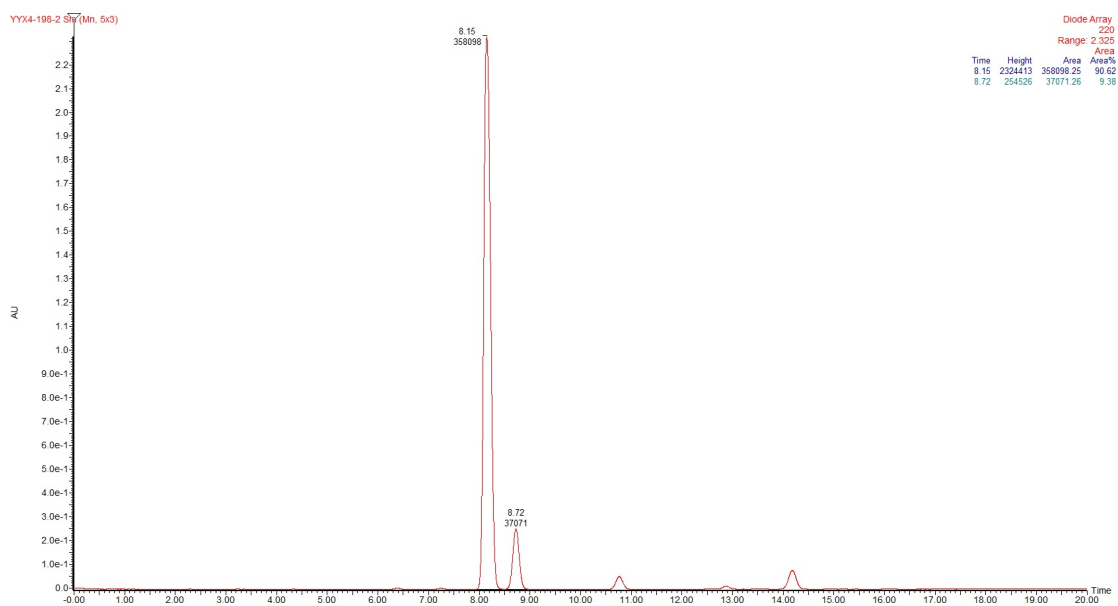

# *tert*-butyl (*S*)-1-(1-(2-(difluoromethoxy)phenyl)ethyl)-1*H*-indole-4-carboxylate (**3k**)

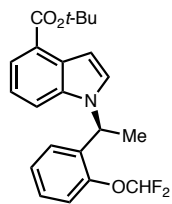

## Racemic **3k**:

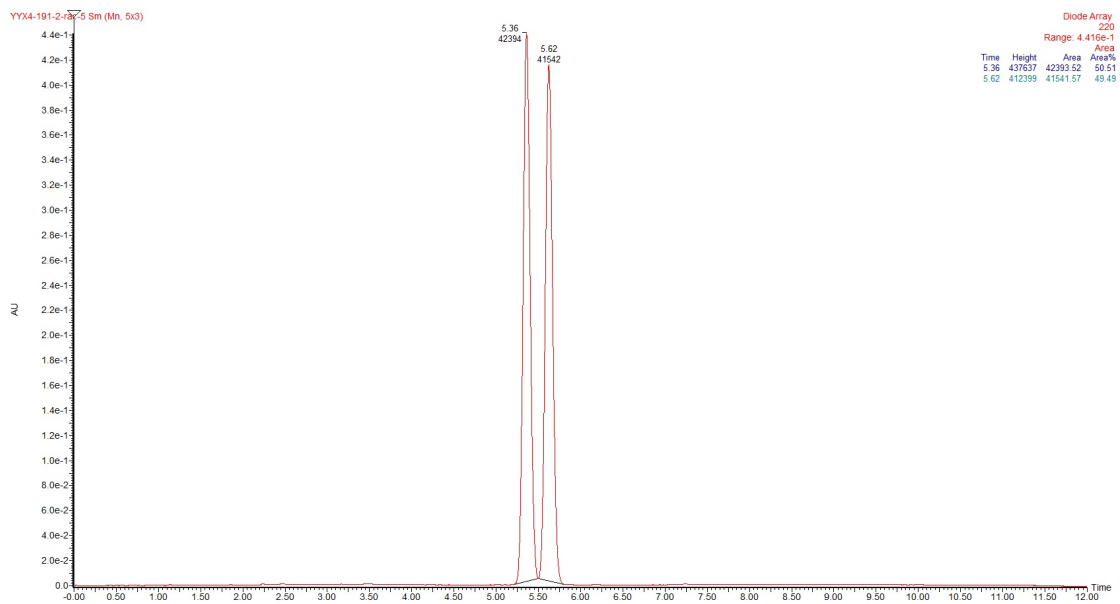

## Enantioenriched **3k**:

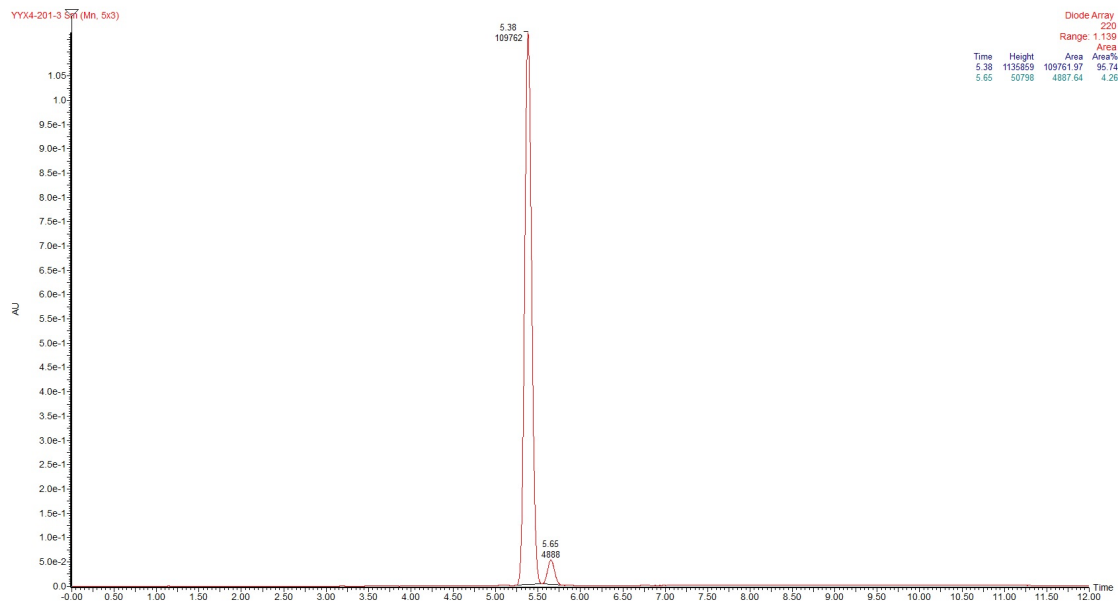

### (S)-1-(1-(3-chlorophenyl)ethyl)-2-methyl-1H-indole (3I)

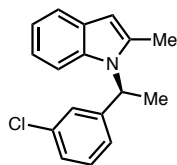

### Racemic 3I:

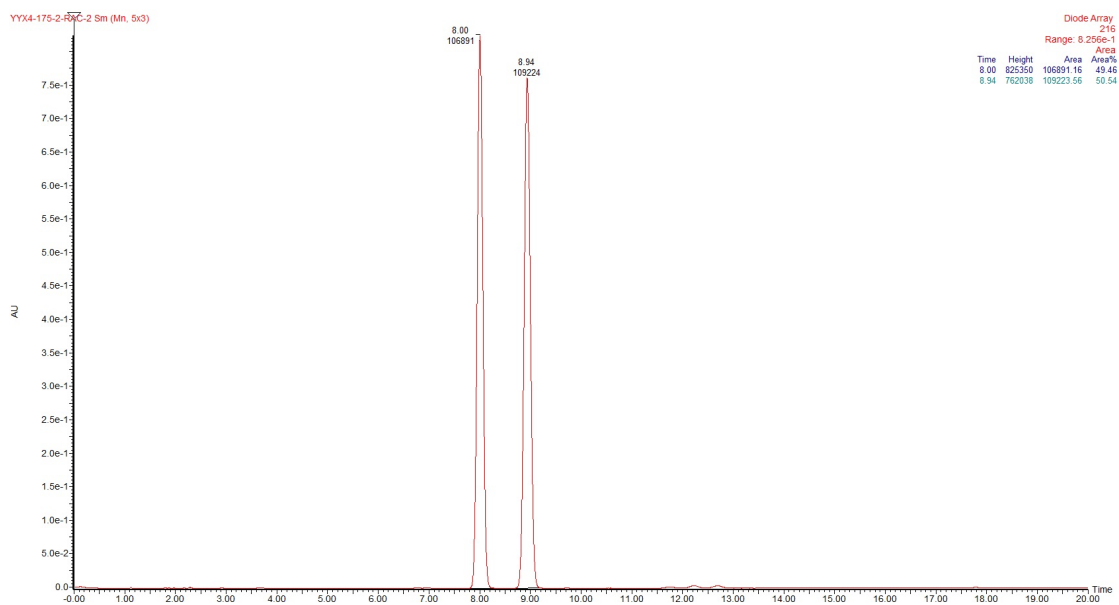

### Enantioenriched 3I:

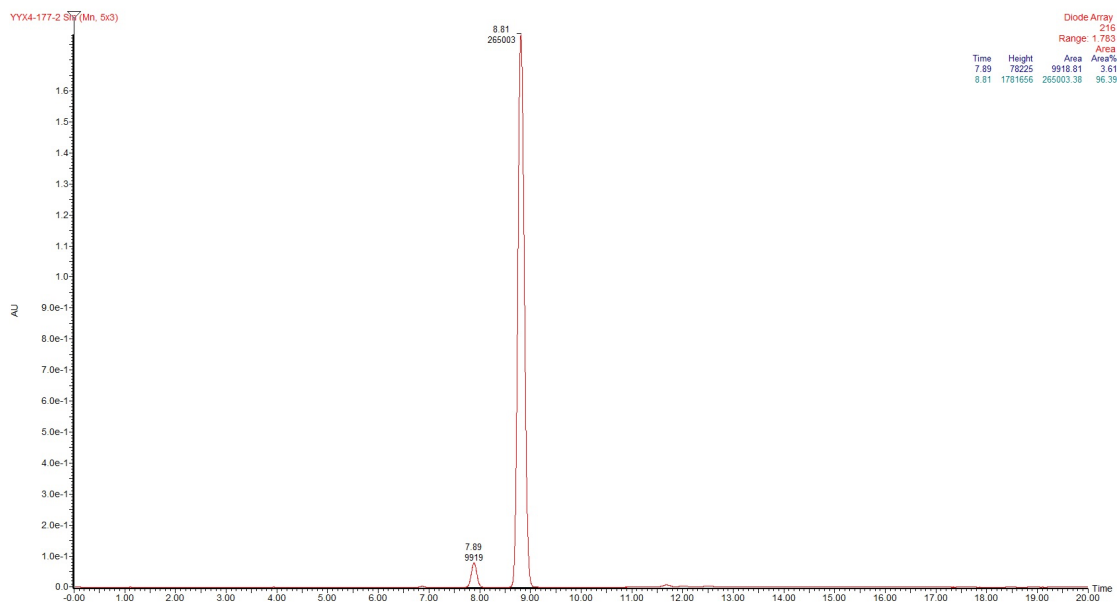

### methyl (*S*)-1-(1-phenylethyl)-1*H*-indole-2-carboxylate (**3m**)

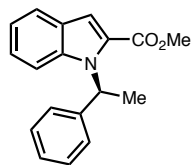

### Racemic **3m**:

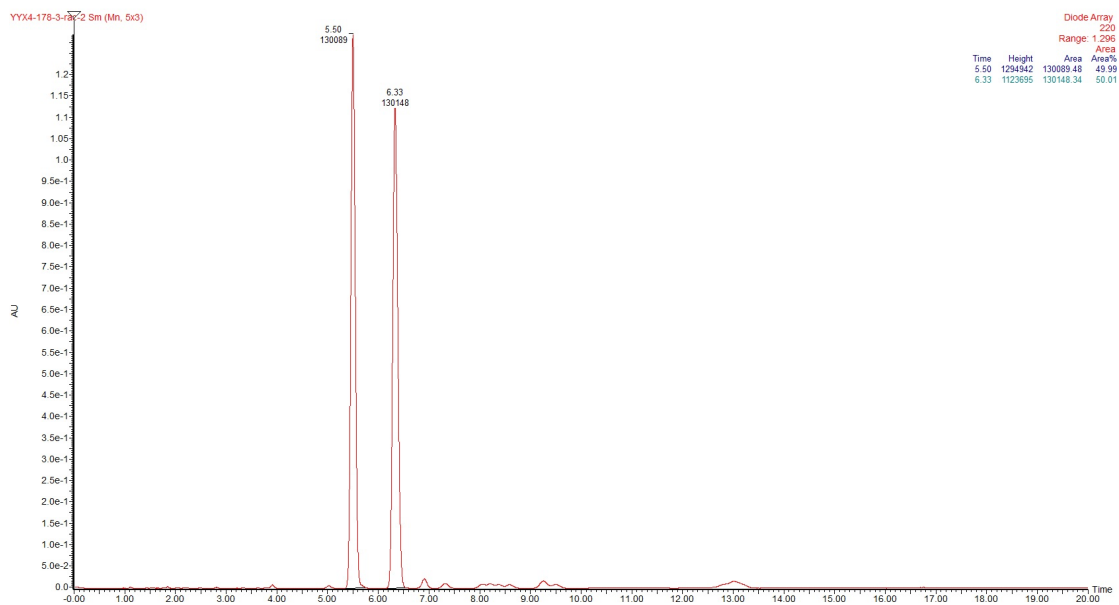

### Enantioenriched **3m**:

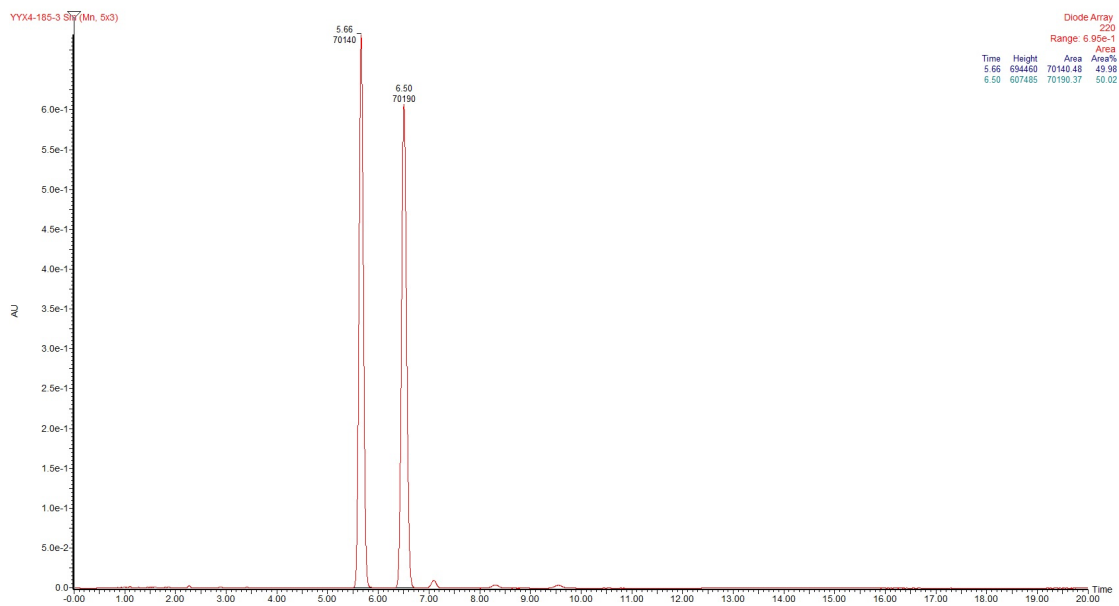

### (S)-3-(2-methoxyethyl)-1-(1-(4-(trifluoromethyl)phenyl)ethyl)-1H-indole (3n)

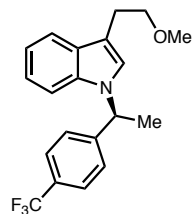

### Racemic 3n:

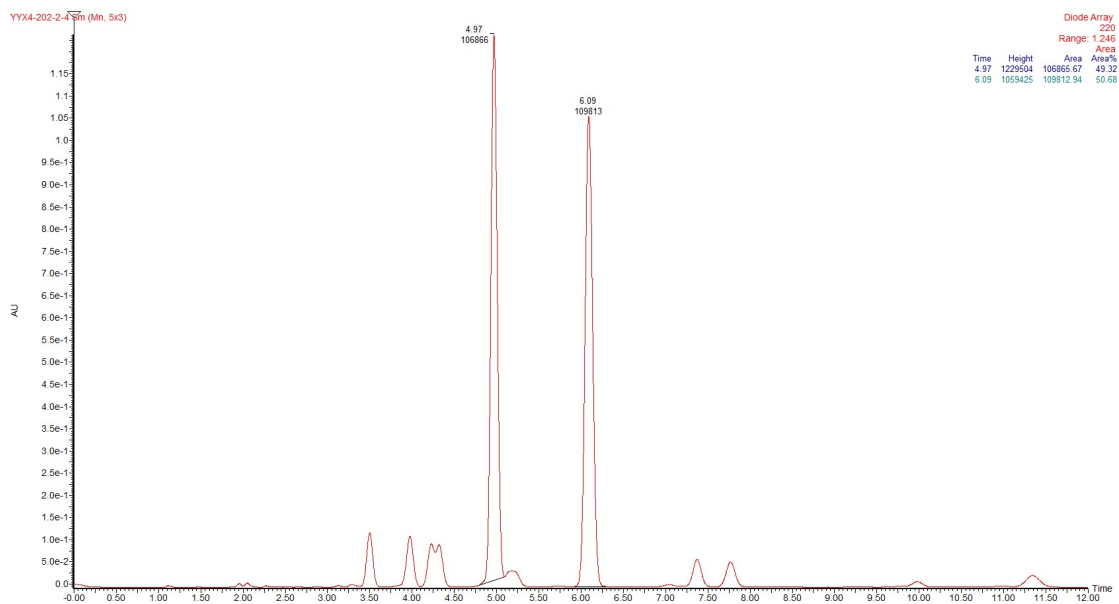

### Enantioenriched 3n:

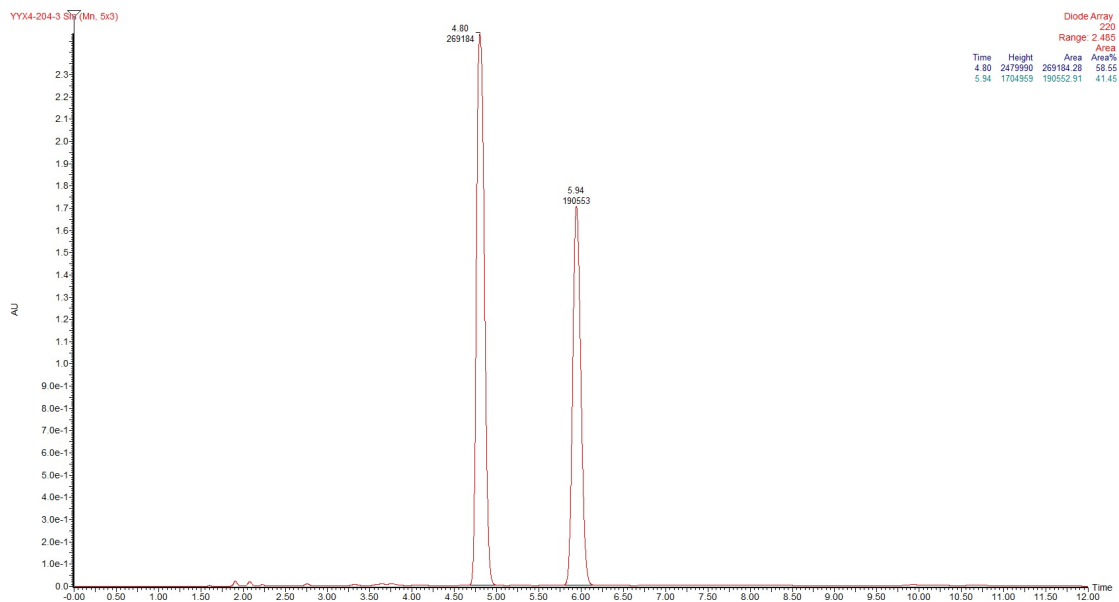

### (S)-3-(1H-indol-1-yl)-N-methyl-3-phenylpropan-1-amine (3t)

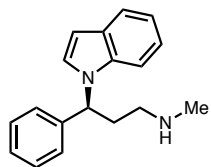

### Racemic 3t:

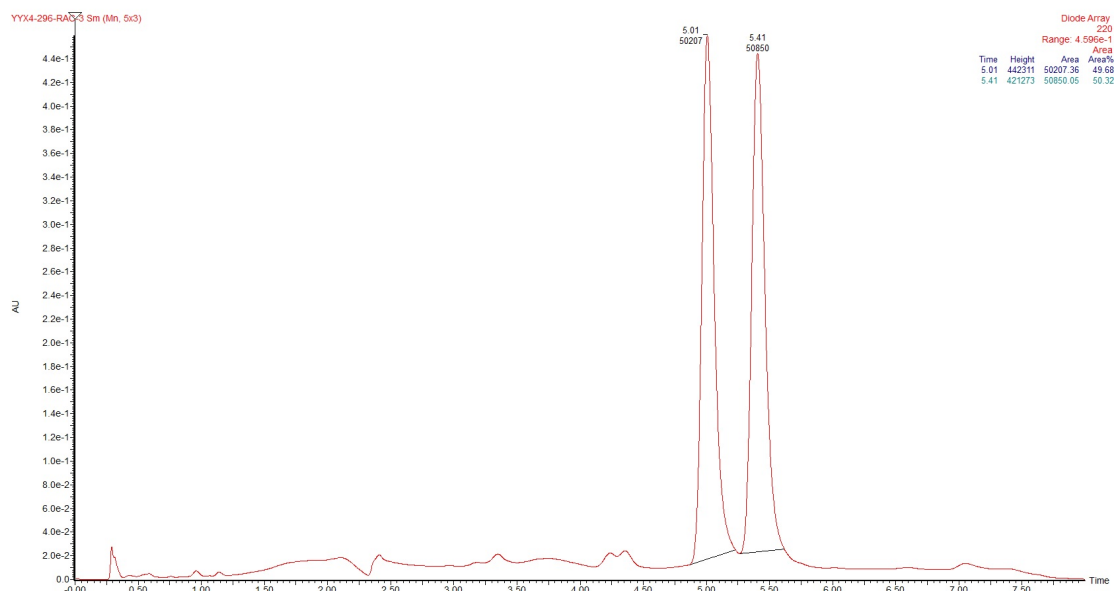

### Enantioenriched 3t:

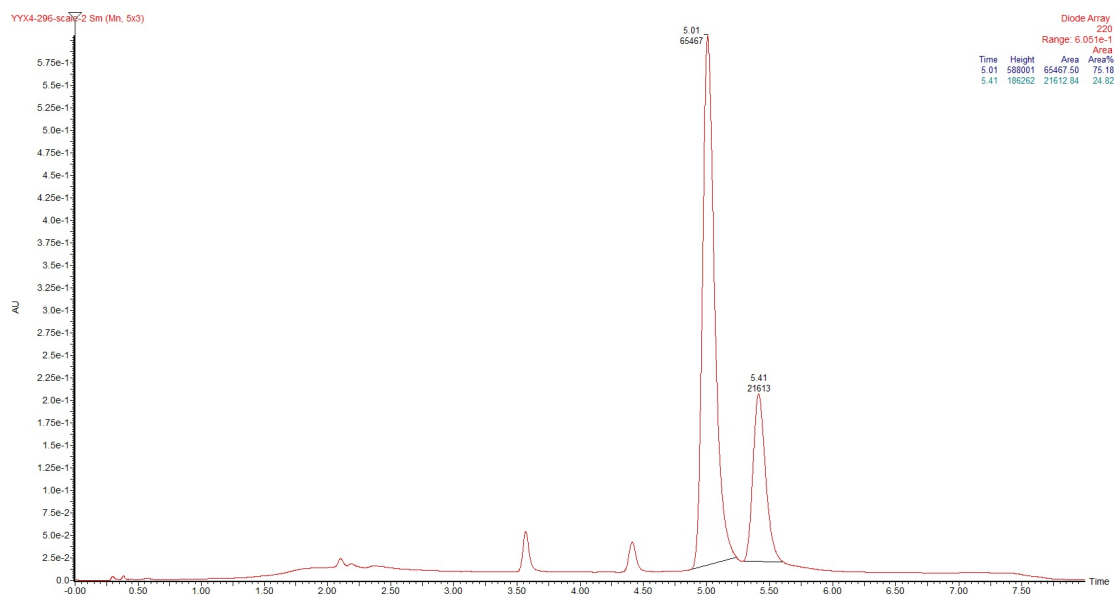



### (S)-3-(1-phenylethyl)-1H-indole (4a)

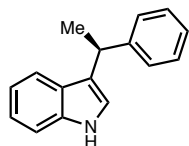

### Racemic 4a:

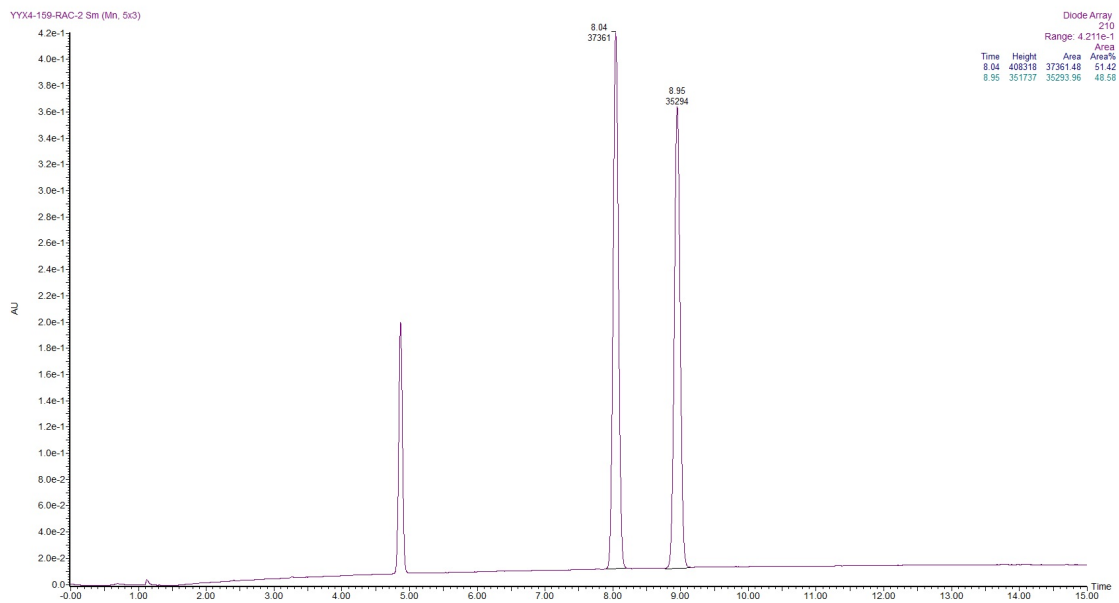

### Enantioenriched 4a:

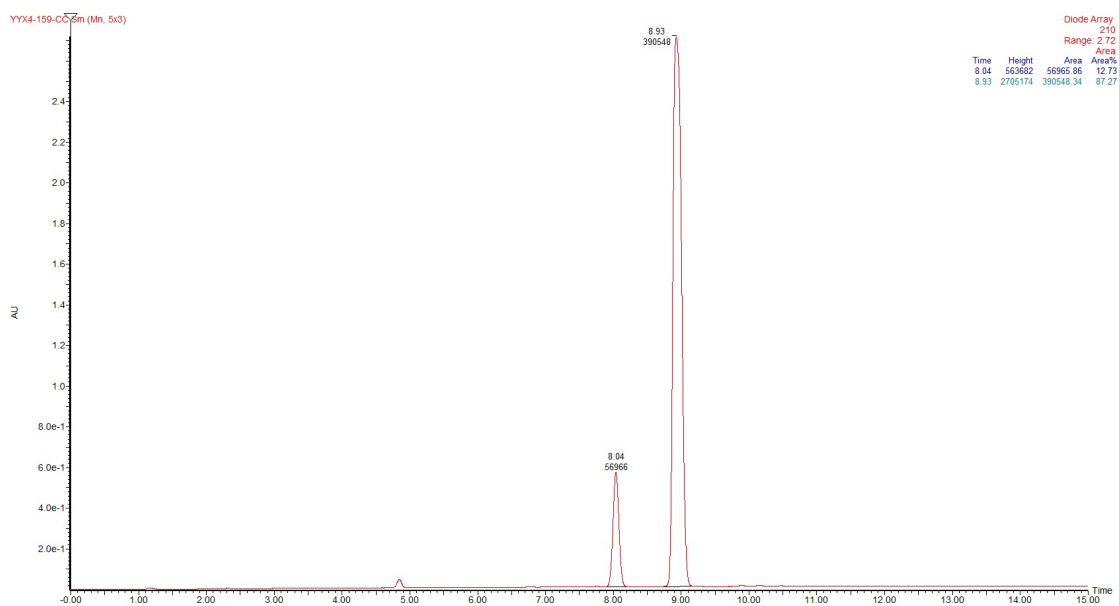

### (S)-3-(1-(4-(trifluoromethyl)phenyl)ethyl)-1H-indole (4b)

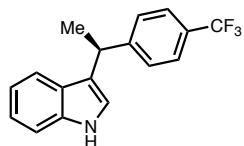

#### Racemic 4b:

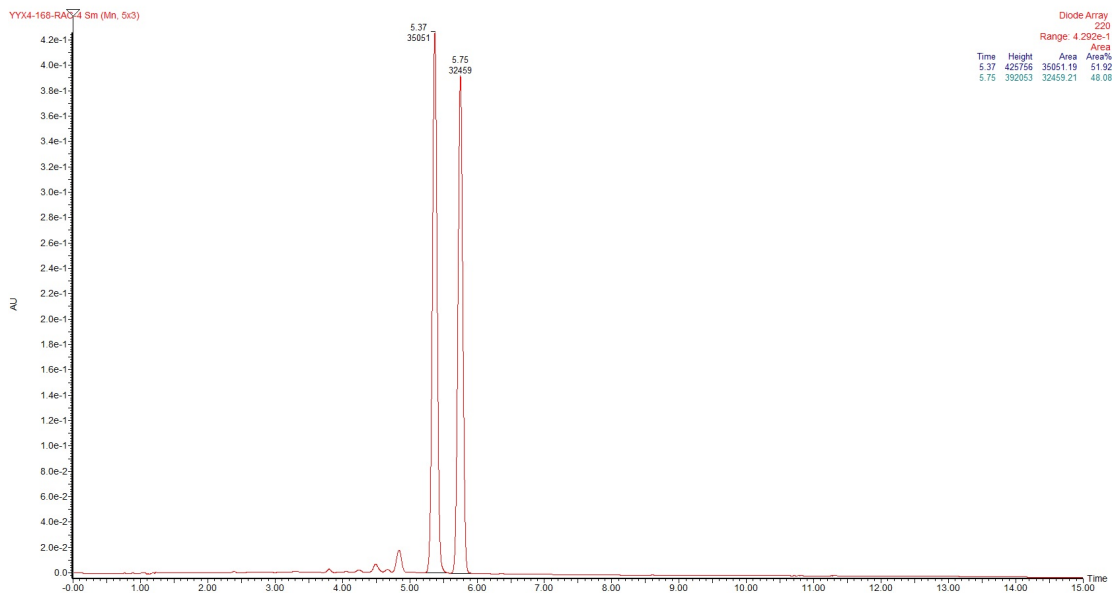

#### Enantioenriched 4b:

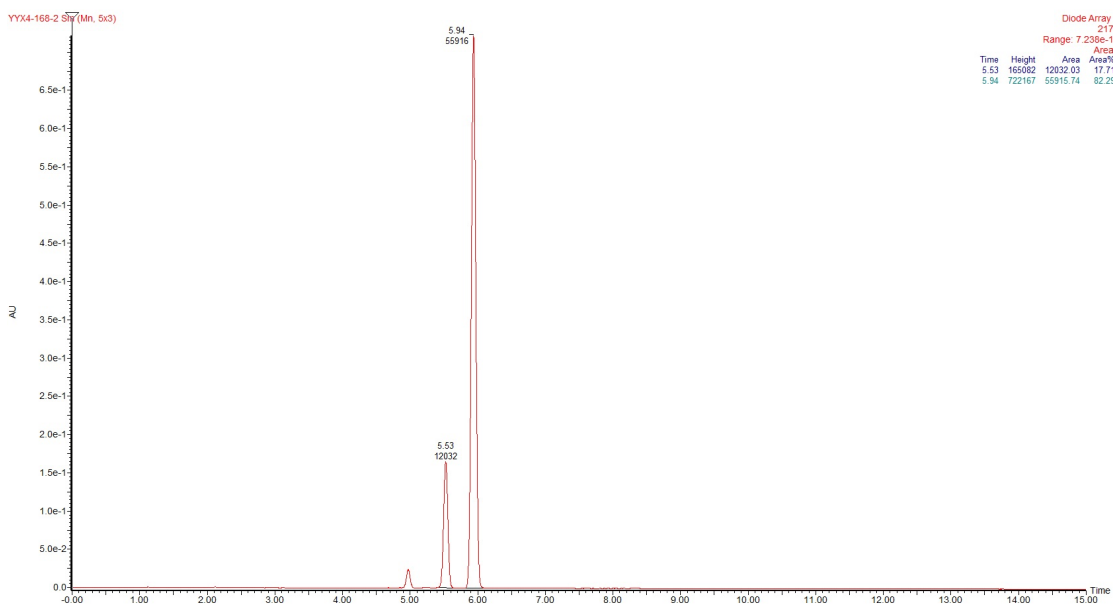

### (S)-5-(1-(1*H*-indol-3-yl)ethyl)-1-tosyl-1*H*-indole (4c)

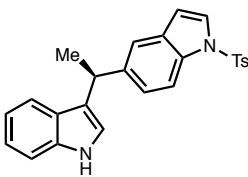

### Racemic 4c:

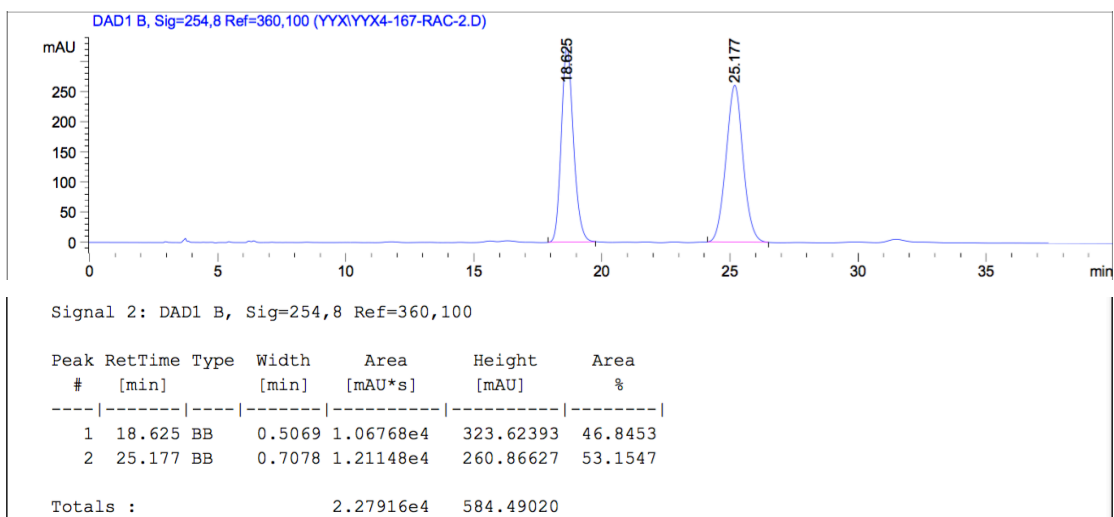

### Enantioenriched 4c:

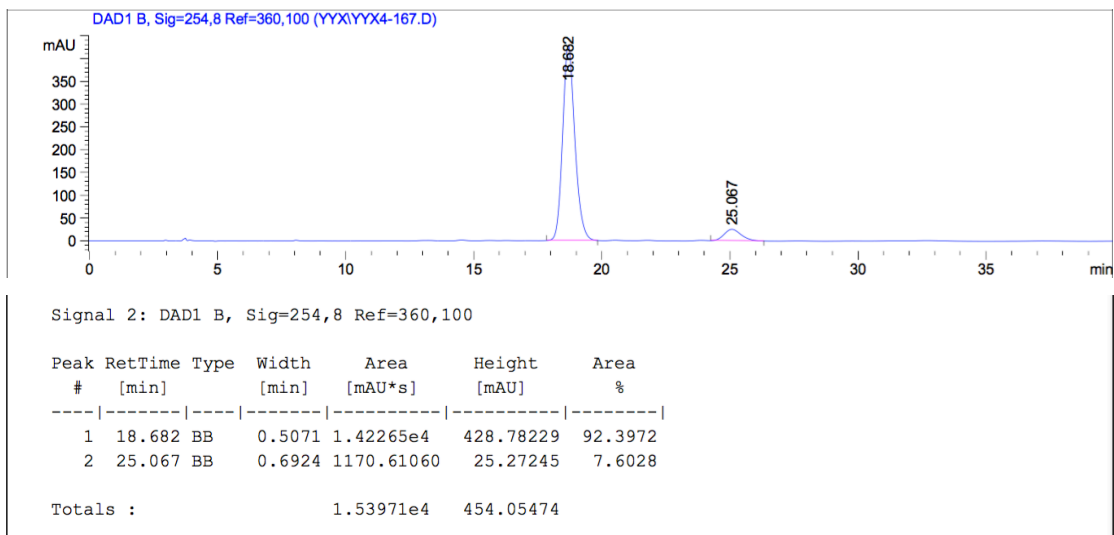

# (S)-3-(1H-indol-3-yl)-N-(4-methoxybenzyl)-N-methyl-3-phenylpropan-1-amine (4d)

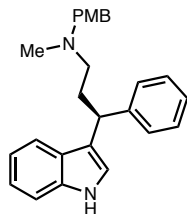

## Racemic 4d:

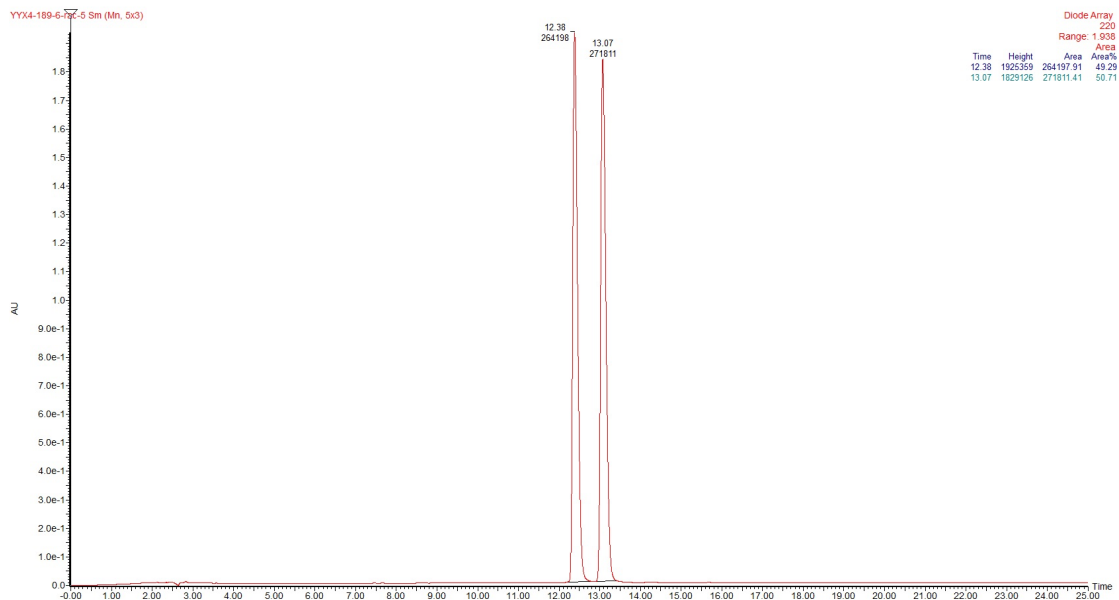

## Enantioenriched 4d:

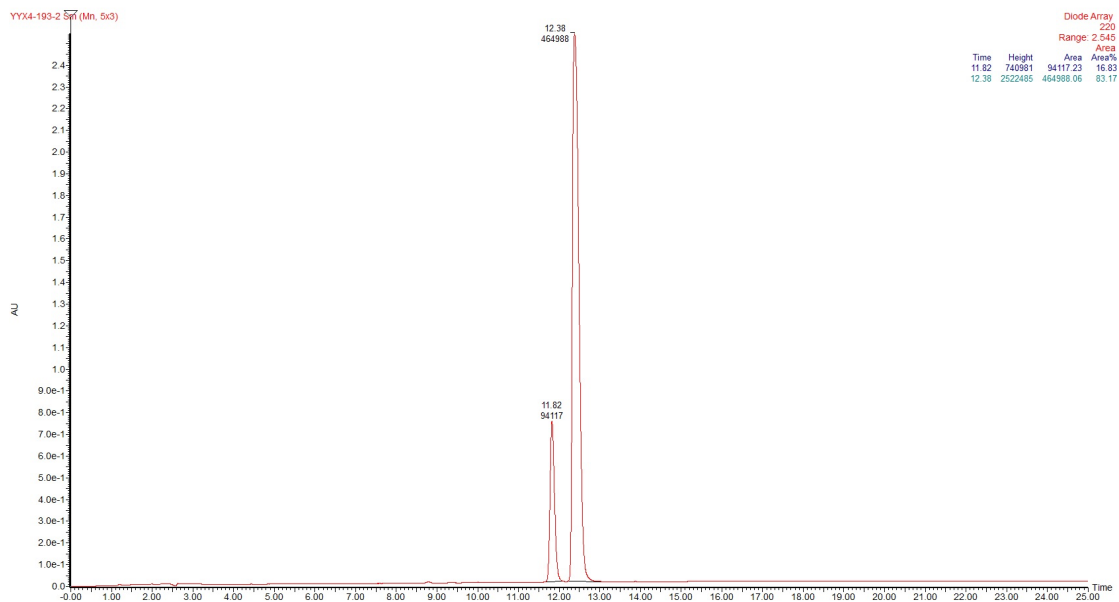

**3-((*S*)-1-((*8R,9S,13S,14S*)-13-methyl-6,7,8,9,11,12,13,14,15,16-decahydrospiro[cyclopenta[*a*]phenanthrene-17,2'-[1,3]dioxolan]-2-yl)ethyl)-1*H*-indole (4e)**

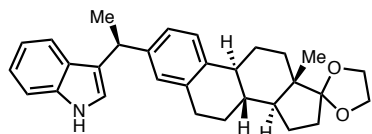

**Racemic 4e:**

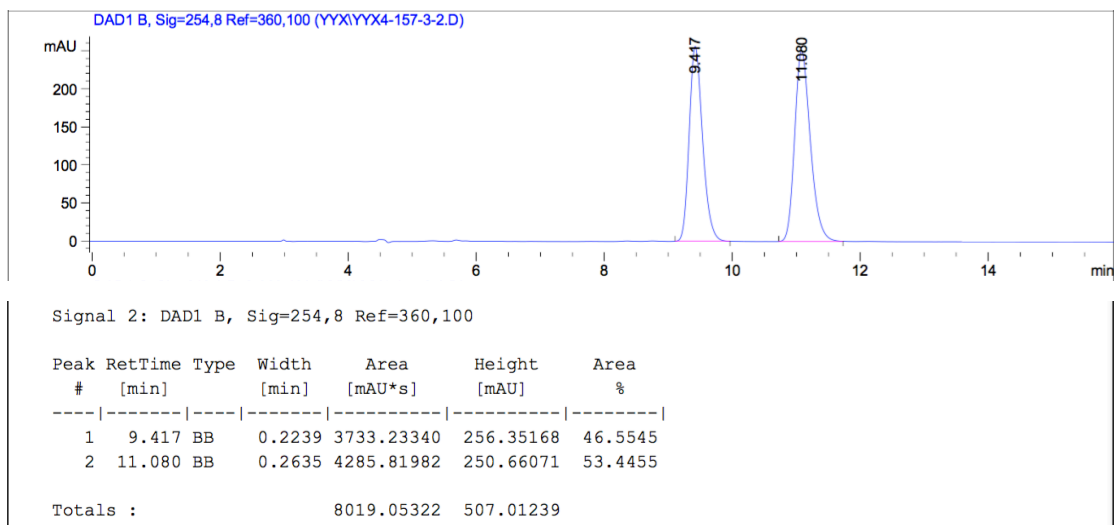

**Enantioenriched 4e:**

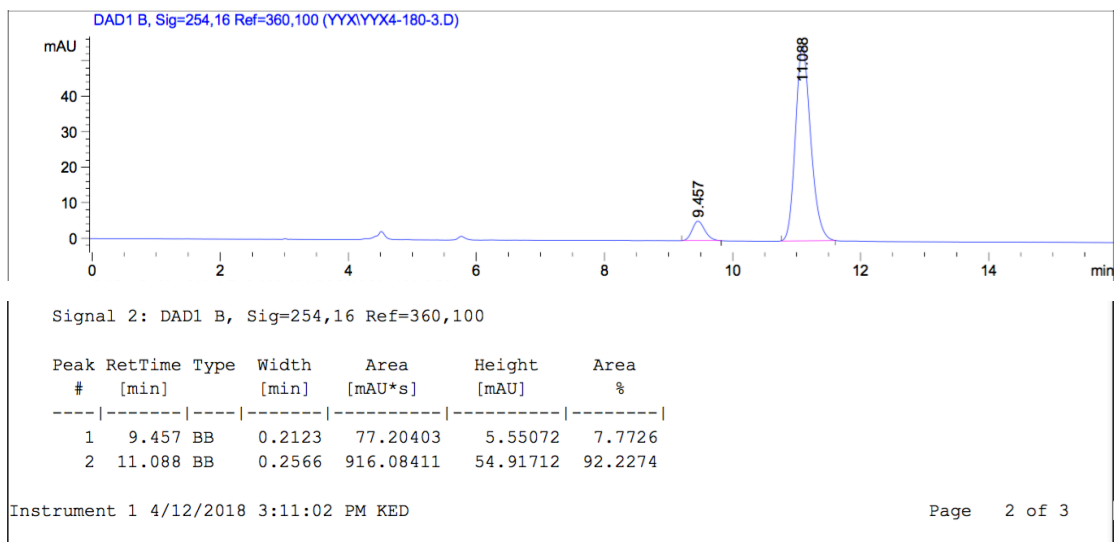

*tert*-butyl (S)-3-(1-(11-(1-(ethoxycarbonyl)piperidin-4-ylidene)-6,11-dihydro-5H-benzo[5,6]cyclohepta[1,2-*b*]pyridin-8-yl)ethyl)-1H-indole-1-carboxylate (**4f'**)

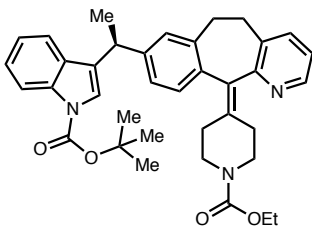

Racemic **4f'**:

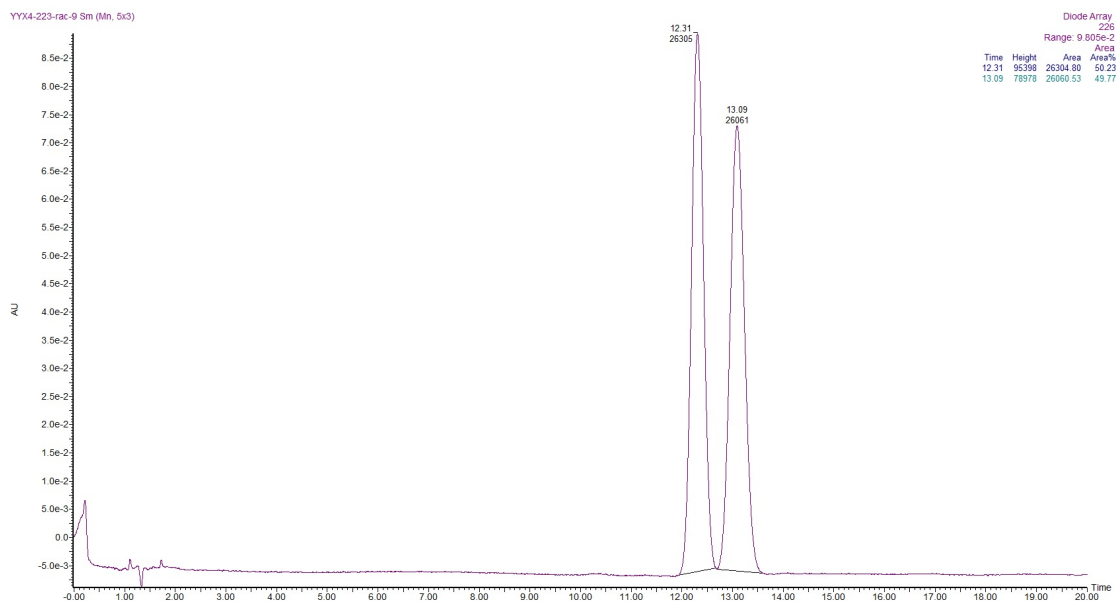

Enantioenriched **4f'**:

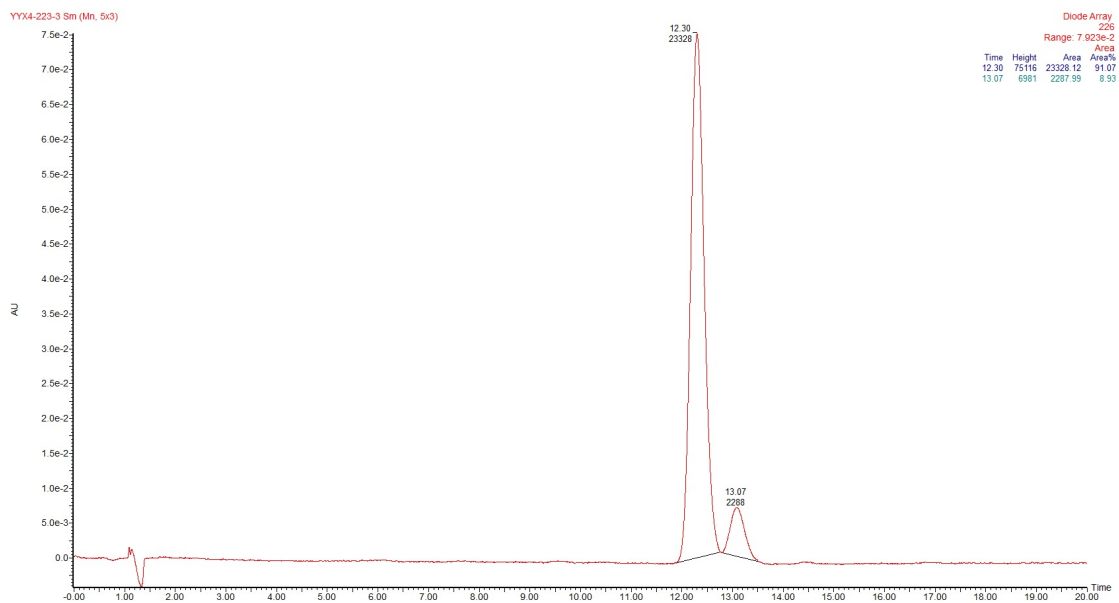

Supplement: NIHMS1014732-supplement-spectroscopic_data.pdf [file NIHMS1014732-supplement-spectroscopic_data.pdf]
