# Supplementary material
Source: PubMed Central journal article supplement (PMC6402987)
Supplement: NIHMS1014732-supplement-supporting_Information.pdf [file NIHMS1014732-supplement-supporting_Information.pdf]

# **CuH-Catalyzed Enantioselective Alkylation of Indole Derivatives with Ligand-Controlled Regiodivergence**

Yuxuan Ye<sup>1</sup>, Seoung-Tae Kim<sup>2,3</sup>, Jinhoon Jeong<sup>2,3</sup>, Mu-Hyun Baik<sup>2,3\*</sup>, Stephen L. Buchwald<sup>1\*</sup>

<sup>1</sup>Department of Chemistry, Massachusetts Institute of Technology, Cambridge, MA 02139, USA

<sup>2</sup>Department of Chemistry, Korea Advanced Institute of Science and Technology (KAIST),  
Daejeon, 34141, Republic of Korea

<sup>3</sup>Center for Catalytic Hydrocarbon Functionalizations, Institute for Basic Science (IBS),  
Daejeon, 34141, Republic of Korea

## **Table of Contents**

|                                                                |      |
|----------------------------------------------------------------|------|
| <b>I. General Information</b> .....                            | S2   |
| <b>II. CuH-Catalyzed Enantioselective N-Alkylation</b> .....   | S4   |
| <b>III. CuH-Catalyzed Enantioselective C3-Alkylation</b> ..... | S15  |
| <b>IV. Preparation of Indole Electrophile Reagents</b> .....   | S23  |
| <b>V. Preparation of Alkene Substrates</b> .....               | S30  |
| <b>VI. Computational Details</b> .....                         | S33  |
| <b>VII. References and Notes</b> .....                         | S105 |
| <b>VIII. Spectroscopic Data</b> .....                          | S108 |
| <b>IX. SFC/HPLC Traces</b> .....                               | S158 |

## I. General Information

**General Reagent Information:** All reactions were performed under a nitrogen atmosphere using the indicated method in the general procedures. Tetrahydrofuran (THF) was purchased from J.T. Baker in CYCLE-TAINER® solvent delivery kegs and purified by passage under argon pressure through two packed columns of neutral alumina and copper(II) oxide. Anhydrous 1,4-dioxane was purchased from Aldrich Chemical Company in a Sure-Seal™ bottle and used as received. Copper(II) acetate was purchased from Strem and was used as received. 1,2-Bis((2*S*,5*S*)2,5-diphenylphospholano)ethane, 1,2-Bis((2*R*,5*R*)2,5-diphenylphospholano)ethane (Ph-BPE) ligands were purchased from Namena Corp. and stored in a nitrogen-filled glove box. DTBM-SEGPPOS was purchased from Takasago International Co. and used as received. Diethoxymethylsilane was purchased from TCI America. Dimethoxy(methyl)silane (DMMS) was purchased from Tokyo Chemical Industry Co. (TCI). Both silanes were stored in a nitrogen-filled glove box at -20 °C for long-term storage. (**Caution:** *Dimethoxy(methyl)silane (DMMS, CAS#16881-77-9) is listed by several vendors (TCI, Alfa Aesar) SDS or MSDS as a H318, a category I Causes Serious Eye Damage Other vendors (Sigma-Aldrich, Gelest) list DMMS as a H319, a category II Eye Irritant. DMMS should be handled in a well-ventilated fumehood using proper precaution as outlined for the handling of hazardous materials in prudent practices in the laboratory*<sup>1</sup>. *At the end of the reaction either ammonium fluoride in methanol, aqueous sodium hydroxide (1 M) or aqueous hydrochloric acid (1 M) should be carefully added to the reaction mixture. This should be allowed to stir for at least 30 min or the time indicated in the detailed reaction procedure*). All other solvents and commercial reagents were used as received from Sigma Aldrich, Alfa Aesar, Acros Organics, TCI and Combi-Blocks, unless otherwise noted. Flash column chromatography was performed using 40-63 μm silica gel (SiliaFlash® F60 from Silicycle), or with the aid of a Biotage Isolera Automated Flash Chromatography System using prepacked SNAP silica cartridges (10-100 g). Organic solutions were concentrated *in vacuo* using a Buchi rotary evaporator.

**General Analytical Information:** All new compounds were characterized by NMR spectroscopy, IR spectroscopy, elemental analysis or high resolution mass spectrometry, optical rotation and melting point analysis (if solids). <sup>1</sup>H, <sup>13</sup>C and <sup>19</sup>F NMR spectra were recorded in CDCl<sub>3</sub> on a Bruker AMX-400 spectrometer. Chemical shifts for <sup>1</sup>H NMR are reported as follows: chemical shift in reference to residual CHCl<sub>3</sub> at 7.26 ppm (δ ppm), multiplicity (s =



singlet, br s = broad singlet, d = doublet, t = triplet, q = quartet, sex = sextet, sep = septet, ddd = doublet of double of doublets, td = triplet of doublets, m = multiplet), coupling constant (Hz), and integration. Chemical shifts for  $^{13}\text{C}$  NMR are reported in terms of chemical shift in reference to the  $\text{CDCl}_3$  solvent signal (77.16 ppm). Chemical shifts for  $^{19}\text{F}$ -NMR are reported in terms of chemical shift in reference to an external standard ( $\alpha,\alpha,\alpha$ -trifluorotoluene set to  $\delta$  -63.7 ppm). IR spectra were recorded on a Thermo Scientific Nicolet iS5 spectrometer (iD5 ATR, diamond) and are reported in terms of frequency of absorption ( $\text{cm}^{-1}$ ). Melting points were measured on a Mel-Temp capillary melting point apparatus. Optical rotations were measured using a Jasco P-1010 digital polarimeter. Elemental analyses were performed by Atlantic Microlabs Inc., Norcross, GA. ESI- and DART-MS spectrometric data were recorded on a Bruker Daltonics APEXIV 4.7 Tesla Fourier transform ion cyclotron resonance mass spectrometer (FT-ICR-MS). Enantiomeric excesses (ee's) were mostly determined by chiral SFC analysis using a Waters Acquity UPC2 instrument; specific columns and analytical methods are provided in the experimental details for individual compounds; the wavelengths of light used for chiral analyses are provided with the associated chromatograms. The enantiomeric excess of certain compounds were determined by High pressure liquid chromatography (HPLC) performing on Agilent 1200 Series chromatographs using chiral columns (25 cm). Thin-layer chromatography (TLC) was performed on silica gel 60Å  $\text{F}_{254}$  plates (SiliaPlate from Silicycle) and visualized with UV light or potassium permanganate stain. Preparatory thin-layer chromatography (Prep-TLC) was performed on silica gel GF with UV 254 (20 x 20 cm, 1000 microns, catalog # TLG-R10011B-341 from Silicycle) and visualized with UV light. Isolated yields reported reflect the average values from two independent runs.

## II. CuH-Catalyzed Enantioselective N-Alkylation

**Table S1. Optimization of CuH-catalyzed enantioselective N-alkylation.<sup>a</sup>**

| Entry | Change from the "standard conditions" | Yield (%)            | e.e. (%) | r.r.   |
|-------|---------------------------------------|----------------------|----------|--------|
| 1     | none                                  | 91 (85) <sup>b</sup> | 91       | > 20:1 |
| 2     | 70 °C                                 | 75                   | 93       | > 20:1 |
| 3     | DMMS instead of DEMS                  | 69                   | 22       | > 20:1 |
| 4     | 1.0 instead of 1.5 equiv of <b>2d</b> | 86                   | 89       | > 20:1 |
| 5     | 0.5 M instead of 0.1 M                | 71                   | 93       | 13:1   |
| 6     | no Et <sub>3</sub> COH                | 68                   | 92       | > 20:1 |

<sup>a</sup>Reactions were conducted on 0.1 mmol scale. Yields were determined by gas chromatography using dodecane as internal standard. The ee was determined by SFC analysis. The regioisomeric ratio (rr) was determined by GC analysis of the crude reaction mixture. <sup>b</sup>Isolated yield on a 0.5 mmol scale.

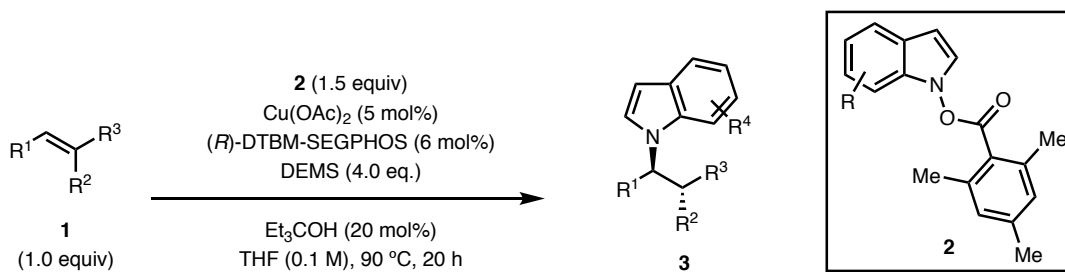

### General Procedure A:

*Preparation of CuH solution:* In a nitrogen-filled glovebox, an oven-dried screw-top reaction tube (Fisherbrand, 13 x 100 mm, catalog no. 14-959035C) equipped with a magnetic stir bar was charged with Cu(OAc)<sub>2</sub> (4.5 mg, 0.025 mmol, 5 mol %) and (*R*)-DTBM-SEGPHOS (35.4 mg, 0.030 mmol, 6 mol %). Anhydrous THF (0.5 mL) was added via syringe and the reaction

solution was stirred at room temperature (rt) for 15 min. HSiMe(OEt)<sub>2</sub> (0.32 mL, 2.0 mmol, 4.0 equiv) was added sequentially via syringe and the resulting mixture was stirred at rt to afford a pale yellow to orange solution of CuH (about 15 min).

*N-Alkylation:* In a nitrogen-filled glovebox, a second oven-dried screw-top reaction tube (Fisherbrand, 16 x 125 mm, catalog no. 1495925C) equipped with a stir bar was charged with indole electrophile **2d** (0.21 g, 0.75 mmol, 1.5 equiv). Anhydrous THF (4.2 mL), styrene (0.50 mmol, 1.0 equiv), and 3-ethyl-3-pentanol (14  $\mu$ l, 0.10 mmol, 0.20 equiv) were added, followed by addition of the CuH solution via syringe from the first reaction tube to the stirred reaction mixture at rt. The reaction tube was sealed with a Teflon-lined screw cap and removed from the glovebox, placed in a 90 °C oil bath and stirred for 20 h. After cooling to rt, the reaction cap was removed and dodecane (50  $\mu$ l) was added as an internal standard. An aliquot of the solution was transferred into a GC vial and diluted with EtOAc. GC analysis was used for determination of the conversion, yield and regioselectivity. Sat. NH<sub>4</sub>F in MeOH (5 mL) was slowly added to the reaction tube to quench the reaction as part of the workup (*Caution:* gas evolution observed). The mixture was stirred uncapped for 30 min, transferred to a 20 mL scintillation vial, the reaction tube was rinsed with EtOAc (2 mL  $\times$  3), and concentrated *in vacuo* with the aid of a rotary evaporator. The resulting residue was redissolved in EtOAc, filtered through a short pad of Celite and washed with additional EtOAc (~ 100 mL). The collected EtOAc solution was concentrated *in vacuo* with the aid of a rotary evaporator, and the crude material was purified by silica gel column chromatography.

### **General Procedure B:**

*Preparation of CuH solution:* see General Procedure A.

*N-Alkylation:* In a nitrogen-filled glovebox, a second oven-dried screw-top reaction tube (Fisherbrand, 16 x 125 mm, catalog no. 1495925C) equipped with a stir bar was charged with indole electrophile **2d** (0.14 g, 0.50 mmol, 1.0 equiv). Anhydrous THF (4.2 mL), styrene (0.75 mmol, 1.5 equiv) and KF (0.0058 g, 0.10 mmol, 0.20 equiv) were added, followed by addition of the CuH solution via syringe from the first reaction tube to the stirred reaction mixture at rt. The reaction tube was sealed with a Teflon-lined screw cap, removed from the glovebox, placed in a oil bath preheated to 70 °C and stirred for 20 h. After cooling to rt, the reaction cap was removed and dodecane (50  $\mu$ L) was added as an internal standard. An aliquot of the solution was transferred into a GC vial and diluted with EtOAc. GC analysis was used for determination of

the conversion, yield and regioselectivity. Sat.  $\text{NH}_4\text{F}$  in MeOH (5 mL) was slowly added to the reaction tube to quench the reaction as part of the workup (*Caution*: gas evolution observed). The mixture was stirred uncapped for 30 min, transferred to a 20 mL scintillation vial, the reaction tube was rinsed with EtOAc (2 mL  $\times$  3), and concentrated *in vacuo* with the aid of a rotary evaporator. The resulting residue was redissolved in EtOAc, filtered through a shot pad of Celite and washed with additional EtOAc (~ 100 mL). The collected EtOAc solution was concentrated *in vacuo* with the aid of a rotary evaporator, and the crude material was purified by silica gel column chromatography.

### Characterization Data for N-Alkylated Chiral Indoles

#### (S)-1-(1-phenylethyl)-1H-indole (3a)

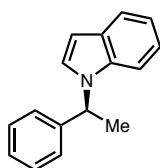

General procedure A was followed using styrene (0.052 g, 0.50 mmol, 1.0 equiv). The crude material was purified by flash column chromatography (Hexanes ~ Hexanes : EtOAc = 15 : 1) to provide the title compound as a white solid in 85% yield (Run 1: 98 mg, 89%, 91% ee; Run 2: 90 mg, 81%, 91% ee). m.p. 63-67 °C.  $^1\text{H}$  NMR (400 MHz,  $\text{CDCl}_3$ )  $\delta$  7.70–7.66 (m, 1H), 7.35–7.24 (m, 5H), 7.19–7.10 (m, 4H), 6.61 (dd,  $J = 3.2$  Hz,  $J = 0.8$ , 1H), 5.70 (q,  $J = 7.1$  Hz, 1H), 1.95 (d,  $J = 7.1$  Hz, 3H) ppm.  $^{13}\text{C}$  NMR (101 MHz,  $\text{CDCl}_3$ )  $\delta$  142.7, 136.1, 128.8, 128.7, 127.5, 125.9, 124.9, 121.5, 120.9, 119.6, 110.1, 101.5, 54.8, 21.8 ppm. IR (thin film) 3028, 1458, 1311, 1300, 1228, 1014, 737, 697  $\text{cm}^{-1}$ . EA Calcd. for  $\text{C}_{16}\text{H}_{15}\text{N}$ : C, 86.84; H, 6.83. Found: C, 86.83; H, 6.98.  $[\alpha]_{\text{D}}^{22} = -85.0$ . SFC analysis: ODH (5:95 MeOH:  $\text{scCO}_2$  to 15:85 MeOH:  $\text{scCO}_2$  linear gradient over 20 min, 2.50 mL/min), 6.66 min (major), 7.15 min (minor), 91% ee. The absolute stereochemistry was assigned as (S) by analogy to **3t**.

#### (S)-1-(1-(*o*-tolyl)ethyl)-1H-indole (3b)

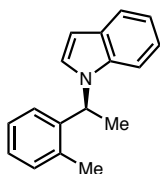

General procedure A was followed using 1-methyl-2-vinylbenzene (0.059 g, 0.50 mmol, 1.0 equiv). The crude material was purified by flash column chromatography (Hexanes ~ Hexanes : EtOAc = 15 : 1) to provide the title compound as a white solid in 81% yield (Run 1: 99 mg, 84%, 87% ee; Run 2: 92 mg, 78%, 87% ee). m.p. 38-42 °C.  $^1\text{H}$  NMR (400 MHz,  $\text{CDCl}_3$ )  $\delta$  7.72–7.68 (m, 1H), 7.30–7.12 (m, 8H), 6.57 (dd,  $J = 3.2$  Hz,  $J = 0.8$  Hz, 1H), 5.85 (q,  $J = 6.9$  Hz, 1H), 2.33–2.29 (s, 3H), 1.91 (d,  $J = 7.0$  Hz, 3H) ppm.  $^{13}\text{C}$  NMR (101 MHz,  $\text{CDCl}_3$ )  $\delta$  140.1, 140.0, 135.7, 130.8, 128.9,

127.7, 126.6, 125.4, 125.1, 121.5, 121.0, 119.6, 109.7, 101.3, 51.8, 20.5, 19.1 ppm. IR (thin film) 3047, 2976, 1509, 1476, 1458, 1307, 1228, 1012, 758, 737  $\text{cm}^{-1}$ . EA Calcd. for  $\text{C}_{17}\text{H}_{17}\text{N}$ : C, 86.77; H, 7.28. Found: C, 86.81; H, 7.33.  $[\alpha]_{\text{D}}^{22} = -72.3$ . SFC analysis: ODH (1:99 MeOH:  $\text{scCO}_2$  over 40 min, 2.50 mL/min), 21.95 min (minor), 22.68 min (major), 87% ee. The absolute stereochemistry was assigned as (*S*) by analogy to **3t**.

### (*S*)-1-(1-(3-methoxyphenyl)ethyl)-1*H*-indole (**3c**)

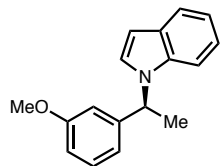

General procedure A was followed using 1-methoxy-3-vinylbenzene (0.067 g, 0.50 mmol, 1.0 equiv). The crude material was purified by flash column chromatography (Hexanes ~ Hexanes : EtOAc = 10 : 1) to provide the title compound as a colorless oil in 71% yield (Run 1: 83 mg, 66%, 93% ee; Run 2: 96 mg, 76%, 93% ee).  $^1\text{H}$  NMR (400 MHz,  $\text{CDCl}_3$ )  $\delta$  7.74–7.70 (m, 1H), 7.36 (d,  $J = 3.3$  Hz, 1H), 7.34–7.30 (m, 1H), 7.29–7.24 (m, 1H), 7.23–7.14 (m, 2H), 6.68–6.74 (m, 3H), 6.64 (dd,  $J = 3.3$  Hz,  $J = 0.8$  Hz, 1H), 5.70 (q,  $J = 7.1$  Hz, 1H), 3.79–3.76 (s, 3H), 1.96 (d,  $J = 7.1$  Hz, 3H) ppm.  $^{13}\text{C}$  NMR (101 MHz,  $\text{CDCl}_3$ )  $\delta$  160.0, 144.5, 136.2, 129.8, 128.9, 124.9, 121.5, 121.0, 119.6, 118.4, 112.4, 112.2, 110.1, 101.6, 55.2, 54.8, 21.8 ppm. IR (thin film) 2978, 2834, 1458, 1309, 1284, 1223, 1042, 738, 717, 696  $\text{cm}^{-1}$ . EA Calcd. for  $\text{C}_{17}\text{H}_{17}\text{NO}$ : C, 81.24; H, 6.82. Found: C, 81.22; H, 6.85.  $[\alpha]_{\text{D}}^{23} = -52.3$ . SFC analysis: ODH (5:95 MeOH:  $\text{scCO}_2$  to 15:85 MeOH:  $\text{scCO}_2$  linear gradient over 20 min, 2.50 mL/min), 9.33 min (major), 10.29 min (minor), 93% ee. The absolute stereochemistry was assigned as (*S*) by analogy to **3t**.

### (*S*)-1-(1-(4-fluorophenyl)ethyl)-1*H*-indole (**3e**)

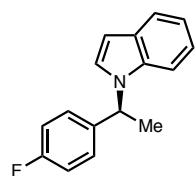

General procedure A was followed using 1-fluoro-4-vinylbenzene (0.061 g, 0.50 mmol, 1.0 equiv). The crude material was purified by flash column chromatography (Hexanes ~ Hexanes : EtOAc = 15 : 1) to provide the title compound as a white solid in 81% yield (Run 1: 93 mg, 78%, 93% ee; Run 2: 99 mg, 83%, 93% ee). m.p. 78–81  $^{\circ}\text{C}$ .  $^1\text{H}$  NMR (400 MHz,  $\text{CDCl}_3$ )  $\delta$  7.76–7.69 (m, 1H), 7.33 (d,  $J = 3.3$  Hz, 1H), 7.30–7.26 (m, 1H), 7.24–7.12 (m, 4H), 7.06–7.00 (m, 2H), 6.65 (dd,  $J = 3.3$  Hz,  $J = 0.8$  Hz, 1H), 5.71 (q,  $J = 7.1$  Hz, 1H), 1.96 (d,  $J = 7.1$  Hz, 3H) ppm.  $^{13}\text{C}$  NMR (101 MHz,  $\text{CDCl}_3$ )  $\delta$  (d,  $J = 247.5$  Hz), 138.5 (d,  $J = 3.0$  Hz), 136.0, 128.9, 127.6 (d,  $J = 8.1$  Hz), 124.7, 121.6, 121.0, 119.7, 115.6 (d,  $J = 21.2$  Hz), 110.0, 101.8, 54.2, 21.8 ppm.  $^{19}\text{F}$  NMR (376 MHz,  $\text{CDCl}_3$ )  $\delta$  -115.1 ppm. IR (thin film) 3049, 2979, 1508, 1459, 1310, 1299, 1226, 1158, 1013, 833,

763, 738  $\text{cm}^{-1}$ . EA Calcd. for  $\text{C}_{16}\text{H}_{14}\text{FN}$ : C, 80.31; H, 5.90. Found: C, 80.35; H, 6.04.  $[\alpha]_{\text{D}}^{22} = -80.6$ . **SFC** analysis: ODH (5:95 MeOH:  $\text{scCO}_2$  to 15:85 MeOH:  $\text{scCO}_2$  linear gradient over 20 min, 2.50 mL/min), 6.66 min (major), 7.15 min (minor), 93% ee. The absolute stereochemistry was assigned as (*S*) by analogy to **3t**.

### (*S*)-5-(1-(1*H*-indol-1-yl)ethyl)-1-tosyl-1*H*-indole (**3f**)

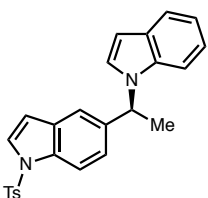

General procedure A was followed using 1-tosyl-5-vinyl-1*H*-indole (0.149 g, 0.50 mmol, 1.0 equiv). The crude material was purified by flash column chromatography (Hexanes ~ Hexanes : EtOAc = 4 : 1) to provide the title compound as a white solid in 52% yield (Run 1: 101 mg, 49%, 95% ee; Run 2: 114 mg, 55%, 95% ee). m.p. 152-158 °C.  $^1\text{H}$  NMR (400 MHz,  $\text{CDCl}_3$ )  $\delta$  7.89 (d,  $J = 8.6$  Hz, 1H), 7.79–7.71 (m, 2H), 7.67–7.62 (m, 1H), 7.54 (d,  $J = 3.7$  Hz, 1H), 7.33–7.05 (m, 8H), 6.58 (d,  $J = 3.1$  Hz, 1H), 6.55 (d,  $J = 3.7$  Hz, 1H), 5.74 (q,  $J = 7.1$  Hz, 1H), 2.36–2.31 (s, 3H), 1.93 (d,  $J = 7.1$  Hz, 3H) ppm.  $^{13}\text{C}$  NMR (101 MHz,  $\text{CDCl}_3$ )  $\delta$  145.0, 138.0, 136.0, 135.3, 134.0, 130.9, 129.9, 128.8, 126.9, 126.8, 124.8, 122.8, 121.4, 120.9, 119.6, 118.5, 113.7, 110.0, 108.9, 101.5, 54.8, 22.1, 21.6 ppm. IR (thin film) 2980, 1461, 1370, 1173, 1129, 742, 676, 576  $\text{cm}^{-1}$ . HRMS (DART)  $m/z$  calcd. for  $\text{C}_{25}\text{H}_{23}\text{N}_2\text{O}_2\text{S}^+ [\text{M}+\text{H}]^+$ : 415.1475; found 415.1456.  $[\alpha]_{\text{D}}^{22} = -103.1$ . **SFC** analysis: ADH (5:95 MeOH (0.1%  $\text{Et}_2\text{NH}$ ):  $\text{scCO}_2$  to 30:70 MeOH (0.1%  $\text{Et}_2\text{NH}$ ):  $\text{scCO}_2$  linear gradient over 25 min, 2.50 mL/min), 15.96 (major), 16.49 min (minor), 95% ee. The absolute stereochemistry was assigned as (*S*) by analogy to **3t**.

### *tert*-butyl (*S*)-4-(1*H*-indol-1-yl)-4-phenylbutanoate (**3g**)

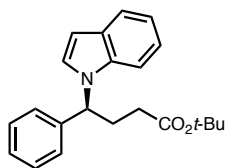

General procedure A was followed using *tert*-butyl (*E*)-4-phenylbut-3-enoate (0.109 g, 0.50 mmol, 1.0 equiv). The crude material was purified by flash column chromatography (Hexanes ~ Hexanes : EtOAc = 10 : 1) to provide the title compound as a white solid in 78% yield (Run 1: 124 mg, 74%, 96% ee; Run 2: 138 mg, 82%, 96% ee). m.p. 66-69 °C.  $^1\text{H}$  NMR (400 MHz,  $\text{CDCl}_3$ )  $\delta$  7.71 (d,  $J = 7.7$  Hz, 1H), 7.42–7.34 (m, 9H), 6.66 (d,  $J = 3.2$  Hz, 1H), 5.66 (t,  $J = 7.9$  Hz, 1H), 2.74–2.60 (m, 2H), 2.34–2.22 (m, 2H), 1.55–1.45 (s, 9H) ppm.  $^{13}\text{C}$  NMR (101 MHz,  $\text{CDCl}_3$ )  $\delta$  172.2, 141.1, 136.6, 128.8, 128.7, 127.7, 126.5, 124.9, 121.7, 121.0, 119.7, 109.9, 102.3, 80.7, 58.6, 32.2, 30.3, 28.2 ppm. IR (thin film) 2976, 1722, 1458, 1366, 1307, 1244, 1223, 1147, 847, 738, 698  $\text{cm}^{-1}$ . EA Calcd. for  $\text{C}_{22}\text{H}_{25}\text{NO}_2$ : C, 78.77; H, 7.51. Found: C, 78.56; H, 7.35.  $[\alpha]_{\text{D}}^{22} = -65.8$ . **SFC**

analysis: ODH (5:95 MeOH: scCO<sub>2</sub> to 15:85 MeOH: scCO<sub>2</sub> linear gradient over 20 min, 2.50 mL/min), 7.17 min (major), 8.40 min (minor), 96% ee. The absolute stereochemistry was assigned as (*S*) by analogy to **3t**.

**(*S*)-*N*-(3-(1*H*-indol-1-yl)-3-phenylpropyl)-*N*-methylpivalamide (**3h**)**

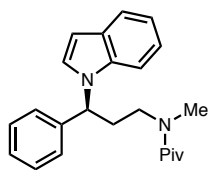

General procedure A was followed using *N*-cinnamyl-*N*-methylpivalamide (0.116 g, 0.50 mmol, 1.0 equiv). The crude material was purified by flash column chromatography (Hexanes ~ Hexanes : EtOAc = 3:1) to provide the title compound as a colorless oil in 69% yield (Run 1: 115 mg, 66%, 96% ee; Run 2: 125 mg, 72%, 96% ee). <sup>1</sup>H NMR (400 MHz, CDCl<sub>3</sub>) δ 7.69 (d, *J* = 7.6 Hz, 1H), 7.47 (d, *J* = 3.3 Hz, 1H), 7.38–7.11 (m, 8H), 6.66 (d, *J* = 3.3 Hz, 1H), 5.56 (t, *J* = 7.7 Hz, 1H), 3.49–3.27 (m, 2H), 3.07–3.01 (s, 3H), 2.68–2.56 (m, 2H), 1.33–1.23 (s, 9H) ppm. <sup>13</sup>C NMR (101 MHz, CDCl<sub>3</sub>) δ 177.5, 141.1, 136.3, 128.8, 127.7, 126.3, 124.9, 121.7, 121.0, 119.7, 109.8, 102.3, 57.8, 48.8, 38.7, 37.2, 32.8, 28.2 ppm. IR (thin film) 2956, 1616, 1478, 1458, 1404, 1363, 1304, 1208, 1103, 909, 762, 698 cm<sup>-1</sup>. EA Calcd. for C<sub>22</sub>H<sub>25</sub>NO<sub>2</sub>: C, 78.77; H, 7.51. Found: C, 78.56; H, 7.35. [α]<sub>D</sub><sup>22</sup> = -60.2. SFC analysis: ODH (5:95 MeOH: scCO<sub>2</sub> to 15:85 MeOH: scCO<sub>2</sub> linear gradient over 20 min, 2.50 mL/min), 14.86 min (major), 16.75 min (minor), 96% ee. The absolute stereochemistry was assigned as (*S*) by analogy to **3t**.

***N*-((2*S*,3*S*)-3-(1*H*-indol-1-yl)-2-methyl-3-phenylpropyl)-*N*,4-dimethylbenzenesulfonamide (**3i**)**

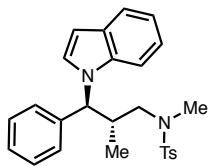

General procedure B was followed using (*E*)-*N*,4-dimethyl-*N*-(2-methyl-3-phenylallyl)benzenesulfonamide (0.237 g, 0.75 mmol, 1.5 equiv). The crude material was purified by flash column chromatography (Hexanes ~ Hexanes : EtOAc = 5:1) to provide the title compound as a white foam in 41% yield (Run 1: 78 mg, 36%, 99% ee; Run 2: 99 mg, 46%, 99% ee). <sup>1</sup>H NMR (400 MHz, CDCl<sub>3</sub>) δ 7.51 (d, *J* = 7.9 Hz, 1H), 7.44–7.37 (m, 3H), 7.33–6.95 (m, 10H), 6.50 (d, *J* = 3.2 Hz, 1H), 4.98 (d, *J* = 10.5 Hz, 1H), 3.00–2.86 (m, 1H), 2.78–2.60 (m, 2H), 2.62–2.57 (s, 3H), 2.28–2.30 (s, 3H), 0.99 (d, *J* = 6.5 Hz, 3H) ppm. <sup>13</sup>C NMR (101 MHz, CDCl<sub>3</sub>) δ 143.4, 139.3, 136.4, 133.7, 129.7, 128.8, 128.5, 127.9, 127.4, 127.3, 124.2, 121.8, 120.9, 119.6, 109.6, 102.7, 63.5, 54.6, 37.2, 37.0, 21.5, 16.2 ppm. IR (thin film) 2969, 2924, 1458, 1337, 1304, 1159, 1089, 973, 741, 700, 655 cm<sup>-1</sup>. HRMS (DART) *m/z* calcd. for C<sub>26</sub>H<sub>29</sub>N<sub>2</sub>O<sub>2</sub>S<sup>+</sup> [M+H]<sup>+</sup>: 433.1944; found 433.1928. [α]<sub>D</sub><sup>23</sup> = -72.6. SFC analysis:

ADH (5:95 MeOH: scCO<sub>2</sub> to 20:80 MeOH: scCO<sub>2</sub> linear gradient over 15 min, 2.50 mL/min), 11.89 min (major), 12.70 min (minor), 99% ee. The absolute stereochemistry was assigned as (*S*) by analogy to **3t**.

**(*S*)-*N,N*-diethyl-3-(1-(6-(trifluoromethyl)-1*H*-indol-1-yl)ethyl)benzamide (**3j**)**

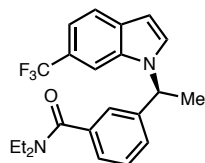

General procedure A was followed using *N,N*-diethyl-3-vinylbenzamide (0.102 g, 0.50 mmol, 1.0 equiv), and indole electrophile **2e** (0.26 g, 0.75 mmol, 1.5 equiv). The crude material was purified by flash column chromatography (Hexanes ~ Hexanes : EtOAc = 1:1) to provide the title compound as a colorless oil in 56% yield (Run 1: 99 mg, 51%, 81% ee; Run 2: 117 mg, 60%, 81% ee). <sup>1</sup>H NMR (400 MHz, CDCl<sub>3</sub>) δ 7.72 (d, *J* = 8.3 Hz, 1H), 7.46 (d, *J* = 3.3 Hz, 1H), 7.43 (s, 1H), 7.40–7.25 (m, 3H), 7.19 (d, *J* = 7.7 Hz, 1H), 7.03 (s, 1H), 6.65 (d, *J* = 3.3 Hz, 1H), 5.71 (q, *J* = 7.1 Hz, 1H), 3.65–3.35 (m, 2H), 3.15–2.95 (m, 2H), 1.94 (d, *J* = 7.0 Hz, 3H), 1.3–1.1 (m, 3H), 0.9–0.7 (m, 3H) ppm. <sup>13</sup>C NMR (101 MHz, CDCl<sub>3</sub>) δ 170.8, 142.5, 137.8, 134.8, 131.3, 129.2, 127.7, (q, *J* = 31 Hz), 125.2 (q, *J* = 272.9 Hz), 126.6, 125.8, 123.4, 121.4, 116.3 (q, *J* = 3.4 Hz), 107.5 (q, *J* = 4.5 Hz), 102.1, 55.2, 43.2, 39.3, 21.6, 13.7, 12.8 ppm. <sup>19</sup>F NMR (376 MHz, CDCl<sub>3</sub>) δ -60.5 ppm. IR (thin film) 2978, 2937, 1623, 1338, 1273, 1157, 1111, 1056, 911, 816, 726, 667 cm<sup>-1</sup>. EA Calcd. for C<sub>22</sub>H<sub>25</sub>NO<sub>2</sub>: C, 78.77; H, 7.51. Found: C, 78.56; H, 7.35. [α]<sub>D</sub><sup>22</sup> = -63.7. SFC analysis: ODH (5:95 MeOH: scCO<sub>2</sub> to 15:85 MeOH: scCO<sub>2</sub> linear gradient over 20 min, 2.50 mL/min), 8.15 min (major), 8.72 min (minor), 81% ee. The absolute stereochemistry was assigned as (*S*) by analogy to **3t**.

***tert*-butyl (*S*)-1-(1-(2-(difluoromethoxy)phenyl)ethyl)-1*H*-indole-4-carboxylate (**3k**)**

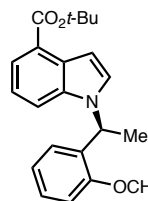

General procedure A was followed using 1-(difluoromethoxy)-2-vinylbenzene (0.085 g, 0.50 mmol, 1.0 equiv), and indole electrophile **2f** (0.28 g, 0.75 mmol, 1.5 equiv). The crude material was purified by flash column chromatography (Hexanes ~ Hexanes : EtOAc = 5:1) to provide the title compound as a colorless oil in 61% yield (Run 1: 112 mg, 58%, 92% ee; Run 2: 124 mg, 64%, 92% ee). <sup>1</sup>H NMR (400 MHz, CDCl<sub>3</sub>) δ 7.85 (d, *J* = 7.5 Hz, 1H), 7.53 (d, *J* = 3.3 Hz, 1H), 7.38 (d, *J* = 8.2 Hz, 1H), 7.26–7.10 (m, 4H), 7.03 (t, *J* = 7.5 Hz, 1H), 6.82 (dd, *J* = 7.8 Hz, *J* = 1.7 Hz, 1H), 6.57 (t, *J* = 73.7 Hz, 1H), 6.05 (q, *J* = 7.0 Hz, 1H), 1.92 (d, *J* = 7.0 Hz, 3H), 1.68 (s, 9H) ppm. <sup>13</sup>C NMR (101 MHz, CDCl<sub>3</sub>) δ 166.8, 148.0, 136.8, 134.2, 129.0, 128.2, 126.7, 126.5, 126.0, 123.6, 123.3, 120.8,



118.5, 116.2 (t,  $J = 260.3$  Hz), 114.3, 102.9, 80.7, 49.4, 28.5, 20.7 ppm.  $^{19}\text{F}$  NMR (376 MHz,  $\text{CDCl}_3$ )  $\delta$  -79.7 (dd,  $J = 169.2$  Hz,  $J = 73.6$  Hz), -80.2 (dd,  $J = 169.2$  Hz,  $J = 73.6$  Hz) ppm. IR (thin film) 2979, 1698, 1366, 1291, 1271, 1254, 1166, 1120, 1037, 750.0, 728.2  $\text{cm}^{-1}$ . EA Calcd. for  $\text{C}_{22}\text{H}_{25}\text{NO}_2$ : C, 78.77; H, 7.51. Found: C, 78.56; H, 7.35.  $[\alpha]_{\text{D}}^{22} = +53.9$ . SFC analysis: ODH (5:95 MeOH:  $\text{scCO}_2$  to 10:90 MeOH:  $\text{scCO}_2$  linear gradient over 12 min, 2.50 mL/min), 5.38 min (major), 5.65 min (minor), 92% ee. The absolute stereochemistry was assigned as (*S*) by analogy to **3t**.

### (*S*)-1-(1-(3-chlorophenyl)ethyl)-2-methyl-1*H*-indole (**3l**)

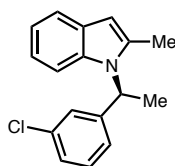

General procedure A was followed using 1-chloro-3-vinylbenzene (0.069 g, 0.50 mmol, 1.0 equiv), and indole electrophile **2g** (0.22 g, 0.75 mmol, 1.5 equiv). The crude material was purified by flash column chromatography (Hexanes ~ Hexanes : EtOAc = 10:1) to provide the title compound as a yellow oil in 81% yield (Run 1: 105 mg, 78%, 93% ee; Run 2: 113 mg, 84%, 93% ee).  $^1\text{H}$  NMR (400 MHz,  $\text{CDCl}_3$ )  $\delta$  7.58 (d,  $J = 7.6$  Hz, 1H), 7.35–7.20 (m, 3H), 7.15–7.00 (m, 4H), 6.35 (s, 1H), 5.74 (q,  $J = 7.2$  Hz, 1H), 2.40 (s, 3H), 1.96 (d,  $J = 7.2$  Hz, 3H) ppm.  $^{13}\text{C}$  NMR (101 MHz,  $\text{CDCl}_3$ )  $\delta$  143.8, 136.5, 135.9, 134.7, 129.9, 128.7, 127.4, 126.5, 124.7, 120.5, 119.9, 119.4, 110.8, 101.5, 52.1, 18.6, 14.0 ppm. IR (thin film) 2980, 1596, 1458, 1398, 1308, 782, 748, 720  $\text{cm}^{-1}$ . HRMS (DART)  $m/z$  calcd. for  $\text{C}_{17}\text{H}_{17}\text{NCl}^+$   $[\text{M}+\text{H}]^+$ : 270.1044; found 270.1048.  $[\alpha]_{\text{D}}^{22} = -42.6$ . SFC analysis: ODH (5:95 MeOH:  $\text{scCO}_2$  to 15:85 MeOH:  $\text{scCO}_2$  linear gradient over 20 min, 2.50 mL/min), 7.89 min (minor), 8.81 min (major), 93% ee. The absolute stereochemistry was assigned as (*S*) by analogy to **3t**.

### methyl (*S*)-1-(1-phenylethyl)-1*H*-indole-2-carboxylate (**3m**)

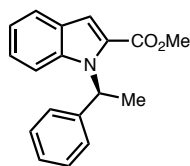

General procedure A was followed using styrene (0.104 g, 1.0 mmol, 2.0 equiv), and indole electrophile **2j** (0.17 g, 1.0 mmol, 1.0 equiv). Dioxane was used as the solvent instead of THF. The crude material was purified by flash column chromatography (Hexanes ~ Hexanes : EtOAc = 10:1) to provide the title compound as a colorless oil in 43% yield (Run 1: 56 mg, 40%, 0% ee; Run 2: 64 mg, 46%, 0% ee).  $^1\text{H}$  NMR (400 MHz,  $\text{CDCl}_3$ )  $\delta$  7.60–7.54 (m, 1H), 7.30 (s, 1H), 7.24–7.10 (m, 5H), 7.02–6.92 (m, 3H), 6.92–6.86 (m, 1H), 3.81 (s, 3H), 1.87 (d,  $J = 7.1$  Hz, 3H) ppm.  $^{13}\text{C}$  NMR (101 MHz,  $\text{CDCl}_3$ )  $\delta$  162.9, 141.5, 138.0, 128.5, 127.7, 127.0, 126.9, 126.4, 124.5, 122.8, 120.4,

113.6, 111.6, 53.1, 51.8, 18.2 ppm. IR (thin film) 2950, 1703, 1516, 1446, 1436, 1319, 1197, 1162, 1138, 747  $\text{cm}^{-1}$ . HRMS (DART)  $m/z$  calcd. for  $\text{C}_{18}\text{H}_{18}\text{NO}_2^+$   $[\text{M}+\text{H}]^+$ : 280.1332; found 280.1327. SFC analysis: ODH (5:95 MeOH:  $\text{scCO}_2$  to 15:85 MeOH:  $\text{scCO}_2$  linear gradient over 20 min, 2.50 mL/min), 5.66 min (major), 6.50 min (minor), 0% ee.

**(S)-3-(2-methoxyethyl)-1-(1-(4-(trifluoromethyl)phenyl)ethyl)-1H-indole (3n)**

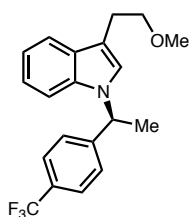

General procedure A was followed using 1-(trifluoromethyl)-4-vinylbenzene (0.086 g, 0.50 mmol, 1.0 equiv), and indole electrophile **2k** (0.506 g, 1.5 mmol, 3.0 equiv). Dioxane was used as the solvent instead of THF. The crude material was purified by flash column chromatography (Hexanes ~ Hexanes : EtOAc = 10:1) to provide the title compound as a colorless oil in 16% yield (Run 1: 28 mg, 16%, 17% ee).  $^1\text{H}$  NMR (400 MHz,  $\text{CDCl}_3$ )  $\delta$  7.66–7.61 (m, 1H), 7.53 (d,  $J = 8.1$  Hz, 2H), 7.22–7.08 (m, 6H), 5.67 (q,  $J = 7.1$  Hz, 1H), 3.71 (t,  $J = 7.2$  Hz, 2H), 3.42 (s, 3H), 3.09 (t,  $J = 7.2$  Hz, 2H), 1.93 (d,  $J = 7.1$  Hz, 3H) ppm.  $^{13}\text{C}$  NMR (101 MHz,  $\text{CDCl}_3$ )  $\delta$  147.0, 136.3, 129.7 (q,  $J = 32.4$  Hz), 128.4, 126.2, 125.7 (q,  $J = 3.7$  Hz), 124.0 (q,  $J = 272.0$  Hz), 122.5, 121.8, 119.3, 119.2, 112.5, 109.9, 73.1, 58.7, 54.4, 25.8, 21.7 ppm.  $^{19}\text{F}$  NMR (376 MHz,  $\text{CDCl}_3$ )  $\delta$  -62.5 ppm. IR (thin film) 2922, 1619, 1460, 1322, 1163, 1111, 1069, 1014, 840, 737, 617  $\text{cm}^{-1}$ . SFC analysis: ODH (5:95 MeOH:  $\text{scCO}_2$  to 10:90 MeOH:  $\text{scCO}_2$  linear gradient over 12 min, 2.50 mL/min), 4.80 min (major), 5.94 min (minor), 17% ee. The absolute stereochemistry was assigned as (*S*) by analogy to **3t**.

**1-(3-(benzo[d][1,3]dioxol-5-yl)propyl)-1H-indole (3o)**

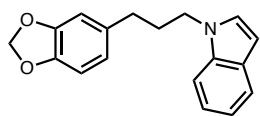

General procedure B was followed using Safrole (0.122 g, 0.75 mmol, 1.5 equiv). The crude material was purified by flash column chromatography (Hexanes ~ Hexanes : EtOAc = 10:1) to provide the title compound as an colorless oil in 61% yield (Run 1: 78 mg, 56%; Run 2: 92 mg, 66%).  $^1\text{H}$  NMR (400 MHz,  $\text{CDCl}_3$ )  $\delta$  7.69 (d,  $J = 7.9$  Hz, 1H), 7.34 (d,  $J = 8.2$  Hz, 1H), 7.25 (td,  $J = 8.1$  Hz,  $J = 1.0$  Hz, 1H), 7.19–7.10 (m, 2H), 6.78 (d,  $J = 7.9$  Hz, 1H), 6.70 (d,  $J = 1.6$  Hz, 1H), 6.64 (dd,  $J = 7.9$  Hz,  $J = 1.7$  Hz, 1H), 6.55 (dd,  $J = 3.2$  Hz,  $J = 0.8$  Hz, 1H), 5.96 (s, 2H), 4.15 (d,  $J = 7.0$  Hz, 2H), 2.59 (dd,  $J = 8.4$  Hz,  $J = 6.8$  Hz, 2H), 2.17 (p,  $J = 7.3$  Hz, 2H) ppm.  $^{13}\text{C}$  NMR (101 MHz,  $\text{CDCl}_3$ )  $\delta$  147.8, 145.9, 136.0, 134.8, 128.7, 127.77, 121.4, 121.2, 121.0, 119.3, 109.4, 108.8, 108.3, 101.1,

100.9, 45.6, 32.7, 31.8 ppm. IR (thin film) 2925, 1501, 1487, 1441, 1243, 1036, 926, 808, 738, 719  $\text{cm}^{-1}$ . EA Calcd. for  $\text{C}_{18}\text{H}_{17}\text{NO}_2$ : C, 77.40; H, 6.13. Found: C, 77.10; H, 6.18.

### 6-methyl-4-(4-(4-methyl-1*H*-indol-1-yl)butoxy)-2-(trifluoromethyl)quinolone (3p)

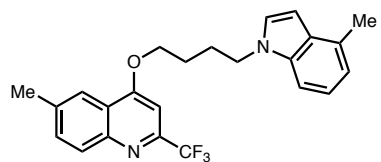

General procedure B was followed using 6-methyl-4-(4-(4-methyl-1*H*-indol-1-yl)butoxy)-2-(trifluoromethyl)quinoline (0.211 g, 0.75 mmol, 1.5 equiv), and indole electrophile **2h** (0.15 g, 1.0 mmol, 1.0 equiv). The crude material was purified by flash column chromatography (Hexanes ~ Hexanes : EtOAc = 5:1) to provide the title compound as a white solid in 76% yield (Run 1: 151 mg, 73%; Run 2: 163 mg, 79%). m.p. 120-122 °C.  $^1\text{H}$  NMR (400 MHz,  $\text{CDCl}_3$ )  $\delta$  8.18 (d,  $J = 8.6$  Hz, 1H), 8.08 (s, 1H), 7.75 (dd,  $J = 8.7$  Hz,  $J = 2.0$  Hz, 1H), 7.45–7.25 (m, 3H), 7.12–7.05 (m, 2H), 6.70 (d,  $J = 3.0$  Hz, 1H), 4.42 (t,  $J = 6.8$  Hz, 2H), 4.31 (t,  $J = 6.2$  Hz, 2H), 2.72 (s, 3H), 2.71 (s, 3H), 2.38 (m, 2H), 2.26 (m, 2H) ppm.  $^{13}\text{C}$  NMR (101 MHz,  $\text{CDCl}_3$ )  $\delta$  162.3, 148.1 (q,  $J = 34.0$  Hz), 146.7, 137.8, 135.6, 133.1, 130.6, 129.4, 128.6, 127.0, 121.8, 121.7 (q,  $J = 275.2$  Hz), 121.6, 120.6, 119.7, 106.9, 100.0, 99.9, 96.6 (q,  $J = 2.3$  Hz), 68.3, 46.1, 26.8, 26.4, 21.9, 18.7 ppm.  $^{19}\text{F}$  NMR (376 MHz,  $\text{CDCl}_3$ )  $\delta$  -67.6 ppm. IR (thin film) 2932, 1576, 1368, 1280, 1254, 1180, 1132, 1110, 1093, 745, 715  $\text{cm}^{-1}$ . HRMS (DART)  $m/z$  calcd. for  $\text{C}_{24}\text{H}_{24}\text{N}_2\text{OF}_3$   $[\text{M}+\text{H}]^+$ : 413.1835; found 413.1834.

### (*Z*)-1-(hex-4-en-1-yl)-1*H*-indole (3q)

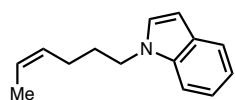

General procedure B was followed using (*Z*)-hexa-1,4-diene (0.062 g, 0.75 mmol, 1.5 equiv). The crude material was purified by flash column chromatography (Hexanes ~ Hexanes : EtOAc = 10:1) to provide the title compound as a colorless oil in 73% yield (Run 1: 70 mg, 70%; Run 2: 76 mg, 76%).  $^1\text{H}$  NMR (400 MHz,  $\text{CDCl}_3$ )  $\delta$  7.72 (d,  $J = 7.8$  Hz, 1H), 7.42 (dd,  $J = 8.3$  Hz,  $J = 1.0$  Hz, 1H), 7.29 (td,  $J = 7.7$  Hz,  $J = 1.2$  Hz, 1H), 7.19 (td,  $J = 7.5$  Hz,  $J = 1.0$  Hz, 1H), 7.16 (d,  $J = 3.1$  Hz, 1H), 6.57 (dd,  $J = 3.2$  Hz,  $J = 0.9$  Hz, 1H), 5.67–5.66 (m, 1H), 5.52–5.42 (m, 1H), 4.18 (t,  $J = 7.1$  Hz, 2H), 2.14 (q,  $J = 7.2$  Hz, 2H), 1.98 (p,  $J = 7.2$  Hz, 2H), 1.66 (d,  $J = 6.7$  Hz, 3H) ppm.  $^{13}\text{C}$  NMR (101 MHz,  $\text{CDCl}_3$ )  $\delta$  136.0, 129.1, 128.7, 127.9, 125.3, 121.4, 121.0, 119.3, 109.5, 101.0, 45.8, 30.0, 24.2, 13.0 ppm. IR (thin film) 3013, 2927, 1511, 1463, 1334, 1315, 1172, 762, 736, 712  $\text{cm}^{-1}$ . HRMS (DART)  $m/z$  calcd. for  $\text{C}_{14}\text{H}_{18}\text{N}^+$   $[\text{M}+\text{H}]^+$ : 200.1434; found 200.1430.

### (*S*)-1-(3,7-dimethyloct-6-en-1-yl)-1*H*-indole (**3r**)

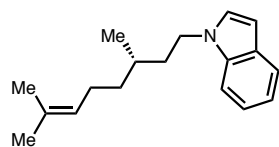

General procedure B was followed using (*S*)-3,7-dimethylocta-1,6-diene (0.104 g, 0.75 mmol, 1.5 equiv). The crude material was purified by flash column chromatography (Hexanes ~ Hexanes : EtOAc = 10:1) to provide the title compound as a colorless oil in 71% yield (Run 1: 86 mg, 67%; Run 2: 97 mg, 76%). <sup>1</sup>H NMR (400 MHz, CDCl<sub>3</sub>) δ 7.68 (d, *J* = 7.9 Hz, 1H), 7.39 (d, *J* = 8.2 Hz, 1H), 7.25 (t, *J* = 7.6 Hz, 1H), 7.18–7.11 (m, 2H), 6.54 (d, *J* = 2.9 Hz, 1H), 5.13 (t, *J* = 7.1 Hz, 1H), 4.26–4.10 (m, 2H), 2.14–1.86 (m, 3H), 1.73 (s, 3H), 1.71 (m, 1H), 1.64 (m, 3H), 1.60–1.40 (m, 2H), 1.34–1.22 (m, 1H), 1.03 (d, *J* = 6.6 Hz, 3H) ppm. <sup>13</sup>C NMR (101 MHz, CDCl<sub>3</sub>) δ 135.9, 131.5, 128.6, 127.6, 124.5, 121.3, 121.0, 119.2, 109.4, 101.0, 44.5, 37.2, 36.9, 30.2, 25.8, 25.4, 19.5, 17.7 ppm. IR (thin film) 2958, 2915, 1512, 1464, 1376, 1334, 1315, 1194, 1085, 1012, 762, 736 cm<sup>-1</sup>. EA Calcd. for C<sub>18</sub>H<sub>25</sub>N: C, 84.65; H, 9.87. Found: C, 84.68; H, 9.84.

### 6-chloro-1-(2-(cyclohex-3-en-1-yl)ethyl)-1*H*-indole (**3s**)

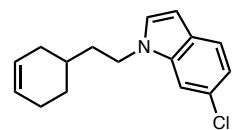

General procedure B was followed using 4-vinylcyclohex-1-ene (0.081 g, 0.75 mmol, 1.5 equiv), and indole electrophile **2i** (0.16 g, 1.0 mmol, 1.0 equiv). The crude material was purified by flash column chromatography (Hexanes ~ Hexanes : EtOAc = 10:1) to provide the title compound as a colorless oil in 63% yield (Run 1: 79 mg, 61%; Run 2: 84 mg, 65%). <sup>1</sup>H NMR (400 MHz, CDCl<sub>3</sub>) δ 7.53 (d, *J* = 8.4 Hz, 1H), 7.33 (s, 1H), 7.14–7.00 (m, 2H), 6.46 (d, *J* = 3.0 Hz, 1H), 5.75–5.60 (m, 2H), 4.13 (t, *J* = 7.5 Hz, 2H), 2.25–2.00 (m, 3H), 1.90–1.70 (m, 4H), 1.67–1.55 (m, 1H), 1.40–1.25 (m, 1H) ppm. <sup>13</sup>C NMR (101 MHz, CDCl<sub>3</sub>) δ 136.3, 128.4, 127.4, 127.1, 127.1, 125.9, 121.8, 119.9, 109.3, 101.3, 44.3, 36.6, 31.6, 31.1, 28.6, 24.9 ppm. IR (thin film) 3021, 2914, 2836, 1506, 1464, 1434, 1319, 901, 802, 716, 654 cm<sup>-1</sup>. EA Calcd. for C<sub>16</sub>H<sub>18</sub>ClN: C, 73.98; H, 6.98. Found: C, 73.90; H, 6.93.

### (*S*)-3-(1*H*-indol-1-yl)-*N*-methyl-3-phenylpropan-1-amine (**3t**)

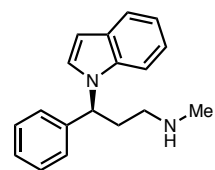

General procedure B was followed using (*E*)-*N*-methyl-3-phenylprop-2-en-1-amine (0.11 g, 0.50 mmol, 1.5 equiv). The crude material was first purified by column (EtOAc ~ EtOAc : MeOH = 5:1), and then by preparative thin layer chromatography (EtOAc : MeOH (2M Ammonium solution) = 10:1) to provide the title compound as an amorphous solid in 15% yield (~95% purity). <sup>1</sup>H NMR (400

MHz, CDCl<sub>3</sub>) δ 7.63 (dt, *J* = 7.6 Hz, *J* = 1.0 Hz, 1H), 7.37–7.19 (m, 7H), 7.15 (ddd, *J* = 8.3 Hz, *J* = 7.0 Hz, *J* = 1.3 Hz, 1H), 7.09 (ddd, *J* = 8.0 Hz, *J* = 7.0 Hz, *J* = 1.1 Hz, 1H), 6.58 (d, *J* = 3.3 Hz, 1H), 5.70 (t, *J* = 7.8 Hz, 1H), 2.68–2.51 (m, 4H), 2.41 (s, 3H) ppm. <sup>13</sup>C NMR (101 MHz, CDCl<sub>3</sub>) δ 141.0, 136.3, 128.8, 128.6, 127.7, 126.4, 124.9, 121.7, 121.0, 119.7, 109.9, 102.2, 57.2, 48.4, 35.6, 34.4 ppm. [α]<sub>D</sub><sup>25</sup> = -0.128. SFC analysis: CEL2 (5:95 MeOH: scCO<sub>2</sub> to 20:80 MeOH: scCO<sub>2</sub> linear gradient over 8 min, 2.50 mL/min), 5.01 min (major), 5.41 min (minor), 50% ee. *The absolute stereochemistry was assigned as (S) by comparison to the sign of the specific rotation to the same compound previously reported in the literature.*<sup>6a</sup>

### III. CuH-Catalyzed Enantioselective C3-Alkylation

Table S2. Optimization of CuH-catalyzed enantioselective C3-alkylation.<sup>a</sup>

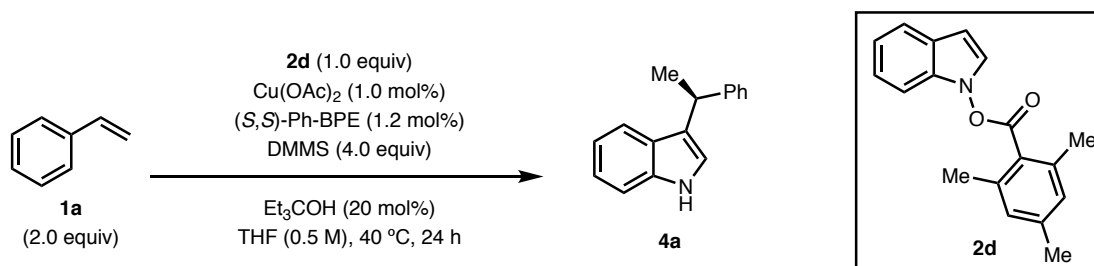

| Entry | Change from the “standard conditions”         | Yield (%)            | e.e. (%) | r.r.  |
|-------|-----------------------------------------------|----------------------|----------|-------|
| 1     | none                                          | 79 (71) <sup>b</sup> | 79       | 5.3:1 |
| 2     | 90 °C                                         | 59                   | 67       | 2.1:1 |
| 3     | 5 mol% instead of 1 mol% Cu(OAc) <sub>2</sub> | 78                   | 72       | 6.0:1 |
| 4     | DEMS instead of DMMS                          | 22                   | 94       | 2.3:1 |
| 5     | 1.0 instead of 2.0 equiv of <b>1a</b>         | 37                   | 83       | 4.9:1 |
| 6     | 0.1 M instead of 0.5 M                        | 55                   | 73       | 3.7:1 |
| 7     | no Et <sub>3</sub> COH                        | 67                   | 73       | 5.6:1 |

<sup>a</sup>Reactions were conducted on 0.1 mmol scale. Yields were determined by gas chromatography using dodecane as an internal standard. The ee was determined by SFC analysis. The regioisomeric ratio (rr) was determined by <sup>1</sup>H NMR analysis of the crude reaction mixture.

<sup>b</sup>Isolated yield on a 0.5 mmol scale. <sup>d</sup>

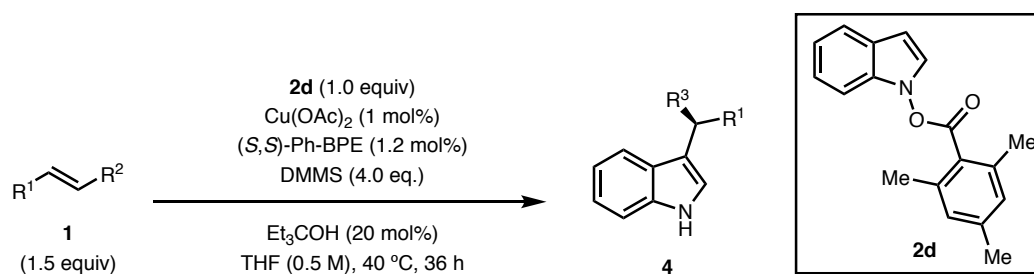

### General Procedure C:

*Preparation of CuH solution:* In a nitrogen-filled glovebox, an oven-dried screw-top reaction tube (Fisherbrand, 13 x 100 mm, catalog no. 14-959035C) equipped with a magnetic stir bar was charged with Cu(OAc)<sub>2</sub> (0.9 mg, 0.005 mmol, 1 mol %) and (*S,S*)-Ph-BPE (3.1 mg, 0.006 mmol, 1.2 mol %). Anhydrous THF (0.5 mL) was added via a syringe and the reaction solution was stirred at room temperature (rt) for 15 min. HSiMe(OMe)<sub>2</sub> (0.25 mL, 2.0 mmol, 4.0 equiv) [Note: see warning about HSiMe(OMe)<sub>2</sub> at the beginning of the experimental section] was added sequentially via syringe and the resulting mixture was stirred at rt to afford a pale yellow to orange solution of CuH (about 15 min).

*C3-Alkylation:* In a nitrogen-filled glovebox, a second oven-dried screw-top reaction tube (Fisherbrand, 16 x 125 mm, catalog no. 1495925C) equipped with a stir bar was charged with indole electrophile **2d** (0.14 g, 0.50 mmol, 1.0 equiv). Anhydrous THF (0.25 mL), styrene (1.0 mmol, 2.0 equiv), and 3-ethyl-3-pentanol (14 μL, 0.10 mmol, 0.20 equiv) were added, followed by addition of the CuH solution via syringe from the first reaction tube to the stirred reaction mixture at rt. The reaction tube was sealed with a Teflon-lined screw cap and removed from the glovebox, placed in an oil bath preheated to 40 °C and stirred for 20 h. After cooling to rt, the reaction cap was removed and dodecane (50 μL) was added as an internal standard. An aliquot of the solution was transferred into a GC vial and diluted with EtOAc. GC analysis was used for determination of the conversion, yield and regioselectivity. Sat. NH<sub>4</sub>F in MeOH (5 mL) was slowly added to the reaction tube to quench the reaction as part of the workup (*Caution:* gas evolution observed). The mixture was stirred uncapped for 30 min, transferred to a 20 mL scintillation vial, the reaction tube was rinsed with EtOAc (2 mL × 3), and concentrated *in vacuo* with the aid of a rotary evaporator. The resulting residue was redissolved in EtOAc, filtered through a shot pad of Celite and washed with additional EtOAc (about 100 mL). The collected EtOAc solution was concentrated *in vacuo* with the aid of a rotary evaporator, and the crude material was purified by silica gel column chromatography.

## Characterization Data for C3-Alkylated Chiral Indoles

### (S)-3-(1-phenylethyl)-1H-indole (4a)

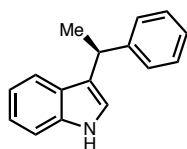

The general procedure C was followed using styrene (0.104 g, 1.0 mmol, 2.0 equiv). The crude material was purified by flash column chromatography (Hexanes ~ Hexanes : EtOAc = 5:1) to provide the title compound as a white solid in 71% yield (Run 1: 74 mg, 67%, 76% ee; Run 2: 83 mg, 75%, 76% ee) with 6:1 regioselectivity (C3:N). m.p. 98-101 °C. <sup>1</sup>H NMR (400 MHz, CDCl<sub>3</sub>) δ 7.75 (s, 1H), 7.35–6.85 (m, 10H), 4.28 (q, *J* = 7.2 Hz, 1H), 1.61 (d, *J* = 7.2 Hz, 3H) ppm. <sup>13</sup>C NMR (101 MHz, CDCl<sub>3</sub>) δ 146.8, 136.6, 128.3, 127.5, 126.9, 125.9, 122.0, 121.5, 121.1, 119.7, 119.2, 111.0, 34.0, 22.4 ppm. IR (thin film) 3406, 2966, 2869, 1490, 1456, 1223, 10-95, 1010, 739, 699 cm<sup>-1</sup>. HRMS (DART) *m/z* calcd. for C<sub>16</sub>H<sub>16</sub>N<sup>+</sup> [M+H]<sup>+</sup>: 222.1277; found 222.1277. [α]<sub>D</sub><sup>22</sup> = -6.8. SFC analysis: ADH (5:95 MeOH: scCO<sub>2</sub> to 20:80 MeOH: scCO<sub>2</sub> linear gradient over 15 min, 2.50 mL/min), 8.04 min (minor), 8.93 min (major), 76% ee. The absolute stereochemistry was assigned as (*S*) by analogy to **4e**.

### (S)-3-(1-(4-(trifluoromethyl)phenyl)ethyl)-1H-indole (4b)

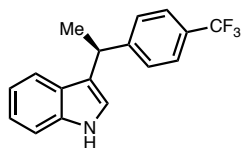

The general procedure C was followed using 1-(trifluoromethyl)-4-vinylbenzene (0.172 g, 1.0 mmol, 2.0 equiv). The crude material was purified by flash column chromatography (Hexanes ~ Hexanes : EtOAc = 5:1) to provide the title compound as a white solid in 61% yield (Run 1: 84 mg, 58%, 65% ee; Run 2: 93 mg, 64%, 65% ee) with >20:1 regioselectivity (C3:N). m.p. 92-96 °C. <sup>1</sup>H NMR (400 MHz, CDCl<sub>3</sub>) δ 8.01 (s, 1H), 7.58 (d, *J* = 8.1 Hz, 2H), 7.45 (d, *J* = 8.1 Hz, 2H), 7.39 (t, *J* = 8.6 Hz, 2H), 7.24 (t, *J* = 7.6 Hz, 1H), 7.14–7.05 (m, 2H), 4.49 (q, *J* = 7.2 Hz, 1H), 1.78 (d, *J* = 7.2 Hz, 3H) ppm. <sup>13</sup>C NMR (101 MHz, CDCl<sub>3</sub>) δ 151.0, 136.7, 128.3 (q, *J* = 32.2 Hz), 127.8, 126.7, 125.3 (q, *J* = 3.8 Hz), 124.4 (q, *J* = 271.8 Hz), 122.3, 121.2, 120.4, 119.5, 119.4, 111.2, 36.9, 22.2 ppm. <sup>19</sup>F NMR (376 MHz, CDCl<sub>3</sub>) δ -62.1 ppm. IR (thin film) 3412, 2968, 1456, 1321, 1161, 1108, 1067, 1015, 841, 767, 740 cm<sup>-1</sup>. HRMS (DART) *m/z* calcd. for C<sub>17</sub>H<sub>15</sub>NF<sub>3</sub><sup>+</sup> [M+H]<sup>+</sup>: 290.1151; found 290.1145. [α]<sub>D</sub><sup>22</sup> = -5.4. SFC analysis: ADH (5:95 MeOH: scCO<sub>2</sub> to 20:80 MeOH: scCO<sub>2</sub> linear gradient over 15 min, 2.50 mL/min), 5.53 min (minor), 5.94 min (major), 65% ee. The absolute stereochemistry was assigned as (*S*) by analogy to **4e**.

### (*S*)-5-(1-(1*H*-indol-3-yl)ethyl)-1-tosyl-1*H*-indole (**4c**)

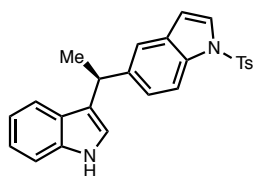

The general procedure C was followed using 1-tosyl-5-vinyl-1*H*-indole (0.297 g, 1.0 mmol, 2.0 equiv). The crude material was purified by flash column chromatography (Hexanes ~ Hexanes : EtOAc = 3:1) to provide the title compound as a foam solid in 55% yield (Run 1: 106 mg, 51%, 85% ee; Run 2: 122 mg, 59%, 85% ee) with 3:1 regioselectivity (C3:N). <sup>1</sup>H NMR (400 MHz, CDCl<sub>3</sub>) δ 7.81 (s, 1H), 7.76 (d, *J* = 8.6 Hz, 1H), 7.60 (d, *J* = 8.0 Hz, 2H), 7.38 (d, *J* = 3.7 Hz, 1H), 7.30 (s, 1H), 7.20 (d, *J* = 8.0 Hz, 1H), 7.15 (d, *J* = 8.3 Hz, 2H), 7.05–6.95 (m, 3H), 6.85–6.78 (m, 2H), 6.40 (d, *J* = 3.6 Hz, 1H), 4.30 (q, *J* = 7.2 Hz, 1H), 2.12 (s, 3H), 1.56 (d, *J* = 7.1 Hz, 3H) ppm. <sup>13</sup>C NMR (101 MHz, CDCl<sub>3</sub>) δ 144.9, 142.3, 136.7, 135.4, 133.4, 131.0, 129.9, 126.9, 126.8, 126.3, 124.7, 122.0, 121.5, 121.3, 119.8, 119.7, 119.2, 113.3, 111.2, 109.2, 36.9, 22.9, 21.6 ppm. IR (thin film) 3422, 2962, 1456, 1367, 1188, 1170, 1142, 1123, 1092, 812, 703, 676 cm<sup>-1</sup>. HRMS (DART) *m/z* calcd. for C<sub>25</sub>H<sub>23</sub>N<sub>2</sub>O<sub>2</sub>S<sup>+</sup> [M+H]<sup>+</sup>: 415.1475; found 415.1460. [α]<sub>D</sub><sup>22</sup> = -12.8. HPLC analysis (ADH, 20% IPA in hexanes, 1.0 mL/min, 254 nm) indicated 85% ee: *t*<sub>R</sub> (major) = 18.7 min, *t*<sub>R</sub> (minor) = 25.1 min. The absolute stereochemistry was assigned as (*S*) by analogy to **4e**.

### (*S*)-3-(1*H*-indol-3-yl)-*N*-(4-methoxybenzyl)-*N*-methyl-3-phenylpropan-1-amine (**4d**)

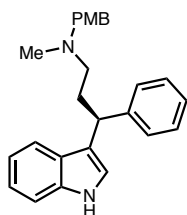

The general procedure C was followed using (*E*)-*N*-(4-methoxybenzyl)-*N*-methyl-3-phenylprop-2-en-1-amine (0.267 g, 1.0 mmol, 2.0 equiv). The crude material was purified by flash column chromatography (Hexanes ~ Hexanes : EtOAc = 1:1) to provide the title compound as a colorless oil in 61% yield (Run 1: 113 mg, 59%, 67% ee; Run 2: 121 mg, 63%, 67% ee) with 4:1 regioselectivity (C3:N). <sup>1</sup>H NMR (400 MHz, CDCl<sub>3</sub>) δ 8.00 (s, 1H), 7.45 (d, *J* = 8.0 Hz, 1H), 7.37–7.10 (m, 11H), 6.81 (d, *J* = 8.6 Hz, 2H), 4.30 (t, *J* = 7.0 Hz, 1H), 3.80 (s, 3H), 3.44 (s, 2H), 2.60–2.20 (m, 4H), 2.19 (s, 3H) ppm. <sup>13</sup>C NMR (101 MHz, CDCl<sub>3</sub>) δ 158.6, 145.2, 136.5, 130.3, 128.3, 127.9, 127.0, 126.0, 122.0, 121.0, 119.5, 119.2, 113.6, 111.0, 61.5, 55.5, 55.3, 41.9, 40.5, 33.7 ppm. IR (thin film) 3417, 2934, 2834, 2793, 1510, 1455, 1243, 1032, 740, 700 cm<sup>-1</sup>. HRMS (DART) *m/z* calcd. for C<sub>26</sub>H<sub>29</sub>N<sub>2</sub>O<sup>+</sup> [M+H]<sup>+</sup>: 385.2274; found 385.2287. [α]<sub>D</sub><sup>23</sup> = +14.2. SFC analysis: ADH (5:95 MeOH (0.1% Et<sub>2</sub>NH): scCO<sub>2</sub> to 30:70 MeOH (0.1% Et<sub>2</sub>NH): scCO<sub>2</sub> linear gradient over 25 min, 2.50 mL/min), 11.82 min (minor), 12.38 min (major), 67% ee. The absolute stereochemistry was assigned as (*S*) by analogy to **4e**.



### 3-((*S*)-1-((8*R*,9*S*,13*S*,14*S*)-13-methyl-6,7,8,9,11,12,13,14,15,16-

### decahydrospiro[cyclopenta[*a*]phenanthrene-17,2'-[1,3]dioxolan]-2-yl)ethyl)-1*H*-indole (**4e**)

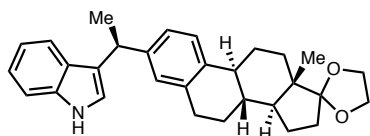

The general procedure C was followed using (8*R*,9*S*,13*S*,14*S*)-13-methyl-2-vinyl-6,7,8,9,11,12,13,14,15,16-decahydrospiro[cyclopenta[*a*]phenanthrene-17,2'-[1,3]dioxolane]

(0.325 g, 1.0 mmol, 2.0 equiv). The crude material was purified by flash column chromatography (Hexanes ~ Hexanes : EtOAc = 3:1) to provide the title compound as a white solid in 62% yield (Run 1: 126 mg, 57%, 84% ee; Run 2: 139 mg, 63%, 84% ee) with 5:1 regioselectivity (C3:N). m.p. 169-173 °C. <sup>1</sup>H NMR (400 MHz, CDCl<sub>3</sub>) δ 7.95 (s, 1H), 7.48 (d, *J* = 7.6 Hz, 1H), 7.34 (d, *J* = 8.2 Hz, 1H), 7.24–6.98 (m, 6H), 4.34 (q, *J* = 7.1 Hz, 1H), 4.05–3.85 (m, 4H), 2.93–2.75 (m, 2H), 2.40–2.20 (m, 2H), 2.12–2.00 (m, 1H), 1.95–1.75 (m, 4H), 1.71 (d, *J* = 7.2 Hz, 3H), 1.70–1.25 (m, 6H), 0.90 (s, 3H) ppm. <sup>13</sup>C NMR (101 MHz, CDCl<sub>3</sub>) δ 143.9, 137.9, 136.6, 136.5, 127.8, 127.0, 125.2, 124.8, 121.9, 121.8, 121.0, 119.8, 119.5, 119.1, 111.0, 65.3, 64.6, 49.6, 46.2, 44.0, 38.9, 36.4, 34.3, 30.8, 29.7, 27.1, 25.9, 22.5, 22.4, 14.4 ppm. IR (thin film) 3414, 2933, 2870, 1456, 1158, 1102, 1043, 1011, 906, 728, 647 cm<sup>-1</sup>. HRMS (DART) *m/z* calcd. for C<sub>30</sub>H<sub>35</sub>NO<sub>2</sub><sup>+</sup> [M+H]<sup>+</sup>: 442.2741; found 442.2728. [α]<sub>D</sub><sup>22</sup> = -4.4. **HPLC** analysis (ADH, 10% IPA in hexanes, 1.0 mL/min, 254 nm) indicated 84% ee: *t*<sub>R</sub> (major) = 11.1 min, *t*<sub>R</sub> (minor) = 9.5 min. The absolute configuration of **4e** was determined by X-ray crystallographic analysis. CCDC 1854713 contains the supplementary crystallographic data for this diastereomer. These data can be obtained free of charge from the Cambridge Crystallographic Data Centre via [www.ccdc.cam.ac.uk/data\\_request/cif](http://www.ccdc.cam.ac.uk/data_request/cif).

### Single Crystal X-ray Diffraction Data for 4e (P18006\_t4).

Crystal of the complex **4e** was obtained by layering *n*-pentane upon the DCM solution of **4e** at ambient conditions (room temperature, air).

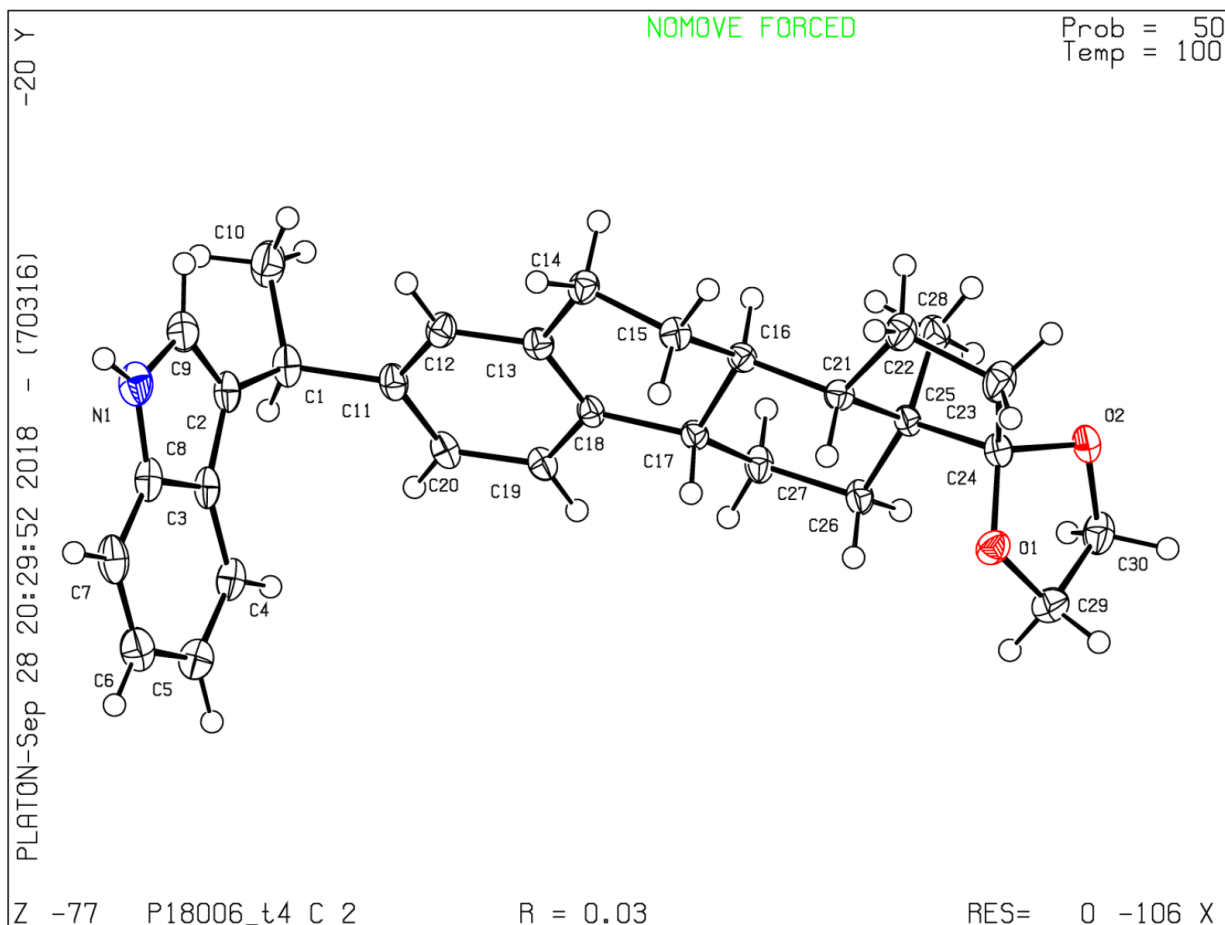

**Table S3. Crystal data and structure refinement for 4e (P18006\_t4).**

|                      |                    |          |
|----------------------|--------------------|----------|
| Identification code  | P18006_t4          |          |
| Empirical formula    | C30 H35 N O2       |          |
| Formula weight       | 441.59             |          |
| Temperature          | 100(2) K           |          |
| Wavelength           | 1.54178 Å          |          |
| Crystal system       | Monoclinic         |          |
| Space group          | C2                 |          |
| Unit cell dimensions | a = 18.0835(5) Å   | a = 90°. |
| b = 7.9265(2) Å      | b = 114.1748(13)°. |          |
|                      | S20                |          |

|                                   |                                             |
|-----------------------------------|---------------------------------------------|
| c = 18.2000(5) Å                  | g = 90°.                                    |
| Volume                            | 2379.98(11) Å <sup>3</sup>                  |
| Z                                 | 4                                           |
| Density (calculated)              | 1.232 Mg/m <sup>3</sup>                     |
| Absorption coefficient            | 0.588 mm <sup>-1</sup>                      |
| F(000)                            | 952                                         |
| Crystal size                      | 0.160 x 0.075 x 0.030 mm <sup>3</sup>       |
| Theta range for data collection   | 4.913 to 74.460°.                           |
| Index ranges                      | ?<=h<=?, ?<=k<=?, ?<=l<=?                   |
| Reflections collected             | 4888                                        |
| Independent reflections           | 4888 [R(int) = ?]                           |
| Completeness to theta = 67.679°   | 99.9 %                                      |
| Absorption correction             | Semi-empirical from equivalents             |
| Refinement method                 | Full-matrix least-squares on F <sup>2</sup> |
| Data / restraints / parameters    | 4888 / 2 / 303                              |
| Goodness-of-fit on F <sup>2</sup> | 1.026                                       |
| Final R indices [I>2sigma(I)]     | R1 = 0.0277, wR2 = 0.0723                   |
| R indices (all data)              | R1 = 0.0284, wR2 = 0.0728                   |
| Absolute structure parameter      | 0.06(6)                                     |
| Extinction coefficient            | n/a                                         |
| Largest diff. peak and hole       | 0.202 and -0.149 e.Å <sup>-3</sup>          |

The structure factors and structural output was checked using IUCr's CheckCIF routine. The routine indicated a B-level alert in the structure. The explanation for the alert is attached below.

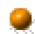

**Alert level B**

**PLAT411 ALERT 2 B** Short Inter H...H Contact H17 ..H17 . 1.89 Ang.  
1-x,y,1-z = 2\_656 Check

**Author Response: Residual density for this hydrogen atom is clearly visible in the difference Fourier synthesis and this hydrogen atom needs to be in this position for chemical reasons.**

**Ethyl (S)-4-(8-(1-(1*H*-indol-3-yl)ethyl)-5,6-dihydro-11*H*-benzo[5,6]cyclohepta[1,2-*b*]pyridin-11-ylidene)piperidine-1-carboxylate (4f)**

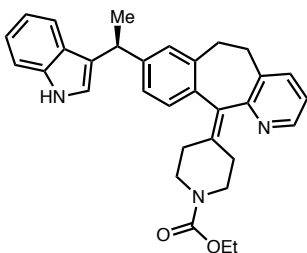

The general procedure C was followed using ethyl 4-(8-vinyl-5,6-dihydro-11*H*-benzo[5,6]cyclohepta[1,2-*b*]pyridin-11-ylidene)piperidine-1-carboxylate (0.375 g, 1.0 mmol, 2.0 equiv). The crude material was purified by flash column chromatography (CH<sub>2</sub>Cl<sub>2</sub> ~ CH<sub>2</sub>Cl<sub>2</sub> : MeOH = 30:1) to provide the title compound as an oil in 41% yield (Run 1: 88 mg, 36%; Run 2: 113 mg, 46%) with 5:1 regioselectivity (C3:N). <sup>1</sup>H NMR (400 MHz, CDCl<sub>3</sub>) δ 8.39 (m, 1H), 8.09 (m, 1H), 7.48–7.38 (m, 2H), 7.34 (dd, *J* = 8.1 Hz, *J* = 2.7 Hz, 1H), 7.19–6.97 (m, 7H), 4.31 (q, *J* = 7.2 Hz, 1H), 4.13 (q, *J* = 7.1 Hz, 2H), 3.90–3.70 (m, 2H), 3.45–3.25 (m, 2H), 3.20–3.05 (m, 2H), 2.90–2.70 (m, 2H), 2.55–2.20 (m, 4H), 1.67 (d, *J* = 7.1 Hz, 3H), 1.24 (t, *J* = 7.1 Hz, 3H) ppm. <sup>13</sup>C NMR (101 MHz, CDCl<sub>3</sub>) δ 158.0, 155.6, 146.3, 146.0, 137.3, 137.2, 136.6, 136.3, 135.3, 134.0, 129.4, 129.3, 128.4, 128.1, 126.9, 125.1, 124.9, 122.1, 121.8, 121.3, 121.2, 121.2, 121.0, 119.6, 119.0, 111.1, 61.3, 45.0, 44.9, 36.6, 32.1, 31.7, 31.7, 30.7, 30.6, 22.5, 22.4, 14.7 ppm. IR (thin film) 2967, 2920, 1695, 1436, 1264, 1226, 1114, 767, 734, 701 cm<sup>-1</sup>. HRMS (DART) *m/z* calcd. for C<sub>32</sub>H<sub>34</sub>N<sub>3</sub>O<sub>2</sub><sup>+</sup> [M+H]<sup>+</sup>: 492.2646; found 492.2620. [α]<sub>D</sub><sup>23</sup> = -28.4. The absolute stereochemistry was assigned as (*S*) by analogy to **4e**.

***tert*-butyl (S)-3-(1-(11-(1-(ethoxycarbonyl)piperidin-4-ylidene)-6,11-dihydro-5*H*-benzo[5,6]cyclohepta[1,2-*b*]pyridin-8-yl)ethyl)-1*H*-indole-1-carboxylate (4f')**

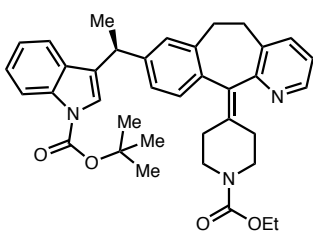

The crude material was purified by flash column chromatography (CH<sub>2</sub>Cl<sub>2</sub> ~ CH<sub>2</sub>Cl<sub>2</sub> : MeOH = 30:1) to provide the title compound as a purple liquid in 95% yield. <sup>1</sup>H NMR (400 MHz, CDCl<sub>3</sub>) δ 8.37 (d, *J* = 4.8 Hz, 1H), 8.07 (m, 1H), 7.41 (m, 2H), 7.33–7.20 (m, 2H), 7.13–6.97 (m, 5H), 4.20 (m, 1H), 4.11 (m, 2H), 3.78 (m, 2H), 3.39–3.26 (m, 2H), 3.12 (m, 2H), 2.82–2.69 (m, 2H), 2.55–2.14 (m, 4H), 1.65 (m, 12H), 1.24 (m, 3H) ppm. <sup>13</sup>C NMR (101 MHz, CDCl<sub>3</sub>) δ 171.1, 157.9, 155.5, 146.5, 144.5, 137.6, 137.5, 137.3, 137.2, 136.9, 136.8, 136.5, 135.7, 135.2, 133.8, 130.1, 129.5, 129.4, 128.2, 127.9, 125.5, 125.4, 125.2, 124.9, 124.2, 122.3, 122.3, 122.2, 122.0, 119.9, 119.9, 115.2, 115.2, 83.5, 65.9, 61.3, 60.4, 45.0, 44.8, 36.4, 32.1, 32.0, 31.8, 31.7, 31.7, 30.7, 30.5, 28.3, 22.0, 21.1, 15.3, 14.7, 14.2 ppm. IR (thin film) 3414, 2933, 2870, 1456, 1158, 1102, 1043, 1011, 906, 728, 647 cm<sup>-1</sup>. HRMS (DART) *m/z* calcd. for C<sub>37</sub>H<sub>42</sub>N<sub>3</sub>O<sub>4</sub><sup>+</sup> [M+H]<sup>+</sup>: 592.3170; found 592.3134. [α]<sub>D</sub><sup>23</sup> = +35.2. SFC analysis: OJH (5:95

MeOH (0.1% Et<sub>2</sub>NH): scCO<sub>2</sub> to 10:90 MeOH (0.1% Et<sub>2</sub>NH): scCO<sub>2</sub> linear gradient over 20 min, 2.50 mL/min), 12.30 min (major), 13.07 min (minor), 81% ee.

### 3-(3-(2-fluoro-4-methoxyphenyl)propyl)-1H-indole (4g)

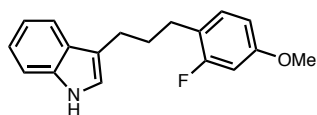

The general procedure C was followed using 1-allyl-2-fluoro-4-methoxybenzene (0.166 g, 1.0 mmol, 2.0 equiv). The crude material was purified by flash column chromatography (Hexanes ~ Hexanes : EtOAc = 5:1) to provide the title compound as a white solid in 32% yield (Run 1: 43 mg, 30%; Run 2: 48 mg, 34%) with > 20:1 regioselectivity (C3:N). m.p. 86-89 °C. <sup>1</sup>H NMR (400 MHz, CDCl<sub>3</sub>) δ 7.90 (s, 1H), 7.60 (d, *J* = 8.2 Hz, 1H), 7.36 (dt, *J* = 8.1 Hz, *J* = 0.9 Hz, 1H), 7.22–7.16 (m, 1H), 7.14–7.06 (m, 2H), 7.02–6.98 (m, 1H), 6.67–6.57 (m, 2H), 3.78 (s, 3H), 2.80 (t, *J* = 7.6 Hz, 2H), 2.69 (t, *J* = 7.6 Hz, 2H), 2.02 (p, *J* = 7.6 Hz, 2H) ppm. <sup>13</sup>C NMR (101 MHz, CDCl<sub>3</sub>) δ 161.6 (d, *J* = 244.3 Hz), 159.0 (d, *J* = 10.9 Hz), 136.4, 130.8 (d, *J* = 7.3 Hz), 127.6, 121.9, 121.1, 119.1, 119.0, 116.5, 111.0, 109.5 (d, *J* = 3.0 Hz), 101.6, 101.4, 55.5, 30.6, 28.2 (d, *J* = 1.4 Hz), 24.7 ppm. <sup>19</sup>F NMR (376 MHz, CDCl<sub>3</sub>) δ -116.6 ppm. IR (thin film) 3415, 2930, 2859, 2357, 1625, 1506, 1456, 1283, 1141, 1096, 741, 668 cm<sup>-1</sup>. HRMS (DART) *m/z* calcd. for C<sub>18</sub>H<sub>19</sub>NOF<sup>+</sup> [M+H]<sup>+</sup>: 284.1445; found 284.1438.

## IV. Preparation of Indole Electrophile Reagents

### Method A (reduction conditions):<sup>2</sup>

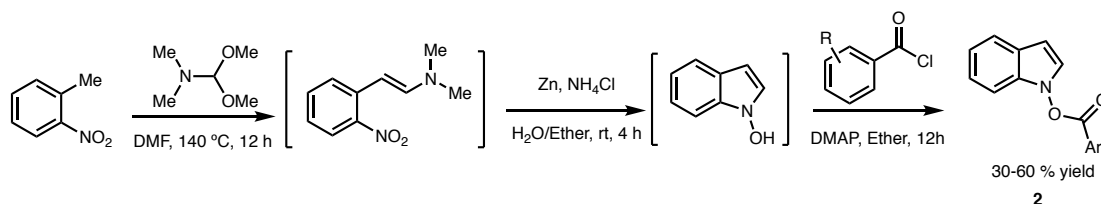

### General Procedure:

*Hydroxyindole (ether solution) synthesis:* A 300 mL round bottom flask equipped with a magnetic stir bar, was charged with 2-nitrotoluene (4.72 mL, 40.0 mmol, 1.0 equiv) and *N,N*-dimethylformamide dimethyl acetal (14.3 g, 120 mmol, 3.0 equiv). *N,N*-dimethylformamide (DMF, 90 mL) was added and the solution was heated to 140 °C for 12 h with stirring. After cooling to rt, the solvent was evaporated under reduced pressure with the aid of a rotary evaporator. The red-colored residue (crude enamine) was then dissolved in Et<sub>2</sub>O (240 mL), followed by the addition of zinc powder (52.3 g, 800 mmol, 20.0 equiv), and a solution of NH<sub>4</sub>Cl

(7.63 g, 144 mmol, 3.6 equiv) in H<sub>2</sub>O (50 mL). The mixture was vigorously stirred for about 4 h at rt until the color of the solution turned yellow from red (*Caution*: hydrogen gas evolution was observed at the beginning of the reaction). The mixture was then filtered through a fritted funnel. The filtrate was collected and the organic phase was separated from the aqueous phase with a separation funnel. The organic layer (crude 1-hydroxyindole in Et<sub>2</sub>O) was dried over anhydrous Na<sub>2</sub>SO<sub>4</sub> and filtered.

*Synthesis of indole electrophiles from hydroxyindoles*: To the resulting dried ether solution from above, under argon, was added 4-(dimethylamino)pyridine (5.86 g, 48.0 mmol, 1.2 equiv) followed by the addition of the corresponding benzoyl chloride (44.0 mmol, 1.1 equiv). The reaction mixture was then stirred under argon overnight at rt. Upon completion, the mixture was diluted with Et<sub>2</sub>O and quenched with a saturated aqueous NaHCO<sub>3</sub> solution. The aqueous phase was extracted with Et<sub>2</sub>O and the combined organic phases were dried over Na<sub>2</sub>SO<sub>4</sub>, filtered and concentrated under reduced pressure with the aid of a rotary evaporator. The crude material was purified by flash column chromatography to provide the corresponding indole electrophile reagents.

**Method B (oxidation conditions):**<sup>3,4</sup>

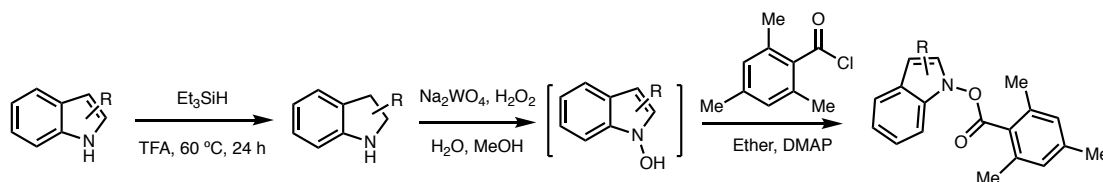

**General Procedure:**

*Indoline synthesis*: Triethylsilane (4.65 g, 40.0 mmol, 2.0 equiv) was added to a solution of the indole derivative (20.0 mmol, 1.0 equiv) in trifluoroacetic acid (TFA, 60 mL) and the mixture was stirred at 60 °C for 24 h. After cooling to rt, TFA was removed by distillation under reduced pressure. The crude residue was cooled to 0 °C with an ice water bath, neutralized with saturated NaHCO<sub>3</sub> aqueous solution (100 mL), and extracted with CH<sub>2</sub>Cl<sub>2</sub> (50 mL × 3). The combined organic layers were washed with brine, dried over Na<sub>2</sub>SO<sub>4</sub>, filtered and concentrated under reduced pressure with the aid of a rotary evaporator. The crude material was purified by flash column chromatography to provide the corresponding indoline derivative.

*Hydroxyindole (ether solution) synthesis*: A solution of sodium tungstate dihydrate (0.66 g, 2.0 mmol, 0.2 equiv) in water (10 mL) was added to a solution of the indoline derivative (10 mmol,

1.0 equiv) in MeOH (50 mL) and the mixture was cooled to 0 °C in an ice/water bath. Hydrogen peroxide aqueous solution (30%, 10 equiv) was added to the resultant solution slowly at 0 °C while stirring (10 min). Upon the complete addition, the ice bath was removed and the reaction mixture was stirred for another 10 min before quenched with water (200 mL) and extracted with Et<sub>2</sub>O (100 mL × 3). The aqueous solution was treated with sat. sodium sulfite solution (Na<sub>2</sub>SO<sub>3</sub>, 50 equiv) to quench the excess hydrogen peroxide. The combined organic layers were concentrated under reduced pressure with the aid of a rotary evaporator until all the MeOH was removed. The residue was redissolved in Et<sub>2</sub>O (100 mL), washed with brine, and dried over Na<sub>2</sub>SO<sub>4</sub>.

*Indole electrophile synthesis from hydroxyindoles*: see Method A.

### Characterization Data for Indole Electrophiles

#### 1*H*-indol-1-yl benzoate (**2a**)

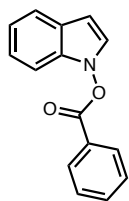

Method A was followed using 1-methyl-2-nitrobenzene (5.49 g, 40.0 mmol, 1.0 equiv) and benzoyl chloride (6.19 g, 44 mmol, 1.1 equiv). The crude material was first purified by a silica gel column (Hexanes ~ Hexanes : EtOAc = 10:1), and subsequently an aluminum oxide (activated, basic, Brockmann I) column (Hexanes ~ Hexanes : EtOAc = 10:1) to provide the title compound as a white solid in 51% yield (4.84 g). (The extra basic alumina column was performed to get rid of benzoic anhydride which was difficult to separate from **2a** on silica gel). m.p. 58-60 °C. <sup>1</sup>H NMR (400 MHz, CDCl<sub>3</sub>) δ 8.27 (dd, *J* = 8.3 Hz, *J* = 1.4 Hz, 2H), 7.80–7.72 (m, 1H), 7.68 (d, *J* = 7.9 Hz, 1H), 7.61 (t, *J* = 7.8 Hz, 2H), 7.36–7.17 (m, 4H), 6.60 (d, *J* = 3.2 Hz, 1H) ppm. <sup>13</sup>C NMR (101 MHz, CDCl<sub>3</sub>) δ 164.7, 134.7, 134.3, 130.3, 129.0, 126.4, 125.5, 124.8, 123.1, 121.4, 120.9, 108.5, 100.4 ppm. IR (thin film) 3059, 1766, 1451, 1319, 1232, 1179, 1037, 996, 736, 698 cm<sup>-1</sup>. EA Calcd. for C<sub>15</sub>H<sub>11</sub>NO<sub>2</sub>: C, 75.94; H, 4.67. Found: C, 76.12; H, 4.86.

#### 1*H*-indol-1-yl 4-(dimethylamino)benzoate (**2b**)

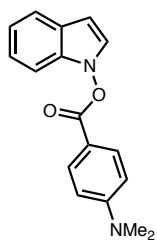

Method A was followed using 1-methyl-2-nitrobenzene (5.49 g, 40.0 mmol, 1.0 equiv) and 4-(dimethylamino)benzoyl chloride (8.08 g, 44 mmol, 1.1 equiv). The crude material was purified by flash column chromatography (Hexanes ~ Hexanes : EtOAc = 5:1) to provide the title compound as a white solid in 36% yield (4.04 g). m.p. 138-140 °C. <sup>1</sup>H NMR (400 MHz, CDCl<sub>3</sub>) δ 8.08 (d, *J* = 9.1 Hz, 2H), 7.63

(dt,  $J = 7.8$  Hz,  $J = 1.0$  Hz, 1H), 7.31–7.19 (m, 3H), 7.17–7.10 (m, 1H), 6.73 (d,  $J = 9.1$  Hz, 2H), 6.53 (dd,  $J = 3.5$  Hz,  $J = 0.9$  Hz, 1H), 3.11 (s, 6H) ppm.  $^{13}\text{C}$  NMR (101 MHz,  $\text{CDCl}_3$ )  $\delta$  164.9, 154.2, 134.2, 132.2, 125.6, 124.6, 122.8, 121.2, 120.4, 112.0, 110.9, 108.5, 99.5, 40.1 ppm. IR (thin film) 2915, 1748, 1599, 1531, 1372, 1258, 1169, 1034, 980, 753  $\text{cm}^{-1}$ . EA Calcd. for  $\text{C}_{17}\text{H}_{16}\text{N}_2\text{O}_2$ : C, 72.84; H, 5.75. Found: C, 72.89; H, 5.88.

### 1*H*-indol-1-yl 4-(trifluoromethyl)benzoate (**2c**)

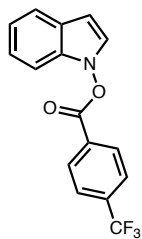

Method A was followed using 1-methyl-2-nitrobenzene (5.49 g, 40.0 mmol, 1.0 equiv) and 4-(trifluoromethyl)benzoyl chloride (9.18 g, 44 mmol, 1.1 equiv). The crude material was purified by flash column chromatography (Hexanes ~ Hexanes : EtOAc = 10:1) to provide the title compound as a white solid in 45% yield (5.49 g). m.p. 103-108 °C.  $^1\text{H}$  NMR (400 MHz,  $\text{CDCl}_3$ )  $\delta$  8.28 (d,  $J = 3.5$  Hz, 2H), 7.77 (d,  $J = 8.3$  Hz, 2H), 7.57 (d,  $J = 7.8$  Hz, 1H), 7.25–7.15 (m, 3H), 7.14–7.07 (m, 1H), 6.50 (d,  $J = 8.1$  Hz, 1H), ppm.  $^{13}\text{C}$  NMR (101 MHz,  $\text{CDCl}_3$ )  $\delta$  163.6, 136.0 (q,  $J = 32.9$  Hz), 134.5, 130.7, 126.4 (q,  $J = 3.6$  Hz), 125.6, 124.9, 124.7, 123.3 (q,  $J = 273.0$  Hz), 123.4, 121.5, 121.2, 108.5, 101.0 ppm.  $^{19}\text{F}$  NMR (376 MHz,  $\text{CDCl}_3$ )  $\delta$  -63.3 ppm. IR (thin film) 1775, 1412, 1321, 1233, 1171, 1128, 1065, 1039, 1000, 858, 736, 695  $\text{cm}^{-1}$ . EA Calcd. for  $\text{C}_{16}\text{H}_{10}\text{F}_3\text{NO}_2$ : C, 62.96; H, 3.30. Found: C, 63.12; H, 3.48.

### 1*H*-indol-1-yl 2,4,6-trimethylbenzoate (**2d**)

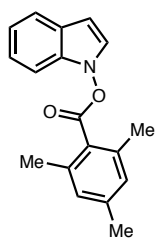

Method A was followed using 1-methyl-2-nitrobenzene (5.49 g, 40.0 mmol, 1.0 equiv) and 2,4,6-trimethylbenzoyl chloride (8.04 g, 44 mmol, 1.1 equiv). The crude material was first purified by a silica gel column (Hexanes ~ Hexanes : EtOAc = 10:1), and subsequently an aluminum oxide (activated, basic, Brockmann I) column (Hexanes ~ Hexanes : EtOAc = 10:1) to provide the title compound as a white solid in 41% yield (4.58 g). (The extra basic alumina column was performed to get rid of 2,4,6-trimethylbenzoic anhydride which was difficult to separate from **2d** on silica gel). m.p. 80-82 °C.  $^1\text{H}$  NMR (400 MHz,  $\text{CDCl}_3$ )  $\delta$  7.69 (dt,  $J = 7.9$  Hz,  $J = 1.0$  Hz, 1H), 7.38 (dd,  $J = 8.1$  Hz,  $J = 1.1$  Hz, 1H), 7.35–7.30 (m, 1H), 7.29 (d,  $J = 3.5$  Hz, 1H), 7.21 (ddd,  $J = 8.1$  Hz,  $J = 7.0$  Hz,  $J = 1.2$  Hz, 1H), 7.01 (s, 2H), 6.60 (dd,  $J = 3.5$  Hz,  $J = 0.9$  Hz, 1H), 2.56 (s, 6H), 2.38 (s, 3H) ppm.  $^{13}\text{C}$  NMR (101 MHz,  $\text{CDCl}_3$ )  $\delta$  168.0, 141.3, 136.4, 134.3, 128.9, 126.4, 125.3, 124.9, 123.2,



121.4, 120.9, 108.7, 100.4, 21.3, 20.3 ppm. IR (thin film) 1780, 1610, 1445, 1222, 1155, 1028, 982, 946, 734, 699  $\text{cm}^{-1}$ . EA Calcd. for  $\text{C}_{18}\text{H}_{17}\text{NO}_2$ : C, 77.40; H, 6.13. Found: C, 77.49; H, 6.06.

### 6-(trifluoromethyl)-1*H*-indol-1-yl 2,4,6-trimethylbenzoate (2e)

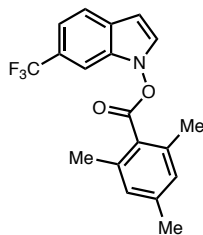

Method A was followed using 1-methyl-2-nitro-4-(trifluoromethyl)benzene (2.05 g, 10.0 mmol, 1.0 equiv) and 2,4,6-trimethylbenzoyl chloride (2.01 g, 11 mmol, 1.1 equiv). The crude material was purified by flash column chromatography (Hexanes ~ Hexanes : EtOAc = 10:1) to provide the title compound as a white solid in 38% yield (1.32 g). m.p. 66-68 °C.  $^1\text{H}$  NMR (400 MHz,  $\text{CDCl}_3$ )  $\delta$  7.74 (d,  $J = 8.3$  Hz, 1H), 7.66 (s, 1H), 7.43–7.37 (m, 2H), 7.00 (s, 2H), 6.63 (dd,  $J = 3.5$  Hz,  $J = 0.9$  Hz, 1H), 2.53 (s, 6H), 2.36 (s, 3H) ppm.  $^{13}\text{C}$  NMR (101 MHz,  $\text{CDCl}_3$ )  $\delta$  124.8 (d,  $J = 271.6$  Hz) 167.7, 141.6, 136.6, 132.8, 129.0, 127.5, 126.9, 125.7, 125.4 (d,  $J = 32.2$  Hz), 125.4 (d,  $J = 32.2$  Hz), 121.9, 117.4 (q,  $J = 3.6$  Hz), 106.1 (q,  $J = 4.4$  Hz), 100.2, 21.3, 20.3 ppm.  $^{19}\text{F}$  NMR (376 MHz,  $\text{CDCl}_3$ )  $\delta$  -61.1 ppm. IR (thin film) 1786, 1611, 1449, 1228, 1280, 1224, 1154, 1114, 1053, 979  $\text{cm}^{-1}$ . HRMS (DART)  $m/z$  calcd. for  $\text{C}_{19}\text{H}_{17}\text{NO}_2\text{F}_3^+$   $[\text{M}+\text{H}]^+$ : 348.1206; found 348.1197.

### *tert*-butyl 1-((2,4,6-trimethylbenzoyl)oxy)-1*H*-indole-4-carboxylate (2f)

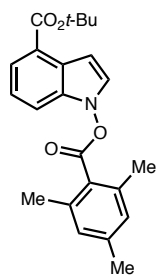

Method A was followed using *tert*-butyl 2-methyl-3-nitrobenzoate (2.37 g, 10.0 mmol, 1.0 equiv) and 2,4,6-trimethylbenzoyl chloride (2.01 g, 11.0 mmol, 1.1 equiv). The crude material was purified by flash column chromatography (Hexanes ~ Hexanes : EtOAc = 6:1) to provide the title compound as a white solid in 32% yield (1.21 g). m.p. 66-68 °C.  $^1\text{H}$  NMR (400 MHz,  $\text{CDCl}_3$ )  $\delta$  7.92 (dd,  $J = 7.4$  Hz,  $J = 1.1$  Hz, 1H), 7.50 (d,  $J = 8.2$  Hz, 1H), 7.36 (d,  $J = 3.5$  Hz, 1H), 7.31 (t,  $J = 7.8$  Hz, 1H), 7.20 (dd,  $J = 3.6$  Hz,  $J = 1.0$  Hz, 1H), 6.99 (s, 2H), 2.53 (s, 6H), 2.36 (s, 3H), 1.68 (s, 9H) ppm.  $^{13}\text{C}$  NMR (101 MHz,  $\text{CDCl}_3$ )  $\delta$  167.8, 166.3, 141.4, 136.5, 134.7, 129.0, 126.5, 126.1, 124.2, 124.1, 124.0, 122.4, 112.8, 101.5, 81.1, 28.4, 21.3, 20.3 ppm. IR (thin film) 2976, 2925, 1786, 1289, 1226, 1162, 1141, 982, 750  $\text{cm}^{-1}$ . HRMS (DART)  $m/z$  calcd. for  $\text{C}_{23}\text{H}_{26}\text{NO}_4^+$   $[\text{M}+\text{H}]^+$ : 380.1856; found 380.1860.

### 2-methyl-1*H*-indol-1-yl 2,4,6-trimethylbenzoate (**2g**)

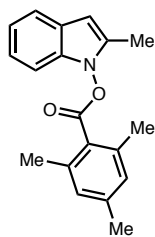

Method B was followed using 2-methylindoline (1.33 g, 10.0 mmol, 1.0 equiv) and 2,4,6-trimethylbenzoyl chloride (2.01 g, 11 mmol, 1.1 equiv). The crude material was first purified by a silica gel column (Hexanes ~ Hexanes : EtOAc = 10:1), and subsequently an aluminum oxide (activated, basic, Brockmann I) column (Hexanes ~ Hexanes : EtOAc = 10:1) to provide the title compound as a white solid in 28% yield (0.821 g). (The extra basic alumina column was performed to get rid of 2,4,6-trimethylbenzoic anhydride which was difficult to separate from **2g** on silica gel). m.p. 66-68 °C. <sup>1</sup>H NMR (400 MHz, CDCl<sub>3</sub>) δ 7.56 (d, *J* = 7.8 Hz, 1H), 7.31 (d, *J* = 8.0 Hz, 1H), 7.22 (t, *J* = 7.8 Hz, 1H), 7.15 (t, *J* = 7.5 Hz, 1H), 7.01 (s, 2H), 6.31 (s, 1H), 2.61 (s, 6H), 2.49 (s, 3H), 2.40 (s, 3H) ppm. <sup>13</sup>C NMR (101 MHz, CDCl<sub>3</sub>) δ 168.0, 141.3, 136.7, 135.2, 134.7, 129.1, 126.4, 124.9, 122.0, 120.8, 120.3, 108.3, 98.4, 21.3, 20.8, 12.1 ppm. IR (thin film) 2921, 1777, 1611, 1449, 1220, 1155, 785, 738 cm<sup>-1</sup>. EA Calcd. for C<sub>19</sub>H<sub>19</sub>NO<sub>2</sub>: C, 77.79; H, 6.53. Found: C, 77.94; H, 6.38.

### 4-methyl-1*H*-indol-1-yl 2,4,6-trimethylbenzoate (**2h**)

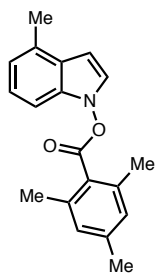

Method A was followed using 1,2-dimethyl-3-nitrobenzene (1.51 g, 10.0 mmol, 1.0 equiv) and 2,4,6-trimethylbenzoyl chloride (2.01 g, 11 mmol, 1.1 equiv). The crude material was first purified by a silica gel column (Hexanes ~ Hexanes : EtOAc = 10:1), and subsequently an aluminum oxide (activated, basic, Brockmann I) column (Hexanes ~ Hexanes : EtOAc = 10:1) to provide the title compound as a white solid in 43% yield (1.23 g). (The extra basic alumina column was performed to get rid of 2,4,6-trimethylbenzoic anhydride which was difficult to separate from **2h** on silica gel). m.p. 105-108 °C. <sup>1</sup>H NMR (400 MHz, CDCl<sub>3</sub>) δ 7.28 (d, *J* = 2.1 Hz, 1H), 7.23–7.19 (m, 2H), 7.05–6.95 (m, 3H), 6.61 (d, *J* = 3.5 Hz, 1H), 2.60 (s, 3H), 2.56 (s, 6H), 2.38 (s, 3H) ppm. <sup>13</sup>C NMR (101 MHz, CDCl<sub>3</sub>) δ 168.0, 141.2, 136.4, 133.84, 130.8, 128.9, 126.4, 124.5, 124.4, 123.3, 121.0, 106.2, 98.7, 21.3, 20.3, 18.3 ppm. IR (thin film) 2920, 1780, 1610, 1453, 1226, 1153, 1001, 982, 742, 697 cm<sup>-1</sup>. EA Calcd. for C<sub>19</sub>H<sub>19</sub>NO<sub>2</sub>: C, 77.79; H, 6.53. Found: C, 78.01; H, 6.76.

### 6-chloro-1*H*-indol-1-yl 2,4,6-trimethylbenzoate (**2i**)

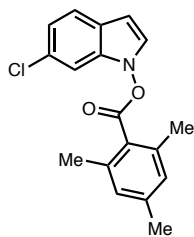

Method A was followed using 4-chloro-1-methyl-2-nitrobenzene (1.72 g, 10.0 mmol, 1.0 equiv) and 2,4,6-trimethylbenzoyl chloride (2.01 g, 11 mmol, 1.1 equiv). The crude material was first purified by a silica gel column (Hexanes ~ Hexanes : EtOAc = 10:1), and subsequently an aluminum oxide (activated, basic, Brockmann I) column (Hexanes ~ Hexanes : EtOAc = 10:1) to provide the title compound as a white solid in 36% yield (1.13 g). (The extra basic alumina column was performed to get rid of 2,4,6-trimethylbenzoic anhydride which was difficult to separate from **2i** on silica gel). m.p. 75-77 °C. <sup>1</sup>H NMR (400 MHz, CDCl<sub>3</sub>) δ 7.57 (d, *J* = 8.4 Hz, 1H), 7.33 (s, 1H), 7.26 (d, *J* = 3.5 Hz, 1H), 7.17 (dd, *J* = 8.4 Hz, *J* = 1.8 Hz, 1H), 7.01 (s, 2H), 6.57 (dd, *J* = 3.5 Hz, *J* = 0.9 Hz, 1H), 2.55 (s, 6H), 2.38 (s, 3H) ppm. <sup>13</sup>C NMR (101 MHz, CDCl<sub>3</sub>) δ 167.7, 141.5, 136.6, 134.3, 129.3, 129.0, 125.9, 125.8, 123.3, 122.3, 121.6, 108.7, 100.3, 21.3, 20.4 ppm. IR (thin film) 2922, 1783, 1610, 1225, 1027, 980, 898, 801, 700 cm<sup>-1</sup>. HRMS (DART) *m/z* calcd. for C<sub>18</sub>H<sub>17</sub>NO<sub>2</sub>Cl<sup>+</sup> [M+H]<sup>+</sup>: 314.0942; found 314.0944.

### 3-(2-methoxyethyl)-1*H*-indol-1-yl 2,4,6-trimethylbenzoate (**2k**)

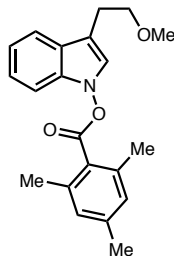

Method B was followed using 3-(2-methoxyethyl)indoline (1.77 g, 10.0 mmol, 1.0 equiv) and 2,4,6-trimethylbenzoyl chloride (2.01 g, 11 mmol, 1.1 equiv). The crude material was purified by flash column chromatography (Hexanes ~ Hexanes : EtOAc = 6:1) to provide the title compound as a yellow liquid/solid in 25% yield (0.844 g). <sup>1</sup>H NMR (400 MHz, CDCl<sub>3</sub>) δ 7.65 (d, *J* = 7.8 Hz, 1H), 7.36–7.27 (m, 2H), 7.21 (ddd, *J* = 8.0 Hz, *J* = 6.8 Hz, *J* = 1.3 Hz, 1H), 7.15 (s, 1H), 6.99 (s, 2H), 3.74 (t, *J* = 7.1 Hz, 2H), 3.43 (s, 3H), 3.08 (t, *J* = 7.1 Hz, 2H), 2.54 (s, 6H), 2.36 (s, 3H) ppm. <sup>13</sup>C NMR (101 MHz, CDCl<sub>3</sub>) δ 168.0, 141.1, 136.4, 135.6, 128.9, 126.7, 125.2, 123.8, 123.4, 120.7, 119.4, 112.2, 109.2, 72.5, 58.7, 25.6, 21.3, 20.3 ppm. IR (thin film) 2923, 1777, 1611, 1446, 1226, 1155, 1113, 1009, 982, 735 cm<sup>-1</sup>. HRMS (DART) *m/z* calcd. for C<sub>21</sub>H<sub>24</sub>NO<sub>3</sub><sup>+</sup> [M+H]<sup>+</sup>: 338.1751; found 338.1745.

## V. Preparation of Alkene Substrates

All the alkenes used in the paper are listed below. **1a**, **1b**, **1c**, **1d**, **1e**, **1j**, **1k**, **1l**, **1o**, **1q**, and **1r** were purchased from Alfa Aeser, Combi-Blocks or Sigma-Aldrich, and were used as received. **1f**<sup>5</sup>, **1g**<sup>6</sup>, **1m**<sup>7</sup>, **1n**<sup>8</sup>, **1p**<sup>9</sup>, **1t**<sup>10</sup>, **1u**<sup>11</sup> are known compounds and were prepared by previously reported procedures.

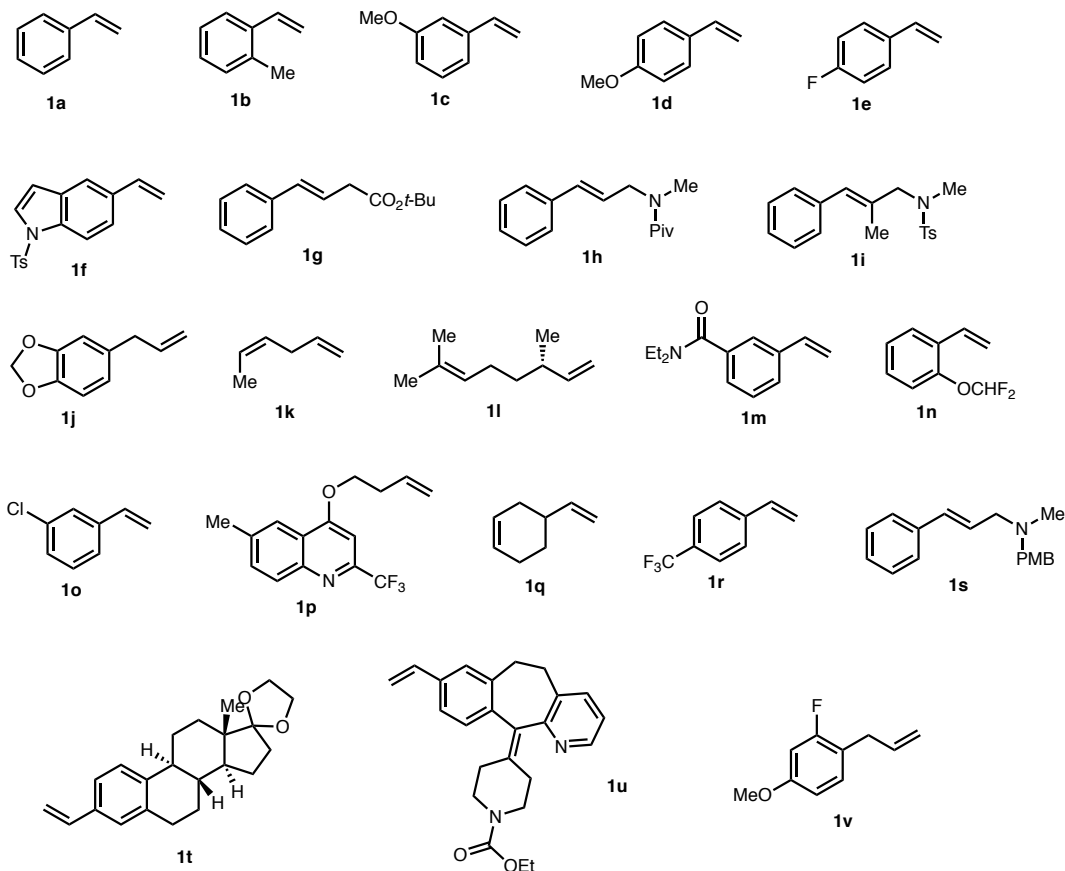

Synthesis of **1h**, **1s**, **1i**, **1v**.

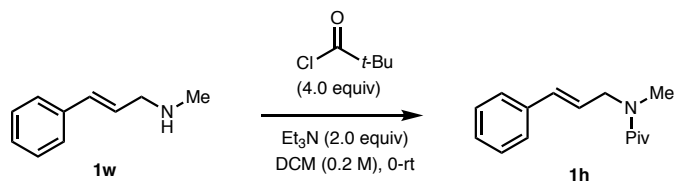

### *N*-cinnamyl-*N*-methylpivalamide (**1h**)

A 200 mL round bottom flask with a magnetic stir bar was charged with (*E*)-*N*-methyl-3-phenylprop-2-en-1-amine<sup>i</sup> (1.47 g, 10.0 mmol, 1.0 equiv), CH<sub>2</sub>Cl<sub>2</sub> (50 mL), and triethylamine (2.02 g, 20.0 mmol, 2.0 equiv). The reaction flask was cooled to 0 °C in an ice/water bath. Then

pivaloyl chloride (4.82 g, 40 mmol, 4.0 equiv) was added slowly via syringe. The ice bath was then removed and the reaction mixture was allowed to warm to rt and stirred overnight. The reaction mixture was diluted with CH<sub>2</sub>Cl<sub>2</sub> (50 mL) and quenched with saturated aqueous NaHCO<sub>3</sub> solution (100 mL). The aqueous phase was extracted with CH<sub>2</sub>Cl<sub>2</sub> (20 mL × 3) and the combined organic phases was dried over Na<sub>2</sub>SO<sub>4</sub>, filtered and concentrated under reduced pressure with the aid of a rotary evaporator. The crude material was purified by flash column chromatography (Hexanes ~ Hexanes : EtOAc = 1:1) to provide **1h** as liquid in 86% yield (1.99 g). <sup>1</sup>H NMR (400 MHz, CDCl<sub>3</sub>) δ 7.43–7.32 (m, 4H), 7.29–7.24 (m, 1H), 6.51 (d, *J* = 15.9 Hz, 1H), 6.18 (dt, *J* = 15.9 Hz, *J* = 6.1 Hz, 1H), 4.20 (d, *J* = 5.4 Hz, 2H), 3.07 (s, 3H), 1.35 (s, 9H) ppm. <sup>13</sup>C NMR (101 MHz, CDCl<sub>3</sub>) δ 177.5, 136.6, 132.5, 128.6, 127.7, 126.4, 125.0, 52.1, 38.9, 35.9, 28.4 ppm. IR (thin film) 2973, 1623, 1479, 1449, 1401, 1380, 1363, 1181, 1096, 966 cm<sup>-1</sup>. HRMS (DART) *m/z* calcd. for C<sub>15</sub>H<sub>22</sub>NO<sup>+</sup> [M+H]<sup>+</sup>: 232.1696; found 232.1684.

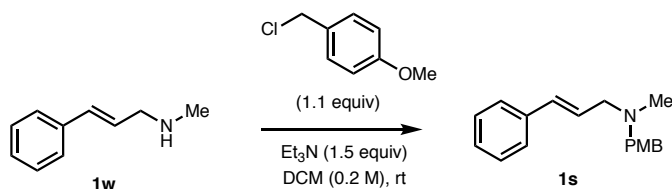

### **(E)-N-(4-methoxybenzyl)-N-methyl-3-phenylprop-2-en-1-amine (1s)**

A 200 mL round bottom flask with a magnetic stir bar was charged with (*E*)-*N*-methyl-3-phenylprop-2-en-1-amine (1.47 g, 10.0 mmol, 1.0 equiv), CH<sub>2</sub>Cl<sub>2</sub> (50 mL), and triethylamine (1.52 g, 15.0 mmol, 1.5 equiv). 1-(chloromethyl)-4-methoxybenzene (1.72 g, 40 mmol, 4.0 equiv) was added slowly via syringe and the reaction mixture was stirred overnight. The reaction mixture was diluted with CH<sub>2</sub>Cl<sub>2</sub> (50 mL) and quenched with saturated aqueous NaHCO<sub>3</sub> solution (100 mL). The aqueous phase was extracted with CH<sub>2</sub>Cl<sub>2</sub> (20 mL × 3) and the combined organic phases was dried over Na<sub>2</sub>SO<sub>4</sub>, filtered and concentrated under reduced pressure with the aid of a rotary evaporator. The crude material was purified by flash column chromatography (CH<sub>2</sub>Cl<sub>2</sub> ~ CH<sub>2</sub>Cl<sub>2</sub> : MeOH = 10:1) to provide **1s** as liquid in 88% yield (2.35 g). <sup>1</sup>H NMR (400 MHz, CDCl<sub>3</sub>) δ 7.47–7.20 (m, 7H), 6.90 (d, *J* = 8.1 Hz, 2H), 6.56 (d, *J* = 15.8 Hz, 1H), 6.34 (dt, *J* = 15.7 Hz, *J* = 6.6 Hz, 1H), 3.83 (s, 3H), 3.52 (s, 2H), 3.21 (d, *J* = 6.6 Hz, 2H), 2.26 (s, 3H) ppm. <sup>13</sup>C NMR (101 MHz, CDCl<sub>3</sub>) δ 158.7, 137.2, 132.5, 131.0, 130.3, 128.5, 127.7, 127.4, 126.3, 113.6, 61.2, 59.7, 55.3, 42.1 ppm. IR (thin film) 2832, 2783, 1611, 1510, 1495, 1242, 1035, 966, 805, 691 cm<sup>-1</sup>. EA Calcd. for C<sub>18</sub>H<sub>21</sub>NO: C, 80.86; H, 7.92. Found: C, 80.64; H, 8.11.

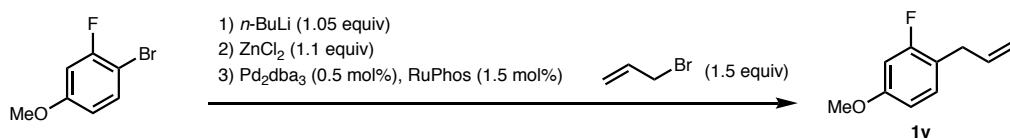

### 1-allyl-2-fluoro-4-methoxybenzene (**1v**)

A 300 mL round bottom flask with a magnetic stir bar was charged with 1-bromo-2-fluoro-4-methoxybenzene (10.3 g, 50.0 mmol, 1.0 equiv) and anhydrous tetrahydrofuran (THF, 60 mL) under argon. The reaction mixture was cooled to -78 °C with a dry ice/acetone bath followed by the slow addition of *n*-BuLi (2.5 M in THF, 1.05 equiv). The reaction mixture was allowed to stir at -78 °C for 45 min before the addition of solid ZnCl<sub>2</sub> (7.50 g, 55.0 mmol, 1.1 equiv) with a counter flow of argon. The reaction mixture was stirred at -78 °C for 1 h and then was allowed to warm to rt by removing the cooling bath. 3-bromoprop-1-ene (9.07 g, 75.0 mmol, 1.5 equiv), and a 10 mL THF solution of Pd<sub>2</sub>dba<sub>3</sub> (0.23 g, 0.25 mmol, 1% mol) and RuPhos (0.35 g, 0.75 mmol, 1.5% mmol) were added via syringe. The round bottom flask was fitted with a reflux condenser and the reaction mixture was heated at 60 °C for 1 h. After completion, the reaction mixture was cooled to rt and diluted with EtOAc (50 mL). The organic phase was sequentially washed with 1M HCl aqueous solution (50 mL × 2) and brine (50 mL). The combined organic phases was dried over Na<sub>2</sub>SO<sub>4</sub>, filtered and concentrated under reduced pressure with the aid of a rotary evaporator. The crude material was purified by flash column chromatography (Hexanes ~ Hexanes : CH<sub>2</sub>Cl<sub>2</sub> = 10:1) to provide **1v** as liquid in 47% yield (2.35 g). <sup>1</sup>H NMR (400 MHz, CDCl<sub>3</sub>) δ 7.08 (t, *J* = 8.5 Hz, 1H), 6.67–6.57 (m, 2H), 5.94 (ddt, *J* = 15.7 Hz, *J* = 11.1 Hz, *J* = 6.5 Hz, 1H), 5.07 (d, *J* = 1.5 Hz, 1H), 5.04 (dd, *J* = 6.9 Hz, *J* = 1.7 Hz, 1H), 3.78 (s, 3H), 3.34 (dd, *J* = 6.5 Hz, *J* = 1.6 Hz, 2H) ppm. <sup>13</sup>C NMR (101 MHz, CDCl<sub>3</sub>) δ 161.3 (d, *J* = 244.9 Hz), 159.3 (d, *J* = 11.0 Hz), 136.32, 130.8 (d, *J* = 6.7 Hz), 118.7 (d, *J* = 16.8 Hz), 115.7, 109.6 (d, *J* = 3.0 Hz), 101.5 (d, *J* = 26.2 Hz), 55.5, 32.4 (d, *J* = 2.8 Hz) ppm. <sup>19</sup>F NMR (376 MHz, CDCl<sub>3</sub>) δ -116.5 ppm. IR (thin film) 2911, 2837, 1624, 1506, 1278, 1152, 1111, 1032, 952, 914, 832 cm<sup>-1</sup>. HRMS (DART) *m/z* calcd. for C<sub>10</sub>H<sub>12</sub>OF<sup>+</sup> [M+H]<sup>+</sup>: 167.0867; found 167.0861.

## VI. Computational Details

All density functional theory<sup>12</sup> (DFT) calculations were performed using the Jaguar 9.1. Software of ab initio quantum chemistry programs.<sup>13</sup> Geometry optimizations were carried out with the Becke's three-parameter exchange functional<sup>14,15</sup> including Grimme's D3 dispersion correction<sup>16,17</sup> (B3LYP-D3), with the 6-31G\*\* basis set<sup>18</sup>. Cu was described by the LACVP basis set<sup>19-21</sup> which includes relativistic effective core potentials (ECP). The electronic energies were reevaluated by single point calculations using Dunning's correlation-consistent triple- $\zeta$  basis set, cc-pVTZ(-f)<sup>22</sup> which includes a double set of polarization functions. For Cu, a modified version of LACVP, designated as LACV3P containing the decontracted exponents to match the effective core potential with triple- $\zeta$  quality, was used. The zero-point energy (ZPE) and entropy corrections obtained from the vibrational calculations at the same level of theory as the geometry optimization (B3LYP-D3/6-31G\*\*/LACVP). Solvation energies were evaluated by a self-consistent reaction field (SCRF) approach<sup>23-25</sup> with the dielectric constant  $\epsilon = 7.6$  (THF) using the gas phase optimized structures. All values in the energy profile of SEGPHOS and Ph-BPE are relative free energies (kcal/mol) at 363.15 K and 313.15 K, respectively.

The energy components have been computed with the following protocol. The free energy in solution phase  $G(\text{sol})$  has been calculated as follows:

$$G(\text{sol}) = G(\text{gas}) + G(\text{solv}) \quad (1)$$

$$G(\text{gas}) = H(\text{gas}) - TS(\text{gas}) \quad (2)$$

$$H(\text{gas}) = E(\text{SCF}) + \text{ZPE} \quad (3)$$

$$\Delta E(\text{SCF}) = \sum E(\text{SCF}) \text{ for products} - \sum E(\text{SCF}) \text{ for reactants} \quad (4)$$

$$\Delta G(\text{sol}) = \sum G(\text{sol}) \text{ for products} - \sum G(\text{sol}) \text{ for reactants} \quad (5)$$

$G(\text{gas})$  is the free energy in gas phase;  $G(\text{solv})$  is the free energy of solvation as computed using the continuum solvation model;  $H(\text{gas})$  is the enthalpy in gas phase;  $T$  is the temperature;  $S(\text{gas})$  is the entropy in gas phase;  $E(\text{SCF})$  is the self-consistent field energy, i.e. "raw" electronic energy as computed from the SCF procedure and ZPE is the zero-point energy. Note that by entropy here we refer specifically to the vibrational/rotational/translational entropy of the solute(s); the entropy of the solvent is incorporated implicitly in the continuum solvation model.

## Full energy profile of SEGPPOS

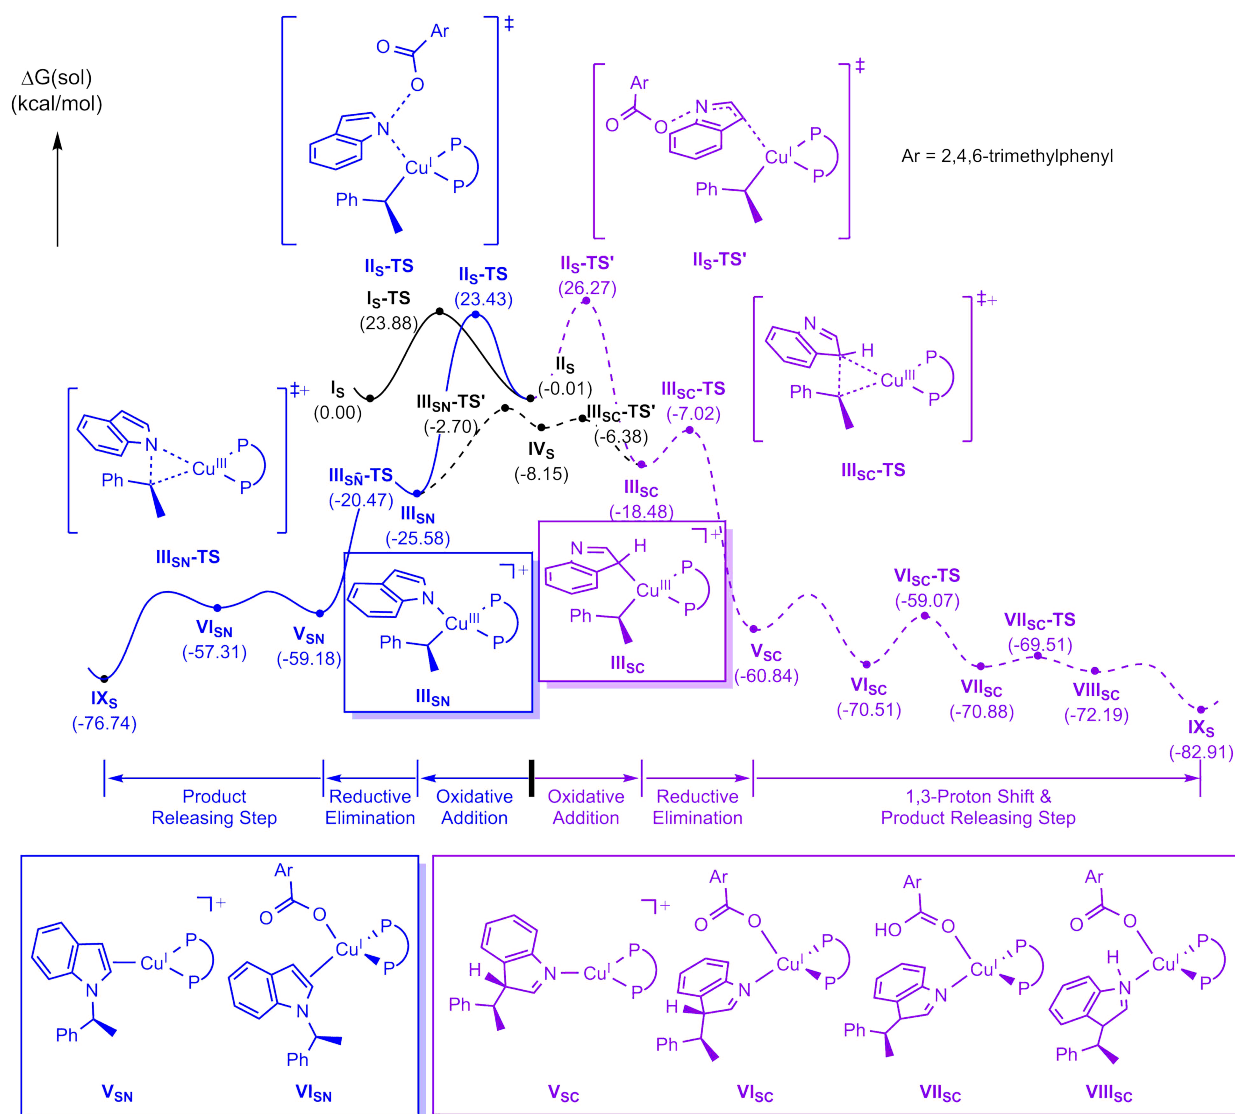

**Figure S1.** The energy profile of CuH-catalyzed alkylation of indoles with SEGPPOS.

Fig. S1 shows the DFT calculated energy profile for the CuH catalyzed indole alkylation reaction with the SEGPPOS ligand. Instead of DTBM-SEGPPOS, SEGPPOS which gives the same regioselectivity trend with DTBM-SEGPPOS in experiment is used for computational efficiency. The reaction begins with a hydrocupration that furnishes enantioenriched alkylcopper(I) intermediate **II<sub>s</sub>** with a barrier of 23.9 kcal/mol. After the olefin insertion step, the intermediate **II<sub>s</sub>** would perform either N- or C3-oxidative addition. As described in the main text, SEGPPOS ligand prefers to follow N-oxidative addition pathway which is colored blue in the energy profile across **II<sub>s</sub>-TS** with a barrier of 23.4 kcal/mol and forms cationic Cu(III) complex



**III<sub>SN</sub>**. This cationic complex **III<sub>SN</sub>** undergoes reductive elimination via **III<sub>SN</sub>-TS** with a negligible barrier of only 5.1 kcal/mol. Then, the association of the benzoate anion to the metal center of **V<sub>SN</sub>** affords **VI<sub>SN</sub>** which would subsequently release the N-alkylated indole as a product and the copper acetate **IX<sub>S</sub>**. The overall reaction is highly exothermic and thus thermodynamically favored.

### Full energy profile of Ph-BPE

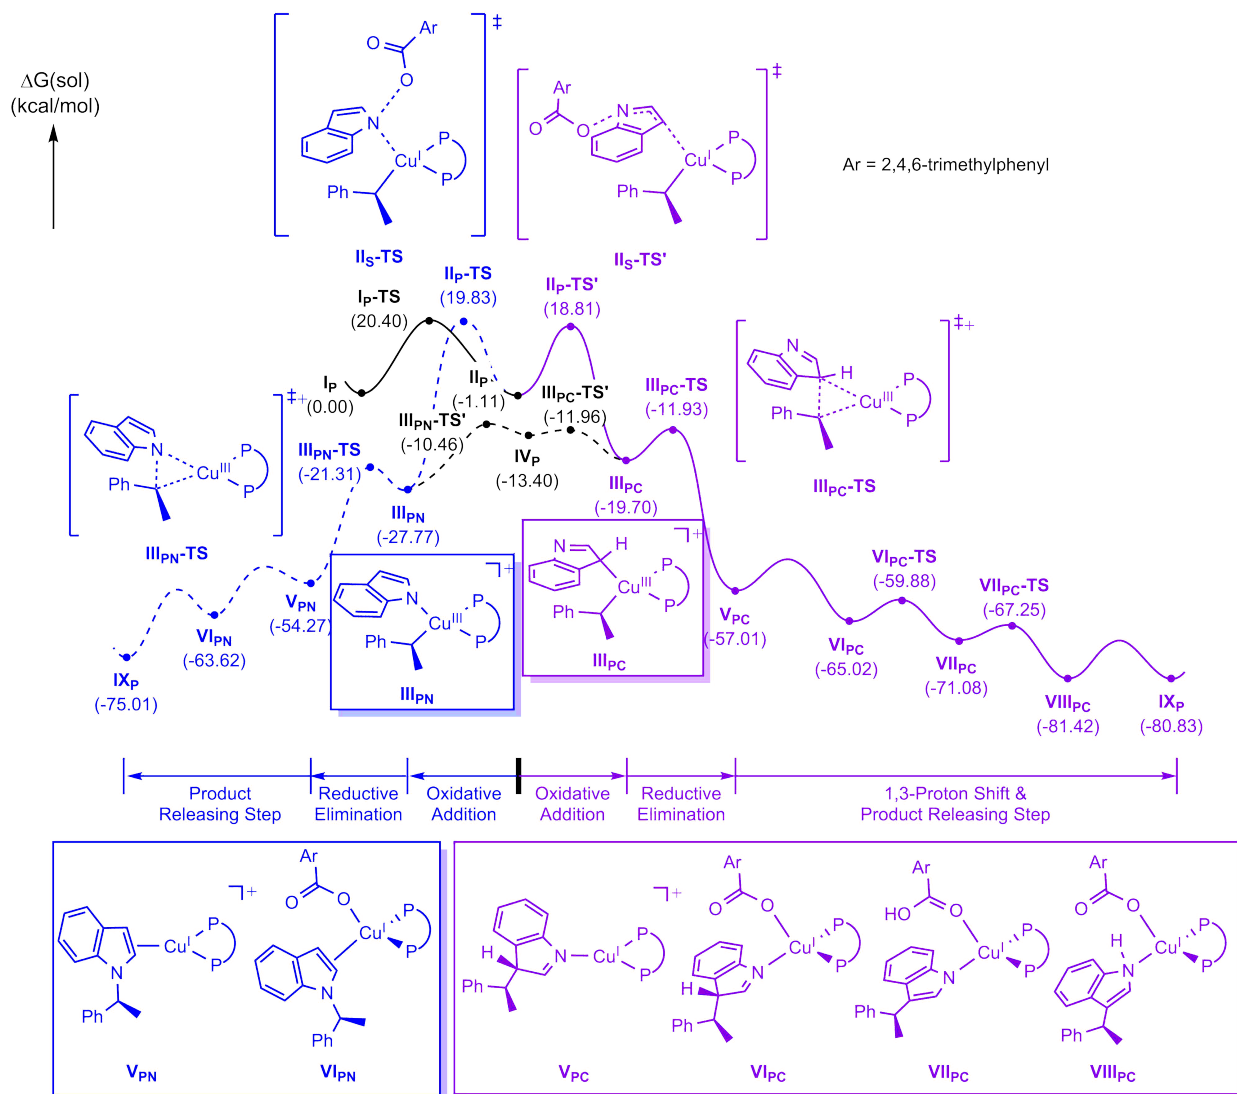

**Figure S2.** The energy profile of CuH-catalyzed alkylation of indoles with Ph-BPE.

Fig. S2 summarizes the DFT calculated energy profile for the CuH catalyzed indole alkylation reaction with Ph-BPE ligand. Whereas the alkylcopper(I) complex with SEGPHOS ligand prefers oxidative addition toward the N-position of indole substrate, the alkylcopper(I)

complex with Ph-BPE ligand, **II<sub>P</sub>** shows preference to C3-oxidative addition which is displayed in violet and as explained in the main text. After the C3-oxidative addition, the cationic Cu(III) complex **III<sub>PC</sub>** performs either reductive elimination which generates C3-alkylated indole product or 3,1-shift of indole which leads to N bound intermediate **III<sub>PN</sub>**. The reductive elimination step **III<sub>PC</sub>-TS** requires 7.8 kcal/mol while the 2,1-shift which is one part of 3,1-shift demands 9.2 kcal/mol of free energy. Although the barrier for **III<sub>PC</sub>-TS** is slightly lower only by 1.5 kcal/mol than that for **III<sub>PN</sub>-TS'**, we assume that the reductive elimination may take place dominantly due to the different pre-exponential factors in two steps. The isomerization, however, may happen occasionally and lower the regio-selectivity. The formation of **V<sub>PC</sub>** across **III<sub>PC</sub>-TS** is highly exergonic and thus this reaction is irreversible. Next, association of a benzoate anion to the metal center of **V<sub>PC</sub>** yields intermediate **VI<sub>PC</sub>**. Since the  $\gamma$ -hydrogen in indole moiety of **VI<sub>PC</sub>** is very acidic, the benzoate deprotonate it with a small barrier of 5.2 kcal/mol to give intermediate **VII<sub>PC</sub>**. A protonation of the nitrogen in the substrate generates intermediate **VIII<sub>PC</sub>** and the C–C coupled product with the copper(I) acetate **IX<sub>P</sub>** can finally be released.

### Hydrocupration which determines enantioselectivity

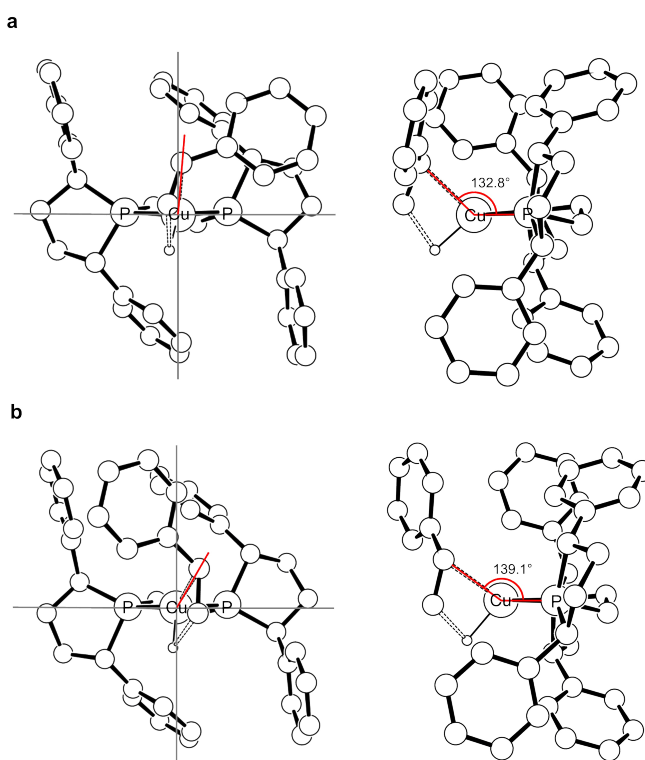

**Figure S3.** The front and side view of optimized structures of **a**, **I<sub>P</sub>-TS** and **b**, **I<sub>P</sub>-TS'**. Hydrogen atoms are omitted for clarification.

The enantioselectivity is determined in the hydrocupration step in the early stage of the reaction. The chiral ligand imposes a steric hindrance when an asymmetric alkene substrate approaches to the CuH catalyst. The transition state **I<sub>p</sub>-TS** and **I<sub>p</sub>-TS'** are related with forming a (S) and (R) form of the subsequent alkylcopper(I) intermediate, respectively. Compared to **I<sub>p</sub>-TS**, there is a steric clash between a phenyl of the ligand and that of the substrate in **I<sub>p</sub>-TS'**. To release this steric hindrance, the alkene substrate is distorted as shown in Fig. S3 b). In **I<sub>p</sub>-TS'**, a benzylic carbon is further away from the virtual central axis which is denoted in gray color and an angle between a P-Cu-P plane and the benzylic carbon is larger than those in **I<sub>p</sub>-TS**. These distortions finally weaken the orbital interaction between the substrate and CuH catalyst and increase the hydrocupration barrier. Our DFT calculations show that the barrier for **I<sub>p</sub>-TS** is 5.0 kcal/mol higher in energy than that for **I<sub>p</sub>-TS'**. Thus, the styrene substrate is selectively inserted into CuH catalyst via **I<sub>p</sub>-TS**, which forms the enantioenriched alkylcopper(I) intermediate **II<sub>p</sub>**.

### Reason for the low yield when C3-substituted indole is used for the substrate.

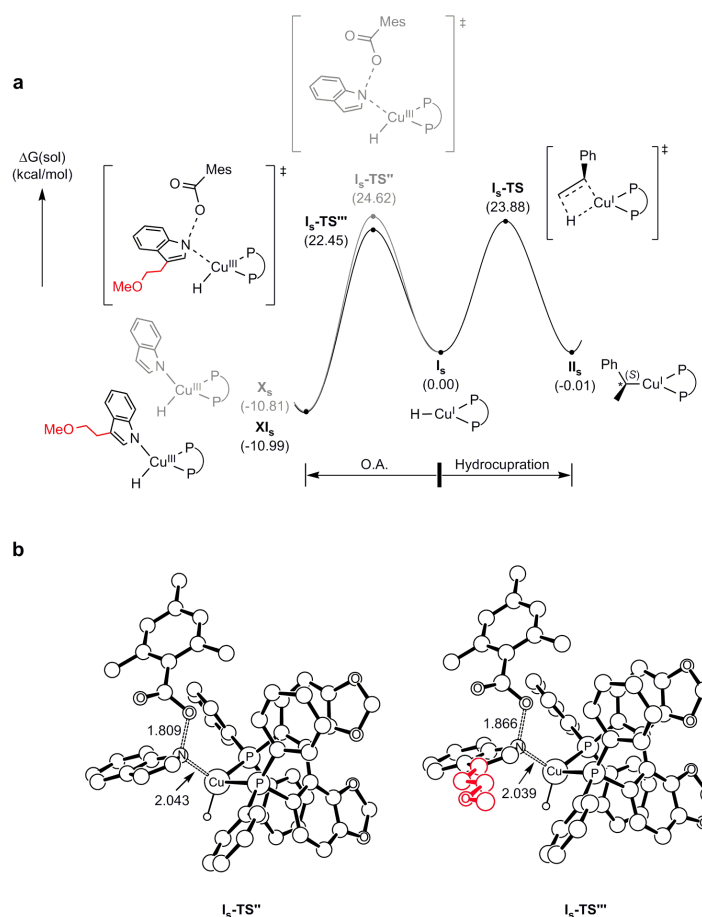

**Figure S4.** (a) The energy profile of two competitive pathways from  $I_S$ ; oxidative addition and hydrocupration. (b) The optimized structure for  $I_S$ -TS'' and  $I_S$ -TS'''. All hydrogens except the hydride is omitted for clarification

The CuH catalyst  $I_S$  can react with either indole or styrene substrates as shown in Fig. S4a. As a reason for the low yield in C3-substituted indole substrate, we presume that there is a competitive side reaction involving the transition state denoted as  $I_S$ -TS'''. In the absence of the C3-substitution at the indole substrate, the hydrocupration which leads to the formation of the desired alkylated product through  $I_S$ -TS is relatively facile than the side reaction which is the direct oxidative addition of indole substrate across  $I_S$ -TS''. The oxidative addition step is computed to have 0.7 kcal/mol higher in energy than the hydrocupration step. In the case of C3-substituted indole substrate, however, the oxidative addition transition state  $I_S$ -TS''' associated with a barrier of 22.5 kcal/mol which requires 1.4 kcal/mol lower energy than  $I_S$ -TS. In other words, the C3-substitution lowers 2.2 kcal/mol of oxidative addition barrier.

We found that the barrier difference between  $I_S$ -TS'' and  $I_S$ -TS''' is mainly contributed by the variance of interaction energy between the indole moiety and the alkylcopper(I) moiety. With the C3-substitution, the transition state shows ~4 kcal/mol stronger interaction energy in the gas phase. We found that this interaction energy preference mostly originates from 2.7 kcal/mol of van der Waals interaction between C3-substituent and the ligand as shown in Fig. S4 b. Based on this result, we also suppose that the low yield of N-alkylated product using C3-substituted indole with DTBM-SEGPHOS is due to the side-reaction of direct indolyl-benzoate reduction.

## Energy decomposition analysis

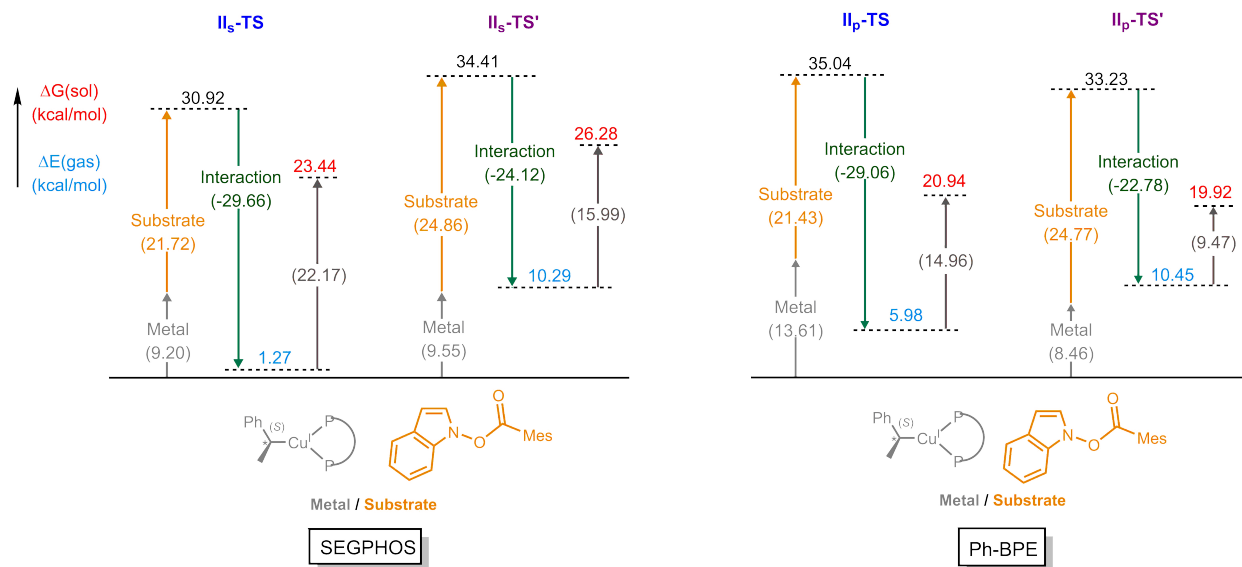

**Figure S5.** Energy decomposition analysis of transition states **II-TS** and **II-TS'** depending on the ligand

To understand the computed energy differences, we carried out an energy decomposition analysis of the transition states **II-TS** and **II-TS'**. As illustrated in Fig. S5, the transition state was partitioned into substrate and metal fragments. The energies labeled “substrate” in yellow and “metal” in grey represent the distortion energies of each fragments during the structural transformation from the ground to the transition states. The interaction energy between the two fragments is shown in green. This intuitive decomposition scheme divides the electronic energy of the transition state into three chemically meaningful components. In addition, the free energy which involves entropy and solvation corrections are shown in red.

In the case of SEGPHOS system, the distortion energies of the metal fragments are nearly identical in both transition states, but **II<sub>S</sub>-TS** requires 3.1 kcal/mol less distortion energy in the substrate fragment than **II<sub>S</sub>-TS'**. Furthermore, the interaction energy in **II<sub>S</sub>-TS** is greater by 5.5 kcal/mol, which is easy to understand, since the polarity inversion makes the indole-*N* a better electrophile. Taken together, the electronic barrier of **II<sub>S</sub>-TS** is ~9 kcal/mol lower than that of **II<sub>S</sub>-TS'**. The free energy correction attenuates the preference to **II<sub>S</sub>-TS** since the solvation penalty of **II<sub>S</sub>-TS** is more substantial due to the reduced exposure of the highly polarized N–O bond. Despite the substantial solvation penalty, the electronic energy difference of 9 kcal/mol allows **II<sub>S</sub>-TS** to have a free energy barrier that is ~3 kcal/mol lower. In contrast, the Ph-BPE

system shows reversed energy ordering in the transition states. Whereas the interaction energy and distortion of substrate fragment show similar trends compared to the SEGPHOS system, the distortion energy of metal fragment is markedly different: The metal fragment in **II<sub>p</sub>-TS** is distorted more, affording a 5.2 kcal/mol of distortion energy difference due to the architecture of Ph-BPE ligand. Overall, the electronic energy difference between **II<sub>p</sub>-TS** and **II<sub>p</sub>-TS'** becomes 4.5 kcal/mol, which is smaller than the difference in the SEGPHOS case. As a result, the small electronic energy gap is overwhelmed by the 5.5 kcal/mol of correction energy variance and gives reversed preference toward C3-oxidative addition.

### **Catalyst distortion during the N-oxidative addition.**

As discussed in the main text, the N-oxidative addition demands higher metal fragment distortion in the Ph-BPE system. Fig. S6 reveals the factors that determine the distortion energy. This distortion of the metal fragment is reflected in the Cu–P bond length and the angle between P–Cu–P plane and the  $\alpha$ -carbon of the styrene. Whereas Cu–P bond of the metal fragment in **II<sub>s</sub>-TS** is elongated by 0.048 Å and the styrene moiety is bent 26.1°, that in **II<sub>p</sub>-TS** is elongated by 0.121 Å and the styrene moiety is bent 31.3°. Consequently, we concluded that the architecture of Ph-BPE is not proper for the N-oxidative addition which results in the preference to the C3-oxidative addition pathway.

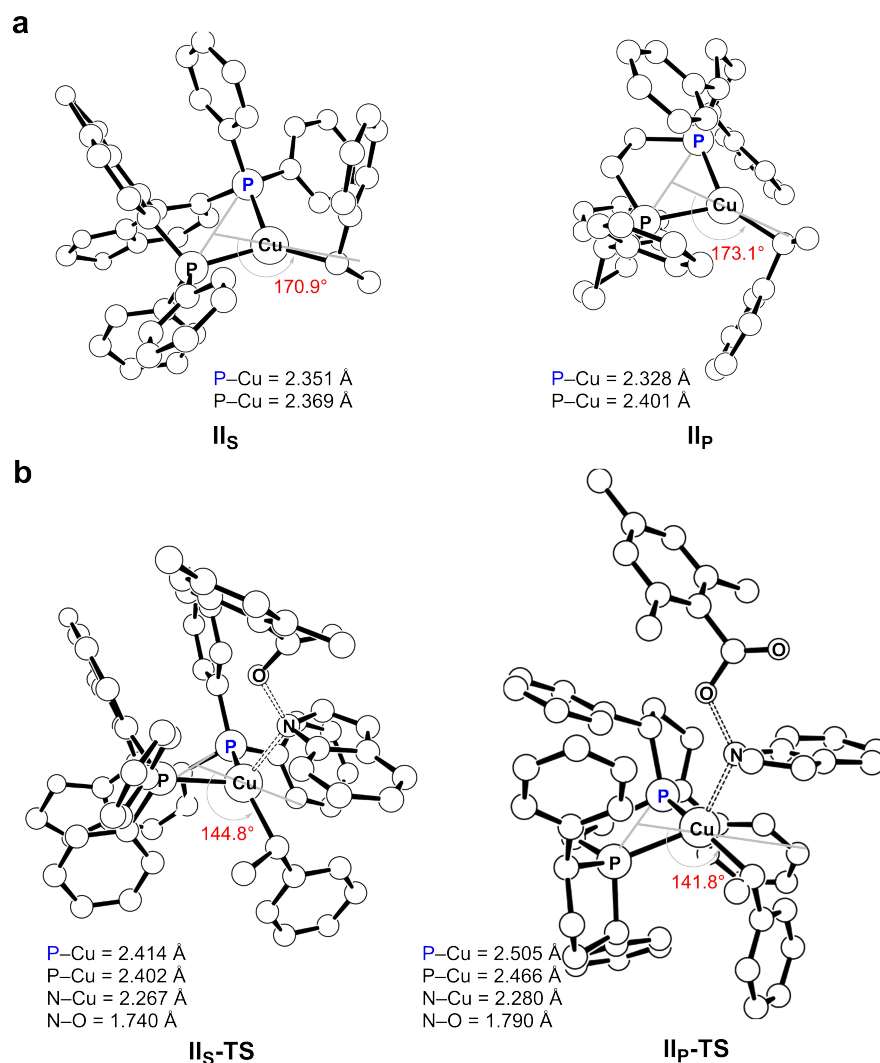

**Figure S6. DFT optimized geometries.** (a) Side view of II<sub>S</sub> and II<sub>P</sub>. b, II<sub>S</sub>-TS and II<sub>P</sub>-TS. Hydrogen atoms are omitted for clarification. (b) Side view of II<sub>S</sub>-TS and II<sub>P</sub>-TS.

**Table S4. Computed energy components for DFT-optimized structures**

|                                                 | E(SCF)/(eV)          | ZPE/(kcal/mol)  | S(gas)/(cal/mol) | G(soln)/(kcal/mol) |
|-------------------------------------------------|----------------------|-----------------|------------------|--------------------|
|                                                 | cc-pVTZ(-f)/LACV3P** | 6-31G**/LACVP** | 6-31G**/LACVP**  | 6-31G**/LACVP**    |
| styrene                                         | -8428.928            | 83.82           | 82.75            | -3.08              |
| 1 <i>H</i> -indol-1-yl<br>trimethylbenz<br>oate | -24534.758           | 192.97          | 142.54           | -7.47              |
| C3-<br>substituted<br>benzoate                  | -29792.582           | 248.96          | 176.46           | -8.99              |

|                             |             |        |         |        |
|-----------------------------|-------------|--------|---------|--------|
| trimethylbenz<br>oate       | -14650.915  | 115.96 | 107.97  | -56.79 |
| <b>3a</b>                   | -18333.031  | 168.16 | 117.54  | -5.74  |
| <b>4a</b>                   | -18333.162  | 168.16 | 117.28  | -7.67  |
| <b>I<sub>S</sub></b>        | -72000.119  | 355.55 | 241.41  | -22.50 |
| <b>IX<sub>S</sub></b>       | -86635.578  | 469.87 | 294.67  | -18.75 |
| <b>I<sub>P</sub></b>        | -59793.922  | 387.34 | 216.215 | -17.48 |
| <b>IX<sub>P</sub></b>       | -74429.217  | 501.56 | 272.287 | -11.97 |
| <b>I<sub>S</sub>-TS</b>     | -80429.359  | 440.54 | 270.69  | -15.09 |
| <b>I<sub>S</sub>-TS'</b>    | -80429.266  | 441.52 | 260.87  | -15.11 |
| <b>II<sub>S</sub></b>       | -80430.508  | 443.50 | 271.62  | -15.11 |
| <b>II<sub>S</sub>-TS</b>    | -104965.211 | 636.53 | 363.88  | -18.73 |
| <b>III<sub>SN</sub></b>     | -90312.430  | 520.40 | 303.45  | -36.54 |
| <b>III<sub>SN</sub>-TS</b>  | -90312.172  | 519.80 | 303.22  | -36.87 |
| <b>V<sub>SN</sub></b>       | -90313.969  | 521.68 | 301.28  | -36.72 |
| <b>VI<sub>SN</sub></b>      | -104968.859 | 639.58 | 360.77  | -19.52 |
| <b>II<sub>S</sub>-TS'</b>   | -104964.820 | 635.04 | 368.20  | -21.85 |
| <b>III<sub>SC</sub></b>     | -90312.039  | 520.59 | 298.43  | -40.47 |
| <b>III<sub>SC</sub>-TS</b>  | -90311.469  | 519.90 | 302.81  | -39.87 |
| <b>V<sub>SC</sub></b>       | -90314.040  | 521.24 | 302.50  | -35.85 |
| <b>VI<sub>SC</sub></b>      | -104969.153 | 637.69 | 371.76  | -20.05 |
| <b>VI<sub>SC</sub>-TS</b>   | -104968.784 | 635.49 | 363.01  | -18.10 |
| <b>VII<sub>SC</sub></b>     | -104969.458 | 639.08 | 365.07  | -17.22 |
| <b>VII<sub>SC</sub>-TS</b>  | -104969.339 | 636.87 | 363.38  | -16.99 |
| <b>VIII<sub>SC</sub></b>    | -104969.641 | 639.60 | 358.77  | -17.11 |
| <b>IV<sub>S</sub></b>       | -90311.476  | 519.51 | 305.840 | -39.36 |
| <b>III<sub>SN</sub>-TS'</b> | -90311.320  | 519.14 | 301.000 | -38.89 |
| <b>III<sub>SC</sub>-TS'</b> | -90311.429  | 519.67 | 300.840 | -40.65 |
| <b>I<sub>S</sub>-TS''</b>   | -96534.972  | 547.98 | 330.981 | -21.84 |
| <b>X<sub>S</sub></b>        | -81881.622  | 431.40 | 271.806 | -38.30 |
| <b>I<sub>S</sub>-TS'''</b>  | -101793.060 | 604.35 | 355.961 | -23.08 |
| <b>XI<sub>S</sub></b>       | -87139.560  | 487.52 | 300.655 | -39.35 |
| <b>I<sub>P</sub>-TS</b>     | -68223.117  | 472.33 | 250.139 | -10.44 |
| <b>I<sub>P</sub>-TS'</b>    | -68222.906  | 472.14 | 248.925 | -10.53 |
| <b>II<sub>P</sub></b>       | -68224.351  | 475.35 | 240.016 | -9.69  |



|                                             |            |        |         |        |
|---------------------------------------------|------------|--------|---------|--------|
| <b>II<sub>P</sub>-TS</b>                    | -92758.844 | 667.76 | 340.917 | -14.81 |
| <b>III<sub>PN</sub></b>                     | -78106.028 | 552.02 | 277.736 | -35.71 |
| <b>III<sub>PN</sub>-TS</b>                  | -78105.818 | 552.30 | 276.824 | -34.66 |
| <b>V<sub>PN</sub></b>                       | -78107.404 | 553.78 | 269.632 | -34.78 |
| <b>VI<sub>PN</sub></b>                      | -92762.715 | 671.17 | 334.016 | -14.56 |
| <b>II<sub>P</sub>-TS'</b>                   | -92758.656 | 667.88 | 346.947 | -18.39 |
| <b>III<sub>PC</sub></b>                     | -78105.512 | 552.25 | 280.069 | -39.04 |
| <b>III<sub>PC</sub>-TS</b>                  | -78105.234 | 552.09 | 279.913 | -37.58 |
| <b>V<sub>PC</sub></b>                       | -78107.441 | 553.93 | 278.67  | -33.99 |
| <b>VI<sub>PC</sub></b>                      | -92762.640 | 670.54 | 338.359 | -15.70 |
| <b>VI<sub>PC</sub>-TS</b>                   | -92762.511 | 668.65 | 337.552 | -11.90 |
| <b>VII<sub>PC</sub></b>                     | -92763.012 | 671.28 | 337.802 | -14.10 |
| <b>VII<sub>PC</sub>-TS</b>                  | -92762.854 | 668.42 | 332.59  | -12.68 |
| <b>VIII<sub>PC</sub></b>                    | -92763.566 | 671.76 | 333.972 | -13.34 |
| <b>IV<sub>P</sub></b>                       | -78105.292 | 551.76 | 280.805 | -37.10 |
| <b>III<sub>PN</sub>-TS'</b>                 | -78105.276 | 551.18 | 274.444 | -35.93 |
| <b>III<sub>PC</sub>-TS'</b>                 | -78105.261 | 551.68 | 278.634 | -36.97 |
| <b>MF of II<sub>S</sub>-TS'<sup>a</sup></b> | -80430.109 | -      | -       | -      |
| <b>SF of II<sub>S</sub>-TS'<sup>b</sup></b> | -24533.816 | -      | -       | -      |
| <b>MF of II<sub>S</sub>-TS<sup>a</sup></b>  | -80430.094 | -      | -       | -      |
| <b>SF of II<sub>S</sub>-TS<sup>b</sup></b>  | -24533.680 | -      | -       | -      |
| <b>MF of II<sub>P</sub>-TS'<sup>a</sup></b> | -68223.761 | -      | -       | -      |
| <b>SF of II<sub>P</sub>-TS'<sup>b</sup></b> | -24533.829 | -      | -       | -      |
| <b>MF of II<sub>P</sub>-TS<sup>a</sup></b>  | -68223.984 | -      | -       | -      |
| <b>SF of II<sub>P</sub>-TS<sup>b</sup></b>  | -24533.684 | -      | -       | -      |

<sup>a</sup>MF represents metal fragment at energy decomposition analysis

<sup>b</sup>SF represents substrate fragment at energy decomposition analysis

**Table S5. Cartesian Coordinates of the Optimized Geometries.**

|                                                         |              |               |               |                   |              |               |              |
|---------------------------------------------------------|--------------|---------------|---------------|-------------------|--------------|---------------|--------------|
| Styrene                                                 |              |               | C             | 1.656921625       | -3.820068836 | -3.711609364  |              |
| C                                                       | 0.199031353  | 0.049974460   | -3.052597284  | O                 | 2.068941832  | -4.137459278  | -4.796539783 |
| C                                                       | -0.929726839 | -0.436844438  | -2.371161938  | O                 | 1.214009523  | -2.511090517  | -3.445270538 |
| C                                                       | 1.337207556  | 0.465258241   | -2.362348795  | C                 | -0.241556674 | -1.108659625  | -7.787586212 |
| H                                                       | 2.196619749  | 0.838231444   | -2.912503958  | C                 | 0.621373713  | -1.186855435  | -6.683901310 |
| C                                                       | -0.879624009 | -0.490713060  | -0.965755343  | C                 | 0.159210145  | -1.826818585  | -5.506949425 |
| C                                                       | 1.369908571  | 0.404559940   | -0.969662964  | C                 | -1.097991228 | -2.419242382  | -5.404116154 |
| H                                                       | -1.736751318 | -0.853960693  | -0.407453090  | C                 | -1.921455622 | -2.346163988  | -6.523568630 |
| H                                                       | 2.253000975  | 0.730012298   | -0.427438527  | C                 | -1.501096487 | -1.691791415  | -7.699287415 |
| C                                                       | 0.254625887  | -0.075089119  | -0.275637835  | C                 | 1.980744123  | -0.755436718  | -6.448281288 |
| H                                                       | 0.270930201  | -0.123049319  | 0.809633076   | C                 | 2.297384024  | -1.137576342  | -5.171078682 |
| H                                                       | 0.181362525  | 0.100314222   | -4.138609409  | N                 | 1.173088312  | -1.702266932  | -4.575857162 |
| C                                                       | -2.103086710 | -0.862714350  | -3.152635336  | H                 | 0.077674158  | -0.612112164  | -8.699584961 |
| H                                                       | -1.997781873 | -0.732833683  | -4.229802608  | H                 | -1.410000801 | -2.911427975  | -4.488669872 |
| C                                                       | -3.248414993 | -1.381706834  | -2.692831516  | H                 | -2.908123016 | -2.798954725  | -6.489233017 |
| H                                                       | -3.437100887 | -1.552695155  | -1.637118101  | H                 | -2.173567533 | -1.648611307  | -8.551027298 |
| H                                                       | -4.045801640 | -1.660042763  | -3.374152422  | H                 | 3.201401949  | -1.022052765  | -4.593216419 |
| 1 <i>H</i> -indol-1-yl trimethylbenzoate                |              |               | C             | 0.835235655       | -7.405745506 | 0.782560647   |              |
| C                                                       | -0.801888168 | -8.081636429  | -3.842875719  | H                 | 0.138675570  | -6.974474430  | 1.510530114  |
| C                                                       | -0.555720270 | -7.985819340  | -5.214999199  | H                 | 0.428745031  | -8.366289139  | 0.454533398  |
| C                                                       | -0.618603468 | -6.944793701  | -3.052886963  | H                 | 1.774511814  | -7.600489616  | 1.312956810  |
| H                                                       | -0.687634587 | -8.865172386  | -5.840485573  | C                 | 0.683770478  | -6.516185284  | -4.170289993 |
| H                                                       | -0.784220994 | -7.011914253  | -1.980700374  | H                 | 1.602462411  | -6.654312134  | -4.746863842 |
| C                                                       | -0.138139188 | -6.794278145  | -5.808949471  | O                 | 0.154175431  | -7.471023083  | -4.118870735 |
| C                                                       | -0.225963175 | -5.718533039  | -3.596892834  | H                 | 0.071408674  | -5.810341835  | -4.739583492 |
| C                                                       | 0.007074779  | -5.647951603  | -4.989100456  | C                 | 2.295829296  | -2.899662733  | -0.884480655 |
| C                                                       | 0.432841301  | -4.389021873  | -5.653863430  | H                 | 1.514274359  | -2.138289690  | -0.954905152 |
| O                                                       | 1.254618168  | -4.256315231  | -6.521327019  | H                 | 2.703687191  | -2.881988049  | 0.129624590  |
| O                                                       | -0.322722912 | -3.302493811  | -5.172417164  | H                 | 3.089216709  | -2.600524187  | -1.575164437 |
| C                                                       | -0.231754556 | -0.152692273  | -8.798052788  | C                 | 2.831391335  | -0.017435167  | -7.439487934 |
| C                                                       | 0.134592131  | -0.696394384  | -7.555431843  | H                 | 2.422895432  | 0.984552741   | -7.627112865 |
| C                                                       | -0.589307666 | -1.819355011  | -7.074403286  | H                 | 2.804188490  | -0.538814545  | -8.404849052 |
| C                                                       | -1.624319553 | -2.427338839  | -7.784778118  | C                 | 4.287414074  | 0.128658995   | -7.018703938 |
| C                                                       | -1.948254228 | -1.874886394  | -9.019197464  | H                 | 4.357808590  | 0.685939908   | -6.067669392 |
| C                                                       | -1.262770891 | -0.746276438  | -9.516497612  | H                 | 4.734581470  | -0.865981460  | -6.846637726 |
| C                                                       | 1.149342299  | -0.392449021  | -6.580141068  | O                 | 4.971688271  | 0.817522526   | -8.047914505 |
| C                                                       | 1.030927062  | -1.303261399  | -5.566598892  | C                 | 6.338100910  | 1.017173648   | -7.758121490 |
| N                                                       | -0.057331849 | -2.115961313  | -5.836276531  | H                 | 6.482374191  | 1.619969964   | -6.845997334 |
| H                                                       | 0.294812292  | 0.711231828   | -9.194070816  | H                 | 6.875235558  | 0.063584879   | -7.624482155 |
| H                                                       | -2.141812325 | -3.293732882  | -7.385998726  | H                 | 6.777287483  | 1.551652431   | -8.604720116 |
| H                                                       | -2.743145704 | -2.319236040  | -9.610752106  | Trimethylbenzoate |              |               |              |
| H                                                       | -1.545222163 | -0.338893294  | -10.482913017 | C                 | -0.813101113 | -8.104188919  | -3.837814808 |
| H                                                       | 1.872094035  | 0.409705698   | -6.626288414  | C                 | -0.602982283 | -7.986446857  | -5.214809895 |
| H                                                       | 1.593953371  | -1.443638563  | -4.656606674  | C                 | -0.614932299 | -6.968132019  | -3.048749924 |
| C                                                       | -0.036502078 | -4.539743423  | -2.665739059  | H                 | -0.745719135 | -8.861642838  | -5.850365639 |
| H                                                       | -0.861458540 | -3.826799870  | -2.754817009  | H                 | -0.768498957 | -7.037028313  | -1.971006989 |
| H                                                       | 0.011652730  | -4.880306721  | -1.627948046  | C                 | -0.203813463 | -6.779388428  | -5.799291611 |
| H                                                       | 0.884164095  | -3.991527319  | -2.883363962  | C                 | -0.233491555 | -5.740730286  | -3.604359865 |
| C                                                       | 0.126200274  | -6.764344215  | -7.297892094  | C                 | -0.018978070 | -5.634036541  | -4.995024681 |
| H                                                       | 1.193256617  | -6.648975849  | -7.503815651  | C                 | 0.420908988  | -4.287554264  | -5.625574589 |
| H                                                       | -0.224228933 | -7.687802315  | -7.766490936  | O                 | 1.467193365  | -4.334072590  | -6.319912910 |
| H                                                       | -0.372789443 | -5.920814991  | -7.785421371  | O                 | -0.319135040 | -3.305649996  | -5.369139671 |
| C                                                       | -1.278827190 | -9.380313873  | -3.238348722  | C                 | -0.055480529 | -4.533597469  | -2.711824417 |
| H                                                       | -2.362327099 | -9.492677689  | -3.368303776  | H                 | -0.655403674 | -3.705527782  | -3.096832991 |
| H                                                       | -0.803370893 | -10.242155075 | -3.717076302  | H                 | -0.321168274 | -4.760569572  | -1.672307134 |
| H                                                       | -1.069544196 | -9.425775528  | -2.165844679  | H                 | 0.983188629  | -4.180176258  | -2.732013226 |
| C3-substituted 1 <i>H</i> -indol-1-yl trimethylbenzoate |              |               | C             | 0.043363705       | -6.707864285 | -7.289153099  |              |
| C                                                       | 1.054493785  | -6.467426777  | -0.379361302  | H                 | 1.044029474  | -6.308560848  | -7.472239017 |
| C                                                       | 0.782510936  | -6.860335350  | -1.690058112  | H                 | -0.081466220 | -7.688117504  | -7.764156818 |
| C                                                       | 1.546123624  | -5.175523758  | -0.163577095  | H                 | -0.649679303 | -6.003588200  | -7.766441822 |
| H                                                       | 0.400846839  | -7.861212730  | -1.875717163  | C                 | -1.272820830 | -9.410702705  | -3.229873896 |
| H                                                       | 1.776860595  | -4.860735416  | 0.851609707   | H                 | -2.364574432 | -9.529813766  | -3.288637161 |
| C                                                       | 0.990037203  | -6.008859158  | -2.779013634  | H                 | -0.831148028 | -10.272727966 | -3.744703054 |
| C                                                       | 1.751646757  | -4.274344444  | -1.208831072  | H                 | -0.999515176 | -9.478807449  | -2.170406103 |
| C                                                       | 1.467543364  | -4.700563431  | -2.528818130  | 3a                |              |               |              |
|                                                         |              |               | H             | 1.024832368       | -2.010401726 | -2.898260832  |              |
|                                                         |              |               | C             | -0.046641670      | -2.069233656 | -3.111347198  |              |

C -0.404076606 -1.227559924 -4.341845512  
C -0.163027063 0.270976543 -4.204216480  
C -0.649517119 1.112359405 -5.216578960  
C 0.557726860 0.835936606 -3.149964809  
C -0.425835937 2.484818697 -5.173542976  
C 0.783806562 2.215632915 -3.103631258  
C 0.295421958 3.041979551 -4.112863064  
H -1.194525123 0.674701810 -6.049143791  
H 0.948675394 0.209334657 -2.355343819  
H -0.807509720 3.120527029 -5.967395782  
H 1.350078583 2.639200449 -2.279044151  
H 0.477959692 4.112202644 -4.079456329  
H -1.473123908 -1.360756219 -4.548866272  
H -0.293165416 -3.116378546 -3.303354740  
H -0.601481915 -1.734217644 -2.229552031  
C 0.740123391 -4.127322197 -8.163410187  
C 0.914671719 -3.075723648 -7.248808861  
C -0.107338227 -2.816638470 -6.290883064  
C -1.270010948 -3.592518330 -6.217678547  
C -1.411682367 -4.627589703 -7.135631561  
C -0.417852193 -4.891509533 -8.100512505  
C 1.954266667 -2.115286827 -7.015055656  
C 1.547639489 -1.331024408 -5.968965054  
N 0.295577496 -1.733248353 -5.529985905  
H 1.505095243 -4.338715076 -8.905725479  
H -2.036471128 -3.399518967 -5.473010540  
H -2.303443909 -5.246919155 -7.105829239  
H -0.561496675 -5.709493160 -8.800699234  
H 2.877242088 -2.008103132 -7.567090511  
H 2.036059618 -0.490813285 -5.498693943

4a

H 0.845597982 -0.517036378 -3.429801464  
C 0.027124684 -1.194643974 -3.167725325  
C -1.175778031 -1.005279541 -4.108928680  
C -1.831622839 0.376684964 -4.024751663  
C -2.951646566 0.635415614 -4.829482079  
C -1.363535881 1.401865602 -3.196164846  
C -3.584886074 1.874277592 -4.807639599  
C -1.995060325 2.650051117 -3.173093319  
C -3.106186152 2.891539574 -3.977318048  
H -3.310942411 -0.145957813 -5.494232178  
H -0.499709398 1.239974618 -2.560293198  
H -4.449170589 2.050717115 -5.442318439  
H -1.610557556 3.433152676 -2.525187969  
H -3.595740318 3.861154318 -3.960359812  
H -1.940955043 -1.734530926 -3.806021929  
H 0.404420704 -2.216934919 -3.255802393  
H -0.247854099 -1.018934488 -2.122603893  
C 0.721058607 0.666500509 -6.286903381  
C 0.051705152 -0.563454270 -6.410642147  
C 0.156161100 -1.282575488 -7.633199692  
C 0.912739992 -0.816475272 -8.712934494  
C 1.570481420 0.398023069 -8.556719780  
C 1.472746849 1.133713484 -7.357332706  
C -0.796046317 -1.334748864 -5.532831669  
C -1.167718649 -2.451689482 -6.236266136  
N -0.599125385 -2.429382324 -7.498758316  
H 0.629341364 1.247373462 -5.374820709  
H 0.982287228 -1.381199121 -9.638576508  
H 2.167320967 0.789474249 -9.375564575  
H 1.992341161 2.084024906 -7.274999142  
H -1.796760678 -3.275917053 -5.929625511  
H -0.712612391 -3.139406681 -8.202519417

I<sub>s</sub>

Cu -7.554090023 -1.529623032 4.081732750  
H -9.075405121 -1.726476669 3.799596310  
P -5.685937405 -1.150449872 2.622682095  
C -4.313284874 -0.201517522 3.404674292  
C -4.850702763 -2.659301519 1.990760326

C -6.117038727 -0.171549439 1.127537608  
C -3.549935102 -0.817351043 4.443989277  
C -4.104572773 1.146458745 3.087012053  
C -2.585426331 -0.024108810 5.037312508  
C -3.685735941 -2.232013226 4.904942989  
C -3.150777340 1.939500213 3.749263287  
H -4.695890903 1.602463841 2.301112413  
C -2.400402069 1.318684340 4.723394871  
O -1.731960058 -0.381909370 6.053758621  
C -2.668081284 -3.118503571 4.603336334  
C -4.756146431 -2.756678820 5.694694519  
H -3.009577990 2.986568689 3.506263971  
O -1.432571530 1.856218338 5.535064220  
C -0.880987942 0.750883758 6.260372162  
C -2.691044807 -4.462886333 4.961228848  
O -1.533082008 -2.853996038 3.875422716  
C -4.759627819 -4.108971119 6.059418678  
P -6.221773624 -1.701328158 6.067253590  
H -0.853111923 0.995092511 7.326639175  
H 0.126355961 0.525343418 5.878700733  
C -3.730559111 -4.994499207 5.692252636  
O -1.580522537 -5.096033096 4.461728096  
C -0.764502883 -4.061736107 3.898574352  
H -5.581730366 -4.493258476 6.652739525  
H -7.070796967 -2.572441578 7.446231842  
C -5.495353222 -0.207864091 6.848650932  
H -3.750152349 -6.041649342 5.972227573  
H 0.127797589 -3.914314270 4.525233269  
H -0.487664372 -4.335089207 2.875464439  
C -6.521914005 -2.719329596 8.730375290  
C -8.332697868 -3.118348837 7.171939373  
C -7.225520611 -3.399442911 9.721406937  
H -5.552870274 -2.291030169 8.962646484  
C -9.031975746 -3.805263758 8.167251587  
H -8.764391899 -2.983983278 6.181489944  
C -8.480820656 -3.946720839 9.440253258  
C -6.097353458 1.025835514 6.566817760  
C -4.363513947 -0.242553890 7.676836014  
C -5.585602283 2.203265905 7.113302708  
H -6.959479809 1.057595968 5.904894829  
C -3.858260393 0.933546782 8.227814674  
H -3.845473051 -1.180861712 7.848574638  
C -4.467006683 2.158877373 7.946734428  
C -5.560020447 -3.867164373 2.062411308  
C -3.536968470 -2.665971279 1.498764157  
C -4.967933178 -5.058927536 1.642283797  
H -6.571414948 -3.866003513 2.462942362  
C -2.950700760 -3.857279778 1.073262095  
H -2.955317974 -1.749384403 1.492745161  
C -3.662464142 -5.057137012 1.146443009  
C -7.366694450 0.464481443 1.118997574  
C -5.262012005 -0.018474847 0.024291791  
C -7.746221542 1.256981969 0.033200037  
H -8.045598030 0.311668307 1.955608249  
C -5.648389816 0.765149653 -1.061432481  
H -4.299579620 -0.519930601 0.008783017  
C -6.888857841 1.410145998 -1.056647062  
H -2.978286505 0.895566046 8.865266800  
H -4.065135002 3.075815439 8.368418694  
H -6.050263882 3.156052589 6.875215054  
H -10.009867668 -4.223988056 7.946043015  
H -9.028866768 -4.473214149 10.216866493  
H -6.794860840 -3.505200624 10.713806152  
H -5.520831585 -5.991234779 1.718232274  
H -3.200112581 -5.986208916 0.825407445  
H -1.930358410 -3.850029469 0.697786033  
H -4.984408855 0.870213807 -1.915501714  
H -7.186800480 2.021918535 -1.903499246  
H -8.719607353 1.739609361 0.033886287

IX<sub>s</sub>

Cu -0.629524112 -0.178741902 -3.383583069  
P -1.935043693 -1.256434917 -1.808645248

C -0.924609840 -2.460940838 -0.853605330  
C 0.122593731 -1.968607545 -0.012535505  
C -1.081790328 -3.838016272 -1.047245741  
C 0.901247382 -2.932314873 0.603989244  
C 0.398222804 -0.534070492 0.313575834  
C -0.251508713 -4.788713455 -0.426054478  
H -1.874632359 -4.194297314 -1.695525289  
C 0.735870183 -4.299290180 0.400054961  
O 1.941706538 -2.718387604 1.473589301  
C 0.090903804 -0.094945066 1.589076757  
C 1.032881737 0.425163537 -0.537423730  
H -0.383811474 -5.853384018 -0.582808554  
O 1.665091038 -4.996575832 1.128039002  
C 2.462004423 -4.011667728 1.801795840  
C 0.324524373 1.203356028 2.031696081  
O -0.480222553 -0.830831468 2.598810911  
C 1.267433643 1.725424290 -0.077737458  
P 1.414687395 -0.026588587 -2.287396908  
H 3.499359369 -4.085210323 1.452889204  
H 2.396126747 -4.167041779 2.886001825  
C 0.914501488 2.144598246 1.217527747  
O -0.091347381 1.335795045 3.331529379  
C -0.688492835 0.080285572 3.684692621  
H 1.739994287 2.443519592 -0.738074303  
H 1.102410793 3.155178785 1.562008381  
H -0.205970183 -0.312959701 4.587309837  
H -1.765960455 0.221914798 3.838427544  
C 2.515772104 1.311250567 -2.887441397  
C 3.916591883 1.256660700 -2.869320869  
C 1.875934720 2.443327665 -3.424611807  
C 4.666304588 2.323107719 -3.368909597  
H 4.426777363 0.382006913 -2.478765965  
C 2.632914305 3.511455297 -3.908500671  
H 0.788717151 2.482379198 -3.466117144  
C 4.028857708 3.454334974 -3.883599520  
C 2.459822655 -1.518298626 -2.096710682  
C 2.189303398 -2.619950056 -2.919395447  
C 3.465004206 -1.618739247 -1.122301340  
C 2.910854816 -3.805082083 -2.771437168  
H 1.390804291 -2.549946785 -3.654316664  
C 4.198853016 -2.796809435 -0.989812672  
H 3.650442123 -0.786665797 -0.449317813  
C 3.918170214 -3.893857718 -1.808566809  
C -2.636144876 -0.151081666 -0.523596048  
C -2.735129356 1.215075612 -0.827475131  
C -3.062447309 -0.617854655 0.728852570  
C -3.256269217 2.100498676 0.118279926  
H -2.387833595 1.580877781 -1.792256117  
C -3.598296642 0.269258797 1.660484314  
H -2.938418388 -1.663686395 0.993503273  
C -3.690511227 1.631328940 1.359116316  
C -3.370593548 -2.200193644 -2.449285746  
C -3.612100840 -2.127515078 -3.829271793  
C -4.242993832 -2.943219662 -1.636538029  
C -4.706396580 -2.794713736 -4.387012005  
H -2.952667952 -1.529280186 -4.456002235  
C -5.332120419 -3.607294321 -2.196710587  
H -4.073288918 -3.000181675 -0.565868378  
C -5.564926147 -3.536132097 -3.574398041  
H -4.887980938 -2.727476597 -5.456028938  
H -6.417156696 -4.052348614 -4.008104324  
H -6.002023697 -4.178526402 -1.559076786  
H -3.938711882 -0.101122111 2.624724627  
H -4.094415665 3.232568106 2.093317986  
H -3.315960169 3.159812927 -0.115688905  
H 2.126487255 4.380759716 -4.318783760  
H 4.617004871 4.281516075 -4.271370411  
H 5.751816750 2.267256498 -3.355366707  
H 4.982965946 -2.862559795 -0.239484176  
H 4.478356838 -4.817691803 -1.690794349  
H 2.680414200 -4.660632133 -3.399892569  
C -2.420994997 4.300973415 -8.226397514  
C -1.236497164 3.556047678 -8.236549377  
C -3.277459860 4.169883251 -7.128461838  
H -0.555277348 3.651977539 -9.081545830

H -4.204417706 4.741911411 -7.104830265  
C -0.903348863 2.685337067 -7.193987846  
C -2.972655773 3.328475475 -6.052601814  
C -3.9158583615 2.572357178 -6.099934101  
C -1.438648582 1.664900541 -4.952762604  
O -1.142853022 0.447501749 -5.223608494  
O -1.425794363 2.138307095 -3.782664776  
C -3.911302567 3.241923332 -4.867746353  
H -3.436076403 3.652735949 -3.972043991  
H -4.840929985 3.787159920 -5.062215328  
H -4.166298389 2.202630758 -4.628898621  
C 0.393188715 1.904670000 -7.242331028  
H 0.198782131 0.829263568 -7.253486633  
H 0.980206966 2.174686670 -8.126228333  
H 1.008212924 2.095993996 -6.354135990  
C -2.744984388 5.248876095 -9.359300613  
H -2.251311779 6.219225407 -9.216220856  
H -2.404572964 4.853530884 -10.322715759  
H -3.821869373 5.437789440 -9.430492401

=====  
**I<sub>P</sub>**  
=====

P 1.084397674 -0.422823101 -1.020244002  
C 0.903518617 1.382680178 -1.475933433  
C 0.152009547 2.224195004 -0.424514323  
P -1.195083141 1.285123467 0.474748373  
C -2.755076408 1.505355954 -0.579134166  
C -1.751107693 2.556334734 1.758041382  
C -3.376634359 2.830240250 -0.106572509  
C -3.240360022 2.835073709 1.423008204  
C 1.848064899 -1.133085966 -2.593450308  
C 2.699117899 -0.542994857 -0.044044580  
C 3.246865273 -1.650850654 -2.159662962  
C 3.799926996 -0.674036205 -1.109874010  
Cu -0.705164671 -1.082077622 0.394903064  
H -1.373489022 -2.360477209 0.978196859  
C -1.497626901 2.152762890 3.194077730  
C -1.070666790 3.112833738 4.120888233  
C -1.690803766 0.834653735 3.633754492  
C -0.834607542 2.769820213 5.453027248  
C -1.454421401 0.489106804 4.964210033  
C -1.024124622 1.453758001 5.878820419  
C -2.469916582 1.280116081 -2.043582439  
C -2.283004045 -0.039895862 -2.490544558  
C -2.282952309 2.323727608 -2.957579613  
C -1.897958994 -0.310134530 -3.801658869  
C -1.903675199 2.055110216 -4.276925087  
C -1.700666904 0.741434872 -4.702146053  
C 2.775864601 0.533503890 1.011905193  
C 3.559968233 1.684562445 0.877910256  
C 1.952428460 0.414156437 2.146059752  
C 3.509949923 2.695725918 1.844106436  
C 1.896124721 1.420847535 3.106758356  
C 2.674514771 2.573081255 2.955029726  
C 0.998570681 -2.158539772 -3.314426661  
C 0.986598611 -2.181521177 -4.715418339  
C 0.225076631 -3.101901293 -2.621472836  
C 0.217094675 -3.114361048 -5.412060738  
C -0.547602057 -4.032608509 -3.316006422  
C -0.555792212 -4.043197155 -4.712687969  
H 0.341613263 1.370701551 -2.415792465  
H 1.885675192 1.823973775 -1.681700230  
H 0.842308164 2.536811590 0.366341233  
H -0.255437255 3.129838467 -0.889315903  
H -3.400392056 0.689481139 -0.229798853  
H -1.182705283 3.470547199 1.546911955  
H -4.418803692 2.923293352 -0.432955801  
H -2.829534769 3.686801672 -0.520569324  
H -3.863105774 2.042587519 1.857432127  
H -3.563516140 3.779789448 1.873565555  
H 2.002519369 -0.277580351 -3.263344526  
H 2.610310793 -1.511699200 0.464493841  
H 3.903984070 -1.752706528 -3.030433416  
H 3.140863895 -2.650599957 -1.719556689

H 3.999497175 0.295560956 -1.584556222  
H 4.743557453 -1.022281885 -0.673708320  
H -0.907638371 4.136609554 3.791220188  
H -1.983583331 0.063037850 2.925825357  
H -0.493536413 3.526638508 6.154603958  
H -1.594901443 -0.540541768 5.281322002  
H -0.832068861 1.180432439 6.912817478  
H -2.412615299 -0.862039685 -1.788289666  
H -2.427873135 3.353947639 -2.646333456  
H -1.737135887 -1.336944580 -4.113173008  
H -1.763279557 2.879930973 -4.970882416  
H -1.395193338 0.534777939 -5.723835945  
H 4.214897633 1.800921559 0.019505715  
H 1.327114820 -0.470171213 2.258576393  
H 4.127002716 3.582267046 1.721781850  
H 1.236565471 1.312028289 3.962051868  
H 2.628798962 3.363544941 3.698646069  
H 1.573962212 -1.449615240 -5.265929222  
H 0.180454031 -3.080256462 -1.535173178  
H 0.213683933 -3.109211683 -6.498891354  
H -1.155547380 -4.740979195 -2.760014057  
H -1.165224314 -4.763821602 -5.251213551

H 4.137647629 -1.398599267 -3.205198765  
H 3.395070553 -2.474162102 -2.023328066  
H 4.085738659 0.479293883 -1.543662786  
H 4.848008156 -0.899485171 -0.745309591  
H -1.162407756 3.043520212 4.236906528  
H -2.780951262 -0.256519467 1.999495149  
H -1.399477243 1.733773947 6.327484608  
H -3.014307737 -1.559119225 4.071066380  
H -2.323148966 -0.575551927 6.254847527  
H -2.428072214 -0.671971500 -2.040413141  
H -2.180189371 3.546251535 -2.858883619  
H -1.605659842 -1.167406440 -4.316714764  
H -1.390303850 3.051527262 -5.145864010  
H -1.074525714 0.695929706 -5.883710384  
H 4.165060520 1.793406725 0.262512386  
H 1.285181403 -0.861042082 2.059306860  
H 3.905108452 3.350648642 2.160336971  
H 1.008394599 0.707971931 3.938572884  
H 2.317010880 2.831570625 4.002256870  
H 1.813312650 -1.278419971 -5.478445530  
H 0.429004163 -2.998680353 -1.782464981  
H 0.543216050 -2.982470751 -6.743820190  
H -0.828601778 -4.694982529 -3.036487103  
H -0.798381567 -4.698606491 -5.531788349  
C -3.218340397 -6.284166336 3.360255957  
C -4.052666664 -5.289047718 2.846106291  
C -1.842480421 -6.165167332 3.145632505  
H -5.126681328 -5.360542297 3.009540319  
H -1.176858068 -6.932431698 3.539117813  
C -3.551828861 -4.205193520 2.115769863  
C -1.291136622 -5.085602283 2.449493647  
C -2.156482697 -4.097205162 1.920885324  
C -1.583508849 -2.926590681 1.169822216  
O -2.173861265 -2.478882790 0.134032518  
O -0.503696203 -2.399050474 1.594703317  
C 0.213095844 -5.019905567 2.290120125  
H 0.668223858 -5.983183384 2.546472311  
H 0.505898178 -4.754221439 1.270241022  
H 0.637134135 -4.245619774 2.936301947  
C -4.523211479 -3.174531698 1.579545856  
H -4.523581505 -3.168037653 0.486826360  
H -5.536874771 -3.375614405 1.940757871  
H -4.245470524 -2.161859989 1.889861822  
C -3.781553507 -7.474459648 4.103483677  
H -4.781398296 -7.266850948 4.498479366  
H -3.863363743 -8.348459244 3.443840265  
H -3.138886929 -7.763797760 4.942288876

IX<sub>p</sub>

P 1.196146250 -0.368236005 -1.207234144  
C 1.020888805 1.471947670 -1.512159467  
C 0.213297531 2.224701405 -0.428126067  
P -1.233716011 1.251548767 0.253543347  
C -2.702396393 1.698065162 -0.833367109  
C -1.836942315 2.307509661 1.695648789  
C -3.153920174 3.073553324 -0.321292758  
C -3.174209118 2.953754187 1.212559819  
C 2.024306297 -0.967081130 -2.792003632  
C 2.757128477 -0.574694932 -0.169197619  
C 3.446985960 -1.429431796 -2.355395555  
C 3.908985376 -0.543627858 -1.185800076  
Cu -0.624318063 -0.959927499 0.027875841  
C -1.978027701 1.501568556 2.971957922  
C -1.584347010 2.040659904 4.202714443  
C -2.507400513 0.201022223 2.947790384  
C -1.714298368 1.300992489 5.380888462  
C -2.631255388 -0.542949975 4.119266033  
C -2.234873772 0.006152481 5.341188908  
C -2.359284878 1.473410726 -2.284390211  
C -2.209968567 0.145177841 -2.725960970  
C -2.065879107 2.512826681 -3.173110247  
C -1.746402621 -0.135620192 -4.008823872  
C -1.614104867 2.232309341 -4.467189312  
C -1.442034006 0.911853552 -4.884376526  
C 2.742158413 0.355291307 1.019274831  
C 3.475633860 1.546384573 1.064862370  
C 1.867958307 0.057443280 2.081475735  
C 3.326515675 2.430497885 2.138413191  
C 1.710764289 0.944077194 3.144452810  
C 2.438635349 2.137982130 3.174361944  
C 1.231602192 -2.020965576 -3.540089846  
C 1.243927956 -2.035486460 -4.941462040  
C 0.484733075 -3.003079653 -2.868630648  
C 0.524063408 -2.994647264 -5.656465530  
C -0.240530521 -3.959146738 -3.580025673  
C -0.227363110 -3.958462000 -4.978137016  
H 0.505745828 1.544000626 -2.476515770  
H 2.008077145 1.934929252 -1.628499866  
H 0.851131439 2.414278269 0.441703379  
H -0.114976995 3.196154594 -0.816283464  
H -3.463825703 0.961456597 -0.541989803  
H -1.090756774 3.095636606 1.850137949  
H -4.134296894 3.356730700 -0.722432613  
H -2.443630695 3.852784157 -0.625964761  
H -4.003015518 2.300569057 1.512023091  
H -3.335468292 3.917926073 1.706684232  
H 2.131418467 -0.085979737 -3.436917543  
H 2.667481661 -1.603367925 0.204883844

IX<sub>s-TS</sub>

P 1.397578835 1.172733665 0.301739514  
C 0.471935689 2.272930622 1.458502293  
C -0.132385567 1.700329661 2.619274378  
C 0.162277177 3.584667206 1.083670020  
C -1.015593171 2.512350082 3.307199955  
C 0.180579305 0.357213169 3.194897175  
C -0.746117592 4.382851601 1.802306771  
H 0.621381700 4.005164146 0.196484610  
C -1.333251715 3.808793783 2.908487320  
O -1.695894837 2.207426548 4.461248875  
C 1.030253291 0.298373193 4.283126831  
C -0.376352251 -0.884389102 2.768978834  
H -0.977011383 5.398218155 1.499321461  
O -2.231170893 4.359065533 3.788307428  
C -2.623623848 3.282558441 4.652600288  
C 1.372313619 -0.888692975 4.923451900  
O 1.685209036 1.349231243 4.876098633  
C -0.047001641 -2.068274736 3.437499762  
P -1.430733562 -0.881954432 1.256938577  
H -3.631844997 2.941945076 4.378405571  
H -2.580545902 3.618489742 5.693127155  
C 0.841334343 -2.096678495 4.527766228  
O 2.257623672 -0.634065211 5.937979698  
C 2.455198288 0.786980629 5.944549561

H -0.481193721 -3.004870653 3.109005451  
H 1.097418308 -3.021705389 5.032211304  
H 2.109248638 1.200204372 6.901264191  
H 3.516889811 1.004733920 5.780614376  
C -1.958635449 -2.629471779 1.088066697  
C -3.252006292 -3.093405724 1.357031703  
C -0.993555427 -3.531844378 0.605631351  
C -3.572882652 -4.437550068 1.150927067  
H -4.011206150 -2.410180330 1.723869681  
C -1.312369227 -4.874567986 0.418209940  
H 0.005267488 -3.171218634 0.375311345  
C -2.606506824 -5.330103874 0.686725259  
C -2.929607868 0.036190946 1.776370406  
C -3.487414598 0.938157201 0.861091137  
C -3.517221212 -0.122746810 3.039988518  
C -4.633650780 1.659425020 -1.197295904  
H -2.996294260 1.078028440 -0.100952454  
C -4.667877674 0.592673779 3.370382071  
H -3.069009781 -0.798733711 3.762635469  
C -5.228088856 1.483361959 2.448702097  
C 2.756995678 0.445303947 1.283992171  
C 3.109806299 -0.882050037 1.005444050  
C 3.441568375 1.147188425 2.287381887  
C 4.133183002 -1.501276612 1.724102020  
H 2.583943605 -1.427119493 0.228239611  
C 4.463909626 0.523781300 3.002911329  
H 3.154206276 2.166685581 2.526958704  
C 4.809801102 -0.802814126 2.726351261  
C 2.218089819 2.308275223 -0.882770360  
C 1.455476999 2.730802774 -1.984941244  
C 3.555616617 2.711355925 -0.781949520  
C 2.015481949 3.560053110 -2.955079079  
H 0.427193135 2.385026932 -2.073937416  
C 4.117835999 3.528654337 -1.764219046  
H 4.164948463 2.375763416 0.050792173  
C 3.350781441 3.957393408 -2.848588467  
H 5.368479729 -2.307240248 -2.222491980  
C 4.291296482 -2.168997288 -2.235341549  
C 3.730770111 -0.950734913 -2.635599375  
C 3.433406353 -3.205094814 -1.853865504  
C 2.352840900 -0.765190363 -2.645365000  
C 2.053138018 -3.021828651 -1.855168104  
C 1.465959191 -1.791327477 -2.237061501  
H 4.375520229 -0.126161516 -2.931026697  
H 3.843357086 -4.166029930 -1.549236894  
H 1.954564810 0.202045530 -2.932504892  
H 1.402139783 -3.840001583 -1.554401040  
C 0.021415366 -1.630783200 -2.179762363  
C -0.710384011 -0.531739295 -2.708038568  
H -0.550386190 -2.497886658 -1.864538074  
H -1.755419493 -0.702746332 -2.943563223  
H -1.153142095 0.741759956 -1.737571239  
Cu -0.306969315 -0.104977310 -0.590081751  
H -0.214710072 0.145911694 -3.397783041  
H -0.555281639 -5.562367916 0.051074296  
H -2.860298872 -6.375017643 0.529519796  
H -4.581623077 -4.785977364 1.356825948  
H -5.125908852 0.460078478 4.347286224  
H -6.123030663 2.042833805 2.709293127  
H -5.058740616 2.361634731 0.485232800  
H 1.415592313 3.881075621 -3.802577257  
H 3.793824911 4.590497017 -3.612702370  
H 5.159496784 3.827804089 -1.682254076  
H 4.397952557 -2.529634237 1.494683504  
H 5.602566242 -1.286966681 3.290271997  
H 4.995157719 1.074866533 3.775147200

=====  
**I<sub>s</sub>-TS'**  
=====

P 1.138113737 1.242212296 0.278895140  
C 0.292609453 2.284821272 1.539123416  
C -0.213182434 1.641373396 2.709702730  
C 0.017411601 3.635630846 1.301634550  
C -0.943959892 2.442769289 3.568244696

C 0.093008690 0.239153579 3.132021189  
C -0.751956820 4.413921833 2.184218407  
H 0.407607615 4.108617783 0.407885969  
C -1.224791646 3.781591892 3.312672138  
O -1.497645378 2.076671839 4.770632267  
C 1.004395604 0.084835790 4.162480831  
C -0.481890827 -0.967986465 2.623283386  
H -0.957870543 5.460894585 1.992172837  
O -1.972612023 4.305897713 4.335838795  
C -2.225869179 3.218494415 5.236203194  
C 1.386132121 -1.149556994 4.675813675  
O 1.678899407 1.086077213 4.818295956  
C -0.098960176 -2.202499866 3.161272287  
P -1.596892118 -0.911095142 1.146124721  
H -3.299319744 2.990127325 5.234981060  
H -1.878420830 3.487156391 6.240660667  
C 0.844690263 -2.321347952 4.196334362  
O 2.313392162 -0.976350367 5.671182632  
C 2.575063467 0.433547884 5.724462509  
H -0.540756226 -3.110930443 2.769399881  
H 1.131556511 -3.286259651 4.598603249  
H 2.395666599 0.800348997 6.741929531  
H 3.609463215 0.622074187 5.410006523  
C -2.438670635 -2.544492006 1.154649854  
C -3.704519272 -2.775197029 1.715038061  
C -1.753675461 -3.614490509 0.555745184  
C -4.257863998 -4.055763721 1.700574160  
H -4.265127659 -1.959072113 2.157349348  
C -2.303171873 -4.897080898 0.560900927  
H -0.793510437 -3.447381496 0.077721119  
C -3.555267334 -5.121876717 1.134568810  
C -2.874576569 0.302921385 1.662837386  
C -3.273072004 1.281302333 0.742904246  
C -3.426862955 0.303549707 2.953069687  
C -4.211838245 2.247000217 1.107350230  
H -2.813363791 1.289580584 -0.243893698  
C -4.380055904 1.257244587 3.306835651  
C -3.091673374 -0.424624979 3.685900450  
C -4.768821716 2.234981060 2.387162209  
C 2.560002089 0.528515518 1.194136500  
C 2.812798262 -0.841443479 1.039498448  
C 3.366334200 1.282557964 2.060639381  
C 3.860531092 -1.447755218 1.734516144  
H 2.161693573 -1.427712917 0.395202994  
C 4.424449444 0.677937925 2.739209175  
H 3.152994871 2.336616278 2.214915037  
C 4.671611786 -0.689337492 2.581099510  
C 1.876973271 2.432680845 -0.907111526  
C 1.013851643 2.967224360 -1.881017923  
C 3.233770132 2.784617662 -0.937029541  
C 1.493179798 3.857407093 -2.840673208  
H -0.031267077 2.665363550 -1.881223083  
C 3.712408543 3.664505005 -1.909366846  
H 3.922594070 2.368847370 -0.209531456  
C 2.845359802 4.207323551 -2.857975245  
H -0.536048830 -6.586758614 -2.318401098  
C -0.298251987 -5.526963234 -2.302277565  
C 0.945245087 -5.079110146 -1.840551257  
C -1.226744652 -4.578687668 -2.743474245  
C 1.252273083 -3.722105503 -1.831561923  
C -0.927514374 -3.219702959 -2.727684736  
C 0.330256760 -2.747421741 -2.282097578  
H 1.684255481 -5.795670509 -1.488626480  
H -2.205358982 -4.901206493 -3.091195583  
H 2.227161646 -3.392354965 -1.476440310  
H -1.682460308 -2.509155750 -3.051349163  
C 0.702538431 -1.340733767 -2.283123016  
C -0.074635267 -0.303356290 -2.864736557  
H -0.894508958 -0.569085181 -3.523655415  
H -1.173524022 0.572749376 -1.938725710  
Cu -0.433096886 -0.224803716 -0.700899899  
H 0.445848912 0.602856338 -3.157740593  
H -1.754598737 -5.704940796 0.088292502  
H -3.987926483 -6.118538857 1.129108429  
H -5.240475178 -4.219036102 2.135524988

H -4.812985897 1.242664099 4.303877354  
H -5.499770641 2.987742901 2.670301199  
H -4.503034115 3.012447834 0.393299580  
H 0.813326836 4.266752720 -3.582915783  
H 3.222541094 4.892299652 -3.612397194  
H 4.767362118 3.925397396 -1.923398256  
H 4.037234306 -2.513620377 1.620806694  
H 5.487617016 -1.160889626 3.121582031  
H 5.054313660 1.273122549 3.395807743  
H 1.731892228 -1.111280680 -2.021430492

=====  
**II<sub>s</sub>**  
=====

Cu 0.341290265 -1.576453090 -1.690577745  
H -0.851242959 -3.127178907 -4.222526073  
H -4.161387920 2.042347193 -2.941020012  
C -3.311563492 1.388395190 -3.116652727  
C -2.020885229 1.910147429 -3.244381428  
C -3.484795332 0.004619900 -3.232421637  
C -0.934053004 1.068008184 -3.471993208  
C -2.398630857 -0.838699162 -3.448162556  
C -1.074173689 -0.340536177 -3.558792830  
H -1.859738588 2.984879494 -3.181581974  
H -4.480059147 -0.425516009 -3.139925957  
H 0.055792965 1.499124646 -3.607125759  
H -2.566436291 -1.909970045 -3.502942085  
C 0.108268052 -1.224130869 -3.678342104  
C -0.050666053 -2.463261604 -4.563923836  
H 0.9733084748 -0.640743375 -4.018959522  
H -0.280049294 -2.207785845 -5.612397194  
P -1.248250604 -2.393435717 -0.136222407  
C -0.370348394 -3.396269560 1.138289690  
C 0.493603021 -2.752352953 2.078005791  
C -0.396664798 -4.794705868 1.058810711  
C 1.243023634 -3.591129541 2.883327246  
C 0.597502470 -1.280173779 2.312419653  
C 0.405269295 -5.616123199 1.870941997  
H -1.057088017 -5.271693707 0.343573183  
C 1.224391699 -4.978199959 2.776110172  
O 2.141781569 -3.215941668 3.852810383  
C 0.020968452 -0.759396970 3.455846786  
C 1.285437822 -0.346099794 1.480720162  
H 0.380230546 -6.697053432 1.790802121  
O 2.116898775 -5.526925087 3.662687540  
C 2.608265638 -4.432497978 4.446873188  
C 0.036000561 0.595452547 3.772161722  
O -0.705319226 -1.445261240 4.400667191  
C 1.311872840 1.012055516 1.820626020  
P 1.971383691 -0.926768661 -0.125307932  
H 3.703245163 -4.441779137 4.436886787  
H 2.220729113 -4.511353970 5.473179340  
C 0.677830398 1.513898253 2.970678091  
O -0.680732727 0.812182307 4.922199249  
C -1.017212272 -0.488749415 5.419592381  
H 1.836696029 1.709127426 1.177356124  
H 0.690997720 2.569783688 3.215987206  
H -0.421711564 -0.703880310 6.319548130  
H -2.089019775 -0.527488410 5.638158798  
C 2.976117373 0.488841653 -0.710542917  
C 4.307188988 0.728162527 -0.343078524  
C 2.331738710 1.380106449 -1.582321048  
C 4.979322910 1.845466495 -0.839769602  
H 4.822543621 0.039381590 0.319250017  
C 2.999956131 2.504473209 -2.064280033  
H 1.307157755 1.181271911 -1.882288337  
C 4.327270985 2.736133337 -1.696218848  
C 3.165018797 -2.233079672 0.341315001  
C 3.284636974 -3.332332611 -0.521504223  
C 3.921392679 -2.199466228 1.521818876  
C 4.148399353 -4.381878853 -0.210282821  
H 2.683121681 -3.362153053 -1.427755833  
C 4.788797855 -3.247628927 1.828157306  
H 3.802074671 -1.373489857 2.216527462  
C 4.901175022 -4.340719700 0.965425789

C -2.208320856 -1.137095571 0.785117209  
C -2.372989178 0.115867980 0.177290514  
C -2.777323484 -1.372591734 2.046279907  
C -3.098043680 1.118588090 0.823332012  
H -1.938549638 0.306800157 -0.799238503  
C -3.494470119 -0.364793450 2.690889597  
H -2.625567198 -2.328089476 2.539618015  
C -3.655213833 0.883799195 2.081882477  
C -2.508113861 -3.530197620 -0.831298649  
C -2.115674019 -4.294476032 -1.941301107  
C -3.821501970 -3.639081478 -0.355906546  
C -3.013363361 -5.166924000 -2.554904938  
H -1.106948614 -4.181266308 -2.329670429  
C -4.722849369 -4.502810955 -0.979363978  
H -4.145774364 -3.039999008 0.489027560  
C -4.321457386 -5.268815041 -2.075664520  
H 0.871738553 -3.055642366 -4.56122749  
H 4.225741386 -5.235016346 -0.878461659  
H 5.568988323 -5.161542892 1.212117195  
H 5.371993065 -3.214273214 2.744972229  
H 6.014357090 2.020412207 -0.558127165  
H 4.854806900 3.605168104 -2.079814434  
H 2.488819599 3.189128876 -2.735756397  
H -2.698105097 -5.748990536 -3.416339636  
H -5.028630257 -5.936654568 -2.559900999  
H -5.742560387 -4.573910713 -0.610057175  
H -3.220806360 2.081737518 0.336529911  
H -4.209819794 1.668652534 2.588906288  
H -3.925602913 -0.552745700 3.671186209

=====  
**II<sub>s</sub>-TS**  
=====

Cu -0.225367934 -0.640409172 -3.275611639  
H -3.287765980 0.239022851 -2.958347082  
C -2.991525173 0.164878532 -4.008861542  
C -1.566022754 0.644347548 -4.274747372  
C -1.284786224 2.067005157 -4.025138855  
C -0.376012027 2.758244276 -4.864307880  
C -1.890365720 2.827951908 -2.996723175  
C -0.073450968 4.101628304 -4.674347878  
C -1.565601230 4.169029713 -2.790973425  
C -0.649511337 4.822366238 -3.620262384  
H 0.091145538 2.208366871 -5.678743839  
H -2.639273643 2.365931273 -2.361276388  
H 0.622136235 4.593084812 -5.351623058  
H -2.049079657 4.715878010 -1.983794212  
H -0.411429375 5.871422768 -3.468255520  
H -1.304944158 0.421686471 -5.309515953  
H -3.097308159 -0.886818111 -4.292779922  
P -1.387740850 -2.107519150 -1.769847393  
C -0.324418843 -3.191905975 -0.719692111  
C 0.580032349 -2.563976526 0.194005519  
C -0.301685214 -4.581977367 -0.879331887  
C 1.438460112 -3.410557032 0.871523261  
C 0.607995868 -1.112561584 0.559981525  
C 0.599410117 -5.410557747 -0.186826944  
H -1.002571106 -5.052361012 -1.557851076  
C 1.469974279 -4.788738251 0.679166913  
O 2.375960588 -3.055171251 1.809542775  
C 0.077728279 -0.757325768 1.787873507  
C 1.195356846 -0.051650207 -0.197503909  
H 0.607145607 -6.485544682 -0.327287942  
O 2.432326555 -5.350288391 1.477882385  
C 3.097407818 -4.252434254 2.120175123  
C 0.062537178 0.547463179 2.272257566  
O -0.522172749 -1.593513489 2.696728945  
C 1.197824478 1.251419783 0.311500728  
P 1.759526610 -0.415499955 -1.919710398  
H 4.120007992 -4.170460224 1.729564786  
H 3.094270706 -4.408373356 3.204602242  
C 0.630388796 1.579331636 1.556981325  
O -0.554216802 0.585649431 3.495597601  
C -1.017053962 -0.751229763 3.743483782  
H 1.649809361 2.047635555 -0.268510073





C 4.068242550 -6.536403656 -0.610064864  
 C -2.730984449 -2.898166895 0.841080844  
 C -2.419900656 -1.556851506 0.588431776  
 C -3.304619074 -3.259502649 2.070870399  
 C -2.680495024 -0.583386421 1.551841259  
 H -1.965435386 -1.279974580 -0.356843114  
 C -3.570942879 -2.282325745 3.027135134  
 H -3.518681049 -4.302292347 2.285681486  
 C -3.257119179 -0.944535792 2.770034313  
 C -3.969679594 -4.884983063 -0.895062864  
 C -4.011149883 -5.874557972 -1.894391894  
 C -5.180161953 -4.419827938 -0.356558532  
 C -5.225339890 -6.416132450 -2.309224367  
 H -3.100000143 -6.194805622 -2.386664391  
 C -6.395527363 -4.953039169 -0.788945079  
 H -5.182838917 -3.640408754 0.396739572  
 C -6.422730923 -5.957376957 -1.756713748  
 H -3.820540428 -3.410029888 -5.139501095  
 C -0.544993937 -5.648005486 -6.661582470  
 C -0.088488705 -4.694295883 -5.741239071  
 C -0.261079699 -4.935260296 -4.351596832  
 C -0.855981946 -6.107459545 -3.873082161  
 C -1.322212696 -7.036766529 -4.806313038  
 C -1.169618368 -6.802717686 -6.185461044  
 C 0.568854094 -3.412297726 -5.830834866  
 C 0.740218997 -2.965425968 -4.535883427  
 N 0.244271189 -3.868708611 -3.614537239  
 H -0.416618228 -5.496808052 -7.729448318  
 H -0.939991474 -6.282469749 -2.802478790  
 H -1.791231036 -7.955520630 -4.465747833  
 H -1.532159209 -7.542798519 -6.892841339  
 H 0.914612532 -2.922778368 -6.732078075  
 H 1.213245988 -2.054876804 -4.190268993  
 H 4.696887970 -0.619356453 -3.040881872  
 H 3.452830315 1.531513572 -3.124489546  
 H 1.200847983 1.693155885 -2.076118946  
 H -2.428585529 0.453555852 1.350377440  
 H -3.455135822 -0.187217921 3.522905111  
 H -4.016476631 -2.564303160 3.976795912  
 H -7.322858334 -4.581732750 -0.362208307  
 H -7.370905876 -6.369750977 -2.088715076  
 H -5.234985828 -7.180368900 -3.080843687  
 H 2.830621719 -7.421040535 -2.141647100  
 H 4.775593758 -7.360579014 -0.588620722  
 H 5.094665051 -5.400120735 0.912603140

=====  
 III<sub>SN-TS</sub>  
 =====

Cu -1.216004848 -3.395395517 -2.088064671  
 H -3.883001566 -4.118024826 -3.352836609  
 C -3.372238159 -3.779512405 -4.254199982  
 C -2.350223780 -2.714123487 -4.006773949  
 C -2.655247927 -1.551225066 -3.157772303  
 C -3.837274790 -1.488326311 -2.378054857  
 C -1.846572876 -0.392656505 -3.256195068  
 C -4.203565121 -0.302539855 -1.751417756  
 C -2.205621958 0.782656550 -2.601492405  
 C -3.390239239 0.834531844 -1.856127024  
 H -4.470039845 -2.364923239 -2.272737265  
 H -0.942931056 -0.423471183 -3.859510422  
 H -5.119151115 -0.265459418 -1.166178107  
 H -1.573665619 1.664147735 -2.691998959  
 H -3.678883076 1.757240772 -1.358463883  
 H -1.810294509 -2.429884672 -4.902696609  
 H -2.932358980 -4.639178753 -4.765150547  
 P -2.509649754 -4.114159584 -0.296270162  
 C -1.503993988 -5.421860695 0.532951713  
 C -0.334988326 -5.053030014 1.275123596  
 C -1.762436628 -6.770828724 0.258631617  
 C 0.490972877 -6.100656509 1.648210168  
 C 0.046552610 -3.694848299 1.777808070  
 C -0.901879251 -7.807677269 0.657290280  
 H -2.668465614 -7.047736645 -0.264539152  
 C 0.237717241 -7.436093330 1.335866928

O 1.646903753 -6.012612820 2.375249624  
 C -0.168745354 -3.402845860 3.111278772  
 C 0.728142262 -2.693024397 1.025403976  
 H -1.123615384 -8.847290039 0.444659948  
 O 1.226627111 -8.228251457 1.839260340  
 C 2.213201523 -7.332781792 2.379769087  
 C 0.227417633 -2.204178095 3.704233408  
 O -0.821861029 -4.179685116 4.030883789  
 C 1.151685953 -1.509109855 1.636817098  
 P 0.883295596 -2.980558872 -0.775971234  
 H 3.104888678 -7.344560623 1.740764976  
 H 2.445978642 -7.625618458 3.407800436  
 C 0.909791648 -1.239333510 2.995986223  
 O -0.171467006 -2.181327105 5.011555195  
 C -0.732741296 -3.475364447 5.279465199  
 H 1.684740424 -0.767430842 1.053084970  
 H 1.237717986 -0.317895710 3.463530302  
 H -0.076465413 -4.027066708 5.965557098  
 H -1.735546112 -3.355500698 5.701056480  
 C 1.831669331 -1.547875166 -1.417889953  
 C 3.137099028 -1.655830503 -1.918633819  
 C 1.178089499 -0.304073870 -1.490867972  
 C 3.774721384 -0.544045568 -2.474881172  
 H 3.658558607 -2.606598377 -1.880865335  
 C 1.822448492 0.806868255 -2.033679247  
 H 0.163046181 -0.204335168 -1.115477920  
 C 3.124272346 0.689528704 -2.532551527  
 C 2.042170048 -4.397178173 -0.871100247  
 C 1.798198104 -5.434995651 -1.780578017  
 C 3.165377617 -4.467213154 -0.030591505  
 C 2.670847416 -6.520698071 -1.861166596  
 H 0.9266600158 -5.398311615 -2.421476126  
 C 4.042520523 -5.547227859 -0.122102186  
 H 3.346876860 -3.682124376 0.697888494  
 C 3.798009396 -6.575019836 -1.038594484  
 C -2.777131796 -2.844657898 0.987351716  
 C -2.416964054 -1.518146157 0.721720934  
 C -3.290170670 -3.183785200 2.250475168  
 C -2.576331615 -0.537294328 1.699529529  
 H -1.989570618 -1.262508869 -0.242401421  
 C -3.458990335 -2.199116230 3.222113848  
 H -3.533528090 -4.217801094 2.477658272  
 C -3.101990938 -0.875721693 2.947289944  
 C -4.163981438 -4.824517250 -0.650314033  
 C -4.273640633 -5.811395168 -1.648207068  
 C -5.339384556 -4.329413891 -0.064857736  
 C -5.517489910 -6.311597824 -2.026084185  
 H -3.382541656 -6.182443142 -2.145806313  
 C -6.585606098 -4.821045399 -0.457328945  
 H -5.288561821 -3.557981253 0.695345938  
 C -6.679814816 -5.813141346 -1.433123589  
 H -4.123981476 -3.349682331 -4.933583736  
 C 0.778198540 -5.818166733 -6.487513065  
 C 0.548945963 -4.725937366 -5.643411636  
 C -0.338563949 -4.870450974 -4.542869091  
 C -0.966935337 -6.086143970 -4.257175922  
 C -0.736913979 -7.158850193 -5.119616032  
 C 0.119476467 -7.021422386 -6.227291584  
 C 1.097597718 -3.391562939 -5.543346405  
 C 0.546949565 -2.818603516 -4.430922508  
 N -0.339940816 -3.696741819 -3.797154427  
 H 1.473028541 -5.738049984 -7.319270134  
 H -1.585015535 -6.186782360 -3.368628263  
 H -1.212710023 -8.116053581 -4.925059319  
 H 0.288507760 -7.875885963 -6.876696587  
 H 1.850802541 -2.952569723 -6.184644222  
 H 0.740016937 -1.849344134 -3.994585037  
 H 4.785603046 -0.645265579 -2.860505342  
 H 3.626179934 1.551684499 -2.961754560  
 H 1.310263157 1.765101194 -2.069432974  
 H -2.280012131 0.486517698 1.490221620  
 H -3.221368790 -0.112753741 3.711277008  
 H -3.860227585 -2.464164019 4.196326256  
 H -7.485166073 -4.424875259 0.005129644  
 H -7.651754379 -6.191425800 -1.735105157

H -5.578285694 -7.078677177 -2.792640924  
H 2.468725681 -7.319112778 -2.569488287  
H 4.482836246 -7.415957451 -1.107432127  
H 4.916465759 -5.588511944 0.523052573

=====

V<sub>SN</sub>

=====

Cu -0.065299295 -3.325263739 -1.537607193  
H -2.735490561 -0.993741155 0.620119035  
C -3.158489943 -1.983013034 0.421131670  
C -3.848958015 -2.032958746 -0.945600569  
C -4.970593452 -1.020645976 -1.147762537  
C -5.470602512 -0.242823407 -0.098009773  
C -5.522490025 -0.864074588 -2.426516294  
C -6.498505592 0.676463664 -0.322545558  
C -6.545572758 0.053292040 -2.652228832  
C -7.036379337 0.829468012 -1.598976135  
H -5.065133572 -0.338934749 0.903270185  
H -5.132612228 -1.453043699 -3.252659559  
H -6.872524738 1.274976969 0.503478169  
H -6.957443714 0.167642102 -3.650830746  
H -7.830639839 1.549130440 -1.774192810  
H -4.265810013 -3.039696217 -1.072156787  
H -2.348992586 -2.712091923 0.434923708  
P -0.636594653 -4.900348186 0.111830652  
C 0.652252495 -6.172454357 -0.205465317  
C 2.013421297 -5.820338726 0.068092607  
C 0.350661427 -7.359437466 -0.880056024  
C 2.966767311 -6.705734253 -0.399906605  
C 2.469733715 -4.702731609 0.952256083  
C 1.347878575 -8.239445686 -1.338610530  
H -0.683677495 -7.629453182 -1.054311872  
C 2.654287815 -7.870972633 -1.102771401  
O 4.322094440 -6.618470669 -0.235616237  
C 2.781432390 -5.017788410 2.262669325  
C 2.671357393 -3.342472315 0.572438240  
H 1.102054000 -9.164276123 -1.847712517  
O 3.800059319 -8.539353371 -1.423359871  
C 4.882768154 -7.687202454 -1.015189171  
C 3.242974520 -4.082386017 3.188820362  
O 2.647137403 -6.238020897 2.868087292  
C 3.161973476 -2.417478561 1.501621127  
P 2.167635202 -2.809676886 -1.112873077  
H 5.372058868 -7.265775681 -1.903423309  
H 5.583746433 -8.258335114 -0.399550200  
C 3.461205721 -2.769445658 2.830315590  
O 3.410013914 -4.675673008 4.405518055  
C 3.100244522 -6.067116261 4.220195770  
H 3.315947771 -1.388538361 1.198637247  
H 3.833789825 -2.042108059 3.542398930  
H 4.002999306 -6.668495178 4.383727074  
H 2.299206972 -6.353354931 4.909303188  
C 2.525507927 -1.018860340 -1.135922432  
C 3.746680737 -0.475309014 -1.559800506  
C 1.519116402 -0.164488301 -0.658383548  
C 3.959218979 0.903198361 -1.489565611  
H 4.530459404 -1.124952078 -1.938566208  
C 1.742842793 1.208350897 -0.570515990  
H 0.550716996 -0.572576106 -0.374681711  
C 2.964368820 1.745583177 -0.985923469  
C 3.348653793 -3.639946461 -2.228026628  
C 2.884108543 -4.085906506 -3.474042177  
C 4.681155205 -3.878715515 -1.860611081  
C 3.740886211 -4.754951000 -4.347151279  
H 1.844311237 -3.918038845 -3.747218847  
C 5.538440228 -4.540965080 -2.739398479  
H 5.037796974 -3.568594456 -0.882973135  
C 5.070068359 -4.980320454 -3.980643988  
C -0.473787010 -4.445782661 1.875890374  
C -0.300020903 -3.098707676 2.222056866  
C -0.470008433 -5.421207905 2.885983467  
C -0.131731406 -2.728763580 3.556577921  
H -0.259953231 -2.344893694 1.440786004  
C -0.311625093 -5.047003746 4.220219612

H -0.576404393 -6.470510483 2.626420975  
C -0.137880579 -3.701640844 4.558539391  
C -2.282974720 -5.691019058 -0.047863439  
C -2.687093973 -6.145449162 -1.317692637  
C -3.208525419 -5.729474068 1.005638242  
C -3.970545769 -6.649789810 -1.520656109  
H -1.991614699 -6.104777336 -2.152695656  
C -4.499310493 -6.220728874 0.795037329  
H -2.931834459 -5.370175362 1.990427375  
C -4.883120537 -6.684842587 -0.462746233  
H -3.853584528 -2.237447739 1.224888802  
C -0.146508098 -0.208323747 -3.701390743  
C -1.030627728 -1.172664881 -3.194480419  
C -2.072250843 -0.778693259 -2.312918663  
C -2.221919775 0.550050139 -1.893609405  
C -1.329229116 1.483443975 -2.409295321  
C -0.308809400 1.112474680 -3.309000015  
C -1.152215719 -2.606313944 -3.380848408  
C -2.284661531 -2.992270470 -2.656717062  
N -2.834180117 -1.913048625 -2.014901876  
H 0.651059449 -0.496566951 -4.380198479  
H -3.023169041 0.845086217 -1.225918531  
H -1.427880883 2.525407791 -2.117685556  
H 0.368659347 1.872079730 -3.686836243  
H -0.677158833 -3.196141243 -4.156123638  
H -2.769544601 -3.954881907 -2.599778891  
H 4.906715870 1.317952991 -1.822742820  
H 3.137288094 2.816459179 -0.927633405  
H 0.954539478 1.858738899 -0.203736693  
H 0.020958340 -1.684247971 3.811514616  
H -0.000328141 -3.415004730 5.596860886  
H -0.318666399 -5.806743622 4.996953964  
H -5.204781532 -6.240139484 1.620950341  
H -5.887010098 -7.067620277 -0.620851815  
H -4.261126041 -7.007430553 -2.504340649  
H 3.373176575 -5.104007721 -5.307774544  
H 5.738957882 -5.500545979 -4.660473824  
H 6.571400166 -4.718646526 -2.452956676

=====

VI<sub>SN</sub>

=====

Cu 0.514613450 -3.694612265 -1.204445362  
H -3.468926430 -2.748766899 -2.346891642  
C -3.110935926 -3.770434141 -2.211446762  
C -2.631195307 -4.356493950 -3.543224335  
C -3.672697783 -4.364928246 -4.659927368  
C -5.030729771 -4.135473728 -4.413408756  
C -3.264476061 -4.607232571 -5.979648590  
C -5.956084251 -4.133370876 -5.461108208  
C -4.184276104 -4.604547977 -7.025489807  
C -5.537259102 -4.365693569 -6.770034790  
H -5.375771999 -3.928609133 -3.405994654  
H -2.208793402 -4.760947227 -6.186236382  
H -7.004377842 -3.936214685 -5.250644684  
H -3.843095541 -4.774388790 -8.043507576  
H -6.254590988 -4.348729134 -7.586486816  
H -2.333055735 -5.396001816 -3.361178875  
H -2.278944969 -3.731281281 -1.506418943  
P 0.123572357 -5.570338726 0.005012481  
C 1.746282339 -6.309712410 0.454502463  
C 2.690382957 -5.450645924 1.103989482  
C 2.136686087 -7.575755596 0.007185197  
C 3.978646040 -5.943446159 1.202782989  
C 2.403360844 -4.150219917 1.793307781  
C 3.459541321 -8.045776367 0.124174997  
H 1.403960824 -8.223125458 -0.460151881  
C 4.365604401 -7.190555096 0.711324692  
O 5.051221371 -5.331169128 1.798244119  
C 2.102918625 -4.180763721 3.141870022  
C 2.584743023 -2.851228476 1.220557451  
H 3.751554966 -9.027882576 -0.229485825  
O 5.695961952 -7.395310402 0.960279822  
C 6.182458401 -6.168006897 1.527756929  
C 1.997827530 -3.032089472 3.929629803

O 1.899466872 -5.290945053 3.923651218  
 C 2.518230438 -1.714674950 2.028291941  
 P 2.604459524 -2.745873213 -0.617219388  
 H 6.836753845 -5.665799618 0.803328872  
 H 6.707122803 -6.382774353 2.464508057  
 C 2.235680103 -1.781499028 3.406233549  
 O 1.705729723 -3.382237196 5.221843719  
 C 1.419364929 -4.788402081 5.177845478  
 H 2.644832134 -0.737164795 1.579177260  
 H 2.175946712 -0.888514221 4.018009186  
 H 1.944193959 -5.290634155 5.994825363  
 H 0.333192587 -4.942656994 5.235569477  
 C 2.765735626 -0.968096375 -1.044066072  
 C 3.836446285 -0.144687176 -0.650903285  
 C 1.739656687 -0.424349338 -1.828027010  
 C 3.857000351 1.199379921 -1.016493559  
 H 4.651986599 -0.545017779 -0.057710674  
 C 1.761352539 0.924474895 -2.189855099  
 H 0.901692748 -1.031407833 -2.148268223  
 C 2.816739082 1.738036871 -1.782388926  
 C 4.236305237 -3.440124512 -1.088390231  
 C 4.308930874 -4.230022907 -2.244938612  
 C 5.414469719 -3.145233393 -0.385018528  
 C 5.542235374 -4.683820248 -2.717113972  
 H 3.389181614 -4.495714188 -2.762832403  
 C 6.647723198 -3.587136507 -0.863602519  
 H 5.362246513 -2.586071253 0.545119524  
 C 6.714488983 -4.351509571 -2.034025669  
 C -0.791342914 -5.319225788 1.566907525  
 C -1.424172282 -4.082139492 1.768480182  
 C -0.874902666 -6.319260597 2.547311306  
 C -2.138488531 -3.854518890 2.946543694  
 H -1.343998790 -3.298379183 1.014627099  
 C -1.603459835 -6.088441849 3.713676453  
 H -0.367031634 -7.268721104 2.399851084  
 C -2.234188080 -4.854944706 3.915187836  
 C -0.848820746 -6.801128864 -0.947764218  
 C -0.331599951 -7.316051960 -2.152581930  
 C -2.202204466 -7.024525642 -0.652590156  
 C -1.144774437 -8.026926994 -3.034381151  
 H 0.709772229 -7.142694473 -2.411810637  
 C -3.017371178 -7.724408627 -1.545428395  
 H -2.628345490 -6.626877785 0.263172895  
 C -2.498162031 -8.221662521 -2.742119789  
 H -3.911119699 -4.380266190 -1.781017780  
 C 0.502990127 -0.838571727 -5.087854385  
 C 0.096311331 -2.082742453 -4.577650070  
 C -1.286769271 -2.410666466 -4.537327290  
 C -2.263186455 -1.520439506 -5.005099297  
 C -1.831407905 -0.301650137 -5.507714272  
 C -0.463190079 0.041697562 -5.548930645  
 C 0.808510482 -3.189991951 -4.013472080  
 C -0.134730026 -4.135626793 -3.658902884  
 N -1.403087139 -3.679980993 -3.987834215  
 H 1.556172490 -0.570479035 -5.101967335  
 H -3.317386866 -1.765491843 -4.966824532  
 H -2.567842007 0.410287619 -5.871481419  
 H -0.168362290 1.010430694 -5.944407940  
 H 1.880405545 -3.280181646 -3.916835070  
 H -0.010690260 -5.161050320 -3.340519190  
 H 4.684622288 1.830236793 -0.701790273  
 H 2.836131334 2.789846659 -2.057102203  
 H 0.939372599 1.314852715 -2.782064199  
 H -2.615286827 -2.889701843 3.099340200  
 H -2.797214270 -4.677214146 4.828200817  
 H -1.677428603 -6.867672443 4.468081951  
 H -4.067879200 -7.868132114 -1.307357311  
 H -3.139568090 -8.748963356 -3.441958666  
 H -0.725798249 -8.406262398 -3.962567329  
 H 5.588205338 -5.292819977 -3.616894722  
 H 7.677234173 -4.692078590 -2.407092571  
 H 7.558144093 -3.334137201 -0.324198216  
 C -3.519299746 1.707165599 1.535956264  
 C -2.294865608 1.166016459 1.930392742  
 C -4.047222137 1.282021761 0.314728260

H -1.842601418 1.500662208 2.863147020  
 H -4.991219997 1.704340696 -0.026657762  
 C -1.611200452 0.226908803 1.148696899  
 C -3.390445948 0.357775718 -0.507307351  
 C -2.159780264 -0.198399842 -0.081332192  
 C -1.351632476 -1.108778477 -1.009191036  
 O -1.234295368 -0.757492721 -2.192317009  
 O -0.815437198 -2.165899038 -0.489177406  
 C -4.027158737 0.007221133 -1.835516453  
 H -4.381435871 -1.030492544 -1.844558239  
 H -4.893355846 0.648365974 -2.029376507  
 H -3.307179451 0.106344774 -2.649550915  
 C -0.257019311 -0.249644548 1.611553431  
 H 0.503807247 -0.054150712 0.849163592  
 H 0.044548661 0.261074424 2.531944036  
 H -0.239989907 -1.325301170 1.788004041  
 C -4.243972301 2.715313911 2.398243427  
 H -4.888620377 2.221435308 3.137119293  
 H -3.540928602 3.345530272 2.954180717  
 H -4.882447243 3.372196198 1.797875285

=====  
**II<sub>s</sub>-TS'**  
 =====

Cu -2.243358135 0.947758377 -4.128157616  
 H -5.454327583 0.836856008 -4.336148739  
 C -5.045289993 1.490248680 -5.111362934  
 C -3.784198284 2.209934950 -4.666051865  
 C -3.859062433 3.000041962 -3.427607059  
 C -2.977535725 4.099092007 -3.235530615  
 C -4.794065475 2.746393681 -2.392783880  
 C -3.016028166 4.877756119 -2.084095001  
 C -4.840610504 3.541522264 -1.248423696  
 C -3.951872110 4.607666016 -1.076124787  
 H -2.300059319 4.356111526 -4.043592930  
 H -5.487143517 1.914962530 -2.487394571  
 H -2.343202829 5.728693485 -1.994670630  
 H -5.573534966 3.319497585 -0.475164562  
 H -3.998761892 5.227835178 -0.184075251  
 H -3.336556196 2.792867184 -5.469541073  
 H -4.851037979 0.875150383 -5.992285728  
 P -2.782873154 -0.570287228 -2.227044106  
 H -1.654040694 -2.031051159 -2.148486614  
 C -0.318026364 -1.859830737 -1.667411447  
 C -2.051546097 -3.265728235 -2.677314281  
 C 0.502237380 -2.971558809 -1.751019120  
 C 0.252250046 -0.635700226 -1.029461980  
 C -1.185464621 -4.370670795 -2.760110855  
 H -3.069360018 -3.388992786 -3.029481173  
 C 0.097130552 -4.187343597 -2.292132854  
 O 1.812674761 -3.058447361 -1.351022720  
 C 0.552049637 -0.690110624 0.319696695  
 C 0.603762388 0.576713920 -1.696685076  
 H -1.510082960 -5.320704937 -3.169774771  
 O 1.135089040 -5.082629204 -2.258366346  
 C 2.268985748 -4.349366665 -1.770588279  
 C 1.127203584 0.364861220 1.021330953  
 O 0.327263147 -1.742487907 1.171103001  
 C 1.194663167 1.625169158 -0.981516540  
 P 0.190870956 0.760078013 -3.486068249  
 H 2.999655962 -4.228572369 -2.581605673  
 H 2.705003262 -4.878037930 -0.915750206  
 C 1.469063044 1.542191505 0.394462973  
 O 1.283226609 0.019846981 2.337973595  
 C 0.704004526 -1.286120415 2.475387573  
 H 1.462130427 2.538751125 -1.497899294  
 H 1.926723599 2.362432718 0.935936034  
 H 1.445773363 -1.971517682 2.901853323  
 H -0.189147562 -1.221427321 3.110421658  
 C 1.106587648 2.270674467 -3.977610111  
 C 2.310628653 2.298912525 -4.694329262  
 C 0.470832020 3.483188868 -3.656116486  
 C 2.873863935 3.522890806 -5.065998077  
 H 2.801388264 1.375570536 -4.984907627  
 C 1.036899805 4.702370644 -4.020861149

H -0.482767165 3.469367504 -3.135311127  
C 2.243356466 4.722556591 -4.728609085  
C 1.078019381 -0.677102864 -4.214342594  
C 0.343868971 -1.580483794 -4.996605873  
C 2.424783468 -0.954936743 -3.935705185  
C 0.947505951 -2.725151062 -5.515532017  
H -0.718988955 -1.413850784 -5.147446632  
C 3.033581495 -2.090976000 -4.469074249  
H 2.985631704 -0.298453659 -3.276361227  
C 2.297602654 -2.975224257 -5.262917519  
C -2.680911779 0.095495664 -0.522487581  
C -2.450248003 1.466993213 -0.357248843  
C -2.752274990 -0.733175695 0.610301495  
C -2.307203054 2.006384373 0.921858072  
H -2.377654791 2.111729145 -1.226287484  
C -2.625942945 -0.188346997 1.887146831  
H -2.879586458 -1.805582762 0.490736097  
C -2.399159908 1.182839036 2.044569731  
C -4.454613686 -1.304661274 -2.391539097  
C -4.858294487 -1.634589076 -3.697752953  
C -5.348620892 -1.514126182 -1.330871701  
C -6.111127853 -2.199553490 -3.933740139  
H -4.193823814 -1.417939782 -4.532884598  
C -6.609202385 -2.064150333 -1.571462512  
H -5.071114063 -1.236624241 -0.318920225  
C -6.989025116 -2.417244673 -2.868315935  
H -5.839618206 2.206186533 -5.383438587  
C -2.217523336 8.621003151 -3.697443724  
C -1.126302242 8.314389229 -4.526375771  
C -3.436906338 7.976104736 -3.934424639  
H -0.177193716 8.829212189 -4.371520519  
H -4.295362473 8.209068298 -3.304334641  
C -1.226342559 7.366901398 -5.549651623  
C -3.583261013 7.024502754 -4.953903675  
C -2.464925051 6.722043991 -5.751651764  
C -2.565639019 5.646946907 -6.821142197  
O -3.133205891 5.792104244 -7.893986225  
O -1.948027968 4.583721638 -6.355744362  
C -3.155797720 0.111674754 -7.833762169  
C -2.294358969 1.150107741 -7.496131420  
C -2.550225973 2.465711594 -7.954411983  
C -3.696002722 2.785571098 -8.669532776  
C -4.577460289 1.736664176 -8.975018501  
C -4.302162170 0.420083970 -8.583624840  
C -1.047228336 1.236366391 -6.738349438  
C -0.592783630 2.530791044 -6.880033493  
N -1.445275307 3.296747446 -7.642566681  
H -2.944446564 -0.913148701 -7.533792019  
H -3.885377407 3.818273544 -8.944736481  
H -5.485466003 1.949829340 -9.533448219  
H -4.994555950 -0.374232322 -8.854042053  
H -0.467120409 0.390915543 -6.400495529  
H 0.316787124 2.969095230 -6.498388767  
H -6.409533024 -2.447680473 -4.949334621  
H -7.971660614 -2.845297813 -3.050464869  
H -7.295876980 -2.215430260 -0.741546154  
H -2.696537971 -0.834286273 2.759374857  
H -2.286353588 1.604002714 3.040416002  
H -2.128936052 3.072028160 1.030732870  
H 0.517313361 5.628833294 -3.789197445  
H 2.678361893 5.670346260 -5.034311771  
H 3.804248571 3.535905600 -5.629527569  
H 4.080362797 -2.292109966 -4.256031036  
H 2.770999193 -3.864790916 -5.669872761  
H 0.361432582 -3.424837112 -6.104445457  
C -2.062387466 9.602464676 -2.555048704  
H -1.605086684 9.122124672 -1.678984404  
H -1.415305495 10.443428040 -2.832482100  
H -3.029469967 10.007470131 -2.236737251  
C -0.045673881 7.053543091 -6.442589760  
H 0.833448231 7.647607803 -6.164748192  
H 0.211166039 5.991415501 -6.387116909  
H -0.283987403 7.267558575 -7.492959023  
C -4.902655125 6.325357914 -5.194417000  
H -4.793979645 5.240412235 -5.076537132

H -5.668220997 6.667191029 -4.490073681  
H -5.253054619 6.504903316 -6.216828823

III<sub>sc</sub>

Cu -1.274702072 1.303786039 -3.165694475  
H -4.717835426 1.962405920 -2.943298101  
C -4.110347271 2.541728020 -3.635876656  
C -2.761164665 2.908166885 -3.108015537  
C -2.536068439 3.245383501 -1.712148309  
C -1.337360859 3.922984600 -1.367830753  
C -3.471281290 2.982682705 -0.683302224  
C -1.083953738 4.310992718 -0.057230014  
C -3.221122265 3.393517971 0.620065629  
C -2.026638985 4.049067497 0.944411516  
H -0.626187623 4.148631573 -2.157160044  
H -4.394977093 2.463634491 -0.914791763  
H -0.163863599 4.836311817 0.183370635  
H -3.954162598 3.194217682 1.395828724  
H -1.838460445 4.363402367 1.966652036  
H -2.193191051 3.534777164 -3.786427498  
H -4.026097298 1.996239066 -4.577320576  
P -2.368277550 -0.475143075 -1.952397108  
C -1.623944879 -2.093449831 -2.432034969  
C -0.318760991 -2.432021379 -1.952099562  
C -2.266954184 -2.933199406 -3.350732803  
C 0.236584440 -3.587653875 -2.472049236  
C 0.477515042 -1.691891074 -0.926805198  
C -1.670532465 -4.099504948 -3.861841440  
H -3.269062281 -2.696257353 -3.684209824  
C -0.398329169 -4.391520977 -3.419188738  
O 1.473510385 -4.097086906 -2.191869736  
C 0.609211028 -2.232690334 0.337930799  
C 1.207941175 -0.489998341 -1.169811010  
H -2.184336901 -4.734197140 -4.574569225  
O 0.413708180 -5.425265789 -3.772952795  
C 1.630149364 -5.257544994 -3.023804903  
C 1.377404451 -1.644652247 1.345790029  
O 0.025798295 -3.374852419 0.809566915  
C 1.999250531 0.076536663 -0.163704172  
P 0.924089253 0.332096308 -2.776839256  
H 2.461674690 -5.092942715 -3.718266964  
H 1.796470761 -6.139411449 -2.395899534  
C 2.100852489 -0.491976708 1.119921207  
O 1.291486144 -2.386549234 2.485433817  
C 0.399406523 -3.475920200 2.192594528  
H 2.564600229 0.977449059 -0.369590342  
H 2.718073130 -0.048875209 1.892697334  
H 0.915185273 -4.426632881 2.363501310  
H -0.497117758 -3.385707617 2.816802740  
C 2.110381842 1.712580323 -2.910117865  
C 3.074666262 1.792942762 -3.923408270  
C 1.945977569 2.800550699 -2.033264399  
C 3.864300728 2.938489437 -4.050526619  
H 3.203084469 0.975862443 -4.625106335  
C 2.747164249 3.933202982 -2.153369665  
H 1.181112528 2.763977528 -1.262705564  
C 3.706465006 4.006566525 -3.168035507  
C 1.386465669 -0.905399442 -4.043811798  
C 0.453403831 -1.266735554 -5.027285099  
C 2.632194042 -1.550254941 -4.011215687  
C 0.763789713 -2.240180254 -5.974787235  
H -0.532360673 -0.813597500 -5.024097919  
C 2.943708658 -2.519623518 -4.965782642  
H 3.351531267 -1.302432179 -3.235963821  
C 2.011872530 -2.866973400 -5.948879242  
C -2.222966671 -0.445788115 -0.132292166  
C -1.538802266 0.607185423 0.486115456  
C -2.707811117 -1.507592201 0.649058998  
C -1.345451117 0.606505752 1.866918802  
H -1.141439557 1.417305708 -0.114085920  
C -2.529265642 -1.495324373 2.032063246  
H -3.209625483 -2.346395969 0.175397873  
C -1.841754794 -0.441715509 2.643974781

C -4.143495083 -0.594615161 -2.361052513  
C -4.496603012 -0.604592860 -3.722569942  
C -5.158011436 -0.567223310 -1.393772125  
C -5.834013939 -0.630841136 -4.107617855  
H -3.724613428 -0.547985911 -4.485325813  
C -6.498738289 -0.572041571 -1.785225749  
H -4.909750938 -0.535810411 -0.338433087  
C -6.839644909 -0.613469720 -3.137676239  
H -4.646324635 3.474388838 -3.870486259  
C -2.524482250 1.093943357 -6.567823410  
C -1.708738804 2.058247805 -5.969294071  
C -1.974293590 3.440023184 -6.160249233  
C -3.062950373 3.866786242 -6.916890144  
C -3.880893469 2.893083811 -7.500349522  
C -3.611963034 1.525221229 -7.335918903  
C -0.547813416 2.007033825 -5.085061550  
C -0.174085572 3.414242029 -4.940608978  
N -1.013317347 4.244711399 -5.511558533  
H -2.320076942 0.031908695 -6.449400425  
H -3.253031015 4.926546574 -7.056062698  
H -4.732511520 3.199640989 -8.100795746  
H -4.254608631 0.793439925 -7.817474842  
H 0.226869822 1.262291193 -5.22444057  
H 0.690900683 3.772232056 -4.391574860  
H -6.090692520 -0.635913908 -5.162880898  
H -7.884006977 -0.618866622 -3.435529947  
H -7.277397633 -0.545563459 -1.028338313  
H -2.919697046 -2.313324213 2.631178379  
H -1.691380382 -0.441115707 3.719638824  
H -0.804532588 1.425171852 2.331353903  
H 2.614438295 4.765086174 -1.467284083  
H 4.320896626 4.895729542 -3.273343563  
H 4.601381779 2.994184494 -4.846199036  
H 3.914930820 -3.005874395 -4.940640926  
H 2.254964113 -3.625267506 -6.687223434  
H 0.027554164 -2.517877579 -6.723091602

---

---

### III<sub>sc</sub>-TS

---

---

Cu -1.353717804 1.168999672 -3.019933462  
H -4.426602840 1.715111136 -3.255159378  
C -4.040067673 2.531322002 -3.860211372  
C -2.680062771 3.004946947 -3.436697483  
C -2.443067312 3.305996180 -2.009422779  
C -1.342450023 4.117346287 -1.645765901  
C -3.356004477 2.924369812 -0.996609747  
C -1.164832592 4.534142017 -0.329690605  
C -3.187173843 3.367197752 0.311655849  
C -2.091708422 4.168612480 0.653120577  
H -0.639125943 4.427056313 -2.413259029  
H -4.210509300 2.300318241 -1.238213539  
H -0.316606194 5.164722443 -0.074448220  
H -3.907154083 3.077370644 1.072560430  
H -1.963766217 4.508024693 1.677685261  
H -2.291263342 3.784674644 -4.078156471  
H -4.050849438 2.230613947 -4.909228802  
P -2.492333651 -0.512660623 -1.772308111  
C -1.766078472 -2.124092579 -2.305805683  
C -0.426490873 -2.451987267 -1.916502237  
C -2.448494196 -2.936911345 -3.219722986  
C 0.109720401 -3.581054211 -2.512143850  
C 0.432377577 -1.764528632 -0.897891402  
C -1.869603753 -4.075720310 -3.808181524  
H -3.471786022 -2.701878786 -3.484398365  
C -0.572241724 -4.363182068 -3.444198847  
O 1.362671256 -4.092762470 -2.312935352  
C 0.604989886 -2.365598202 0.334736854  
C 1.207970023 -0.586661577 -1.120965958  
H -2.415158749 -4.694906712 -4.510794640  
O 0.227431849 -5.383826733 -3.867305994  
C 1.516853452 -5.147218704 -3.275755882  
C 1.453902721 -1.860153794 1.321237445  
O -0.020842489 -3.490471601 0.796121240  
C 2.081502914 -0.106112495 -0.140143752

P 0.892005503 0.324905634 -2.669502735  
H 2.220114946 -4.824383259 -4.054346085  
H 1.858291864 -6.055529594 -2.771540642  
C 2.223567486 -0.736542106 1.109342456  
O 1.379893422 -2.639752865 2.438764095  
C 0.496984482 -3.726429939 2.115141153  
H 2.675279856 0.778349042 -0.339366972  
H 2.900187254 -0.360308021 1.867605090  
H 1.056538820 -4.669810772 2.125866175  
H -0.331285238 -3.745036364 2.831108570  
C 2.033252001 1.749770641 -2.724343777  
C 2.960350513 1.957151771 -3.754826546  
C 1.833440900 2.765558720 -1.770232081  
C 3.685011864 3.150265217 -3.817896128  
H 3.111602306 1.201404929 -4.518027306  
C 2.567739248 3.946706295 -1.830142379  
H 1.090626836 2.636575699 -0.987893820  
C 3.494505644 4.143958569 -2.858727694  
C 1.387558699 -0.817813396 -4.012141228  
C 0.429996669 -1.230641246 -4.952263355  
C 2.688759327 -1.339117765 -4.085720539  
C 0.773788214 -2.118612289 -5.970145226  
H -0.598560333 -0.891925216 -4.864502430  
C 3.033128738 -2.224465847 -5.107174873  
H 3.428876162 -1.053600192 -3.343142986  
C 2.078801632 -2.608071566 -6.054417610  
C -2.196331978 -0.463543147 0.029485106  
C -1.506915927 0.623761356 0.581234157  
C -2.579554319 -1.530482888 0.859115362  
C -1.211276174 0.652381837 1.943430543  
H -1.187101364 1.436711073 -0.061573692  
C -2.296213865 -1.492070436 2.223012686  
H -3.075519562 -2.397747993 0.432767302  
C -1.609038115 -0.403005004 2.767035007  
C -4.304669857 -0.665592790 -1.997935057  
C -4.800653458 -0.647446632 -3.315468073  
C -5.217230320 -0.706514299 -0.932588458  
C -6.170532703 -0.709417462 -3.562201738  
H -4.109858036 -0.562712789 -4.152013302  
C -6.590415955 -0.751650572 -1.183170080  
H -4.864553928 -0.695947051 0.092935823  
C -7.069329739 -0.760559380 -2.493542433  
H -4.728689194 3.384251356 -3.763282061  
C -2.702512503 1.283363938 -6.707688332  
C -1.792854905 2.156584501 -6.116035461  
C -1.547713518 3.433011055 -6.672794819  
C -2.229423046 3.867145061 -7.803911209  
C -3.160140753 2.992999077 -8.382074356  
C -3.385399103 1.715448260 -7.852317333  
C -0.948240638 2.078207254 -4.918974876  
C -0.172343016 3.346059084 -4.987074375  
N -0.544066131 4.132616520 -5.951731682  
H -2.882834435 0.293686420 -6.292083740  
H -2.031670570 4.848092079 -8.224044800  
H -3.709851980 3.306800842 -9.264913559  
H -4.104013920 1.056448460 -8.332082748  
H -0.328866571 1.177700758 -4.893414497  
H 0.591751873 3.637718916 -4.272226334  
H -6.536298752 -0.701012909 -4.585197449  
H -8.138195038 -0.797568381 -2.682911873  
H -7.285645485 -0.780936778 -0.348794341  
H -2.602968693 -2.316903114 2.860301256  
H -1.376908302 -0.381827474 3.827983856  
H -0.666151285 1.495066285 2.358400822  
H 2.410558701 4.718760967 -1.082113504  
H 4.058350563 5.070201397 -2.914119244  
H 4.395361900 3.302119970 -4.625160694  
H 4.045579910 -2.614044189 -5.165100098  
H 2.349742651 -3.295586586 -6.850570202  
H 0.022028506 -2.435021639 -6.686970711

---

---

### V<sub>sc</sub>

---

---

Cu -1.352560997 1.080864549 -2.843912125

H -2.438981771 5.987091541 -7.580699444  
 C -2.971875429 5.030909061 -7.607537270  
 C -2.309637070 3.991930246 -6.694238186  
 C -0.897910237 3.611794233 -7.121682644  
 C -0.557686687 2.262228489 -7.289445877  
 C 0.116308041 4.573162556 -7.235452652  
 C 0.759099662 1.877317190 -7.550236702  
 C 1.434246182 4.192661762 -7.494608402  
 C 1.762287378 2.843371630 -7.646686077  
 H -1.332021713 1.502511382 -7.200105667  
 H -0.118500195 5.626601219 -7.104682446  
 H 0.999709785 0.823901296 -7.660997391  
 H 2.207809925 4.951883316 -7.569866180  
 H 2.789368153 2.549243689 -7.840569496  
 H -2.919165373 3.079883575 -6.712249756  
 H -4.009208679 5.210566521 -7.310920715  
 P -2.390276670 -0.693137109 -1.782233357  
 C -1.528805256 -2.211515427 -2.350175381  
 C -0.141301483 -2.360942125 -2.037723303  
 C -2.175380468 -3.130513668 -3.183692455  
 C 0.478896260 -3.466121674 -2.590386152  
 C 0.654544413 -1.478750229 -1.125011563  
 C -1.506103992 -4.232647419 -3.748672485  
 H -3.228158712 -2.996556759 -3.406833887  
 C -0.171392888 -4.368803501 -3.433641911  
 O 1.786348820 -3.839122057 -2.435372353  
 C 0.883140683 -1.901988745 0.171689332  
 C 1.299976826 -0.256582320 -1.499832153  
 H -2.012661219 -4.941754818 -4.392999172  
 O 0.702653706 -5.335796356 -3.839539051  
 C 1.965165257 -5.022463799 -3.230024576  
 C 1.654207110 -1.184412122 1.088643909  
 O 0.411191821 -3.043309927 0.760637045  
 C 2.086288691 0.443635166 -0.578852057  
 P 0.859972060 0.489615321 -3.120827436  
 H 2.705157757 -4.822768688 -4.013408184  
 H 2.277181864 -5.852086067 -2.585096598  
 C 2.280021667 -0.006763267 0.741249084  
 O 1.682645679 -1.841344714 2.285173178  
 C 0.849639893 -3.001353025 2.128804684  
 H 2.565448284 1.368044853 -0.881542623  
 H 2.893410683 0.539643943 1.448218465  
 H 1.431033134 -3.902697563 2.352639675  
 H -0.024851806 -2.911181688 2.784749031  
 C 1.966755867 1.923480988 -3.366281271  
 C 3.071475744 1.929607153 -4.228446007  
 C 1.612407804 3.109451294 -2.696074486  
 C 3.813322544 3.099335194 -4.406438351  
 H 3.345892906 1.031631827 -4.773056507  
 C 2.365343332 4.270195007 -2.862968206  
 H 0.736696422 3.118113995 -2.048697233  
 C 3.467354298 4.266568184 -3.723504066  
 C 1.276795864 -0.741075814 -4.398634911  
 C 0.323207498 -1.002475142 -5.392598152  
 C 2.491647720 -1.443404913 -4.405568123  
 C 0.578832984 -1.949235439 -6.384652138  
 H -0.625888586 -0.471895635 -5.372347832  
 C 2.753375292 -2.374247313 -5.411867142  
 H 3.220280647 -1.274222732 -3.617906809  
 C 1.797642231 -2.632677078 -6.399114609  
 C -2.366733789 -0.769229770 0.042249877  
 C -2.182530880 0.420710474 0.761035740  
 C -2.532155752 -1.977058768 0.738150418  
 C -2.173793077 0.406744093 2.156909943  
 H -2.036019802 1.354342341 0.221616939  
 C -2.538913250 -1.984809995 2.133660078  
 H -2.638327360 -2.908482790 0.189709470  
 C -2.356306076 -0.795583963 2.845599174  
 C -4.136545658 -0.898819268 -2.290196180  
 C -4.478334904 -0.433682173 -3.572249174  
 C -5.134020805 -1.453126073 -1.473886609  
 C -5.787090302 -0.537804425 -4.039432526  
 H -3.714094162 0.029413568 -4.195307255  
 C -6.447587013 -1.545219183 -1.939645290  
 H -4.892802238 -1.801503778 -0.474059522

C -6.774819374 -1.093022108 -3.220445156  
 H -2.973109961 4.676265717 -8.642770767  
 C -4.873236179 4.899250984 -4.605994225  
 C -3.625472784 4.300242424 -4.474092960  
 C -3.447567701 3.281056404 -3.521055222  
 C -4.472338200 2.822428703 -2.704500675  
 C -5.726664543 3.424670696 -2.853812695  
 C -5.921268940 4.450102329 -3.786928415  
 C -2.301229715 4.474202633 -5.188455105  
 C -1.437430382 3.531479597 -4.389202118  
 N -2.094008207 2.829020500 -3.520584345  
 H -5.041855335 5.705968857 -5.313407421  
 H -4.297074318 2.024416685 -1.989911675  
 H -6.556689739 3.094897985 -2.235088825  
 H -6.901491642 4.910801888 -3.876574516  
 H -1.910658598 5.499782562 -5.157636642  
 H -0.378242910 3.369293928 -4.551500797  
 H -6.040420532 -0.170667857 -5.030603409  
 H -7.799169540 -1.165411115 -3.576340675  
 H -7.216198921 -1.970586419 -1.299121737  
 H -2.682096243 -2.921636343 2.665686131  
 H -2.354569912 -0.806023896 3.932003021  
 H -2.022644758 1.331236839 2.706376553  
 H 2.087135077 5.176998615 -2.332116604  
 H 4.049525738 5.172896862 -3.864773273  
 H 4.664285183 3.096931458 -5.082635880  
 H 3.703282595 -2.902166605 -5.423026085  
 H 1.999907494 -3.367929697 -7.172377110  
 H -0.172222644 -2.157326937 -7.141160965

=====  
 VI<sub>sc</sub>  
 =====

Cu -1.225280046 0.909941137 -3.188374996  
 H -1.382622004 4.692094803 -9.075039864  
 C -2.028090954 3.814960003 -9.194811821  
 C -1.709871054 2.739605665 -8.147155762  
 C -0.298772424 2.178671122 -8.258227348  
 C -0.101237170 0.791609108 -8.293207169  
 C 0.826136172 3.008967638 -8.160720825  
 C 1.180186510 0.243947700 -8.205489159  
 C 2.107939482 2.467108965 -8.066496849  
 C 2.289008856 1.082366943 -8.080473900  
 H -0.965322375 0.132675156 -8.356287956  
 H 0.699435234 4.087377071 -8.111547470  
 H 1.308288813 -0.835393310 -8.202478409  
 H 2.964479208 3.124661922 -7.949531555  
 H 3.284866571 0.661467493 -7.977591515  
 H -2.406692743 1.904851079 -8.288467407  
 H -3.066649675 4.148796558 -9.110011101  
 P -2.229854822 -0.861506522 -2.039065123  
 C -1.264738202 -2.435802698 -2.046604156  
 C 0.070134453 -2.384844303 -1.543687701  
 C -1.773543239 -3.627659559 -2.576680422  
 C 0.780526519 -3.571043015 -1.594977736  
 C 0.702317655 -1.184432864 -0.908508301  
 C -1.012130141 -4.809967041 -2.643254280  
 H -2.789072752 -3.650535822 -2.954743624  
 C 0.270422906 -4.746335983 -2.142292023  
 O 2.073583603 -3.779283762 -1.179480433  
 C 0.737145066 -1.131363869 0.473289818  
 C 1.324928045 -0.089154020 -1.589245081  
 H -1.412437201 -5.725269318 -3.064613819  
 O 1.219682097 -5.734157085 -2.095083237  
 C 2.355846643 -5.159866333 -1.433117270  
 C 1.313833714 -0.083407134 1.188746929  
 O 0.235309005 -2.064399958 1.348042727  
 C 1.916750073 0.946836352 -0.857402742  
 P 0.989104509 0.179678306 -3.380527020  
 H 3.233034134 -5.238843441 -2.086030722  
 H 2.526547194 -5.680634975 -0.480815202  
 C 1.930090189 0.970425129 0.549498260  
 O 1.184594393 -0.317355484 2.535269022  
 C 0.307416141 -1.448893905 2.640892029  
 H 2.355559349 1.783826709 -1.389882326

H 2.384319782 1.784508109 1.102718949  
H 0.721340835 -2.163038254 3.359388590  
H -0.695714295 -1.111478567 2.935849428  
C 2.261328220 1.369888425 -3.975021124  
C 3.516879082 1.002226472 -4.484938622  
C 1.903822660 2.728617668 -3.954537153  
C 4.398488522 1.974983335 -4.957071304  
H 3.805373430 -0.042266525 -4.532272339  
C 2.794962406 3.697374582 -4.421461105  
H 0.925626218 3.042024612 -3.592980385  
C 4.042527199 3.326482058 -4.925551414  
C 1.392896891 -1.398525238 -4.219532490  
C 0.518523157 -1.815788388 -5.232957363  
C 2.498387098 -2.201560259 -3.897576809  
C 0.744424045 -3.011056900 -5.917911530  
H -0.346634209 -1.199727416 -5.468507290  
C 2.727805614 -3.391851187 -4.588203907  
H 3.152014494 -1.916751146 -3.077697992  
C 1.851034641 -3.799685001 -5.597342491  
C -2.616189241 -0.600974619 -0.264763951  
C -2.490188837 0.700673938 0.245765030  
C -3.012765646 -1.645646453 0.586441517  
C -2.791067839 0.956914485 1.586209297  
H -2.117016792 1.496861219 -0.396085173  
C -3.314626455 -1.382610559 1.923195124  
H -3.078362942 -2.661185503 0.203634933  
C -3.209313869 -0.078865796 2.425199986  
C -3.823655128 -1.305430412 -2.839433432  
C -3.803506374 -1.459631205 -4.238956928  
C -5.053186893 -1.378303885 -2.169232368  
C -4.978353500 -1.705290198 -4.945002556  
H -2.858704567 -1.364729047 -4.771349430  
C -6.234209061 -1.605568171 -2.883431673  
H -5.092614651 -1.250988960 -1.091118336  
C -6.202551842 -1.774087310 -4.268756866  
H -1.878301144 3.423138380 -10.205945969  
C -4.568438053 3.784231901 -6.587111950  
C -3.382563829 3.178367138 -6.193309307  
C -3.391060591 2.268116951 -5.120627403  
C -4.546674728 1.937911868 -4.427141666  
C -5.737547398 2.548586369 -4.836662769  
C -5.748802185 3.458746672 -5.898988724  
C -1.951451063 3.265325546 -6.683623791  
C -1.275771260 2.367087841 -5.676513672  
N -2.080266476 1.788712978 -4.852537632  
H -4.590448380 4.508663654 -7.396461964  
H -4.511596203 1.238738179 -3.598446608  
H -6.662692547 2.317963362 -4.314938068  
H -6.684083462 3.929236174 -6.191443443  
H -1.536645532 4.279073715 -6.593161583  
H -0.209113389 2.190800190 -5.633701801  
H -4.943933010 -1.820539713 -6.025761127  
H -7.122760296 -1.947724104 -4.819725037  
H -7.181471825 -1.651523471 -2.350170135  
H -3.628815413 -2.194518805 2.575159550  
H -3.449021339 0.122466177 3.466513634  
H -2.692001104 1.970976353 1.965100765  
H 2.497101545 4.742229939 -4.395497799  
H 4.733402252 4.080493927 -5.293968201  
H 5.366090775 1.675269246 -5.352540970  
H 3.586668968 -4.008517742 -4.333570480  
H 2.024230242 -4.735166073 -6.123257637  
H 0.051234957 -3.331325531 -6.692051888  
C -0.925609648 5.972761154 0.933617115  
C -2.265986204 6.055634975 1.328152776  
C -3.222121954 5.377796650 0.562330365  
C -2.661013842 6.830101967 2.565645695  
H -0.166579545 6.497187138 1.513693810  
C -0.533189416 5.230731010 -0.184852064  
H -4.272182941 5.440545082 0.846108794  
C -2.866476774 4.619803905 -0.560068607  
C -1.511445761 4.549206734 -0.928675592  
C 0.920212328 5.133606434 -0.591593027  
C -3.918183565 3.891966820 -1.371192455  
C -1.086372256 3.691000223 -2.104377747

O -0.725837886 4.223445415 -3.171600103  
O -1.113611221 2.432755232 -1.843387365  
H -3.773012877 2.806645632 -1.323811769  
H -4.927529335 4.120268345 -1.013001323  
H -3.861093044 4.164917469 -2.432579041  
H 1.050608277 5.448937893 -1.631871700  
H 1.561064005 5.746113300 0.049969645  
H 1.269066572 4.094367981 -0.532187402  
H -2.578261852 6.209873199 3.468557119  
H -2.016173840 7.703336239 2.715372086  
H -3.696728468 7.181435108 2.507549524

=====  
**VI<sub>sc</sub>-TS**  
=====

Cu -1.334688425 0.411165118 -3.616971970  
H -0.620450556 5.615609646 -6.174464226  
C -1.316222310 5.476768017 -7.005830288  
C -1.404090524 3.993868828 -7.417032719  
C -0.097928092 3.490478039 -8.009995461  
C -0.079144768 2.842061758 -9.250885963  
C 1.104341269 3.589485884 -7.297274590  
C 1.101316333 2.299559355 -9.762077332  
C 2.285732508 3.042695999 -7.798959732  
C 2.289261103 2.392677307 -9.035105705  
H -1.004335284 2.751058578 -9.816151619  
H 1.106315136 4.076463223 -6.327677250  
H 1.088659763 1.795870304 -10.725389481  
H 3.196590185 3.108561993 -7.211246967  
H 3.206579208 1.960729122 -9.425515175  
H -2.169532537 3.910052299 -8.200412750  
H -2.288069963 5.848374844 -6.668920517  
P -2.360745668 -1.075970292 -2.110917807  
C -1.358732939 -2.603391886 -1.857976794  
C -0.052615575 -2.470518351 -1.301162958  
C -1.824357510 -3.857960224 -2.267894268  
C 0.672175109 -3.641359806 -1.178879023  
C 0.552169621 -1.209109664 -0.773212492  
C -1.046626091 -5.024058342 -2.161063671  
H -2.819956064 -3.946060658 -2.685026884  
C 0.208090052 -4.879212379 -1.612700582  
O 1.953470111 -3.772715330 -0.697956204  
C 0.625708580 -1.063898683 0.600975096  
C 1.145525455 -0.160931274 -1.543196321  
H -1.413886070 -5.988540173 -2.493358612  
O 1.175999403 -5.832621098 -1.423371792  
C 2.234618187 -5.176622868 -0.714039624  
C 1.191931486 0.042243943 1.228432775  
O 0.170902729 -1.947464347 1.548249602  
C 1.724483609 0.938699663 -0.897680879  
P 0.908041298 -0.101044007 -3.373294353  
H 3.182304382 -5.351592064 -1.234188199  
H 2.275436401 -5.554828644 0.317988157  
C 1.758158326 1.066192746 0.501698375  
O 1.108184695 -0.099999450 2.589572668  
C 0.322805494 -1.281508565 2.807935953  
H 2.166024208 1.730456471 -1.491531253  
H 2.205255508 1.927424073 0.985256553  
H 0.846655667 -1.942338705 3.506748438  
H -0.667745531 -0.995894790 3.186382055  
C 2.219699621 1.056844711 -3.931972504  
C 3.552487850 0.683995724 -4.161126137  
C 1.854618192 2.405741692 -4.045781136  
C 4.507395267 1.650609016 -4.470906258  
H 3.846854448 -0.358420938 -4.102574825  
C 2.820935249 3.374795437 -4.320898056  
H 0.819985986 2.702321768 -3.912633181  
C 4.147691250 2.999870777 -4.533802509  
C 1.399034858 -1.745482326 -4.002068520  
C 0.609689653 -2.285395622 -5.027171612  
C 2.486931086 -2.482409000 -3.510560274  
C 0.908104956 -3.538990021 -5.561481476  
H -0.250118941 -1.722608566 -5.384690762  
C 2.784307241 -3.733922958 -4.048330784  
H 3.066056967 -2.102193356 -2.674320936

C 1.996925235 -4.263262272 -5.074228287  
C -2.629215479 -0.457588047 -0.408588558  
C -2.492910862 0.921027303 -0.187211767  
C -2.913615704 -1.310413361 0.669361949  
C -2.662258625 1.443988919 1.096523762  
H -2.235836506 1.576274037 -1.015306473  
C -3.092154980 -0.782235742 1.947824001  
H -2.979836702 -2.383187294 0.510112882  
C -2.967488527 0.595124781 2.162286282  
C -3.976688623 -1.729905963 -2.682865858  
C -4.070587635 -2.060388803 -4.046248913  
C -5.104824543 -1.886460423 -1.867298365  
C -5.258408070 -2.564553261 -4.573481560  
H -3.217779636 -1.882934570 -4.696821213  
C -6.299574375 -2.373740911 -2.403224468  
H -5.059174538 -1.618889451 -0.816573560  
C -6.379488945 -2.720511198 -3.753043890  
H -0.986577034 6.092670441 -7.848874569  
C -4.316128731 3.938710928 -5.762754440  
C -3.261204958 3.022463799 -5.799892426  
C -3.431679726 1.729396105 -5.251455307  
C -4.632793427 1.346302867 -4.652667522  
C -5.680926323 2.263747692 -4.637351513  
C -5.526967049 3.545506239 -5.190685749  
C -1.854710698 3.097471952 -6.249733925  
C -1.396767378 1.737485170 -6.053894997  
N -2.255825520 0.965100586 -5.399801731  
H -4.204105854 4.938675880 -6.171068192  
H -4.743226528 0.361752242 -4.217489243  
H -6.628149986 1.985898614 -4.182607174  
H -6.358976841 4.244557858 -5.163588524  
H -1.302264690 3.566768646 -5.123258114  
H -0.398704201 1.379305363 -6.277918339  
H -5.316835403 -2.810317039 -5.630118370  
H -7.311217308 -3.097356796 -4.165754318  
H -7.170292377 -2.480376720 -1.761241198  
H -3.322151899 -1.444918156 2.778838634  
H -3.101518631 1.001353741 3.162036419  
H -2.552326918 2.514335632 1.252406120  
H 2.528620481 4.419316769 -4.377893925  
H 4.898401260 3.753307343 -4.757564545  
H 5.536356926 1.352025628 -4.653302670  
H 3.624758005 -4.303409576 -3.659527302  
H 2.224496126 -5.244083881 -5.482822418  
H 0.284814239 -3.953275204 -6.349080086  
C -0.656501412 5.838197231 0.093298554  
C -1.916034937 5.927922249 0.698660672  
C -2.993462801 5.297307491 0.074824698  
C -2.085381508 6.678675652 1.999488950  
H 0.194455191 6.330452919 0.561473310  
C -0.461083323 5.135773659 -1.096172929  
H -3.985080719 5.375606537 0.517366290  
C -2.841034651 4.566421986 -1.111854553  
C -1.560870409 4.483091831 -1.688623190  
C 0.914266288 5.054631233 -1.716480970  
C -4.047891617 3.886956930 -1.723127127  
C -1.376844764 3.634932280 -2.921493769  
O -0.947031617 4.209366798 -3.984790325  
O -1.669628859 2.419701815 -2.824243784  
H -4.187970161 2.885327578 -1.301673412  
H -4.956138134 4.460077286 -1.508447766  
H -3.970060110 3.769348621 -2.804517746  
H 0.899112284 5.433941841 -2.742083073  
H 1.644960761 5.626801968 -1.137579560  
H 1.263768792 4.017257690 -1.769106150  
H -1.601665139 6.146466732 2.828458786  
H -1.627509356 7.673318863 1.948967457  
H -3.140710592 6.806455135 2.258279324

VII<sub>Sc</sub>

Cu -1.200962186 1.074407220 -3.072218657  
H -1.655954361 4.209404469 -8.560672760  
C -2.564104557 3.675522566 -8.860870361

C -2.592101574 2.258863926 -8.255377769  
C -1.490264654 1.330994725 -8.763828278  
C -1.567948580 -0.036573388 -8.444839478  
C -0.392207742 1.770774126 -9.510969162  
C -0.588969767 -0.934905469 -8.863169670  
C 0.597973168 0.873619139 -9.930402756  
C 0.504215419 -0.480980307 -9.612658501  
H -2.407187223 -0.391066164 -7.850419998  
H -0.297689855 2.820535421 -9.773065567  
H -0.676862359 -1.988840222 -8.606679916  
H 1.443548322 1.239496112 -10.509200096  
H 1.269530296 -1.178802848 -9.945659637  
H -3.545644522 1.800676346 -8.563188553  
H -3.418074131 4.251327038 -8.490045547  
P -2.316359758 -0.874405384 -2.641897202  
C -1.161733747 -2.268156767 -2.995078802  
C 0.040199369 -2.375858545 -2.231582642  
C -1.357721090 -3.087704659 -4.114048004  
C 0.943702281 -3.332396984 -2.661299944  
C 0.369531214 -1.621534109 -0.979130089  
C -0.407438785 -4.037411213 -4.535673141  
H -2.270411491 -2.985336542 -4.689743519  
C 0.743979394 -4.133292675 -3.784630775  
O 2.151840925 -3.641792774 -2.085468531  
C 0.174304008 -2.267143726 0.228460968  
C 0.996321559 -0.336059332 -0.906314194  
H -0.572735369 -4.662987232 -5.405740738  
O 1.812996626 -4.973350525 -3.957470655  
C 2.758932829 -4.621816158 -2.936374664  
C 0.545282781 -1.729488373 1.459595203  
O -0.378502458 -3.510725498 0.419464678  
C 1.393766046 0.173990294 0.335411251  
P 1.016921282 0.723016322 -2.425296783  
H 3.652860165 -4.191071033 -3.404903412  
H 3.007252932 -5.512576580 -2.347289801  
C 1.178974390 -0.510338664 1.546686292  
O 0.230760053 -2.606154442 2.465862989  
C -0.504366100 -3.667152882 1.838159561  
H 1.885855556 1.137286544 0.382489234  
H 1.495995164 -0.098684832 2.498321295  
H -0.079451598 -4.631143570 2.136939287  
H -1.563502312 -3.589030266 2.118557453  
C 2.121417999 2.137835979 -2.009291649  
C 3.356652021 2.359348536 -2.638173819  
C 1.671635985 3.077887774 -1.061988354  
C 4.126418591 3.479184628 -2.313713312  
H 3.723085880 1.663351655 -3.385763645  
C 2.450412035 4.186531544 -0.730472028  
H 0.704621673 2.946502686 -0.589448035  
C 3.682286978 4.393298626 -1.356450319  
C 1.937737226 -0.235736161 -3.686418295  
C 1.395080566 -0.303907990 -4.978492737  
C 3.151410103 -0.887227416 -3.417392254  
C 2.054822683 -1.003397703 -5.990538597  
H 0.443395108 0.178957865 -5.187796116  
C 3.815690517 -1.576300144 -4.432366848  
H 3.568313360 -0.858063221 -2.414576530  
C 3.268453598 -1.638362408 -5.718767166  
C -2.893388271 -1.084892154 -0.919932663  
C -2.966029406 0.076722242 -0.134045914  
C -3.257044315 -2.319100380 -0.361745805  
C -3.409363747 0.004570324 1.187388539  
H -2.653707266 1.030315399 -0.553208530  
C -3.713337183 -2.383423090 0.956189871  
H -3.167894840 -3.227139950 -0.951440275  
C -3.788351059 -1.223377943 1.734449506  
C -3.752558231 -1.184819341 -3.734254837  
C -3.659698248 -0.669670284 -5.037927628  
C -4.920034409 -1.854789853 -3.345260382  
C -4.707492828 -0.839630604 -5.940204620  
H -2.777828217 -0.111434020 -5.338475227  
C -5.969806671 -2.016030788 -4.251378536  
H -5.021525860 -2.234951496 -2.333556414  
C -5.866003513 -1.514137268 -5.550601482  
H -2.610514402 3.651323557 -9.955759048



C -5.136267662 2.659328461 -6.159495831  
 C -3.761656046 2.501713991 -5.911305904  
 C -3.293604851 2.469490290 -4.567452431  
 C -4.173467159 2.584627628 -3.483088255  
 C -5.530107021 2.732333183 -3.751295805  
 C -6.006155491 2.770658016 -5.080121994  
 C -2.603290319 2.310252905 -6.743920326  
 C -1.531797171 2.205212831 -5.879626274  
 N -1.910298109 2.300069809 -4.544140339  
 H -5.515231133 2.688381910 -7.179293156  
 H -3.788885355 2.544328928 -2.468201160  
 H -6.234954357 2.820269108 -2.928404331  
 H -7.071866512 2.890458822 -5.259671688  
 H -1.422945976 3.551186800 -3.718811274  
 H -0.488906890 2.062810183 -6.135835648  
 H -4.630188942 -0.408373415 -6.933666706  
 H -6.690951824 -1.630616188 -6.247975826  
 H -6.875365734 -2.528280973 -3.936563253  
 H -4.011482716 -3.340727568 1.376893163  
 H -4.137162685 -1.278996229 2.762175798  
 H -3.453978300 0.909397304 1.787889361  
 H 2.072358847 4.903807163 -0.007063450  
 H 4.2837750534 5.263751507 -1.108648419  
 H 5.078775883 3.634168625 -2.814842224  
 H 4.765903473 -2.061400890 -4.221149921  
 H 3.787525415 -2.181379080 -6.503935814  
 H 1.617242455 -1.042388320 -6.984254837  
 C -0.006965951 7.363766670 -0.403097153  
 C -0.642645121 7.404943943 0.839758515  
 C -1.504701257 6.357465744 1.171148896  
 C -0.377900392 8.537307739 1.803647041  
 H 0.667920053 8.172132492 -0.678019464  
 C -0.211405367 6.323949337 -1.314898968  
 H -2.019227743 6.378337383 2.129654408  
 C -1.728220224 5.278117657 0.310714036  
 C -1.079582453 5.262063980 -0.948706269  
 C 0.535318911 6.386620045 -2.630608559  
 C -2.674392700 4.186520576 0.765521646  
 C -1.306135774 4.103317261 -1.868310571  
 O -1.242976069 4.396737099 -3.144906044  
 O -1.521895289 2.953323841 -1.449043751  
 H -2.129987717 3.266896486 0.999141634  
 H -3.223277092 4.507530689 1.656251431  
 H -3.395605803 3.922130823 -0.012023987  
 H -0.145885810 6.589968204 -3.460381031  
 H 1.292237401 7.176334858 -2.595773697  
 H 1.033797860 5.442029476 -2.858114481  
 H 0.505866468 8.328272820 2.420470953  
 H -0.187878832 9.476801872 1.274335265  
 H -1.221199870 8.693260193 2.483534336

=====  
**VII<sub>sc</sub>-TS**  
 =====

Cu -1.428796291 1.257205129 -3.037506104  
 H -0.195497438 3.401874781 -8.477038383  
 C -1.187323332 3.312035561 -8.937683105  
 C -1.979426146 2.143658161 -8.319055557  
 C -1.344409704 0.765042663 -8.535676956  
 C -2.014011383 -0.363705486 -8.026816368  
 C -0.131376639 0.562845469 -9.204564095  
 C -1.489568353 -1.645858169 -8.169813156  
 C 0.398769826 -0.726666927 -9.357171059  
 C -0.273341238 -1.834638476 -8.838885307  
 H -2.956094742 -0.223065376 -7.502687931  
 H 0.417048812 1.408245444 -9.611836433  
 H -2.029975414 -2.498921394 -7.761981964  
 H 1.343579292 -0.858884931 -9.882036209  
 H 0.142895281 -2.833786964 -8.952796936  
 H -2.959002256 2.114589930 -8.821982384  
 H -1.719987512 4.252925396 -8.763332367  
 P -2.373110533 -0.749310315 -2.636500835  
 C -1.167389989 -2.025563955 -3.198621988  
 C 0.058502551 -2.192058802 -2.485814095  
 C -1.360860348 -2.681589127 -4.420141697

C 0.979901075 -3.052299976 -3.057998419  
 C 0.408233851 -1.585736275 -1.164061904  
 C -0.387231141 -3.521345377 -4.990093708  
 H -2.286871195 -2.531033039 -4.963030338  
 C 0.781850100 -3.688969374 -4.280094147  
 O 2.207838535 -3.399680614 -2.551479816  
 C 0.356982440 -2.405714035 -0.051875263  
 C 0.905888796 -0.262353331 -0.947058439  
 H -0.546151698 -4.008274555 -5.945451736  
 O 1.874604225 -4.454010010 -4.592556477  
 C 2.829698086 -4.222673416 -3.545075417  
 C 0.740073025 -1.999547720 1.222112060  
 O -0.064490728 -3.712599993 -0.011226571  
 C 1.315034032 0.119984604 0.335515529  
 P 0.846310079 0.949408412 -2.351246595  
 H 3.698991299 -3.696749687 -3.958587646  
 H 3.117243528 -5.180754185 -0.096368074  
 C 1.239739537 -0.737422705 1.447704911  
 O 0.569178939 -3.027646780 2.112606764  
 C -0.032999530 -4.095978737 1.368227005  
 H 1.715499043 1.112522364 0.494867504  
 H 1.563013315 -0.421010286 2.433126688  
 H 0.569605172 -5.004611015 1.480460763  
 H -1.058969855 -4.253133774 1.725547552  
 C 1.862345219 2.366304636 -1.764275670  
 C 3.094503641 2.725762129 -2.333420515  
 C 1.358987331 3.144786119 -0.705863416  
 C 3.813187599 3.815252066 -1.837012172  
 H 3.499338388 2.160707951 -3.165891409  
 C 2.092650414 4.215754032 -0.197359860  
 H 0.380604088 2.924814939 -0.292664677  
 C 3.323430538 4.556889534 -0.760935545  
 C 1.857562542 0.133594319 -3.643970013  
 C 1.301639557 -0.022086920 -4.921260357  
 C 3.139016628 -0.377678871 -3.386377335  
 C 2.014081717 -0.668411732 -5.931926250  
 H 0.293813109 0.331751078 -5.116308212  
 C 3.860502720 -1.002735496 -4.402111530  
 H 3.564663172 -0.290975422 -2.390655279  
 C 3.297688007 -1.152542949 -5.673918724  
 C -2.703959703 -1.088830590 -0.873522043  
 C -2.677484274 0.008284226 0.002003334  
 C -2.954840660 -2.373608351 -0.369256020  
 C -2.900878906 -0.181945816 1.366029024  
 H -2.459763527 1.002614975 -0.382704288  
 C -3.195338249 -2.554055929 0.992515445  
 H -2.935976267 -3.231244564 -1.035709262  
 C -3.161432028 -1.460290909 1.862111092  
 C -3.916416645 -1.093951464 -3.550534725  
 C -4.006762505 -0.519946396 -4.828940392  
 C -5.003216267 -1.817200184 -3.042593479  
 C -5.156728745 -0.684238255 -5.596652508  
 H -3.182490110 0.076360241 -5.206986904  
 C -6.158249378 -1.969900727 -3.810721159  
 H -4.961492062 -2.242135525 -2.044984579  
 C -6.235774040 -1.408467770 -5.086241722  
 H -1.054904342 3.188319206 -10.018969536  
 C -4.857299805 2.637359858 -6.690222263  
 C -3.533715963 2.570678949 -6.221508980  
 C -3.283465624 2.713318348 -4.830532074  
 C -4.311540127 2.925591469 -3.908273935  
 C -5.613080502 2.990686417 -4.395233631  
 C -5.882063866 2.847866535 -5.772960186  
 C -2.247749805 2.376367092 -6.846336842  
 C -1.322042346 2.430197716 -5.830644608  
 N -1.912512183 2.618498564 -4.577778816  
 H -5.078304768 2.534043074 -7.750751495  
 H -4.078235626 3.019546509 -2.851079702  
 H -6.437354565 3.151555538 -3.705141068  
 H -6.910462379 2.904746771 -6.121234894  
 H -1.542048454 3.634338379 -3.810874939  
 H -0.244909212 2.347598314 -5.904801846  
 H -5.224107265 -0.2066060395 -6.568460941  
 H -7.142292023 -1.520213485 -5.674901009  
 H -7.002386570 -2.522877455 -3.407084465

H -3.407443762 -3.548515797 1.377248406  
H -3.334773540 -1.606958747 2.924904823  
H -2.865412235 0.669522941 2.040265799  
H 1.677779794 4.807250977 0.612035096  
H 3.887677193 5.401014328 -0.374475420  
H 4.762897968 4.080407143 -2.294628382  
H 4.859386444 -1.381882787 -4.199329853  
H 3.857058287 -1.654152036 -6.459394932  
H 1.559058547 -0.797603428 -6.909086704  
C 0.150025278 7.319141388 -0.279103607  
C -0.473880500 7.368403435 0.969274104  
C -1.429453015 6.394410133 1.262962341  
C -0.091874108 8.423743248 1.980178475  
H 0.905515909 8.064255714 -0.521113873  
C -0.152100280 6.339242935 -1.228468060  
C -1.932642341 6.420442104 2.227662802  
H -1.758183837 5.378898621 -0.357928067  
C -1.119348407 5.353145599 -0.904485643  
C 0.624437809 6.356579781 -2.527637720  
C -2.787930727 4.353929043 0.785337210  
C -1.431775689 4.248680115 -1.875417590  
O -1.337232113 4.559459209 -3.126912594  
O -1.744856238 3.105368137 -1.466090560  
H -2.310620070 3.399847507 1.031780601  
H -3.331542015 4.708270550 1.666951895  
H -3.507384539 4.135573864 -0.007164459  
H -0.015002115 6.626708984 -3.371083021  
H 1.450092912 7.071804523 -2.461739779  
H 1.041392803 5.372021675 -2.754473448  
H 0.791549504 8.114778519 2.553695202  
H 0.155986443 9.373099327 1.493902445  
H -0.898075104 8.607914925 2.696793795

O 0.843759358 -2.970814705 1.937286973  
C 0.386987865 -4.086535931 1.161748528  
H 1.853446245 1.218134046 0.350828797  
H 1.806131482 -0.353421360 2.266631842  
H 1.168395042 -4.859214783 1.133452296  
H -0.536932766 -4.479147434 1.601729155  
C 1.966072202 2.465301514 -1.905882001  
C 3.205046177 2.806576252 -2.467515945  
C 1.457087278 3.249511719 -0.854442954  
C 3.933450460 3.884863615 -1.961779237  
H 3.607819796 2.235133171 -3.296854258  
C 2.197837353 4.311277390 -0.339129329  
H 0.472163647 3.035774231 -0.453137368  
C 3.441064835 4.629138947 -0.889424980  
C 1.903849959 0.212483779 -3.772364616  
C 1.309625268 0.005093109 -5.024751663  
C 3.187169313 -0.301299661 -3.528580666  
C 1.992364645 -0.685229063 -6.026555538  
H 0.293018013 0.343185991 -5.199513435  
C 3.876391649 -0.976111174 -4.535344124  
H 3.637966156 -0.181556389 -2.547286272  
C 3.279444695 -1.168904305 -5.785151005  
C -2.573652983 -0.871257901 -0.933671951  
C -2.697320461 0.218605742 -0.059308447  
C -2.621859312 -2.176731825 -0.419919848  
C -2.880088568 0.003493676 1.307996511  
H -2.617142439 1.230141640 -0.449001193  
C -2.808693647 -2.386135340 0.945391834  
H -2.456673861 -3.027610779 -1.075164795  
C -2.938570738 -1.296919107 1.811904550  
C -3.925454855 -0.956306994 -3.505513191  
C -4.343390465 -0.169002309 -4.593927383  
C -4.714136600 -2.056705475 -3.098355770  
C -5.15605450 -0.485701382 -5.284365177  
H -3.755768061 0.696126640 -4.898192406  
C -5.888540268 -2.366156340 -3.781813383  
H -4.422775269 -2.664951086 -2.241647482  
C -6.288062096 -1.586213231 -4.881170750  
H 0.162004337 1.946068406 -9.751550674  
C -4.411466122 2.524430513 -7.031868935  
C -3.133885860 2.587290525 -6.445528507  
C -3.015832186 3.047893763 -5.110759735  
C -4.116493702 3.448112249 -4.350450993  
C -5.368225574 3.379610300 -4.953484535  
C -5.513921738 2.924253941 -6.281319141  
C -1.795193672 2.272936106 -6.898905754  
C -0.956310689 2.592267036 -5.861918926  
N -1.672409415 3.006770849 -4.735260487  
H -4.535642147 2.173136473 -8.053621292  
H -3.981003284 3.784685135 -3.327693224  
H -6.249391079 3.678764820 -4.391825676  
H -6.505942822 2.885153770 -6.723359108  
H -1.366718769 3.785960913 -4.053528786  
H 0.121568732 2.545619965 -5.813201427  
H -5.821208000 0.145807996 -6.119067192  
H -7.205380917 -1.830550551 -5.410587801  
H -6.494320393 -3.216920853 -3.455280781  
H -2.842433453 -3.400808096 1.335537553  
H -3.071931601 -1.462797761 2.87756357  
H -2.964823008 0.854339123 1.979383588  
H 1.782339573 4.908223629 0.466940552  
H 4.014645100 5.463742256 -0.495301843  
H 4.892220020 4.138334751 -2.406745434  
H 4.874865532 -1.360431910 -4.341487408  
H 3.811953306 -1.709138870 -6.563522339  
H 1.502196193 -0.864836276 -6.978436947  
C -0.267353714 7.242946148 0.407243758  
C -0.914578259 6.994018078 1.617745519  
C -1.775346041 5.897390366 1.681297660  
C -0.668958426 7.859387398 2.831536770  
H 0.404279143 8.096403122 0.334070921  
C -0.445390999 6.431950092 -0.720211267  
H -2.303119421 5.692524433 2.611225843  
C -1.974911690 5.043329239 0.592212558  
C -1.298384190 5.301354885 -0.626156211

VIII<sub>sc</sub>

Cu -1.346984744 1.588208675 -2.978189230  
H 0.759692609 1.876413107 -8.085754395  
C -0.056048457 2.242515087 -8.720762253  
C -1.415316701 1.700499535 -8.247342110  
C -1.501455069 0.164032042 -8.258664131  
C -2.638854980 -0.470892280 -7.729524136  
C -0.500110626 -0.649147749 -8.809896469  
C -2.776357412 -1.857522488 -7.754338264  
C -0.630090296 -2.042687416 -8.831796646  
C -1.770115972 -2.654220581 -8.310659409  
H -3.427898884 0.125170112 -7.284601212  
H 0.395581394 -0.204719782 -9.233441353  
H -3.671167612 -2.310740948 -7.331971645  
H 0.164834946 -2.648112059 -9.263329506  
H -1.874785066 -3.736709356 -8.337208748  
H -2.173620701 2.055154800 -8.962267876  
H -0.055348594 3.335146427 -8.673297882  
P -2.331989050 -0.495642483 -2.712441683  
C -1.153581381 -1.788110256 -3.301382542  
C 0.071759701 -2.037320852 -2.609699011  
C -1.400420189 -2.413552523 -4.529913902  
C 0.931250632 -2.941924572 -3.211226940  
C 0.500677168 -1.465797424 -1.296723843  
C -0.489739954 -3.302511454 -5.126495838  
H -2.318957090 -2.197313070 -5.062217712  
C 0.677152932 -3.547976971 -4.436821461  
O 2.153015375 -3.352687836 -2.737185240  
C 0.534237027 -2.314266920 -0.204864189  
C 0.996909201 -0.144091681 -1.076545477  
H -0.688769400 -3.748726130 -6.092950821  
O 1.728336453 -4.356579304 -4.786557198  
C 2.703578949 -4.209328651 -3.743577719  
C 0.970582306 -1.926934004 1.056691885  
O 0.122721471 -3.625819206 -0.168182284  
C 1.458565116 0.222862288 0.192941397  
P 0.927281737 1.067443848 -2.477535725  
H 3.608678579 -3.746273041 -4.156379700  
H 2.922261000 -5.191578388 -3.306759596  
C 1.448741078 -0.657010972 1.289072037

C 0.330410540 6.794681072 -1.968491912  
 C -2.907968283 3.868900061 0.794745386  
 C -1.437469244 4.368698597 -1.810899019  
 O -1.289626598 4.856164455 -2.965971231  
 O -1.663107038 3.130592346 -1.575224280  
 H -2.332933903 2.951885700 0.951585174  
 H -3.542913675 4.034592628 1.671456456  
 H -3.543743610 3.686090946 -0.073722459  
 H -0.337426960 7.123685360 -2.767607212  
 H 1.046077847 7.593607426 -1.747242451  
 H 0.878741920 5.935586929 -2.362000465  
 H 0.056374602 7.389806747 3.508929253  
 H -0.269811690 8.839733124 2.553606987  
 H -1.588692427 8.016578674 3.405334234

H 0.843409061 -5.852189064 -1.768684149  
 C 4.108074665 -5.679536819 0.314324021  
 H 3.581166506 -3.626187563 0.699425995  
 C 3.739742756 -6.872442722 -0.314461797  
 C -2.856282234 -3.182994843 0.771040142  
 C -2.566362381 -1.833622694 0.538867652  
 C -3.523249626 -3.556537628 1.949565649  
 C -2.944221973 -0.865156114 1.467219114  
 H -2.033006191 -1.544101119 -0.358739316  
 C -3.915374994 -2.583327055 2.866398335  
 H -3.722153187 -4.604516506 2.153685331  
 C -3.623576880 -1.237051010 2.628189564  
 C -3.751921654 -5.370337486 -0.950084507  
 C -3.588129282 -6.430075169 -1.860716701  
 C -5.050617695 -4.987694740 -0.580998659  
 C -4.693462849 -7.123899937 -2.347208738  
 H -2.594458103 -6.694250107 -2.212922335  
 C -6.156688213 -5.670971394 -1.090039611  
 H -5.205559254 -4.157648087 0.099181116  
 C -5.982197285 -6.744620323 -1.963418365  
 H -3.881792307 -3.776112556 -5.010514736  
 C -1.302127481 -4.906627655 -6.715166569  
 C -0.503892899 -4.398967743 -5.651763916  
 C -0.120171331 -2.986927748 -5.638625622  
 C -0.551618040 -2.127354860 -6.685063362  
 C -1.322600722 -2.660197020 -7.692183495  
 C -1.697683692 -4.045207024 -7.709908009  
 C 0.043901335 -4.938209534 -4.485495090  
 C 0.712176681 -3.832835197 -3.839374065  
 N 0.622609258 -2.662288666 -4.551376820  
 H -1.587723851 -5.955606937 -6.739036560  
 H -0.263854176 -1.079513669 -6.675304890  
 H -1.659080625 -2.021826506 -8.505473137  
 H -2.303069115 -4.410723209 -8.535249710  
 H 0.022881955 -5.965409279 -4.143796921  
 H 1.533567190 -3.956384420 -3.145369053  
 H 4.889099598 -0.978826523 -2.987767935  
 H 3.708646297 1.190057397 -3.269722700  
 H 1.393445253 1.456369042 -2.395945549  
 H -2.704640865 0.177369580 1.281991720  
 H -3.917396069 -0.481953919 3.351549864  
 H -4.440667152 -2.876263142 3.771130085  
 H -7.156410217 -5.363114357 -0.797155797  
 H -6.845462799 -7.276350021 -2.352259874  
 H -4.550970554 -7.945528984 -3.042847633  
 H 2.269645691 -7.860912800 -1.546995997  
 H 4.364414215 -7.755288124 -0.212976292  
 H 5.019682407 -5.632746696 0.903300881

=====  
 IV<sub>s</sub>  
 =====

Cu -0.840274096 -3.669593811 -2.142092228  
 H -4.276721478 -4.321354866 -3.373173237  
 C -3.453622818 -4.146824360 -4.065643311  
 C -2.465946436 -3.128362656 -3.604769707  
 C -2.863988638 -1.897208571 -2.968402863  
 C -4.140262604 -1.690865278 -2.390352249  
 C -1.934896588 -0.820779383 -2.978121996  
 C -4.476478100 -0.452413321 -1.862451553  
 C -2.279620409 0.410936505 -2.435684443  
 C -3.551525116 0.600425601 -1.881907344  
 H -4.857879162 -2.503837585 -2.359515429  
 H -0.957846642 -0.983363569 -3.430109024  
 H -5.458730698 -0.298886865 -1.425607085  
 H -1.566885591 1.230569601 -2.458518267  
 H -3.825613499 1.567386985 -1.469310164  
 H -1.608770132 -3.016451120 -4.257297993  
 H -2.959692955 -5.090436935 -4.298278809  
 P -2.270853758 -4.451168060 -0.403517008  
 C -1.275918484 -5.611198902 0.620367885  
 C -0.249365106 -5.086131573 1.468516469  
 C -1.427749634 -6.997303486 0.477929860  
 C 0.560303450 -6.026244164 2.079746485  
 C -0.013345994 -3.653606653 1.828348398  
 C -0.585950494 -7.924958229 1.115294576  
 H -2.232043266 -7.389628887 -0.129630834  
 C 0.420006037 -7.403275013 1.898902059  
 O 1.603399515 -5.779119492 2.927949667  
 C -0.374893576 -3.228190899 3.092221260  
 C 0.659427524 -2.690119743 1.018696189  
 H -0.722654402 -8.993535995 0.998080552  
 O 1.371681690 -8.064336777 2.614201546  
 C 2.219514132 -7.051127911 3.182795286  
 C -0.129603758 -1.937584639 3.563516855  
 O -1.036846519 -3.950004101 4.046105385  
 C 0.931061208 -1.409486175 1.512727022  
 P 1.018813968 -3.152521372 -0.710355520  
 H 3.199823856 -7.081724644 2.691028118  
 H 2.301541805 -7.208619595 4.262113571  
 C 0.542789519 -1.006570578 2.802253485  
 O -0.640279293 -1.799343228 4.820537090  
 C -1.170205355 -3.084555864 5.184718609  
 H 1.462485552 -0.698002160 0.892552078  
 H 0.755896151 -0.012793477 3.178927660  
 H -0.596227169 -3.493017197 6.025374413  
 H -2.230377674 -2.980089664 5.437670231  
 C 1.959174156 -1.771879673 -1.447531939  
 C 3.259816408 -1.917160988 -1.946067810  
 C 1.288128853 -0.549688339 -1.631487489  
 C 3.882463217 -0.851463318 -2.600337505  
 H 3.789471865 -2.857633829 -1.834830523  
 C 1.919627666 0.513960719 -2.268984556  
 H 0.268487602 -0.430796713 -1.275274038  
 C 3.220221758 0.365197062 -2.759934902  
 C 2.134964705 -4.594108582 -0.581658781  
 C 1.769352198 -5.797285080 -1.203008771  
 C 3.305422306 -4.545267582 0.190171674  
 C 2.566787243 -6.931804657 -1.069999933

=====  
 III<sub>SN-TS'</sub>  
 =====

Cu -0.823786378 -3.853306770 -2.048249006  
 H -4.426306725 -4.436753750 -3.305467367  
 C -3.596511602 -4.307339191 -4.002959728  
 C -2.615408897 -3.264432669 -3.609330893  
 C -2.980191469 -1.986794710 -3.068788767  
 C -4.269419670 -1.702665210 -2.553420544  
 C -2.001581192 -0.955416441 -3.073886633  
 C -4.570114613 -0.430658847 -2.087873697  
 C -2.312468529 0.311766982 -2.603745699  
 C -3.598879814 0.579269052 -2.115821123  
 H -5.021553993 -2.483833075 -2.518993855  
 H -1.008785844 -1.182289720 -3.451612473  
 H -5.560406208 -0.216323748 -1.697289109  
 H -1.561019182 1.095856547 -2.623322248  
 H -3.845660925 1.573921442 -1.754664302  
 H -1.697597623 -3.281807899 -4.186821938  
 H -3.090834856 -5.260385513 -4.168183327  
 P -2.317965269 -4.511965275 -0.358317226  
 C -1.333247185 -5.642676353 0.706289470  
 C -0.274795473 -5.096077919 1.499223590  
 C -1.491189957 -7.032046795 0.610949755  
 C 0.564993501 -6.017165184 2.097861767  
 C -0.024621254 -3.655994177 1.816062450

C -0.620472908 -7.939944744 1.238087773  
H -2.319040060 -7.442218304 0.048220538  
C 0.421726197 -7.398451328 1.958338618  
O 1.652828336 -5.745370865 2.877964735  
C -0.403104305 -3.186728001 3.058866024  
C 0.698443234 -2.739422321 0.996702075  
H -0.758914769 -9.011838913 1.154658675  
O 1.418761134 -8.038237572 2.628878117  
C 2.295809746 -7.007091999 3.119002104  
C -0.121284537 -1.895340323 3.505382776  
O -1.100286126 -3.866794825 4.019162655  
C 1.007773519 -1.458911061 1.468143344  
P 1.072598100 -3.265681267 -0.714179575  
H 3.241639614 -7.040897369 2.564330816  
H 2.448361635 -7.141365051 4.193751335  
C 0.603387892 -1.009400845 2.737808466  
O -0.641284525 -1.713243365 4.753627777  
C -1.285502076 -2.947913647 5.107758999  
H 1.577126861 -0.781440079 0.843323290  
H 0.847715259 -0.015927533 3.096347570  
H -0.823427856 -3.356034756 6.013744831  
H -2.357242823 -2.768786192 5.251305580  
C 1.888376713 -1.855145216 -1.533646345  
C 3.124285460 -1.956003666 -2.181999445  
C 1.144717693 -0.668041289 -1.655894160  
C 3.613395452 -0.882155418 -2.928189754  
H 3.697517633 -2.875456810 -2.134649515  
C 1.639873147 0.403575122 -2.392878056  
H 0.171848491 -0.583273411 -1.178480744  
C 2.877401114 0.297058165 -3.035656691  
C 2.283116579 -4.627130032 -0.531327128  
C 1.888964891 -5.935727119 -0.854346871  
C 3.562410831 -4.408160210 0.002650746  
C 2.772085667 -7.001126289 -0.685206294  
H 0.873221040 -6.129882336 -1.190733552  
C 4.447877407 -5.474241257 0.162954047  
H 3.865899324 -3.406033516 0.292840570  
C 4.057585716 -6.769564629 -0.189780891  
C -2.881613493 -3.180206537 0.749969125  
C -2.587976694 -1.849843025 0.428726345  
C -3.562027693 -3.474699259 1.942399740  
C -2.971410275 -0.820664585 1.286862850  
H -2.045145273 -1.623465061 -0.482246101  
C -3.960128784 -2.441375971 2.788328409  
H -3.764624834 -4.506758213 2.213253736  
C -3.661745310 -1.114295721 2.464249134  
C -3.811186314 -5.430593014 -0.871027708  
C -3.658056498 -6.531276226 -1.734400392  
C -5.106082439 -5.017014503 -0.522788227  
C -4.770615101 -7.232809067 -2.193614244  
H -2.666695833 -6.822683334 -2.071771383  
C -6.219168663 -5.709663868 -1.004311323  
H -5.252922058 -4.156877041 0.120990932  
C -6.056077957 -6.822077274 -1.830755353  
H -4.016720772 -3.997750044 -4.977369308  
C -1.294628263 -4.253833771 -7.011888981  
C -0.586566567 -4.293839931 -5.783214092  
C 0.044195805 -3.080116034 -5.274398327  
C -0.063726313 -1.859137774 -6.000641823  
C -0.761397004 -1.860541940 -7.186690331  
C -1.374382973 -3.053702831 -7.690212250  
C -0.313945293 -5.294317245 -4.818521023  
C 0.431038350 -4.648650646 -3.816234589  
N 0.655403554 -3.287383795 -4.088416576  
H -1.763675570 -5.150735855 -7.411151886  
H 0.420011967 -0.962556362 -5.618558407  
H -0.850251317 -0.943602145 -7.765643120  
H -1.911532044 -3.003507137 -8.635261536  
H -0.574143052 -6.344705582 -4.860126972  
H 1.057761908 -5.128382683 -3.073051929  
H 4.570520878 -0.974719286 -3.433936357  
H 3.261914730 1.128629684 -3.619374275  
H 1.061333776 1.320860982 -2.471299410  
H -2.729167223 0.207382679 1.034874558  
H -3.961412907 -0.312546641 3.133099318

H -4.498336792 -2.671311140 3.703860044  
H -7.216093540 -5.378845215 -0.726600409  
H -6.924802780 -7.361348152 -2.196945429  
H -4.635540962 -8.085968971 -2.852125406  
H 2.452910423 -8.009446144 -0.932108998  
H 4.750942707 -7.597513676 -0.070116542  
H 5.441742897 -5.294312954 0.563553214

III<sub>sc</sub>-TS'

Cu -0.700339794 -3.834658384 -2.084500790  
H -4.269134521 -4.050202847 -3.242482662  
C -3.431284666 -3.967231035 -3.933312893  
C -2.353105783 -3.047969818 -3.473814964  
C -2.679010630 -1.765162945 -2.897544146  
C -3.952841043 -1.457354665 -2.358418941  
C -1.705276608 -0.735887468 -2.972363949  
C -4.241164684 -0.170994535 -1.926951647  
C -2.002185822 0.547610760 -2.529738903  
C -3.269401789 0.835085988 -2.010074615  
H -4.708786488 -2.230955124 -2.278195381  
H -0.735447824 -0.966645896 -3.408456087  
H -5.221607208 0.056770366 -1.519386053  
H -1.254365802 1.330904841 -2.607267857  
H -3.504667521 1.841957450 -1.676308632  
H -1.486080170 -3.008081436 -4.124628544  
H -3.041583061 -4.958607197 -4.158849716  
P -2.303879023 -4.444435120 -0.419791669  
C -1.336258531 -5.649159431 0.569080353  
C -0.277949750 -5.155136108 1.394577622  
C -1.504656196 -7.027574062 0.389151484  
C 0.550541878 -6.113528728 1.945325136  
C -0.057937503 -3.737003803 1.808761597  
C -0.644121110 -7.975348949 0.967545450  
H -2.334479094 -7.396037102 -0.198744997  
C 0.396479607 -7.483571529 1.725283027  
O 1.619110942 -5.897177219 2.768226624  
C -0.497840345 -3.344281197 3.059306383  
C 0.648751199 -2.752057314 1.056385994  
H -0.794024527 -9.039527893 0.827638149  
O 1.368399620 -8.169964790 2.386709690  
C 2.244160414 -7.177355289 2.950514078  
C -0.293227047 -2.062015057 3.569899082  
O -1.216816545 -4.089008808 3.952391863  
C 0.887112439 -1.484106779 1.597883701  
P 1.100088954 -3.182656527 -0.666272402  
H 3.200639486 -7.189541340 2.413259983  
H 2.373698711 -7.371955872 4.018678665  
C 0.419160366 -1.112464428 2.870380402  
O -0.887007117 -1.950403929 4.792347908  
C -1.448392510 -3.239771605 5.088622570  
H 1.449143291 -0.753921926 1.029227734  
H 0.598728061 -0.124437422 3.278392315  
H -0.951476872 -3.662456512 5.969730854  
H -2.526769161 -3.135738611 5.248260021  
C 1.937703252 -1.710808277 -1.362245321  
C 3.217803001 -1.771536827 -1.927847743  
C 1.215014338 -0.507111847 -1.444666266  
C 3.760581970 -0.650586247 -2.561409471  
H 3.792121649 -2.691498280 -1.886218667  
C 1.767168045 0.611564517 -2.062511206  
H 0.217082262 -0.441512913 -1.023486972  
C 3.041622877 0.541892886 -2.631076097  
C 2.348716021 -4.502590656 -0.521999896  
C 2.142186403 -5.701802731 -1.217137098  
C 3.468431234 -4.368364334 0.311190724  
C 3.047350883 -6.753748894 -1.093400598  
H 1.259388208 -5.815071106 -1.839029312  
C 4.379578114 -5.417309761 0.425710261  
H 3.622616291 -3.447434425 0.866326511  
C 4.169865131 -6.609213352 -0.275319964  
C -2.855255365 -3.153457880 0.750186741  
C -2.519003868 -1.813901067 0.520795465  
C -3.602840662 -3.493717909 1.890380621

C -2.938480854 -0.822502136 1.406916857  
H -1.924237967 -1.547998071 -0.344420850  
C -4.032758236 -2.497876644 2.765527725  
H -3.843796253 -4.532892227 2.093192816  
C -3.700211525 -1.161201835 2.525702000  
C -3.831108093 -5.285544395 -0.974474728  
C -3.726078987 -6.357606888 -1.879867792  
C -5.109581470 -4.816057682 -0.630161643  
C -4.867991924 -6.980597973 -2.378262758  
H -2.748804331 -6.681489468 -2.226543188  
C -6.250855923 -5.430047989 -1.149206638  
H -5.224046230 -3.968448877 0.035393190  
C -6.134874821 -6.518996716 -2.013005495  
H -3.811532021 -3.560782909 -4.884706020  
C -1.529834270 -5.187751770 -6.303341389  
C -0.570039928 -4.549709797 -5.480601311  
C -0.227355570 -3.161249638 -5.713493347  
C -0.841099739 -2.444922924 -6.759773254  
C -1.777311325 -3.099556208 -7.543107986  
C -2.118224859 -4.463088036 -7.320358276  
C 0.137086198 -4.908436298 -4.311702728  
C 0.951935470 -3.742928743 -4.004777908  
N 0.706661224 -2.697007179 -4.806296825  
H -1.801555991 -6.226747036 -6.133643627  
H -0.574579358 -1.407551289 -6.937497616  
H -2.264383316 -2.563649416 -8.353399277  
H -2.853516817 -4.933346272 -7.966840267  
H 0.257852048 -5.902669430 -3.901155949  
H 1.811065555 -3.727141380 -3.346371412  
H 4.749538898 -0.715331197 -3.004859447  
H 3.466987848 1.409641266 -3.125774622  
H 1.201181293 1.538226604 -2.105837584  
H -2.668311596 0.212413967 1.220849395  
H -4.029724121 -0.388389945 3.214201212  
H -4.626546383 -2.764250040 3.635638952  
H -7.231706142 -5.053881645 -0.872059762  
H -7.026187897 -6.995178699 -2.410557508  
H -4.769649029 -7.811967373 -3.069813251  
H 2.876109362 -7.681509972 -1.631078720  
H 4.881347179 -7.424759865 -0.184080690  
H 5.251739502 -5.306567192 1.063352585

=====  
**I<sub>s</sub>-TS''**  
=====

Cu -0.125766084 -0.422624946 -3.334456921  
P -0.706540167 -2.444012403 -2.237899542  
C 0.687170625 -3.226526976 -1.309167385  
C 1.273892879 -2.500641108 -0.224822134  
C 1.228140950 -4.456608295 -1.701008081  
C 2.366600990 -3.096897364 0.377713144  
C 0.756543994 -1.224834204 0.362882078  
C 2.355367184 -5.022055626 -1.078620791  
H 0.771315098 -5.006462097 -2.514316082  
C 2.909596443 -4.309043884 -0.039955042  
O 3.079655170 -2.619488955 1.449348092  
C 0.076377325 -1.283654690 1.565642953  
C 0.968084335 0.084114864 -0.167649075  
H 2.764442444 -5.973941326 -1.397998214  
C 3.986354351 -4.633993149 0.743108332  
C 4.180763245 -3.518214703 1.624435186  
C -0.421744913 -0.158621609 2.217704296  
O -0.215169311 -2.407800913 2.297737122  
C 0.471355021 1.207518935 0.500180244  
P 1.734002948 0.230069220 -1.831123114  
H 5.113512993 -3.004428625 1.357796669  
H 4.200351715 -3.871631384 2.661401033  
C -0.239900470 1.108781338 1.709504604  
O -1.049120307 -0.533102512 3.379062414  
C -1.045311332 -1.967892289 3.379110336  
H 0.633613467 2.191110134 0.073392496  
H -0.621919990 1.984979272 2.221352577  
H -0.630803347 -2.331142664 4.325849056  
H -2.068114281 -2.334014654 3.220817804  
C 2.092207670 2.024859667 -2.045606852

C 3.327887774 2.622515917 -1.754002690  
C 1.071576715 2.812203407 -2.608675003  
C 3.534760237 3.978486061 -2.010776043  
H 4.137626171 2.031667709 -1.339650154  
C 1.279264569 4.169700623 -2.850703716  
H 0.125162244 2.342715979 -2.870734453  
C 2.511666775 4.756148338 -2.555300236  
C 3.401022434 -0.510933042 -1.602958918  
C 3.937923670 -1.256520391 -2.661942482  
C 4.152091980 -0.340485781 -0.430096328  
C 5.216569424 -1.806665182 -2.554439783  
H 3.343766451 -1.422691226 -3.556875944  
C 5.433270454 -0.882237256 -0.330962837  
H 3.726868391 0.205623955 0.406776160  
C 5.967062950 -1.616999984 -1.393309474  
C -1.995951653 -2.235183001 -0.953111410  
C -2.694513798 -1.021807432 -0.899347007  
C -2.292150974 -3.249687195 -0.029548272  
C -3.684363604 -0.829217613 0.065802082  
H -2.437977076 -0.236025840 -1.607361555  
C -3.292988062 -3.058675051 0.921471596  
H -1.735302091 -4.182130814 -0.054719601  
C -3.988748789 -1.846369624 0.971799016  
C -1.349472642 -3.777382851 -3.325449467  
C -0.548311710 -4.171342850 -4.412336349  
C -2.614604712 -4.361567497 -3.169033766  
C -0.983520091 -5.155945778 -5.297997475  
H 0.407939106 -3.688315630 -4.579298496  
C -3.057224274 -5.330641747 -4.072003365  
H -3.257920980 -4.063004017 -2.348266602  
C -2.242722750 -5.736644745 -5.129748821  
C 2.162830353 -6.670386791 -7.166600448  
C 1.544147253 -5.808603764 -8.074189186  
C 2.819919348 -6.109322071 -6.066433430  
H 1.032441616 -6.227353096 -8.938423157  
H 3.319367647 -6.764531612 -5.355103016  
C 1.552979350 -4.418380737 -7.907299995  
C 2.847993135 -4.729914665 -5.848940849  
C 2.201874733 -3.882484674 -6.773278236  
C 2.132395029 -2.382483244 -6.571043015  
O 2.360925913 -1.576842427 -7.454407692  
O 1.712038636 -2.076764822 -5.337461472  
C -0.785479903 0.922061503 -8.082598686  
C 0.072306275 0.633791924 -7.026745796  
C -0.161848798 -0.504391015 -6.232541561  
C -1.197749257 -1.388966799 -6.474816799  
C -2.037224531 -1.107256651 -7.560846806  
C -1.836950302 0.033193991 -8.347308159  
C 1.245670319 1.291112423 -6.466130733  
C 1.667248249 0.555277467 -5.413542747  
N 0.784772694 -0.533074319 -5.160248280  
H -0.645621836 1.812594771 -8.688887596  
H -1.346260309 -2.260143042 -5.848422527  
H -2.858921289 -1.780312419 -7.787171364  
H -2.510150671 0.234925956 -9.175916672  
H 1.685882807 2.216773272 -6.812184811  
H 2.500928879 0.704704762 -4.746299744  
H -0.341953844 -5.451670647 -6.122444153  
H -2.590887785 -6.495695114 -5.825431824  
H -4.042707920 -5.770887375 -3.942396402  
H -3.527244329 -3.852393627 1.626483321  
H -4.763503075 -1.695361614 1.719184995  
H -4.215631008 0.117624566 0.109944597  
H 0.480473250 4.764880180 -3.285493135  
H 2.677554131 5.811379910 -2.756411076  
H 4.499836445 4.425895691 -1.787127137  
H 6.014966488 -0.731611609 0.575273335  
H 6.963268280 -2.044119835 -1.313709140  
H 5.625748634 -2.389219999 -3.374382496  
C 2.136951685 -8.167615891 -7.364631176  
H 1.841638923 -8.684151649 -6.444332123  
H 1.435864568 -8.456808090 -8.153194427  
H 3.127208948 -8.547685623 -7.644252300  
C 0.850449443 -3.546186924 -8.922994614  
H 1.557258964 -2.872216225 -9.412816048

H 0.356406212 -4.160670757 -9.681188583  
H 0.095581457 -2.907884359 -8.452256203  
C 3.571818352 -4.181360245 -4.641495705  
H 2.875517368 -3.862142086 -3.861133575  
H 4.239116669 -4.933308125 -4.209417820  
H 4.172491550 -3.307225466 -4.908555984  
H -1.256164551 0.668214083 -3.276262760

=====  
**X<sub>s</sub>**  
=====

Cu 0.148355648 -0.664085090 -3.323302507  
P -0.581784487 -2.481903553 -2.138465643  
C 0.789106965 -3.200754166 -1.186528802  
C 1.308001161 -2.482956409 -0.062926963  
C 1.385424614 -4.399079323 -1.609532237  
C 2.393206358 -3.060714483 0.563311458  
C 0.740022302 -1.218196034 0.488506645  
C 2.494619846 -4.952561855 -0.953434289  
H 0.979844272 -4.927578926 -2.463307142  
C 2.983056545 -4.253023624 0.130628511  
O 3.064525604 -2.586586475 1.653491139  
C 0.013664606 -1.257737517 1.663081169  
C 0.930797160 0.075787634 -0.084465548  
H 2.945275784 -5.883076668 -1.278043389  
O 4.032530785 -4.566089630 0.933425665  
C 4.176914215 -3.472911119 1.857774019  
C -0.544055223 -0.120527461 2.253395557  
O -0.291902184 -2.361313820 2.408008337  
C 0.378067225 1.210343361 0.518436015  
P 1.691539526 0.185402364 -1.739829183  
H 5.110552788 -2.941333771 1.640825868  
H 4.156536102 -3.857079506 2.881788015  
C -0.372778624 1.133573771 1.705933213  
O -1.214519262 -0.471000284 3.386862516  
C -1.158368945 -1.904543281 3.461646318  
H 0.528272271 2.182529688 0.061368629  
H -0.796510935 2.016672850 2.169850349  
H -0.745534658 -2.205405712 4.429411888  
H -2.163376093 -2.315232277 3.304885864  
C 1.978108525 1.950514555 -2.094275951  
C 3.188970089 2.598780394 -1.810847878  
C 0.951117396 2.653679609 -2.747421980  
C 3.362964153 3.935038805 -2.172596455  
H 4.000655651 2.060225964 -1.332183838  
C 1.126203299 3.990740538 -3.096503258  
H 0.024751609 2.145344019 -3.006308794  
C 2.334769011 4.631037235 -2.812192917  
C 3.307686567 -0.646330118 -1.673228979  
C 3.681729794 -1.434438109 -2.772266626  
C 4.174491882 -0.519457817 -0.576709628  
C 4.914429665 -2.088586807 -2.774610519  
H 3.002741575 -1.534030914 -3.615956068  
C 5.410354614 -1.166078091 -0.591956854  
H 3.874157429 0.060599815 0.291179776  
C 5.780933857 -1.953599930 -1.687181830  
C -1.939416885 -2.152901173 -0.990809321  
C -2.613013983 -0.925214767 -1.050571799  
C -2.312220812 -3.117537498 -0.040193141  
C -3.656430721 -0.661475420 -0.164427936  
H -2.309251308 -0.183031052 -1.783851862  
C -3.369514227 -2.853804588 0.829061389  
H -1.774899483 -4.059224606 0.023489865  
C -4.034647465 -1.624566555 0.773864448  
C -1.098631144 -3.722857952 -3.360592127  
C -0.269000411 -3.921482563 -4.479003429  
C -2.311080933 -4.419947147 -3.255850792  
C -0.633378506 -4.838642597 -5.462752342  
H 0.644301057 -3.340303898 -4.591326714  
C -2.674030542 -5.327146053 -4.252803326  
H -2.969485044 -4.258610249 -2.408182859  
C -1.837148190 -5.541090965 -5.350413799  
C 0.726176560 -0.171233073 -8.638603210  
C 1.075947642 0.052593190 -7.301325321  
C 0.321672440 -0.552121758 -6.259462357

C -0.796638310 -1.332280040 -6.541815281  
C -1.130066752 -1.553057790 -7.881488323  
C -0.379674971 -0.976893842 -8.918110847  
C 2.122414112 0.796022713 -6.652641296  
C 1.972872376 0.595397413 -5.296556473  
N 0.928138137 -0.261416614 -5.023153305  
H 1.313510537 0.261354506 -9.444017410  
H -1.406420827 -1.733312607 -5.737752438  
H -1.992906690 -2.168260098 -8.120172501  
H -0.665655911 -1.159021020 -9.950031281  
H 2.910197258 1.361298323 -7.132893085  
H 2.591516256 0.977569640 -4.498775959  
H 0.008913457 -4.984104156 -6.326616764  
H -2.126952410 -6.247820377 -6.122983456  
H -3.613971472 -5.866497040 -4.170415878  
H -3.671646357 -3.605844498 1.552690148  
H -4.850298882 -1.418944836 1.461423993  
H -4.170637131 0.294081599 -0.203996599  
H 0.330469966 4.524507046 -3.607608318  
H 2.479489803 5.668420792 -3.099610090  
H 4.306051254 4.430418968 -1.960770488  
H 6.088887215 -1.050867677 0.249101296  
H 6.741731644 -2.460078239 -1.691918969  
H 5.197619438 -2.702466965 -3.624809265  
H -1.268193841 -0.853129447 -3.807264090

=====  
**I<sub>s</sub>-TS''**  
=====

Cu -0.136550590 -0.431478769 -3.357699871  
P -0.719528258 -2.445119143 -2.248220444  
C 0.686188579 -3.230678320 -1.343284965  
C 1.297017455 -2.506132603 -0.271713465  
C 1.215965867 -4.461112499 -1.748225689  
C 2.401763678 -3.104026794 0.306930125  
C 0.788837612 -1.233392358 0.330092758  
C 2.353114128 -5.030638218 -1.147916555  
H 0.744199216 -5.004934788 -2.557328224  
C 2.930812836 -4.319108486 -0.120974213  
O 3.138513327 -2.629088163 1.364023685  
C 0.126865730 -1.302798510 1.542134404  
C 0.984999239 0.079856142 -0.196173772  
H 2.753703594 -5.982974529 -1.476561904  
O 4.021613121 -4.648269176 0.640697300  
C 4.240822792 -3.531110048 1.514080644  
C -0.365345776 -0.184479669 2.210052490  
O -0.145973936 -2.432888031 2.272108555  
C 0.494113386 1.196542859 0.487244517  
P 1.730158806 0.235641718 -1.868333220  
H 5.168230057 -3.020386219 1.223442316  
H 4.284951687 -3.882065296 2.551036119  
C -0.196574256 1.086935759 1.707744837  
O -0.969559550 -0.569704056 3.379467249  
C -0.967193246 -2.004350185 3.364785194  
H 0.645412564 2.184046984 0.065718040  
H -0.573291481 1.958077550 2.231980085  
H -0.545259297 -2.378149271 4.303900242  
H -1.991628051 -2.367799759 3.211062431  
C 2.071763039 2.035415888 -2.082502604  
C 3.312783718 2.639329195 -1.829603672  
C 1.023966908 2.822984695 -2.594532013  
C 3.495770454 4.003558159 -2.064491510  
H 4.142826557 2.048459530 -1.457265973  
C 1.208053231 4.187567234 -2.814825296  
H 0.075165756 2.346861839 -2.835630655  
C 2.444167614 4.782326698 -2.550283194  
C 3.404082537 -0.494896293 -1.660681486  
C 3.934786797 -1.238792300 -2.724710703  
C 4.165365696 -0.318210304 -0.494989157  
C 5.217535496 -1.781550527 -2.627557278  
H 3.332942724 -1.414326787 -3.613069534  
C 5.449664116 -0.853895903 -0.406861544  
H 3.745872974 0.229052052 0.344157338  
C 5.976755142 -1.588398695 -1.472666144  
C -1.992355943 -2.237277985 -0.947427690

C -2.725461960 -1.044161797 -0.912726104  
C -2.254122734 -3.242056608 -0.002989435  
C -3.716689348 -0.862640858 0.053506915  
H -2.494816065 -0.264626920 -1.636390090  
C -3.256957054 -3.063371658 0.948290646  
H -1.671253681 -4.158576965 -0.014245789  
C -3.988194704 -1.871579528 0.979225874  
C -1.382519245 -3.780777216 -3.321014166  
C -0.620349526 -4.140778065 -4.446147442  
C -2.606537104 -4.426116467 -3.094018459  
C -1.052679777 -5.153661251 -5.301304340  
C 0.306937695 -3.619140625 -4.658478737  
C -3.047441959 -5.422521591 -3.967018366  
H -3.220271349 -4.154177189 -2.242185831  
C -2.269305468 -5.796710014 -5.063194752  
C 2.101536036 -6.758780003 -7.099951267  
C 1.504150271 -5.896461487 -8.022441864  
C 2.767055273 -6.193107128 -6.007029533  
H 0.984886289 -6.316540241 -8.881795883  
H 3.248723507 -6.847122192 -5.282163620  
C 1.544389009 -4.503838062 -7.876345158  
C 2.826280594 -4.810857773 -5.812731266  
C 2.203498125 -3.962925196 -6.751795292  
C 2.160207510 -2.455970764 -6.562172413  
O 2.451124907 -1.662587166 -7.442256927  
O 1.691593409 -2.140103102 -5.358399391  
C -0.574750781 0.929017305 -8.207568169  
C 0.210031658 0.633191109 -7.100578308  
C -0.108909063 -0.474537939 -6.295467377  
C -1.161102891 -1.326349258 -6.574627876  
C -1.930295706 -1.040084243 -7.712556362  
C -1.644240856 0.071386315 -8.511822701  
C 1.376616716 1.275169134 -6.486796856  
C 1.698429346 0.531591296 -5.395359039  
N 0.782143891 -0.520974219 -5.175951958  
H -0.367500216 1.798419476 -8.825408936  
H -1.374334335 -2.177141905 -5.937895298  
H -2.763315916 -1.688043356 -7.969317913  
H -2.262453318 0.276973754 -9.381436348  
H 2.494410992 0.672099710 -4.682795525  
H -0.437928855 -5.428412914 -6.152261257  
H -2.612908602 -6.580333710 -5.733618259  
H -4.000961781 -5.911153793 -3.782894611  
H -3.466681957 -3.851802588 1.666975260  
H -4.765086174 -1.730285406 1.726318479  
H -4.275749207 0.068708912 0.082540318  
H 0.389166057 4.782313347 -3.210497379  
H 2.590800047 5.843252182 -2.734284878  
H 4.464217663 4.456589699 -1.868008137  
H 6.038191319 -0.700501859 0.494428366  
H 6.975263119 -2.011558294 -1.401319623  
H 5.621990204 -2.363695145 -3.449985266  
C 2.049721241 -8.257410049 -7.279732227  
H 1.805651069 -8.762331963 -6.338404655  
H 1.301049590 -8.547648430 -8.023017883  
H 3.018135071 -8.649726868 -7.614533424  
C 0.865811765 -3.627064228 -8.903939247  
H 1.586148858 -2.957256317 -9.379483223  
H 0.380435795 -4.236537933 -9.671834946  
H 0.106754273 -2.984297752 -8.445414543  
C 3.557438135 -4.254104614 -4.613725185  
H 2.865010738 -3.866958380 -3.862059355  
H 4.177245617 -5.020888805 -4.138847828  
H 4.208196640 -3.424429893 -4.906002522  
H -1.269517303 0.657747865 -3.312683821  
C 2.030089140 2.533618450 -6.952515125  
H 1.284359813 3.337501049 -7.023769855  
H 2.416259289 2.387603521 -7.971215248  
C 3.165434122 2.991743088 -6.043222427  
H 2.793555021 3.138176203 -5.016450882  
H 3.951073885 2.216985941 -6.003457546  
O 3.683776855 4.201214314 -6.565896988  
C 4.768377781 4.694651127 -5.806925297  
H 4.482341766 4.887855530 -4.760991096  
H 5.619146347 3.992562532 -5.802538872

H 5.089920521 5.632548332 -6.268558025

XIs

Cu 0.241930068 -0.489052534 -3.220114231  
P -0.476752073 -2.412495375 -2.180478096  
C 0.868113875 -3.157541752 -1.206080914  
C 1.299063444 -2.503947973 -0.008759812  
C 1.530725718 -4.303534985 -1.672151327  
C 2.366341829 -3.090058565 0.641397476  
C 0.657724202 -1.298001647 0.592094183  
C 2.621029139 -4.865494251 -0.989899397  
H 1.191848397 -4.784822464 -2.581700325  
C 3.023474932 -4.229684353 0.167069197  
O 2.954586506 -2.671232700 1.800738573  
C -0.127610177 -1.442071915 1.719385266  
C 0.825749636 0.038434029 0.117267102  
H 3.120950460 -5.756825924 -1.350343943  
O 4.034483910 -4.564761162 1.010042429  
C 4.079188824 -3.538503885 2.017658710  
C -0.757538378 -0.367213070 2.350918055  
O -0.429631650 -2.603521585 2.372134924  
C 0.199433818 1.109513283 0.763071299  
P 1.661500096 0.294221193 -1.484304190  
H 5.007088184 -2.966121197 1.905851126  
H 4.002654552 -3.997422218 3.007823229  
C -0.608304858 0.926407397 1.899404764  
O -1.473244190 -0.817093849 3.420728683  
H -1.371510386 -2.249629259 3.400087595  
H 0.334524304 2.115188837 0.380591601  
H -1.090340376 1.759362221 2.397665977  
H -1.005566001 -2.605451584 4.367835045  
H -2.350324631 -2.679503202 3.154707432  
C 1.905967355 2.091177225 -1.679080486  
C 3.074071169 2.753261328 -1.275314331  
C 0.888129830 2.812931538 -2.325809717  
C 3.215008020 4.121337414 -1.511114478  
H 3.878524065 2.203069687 -0.797802389  
C 1.028450012 4.181003094 -2.548264503  
H -0.003684388 2.296764612 -2.675542593  
C 2.194795847 4.835556030 -2.143438101  
C 3.302049875 -0.486642927 -1.389519215  
C 3.756709576 -1.184911489 -2.518167257  
C 4.105410576 -0.417601764 -0.240856782  
C 5.006182671 -1.805715203 -2.498718739  
H 3.124264956 -1.245351791 -3.400734663  
C 5.358211040 -1.031058788 -0.232953474  
H 3.741095781 0.087440357 0.649142087  
C 5.809453964 -1.727672815 -1.358690500  
C -1.901133180 -2.219993114 -1.080065489  
C -2.631001949 -1.023592949 -1.097299337  
C -2.275573730 -3.262327433 -0.215515614  
C -3.732573271 -0.869536102 -0.256354839  
H -2.326662779 -0.221580967 -1.764654756  
C -3.390616655 -3.108179808 0.606849730  
H -1.696724176 -4.180905819 -0.183503956  
C -4.113454342 -1.910900712 0.592926145  
C -0.904088318 -3.587487698 -3.501709223  
C -0.034937240 -3.675020456 -4.603575230  
C -2.090857029 -4.333933830 -3.489116907  
C -0.335215956 -4.527884483 -5.664113522  
H 0.860023081 -3.057608366 -4.640823364  
C -2.389849663 -5.176108360 -4.561357975  
H -2.780204296 -4.260435104 -2.654351473  
C -1.514629245 -5.277218342 -5.644334793  
C 1.101406693 0.587931812 -8.418428421  
C 1.368103504 0.657594740 -7.047630787  
C 0.598046005 -0.106060825 -6.132429600  
C -0.455509454 -0.902717113 -6.566689014  
C -0.710222781 -0.967492819 -7.941269398  
C 0.054791573 -0.228956223 -8.855780602  
C 2.349344969 1.370286822 -6.261435986  
C 2.126462936 0.991479218 -4.946297646  
N 1.122127533 0.061271451 -4.833450794

H 1.702510834 1.146517158 -9.130858421  
H -1.075521231 -1.435078382 -5.851736546  
H -1.524315238 -1.589967489 -8.301570892  
H -0.170519188 -0.293045133 -9.916314125  
H 2.680838108 1.300192595 -4.074069977  
H 0.337961346 -4.586975574 -6.514110088  
H -1.755416393 -5.932656765 -6.476478100  
H -3.310790300 -5.752280712 -4.549310684  
H -3.694014549 -3.9211345949 1.260680199  
H -4.975420952 -1.791167498 1.243355989  
H -4.291883469 0.061265320 -0.263202846  
H 0.238903299 4.730220795 -3.052407742  
H 2.311926842 5.899178505 -2.329087257  
H 4.124722481 4.628638268 -1.203175187  
H 5.985499859 -0.962420404 0.651756585  
H 6.782200336 -2.210259199 -1.345180035  
H 5.350540638 -2.351600170 -3.372278214  
H -1.147376299 -0.615957856 -3.812054873  
C 3.414327145 2.281538963 -6.777609348  
H 2.957586050 3.076268435 -7.384099483  
H 4.081455231 1.737555623 -7.462336063  
C 4.254206657 2.922981262 -5.676959038  
H 3.605121613 3.484097481 -4.979503155  
H 4.763567448 2.140395164 -5.084841728  
O 5.195371628 3.777457237 -6.289127827  
C 6.046614647 4.415712357 -5.357120037  
H 5.479823112 5.038146496 -4.643285275  
H 6.641844749 3.687504530 -4.781066895  
H 6.727282524 5.057299614 -5.922958374

=====  
**I<sub>p</sub>-TS**  
=====

P 1.222771645 -0.540600896 -0.740547717  
C 1.053233504 1.239948273 -1.293736339  
C 0.158122003 2.091896534 -0.371675193  
P -1.390880585 1.229849815 0.234487742  
C -2.706310987 1.535727620 -1.097148180  
C -2.104445457 2.561508179 1.385308027  
C -3.395539522 2.853525877 -0.705524743  
C -3.519918680 2.838644981 0.822232425  
C 2.050769567 -1.339672685 -2.253246784  
C 2.827715635 -0.552580297 0.264376253  
C 3.491487980 -1.702295899 -1.793405652  
C 3.951662302 -0.648905158 -0.778245151  
C -2.048391581 2.241674423 2.856509686  
C -1.273250222 3.020740509 3.723533392  
C -2.774873972 1.167217970 3.390576124  
C -1.225255013 2.738972664 5.090749264  
C -2.728251457 0.882250547 4.753292561  
C -1.952786207 1.667835951 5.610350609  
C -2.138238907 1.397909999 -2.487046480  
C -1.825104594 0.110305831 -2.956182241  
C -1.841030002 2.493644714 -3.306895971  
C -1.240095615 -0.076388270 -4.206242085  
C -1.247057557 2.309566259 -4.558946133  
C -0.943865716 1.026000500 -5.013525486  
C 2.850881100 0.562855363 1.280086637  
C 3.631531715 1.714957237 1.128773689  
C 1.989874125 0.474826127 2.388569117  
C 3.549584866 2.756594181 2.058044434  
C 1.900379062 1.515978694 3.308845997  
C 2.681491613 2.664098024 3.145823002  
C 1.302433014 -2.516947031 -2.838020802  
C 1.167080522 -2.653011799 -4.225819111  
C 0.766300321 -3.520039082 -2.016066313  
C 0.503304541 -3.750848770 -4.779802322  
C 0.101385526 -4.617320061 -2.563820124  
C -0.036230616 -4.736518383 -3.950143814  
H 0.619566858 1.196874738 -2.296534777  
H 2.043397903 1.702334166 -1.378546119  
H 0.705247819 2.355190754 0.540478289  
H -0.114182882 3.024872780 -0.879546523  
H -3.418652058 0.719805837 -0.934289992  
H -1.494736552 3.455134869 1.199695110

H -4.367056370 2.950243950 -1.202313542  
H -2.789383411 3.717961073 -1.004818916  
H -4.210183620 2.042560577 1.125580430  
H -3.909358740 3.781338930 1.222721219  
H 2.116788864 -0.550904691 -3.012453794  
H 2.780830622 -1.507920742 0.803351521  
H 4.161172390 -1.778967977 -2.657310963  
H 3.474130630 -2.689482212 -1.314801931  
H 4.091515541 0.313130558 -1.287853837  
H 4.910354614 -0.910732627 -0.314478904  
H -0.695704579 3.851306915 3.323674440  
H -3.369513512 0.547681153 2.728063583  
H -0.619569898 3.357555389 5.748306751  
H -3.296819210 0.043788522 5.147286415  
H -1.916530132 1.445666194 6.673331738  
H -2.017372847 -0.741086185 -2.312910557  
H -2.073303699 3.501485586 -2.977208853  
H -1.004689932 -1.081768155 -4.541137695  
H -1.024076700 3.174213648 -5.179068089  
H -0.484606147 0.884721339 -5.988521576  
H 4.312779903 1.806782007 0.288252026  
H 1.351173997 -0.399306476 2.494560242  
H 4.167142391 3.641409397 1.926993847  
H 1.207080960 1.437710762 4.140769005  
H 2.614250898 3.477548361 3.863421679  
H 1.577521801 -1.885185838 -4.879070759  
H 0.846007109 -3.425701380 -0.935522020  
H 0.405485809 -3.832110643 -5.859902859  
H -0.320572913 -5.373323441 -1.906223536  
H -0.560092688 -5.586814880 -4.378134251  
C -3.480885744 -1.969285965 -0.145344600  
C -4.066153526 -1.434530020 1.029622078  
H -3.521782160 -1.502457857 1.966475725  
C -5.302985668 -0.796439826 1.000693679  
H -5.714844227 -0.392380565 1.923415184  
C -6.014393806 -0.665360451 -0.197571173  
H -6.976656437 -0.162097335 -0.218858838  
H -6.004151344 -1.125352502 -2.306037188  
C -5.465462208 -1.206374288 -1.364644051  
C -4.230127335 -1.847913980 -1.339953065  
H -3.823094606 -2.262901068 -2.259164095  
C -2.170281649 -2.594309568 -0.149969518  
H -1.771643043 -2.919483662 -1.105870008  
C -1.471471071 -2.968683720 1.028963447  
H -0.667089939 -3.690280199 0.924510121  
H -2.027236462 -3.079677343 1.954628706  
H -0.478367388 -1.880258679 1.845705032  
Cu -0.729433119 -0.968923450 0.518255353

=====  
**I<sub>p</sub>-TS'**  
=====

P 1.185198307 -0.424962431 -1.073373079  
C 0.797197998 1.354812980 -1.501539111  
C -0.011506124 2.127758026 -0.443621457  
P -1.348679066 1.113659859 0.378967226  
C -2.874931812 1.382080555 -0.708233416  
C -1.971038938 2.317908287 1.713612795  
C -3.439408302 2.742224216 -0.270489722  
C -3.395370483 2.746739626 1.262891293  
C 2.057437897 -0.953243673 -2.669571400  
C 2.813677549 -0.411183745 -0.085570447  
C 3.390743256 -1.569081545 -2.186358929  
C 3.941950798 -0.625474155 -1.110392451  
C -1.906977534 1.740195155 3.108465672  
C -1.117212296 2.335568428 4.097929478  
C -2.628216267 0.582587302 3.440536976  
C -1.040422678 1.788556695 5.381986618  
C -2.555493116 0.033388302 4.719076633  
C -1.756801128 0.633587122 5.696874142  
C -2.569633722 1.140166640 -2.166305780  
C -2.436283350 2.178920269 -3.095220327  
C -2.328611851 -0.178238794 -2.593232870  
C -2.060921431 1.908249855 -4.415023327  
C -1.948219419 -0.448264748 -3.905252934  
C -1.808779836 0.598017216 -4.821413517



|    |              |              |              |   |              |              |              |
|----|--------------|--------------|--------------|---|--------------|--------------|--------------|
| C  | 2.896914959  | 0.766041815  | 0.855652273  | C | -1.911854506 | 2.520431995  | 1.755862117  |
| C  | 3.528342009  | 1.970542908  | 0.516128302  | C | -3.606600761 | 2.691668987  | -0.047993042 |
| C  | 2.233256340  | 0.686680198  | 2.092017651  | C | -3.429316282 | 2.669395924  | 1.475649595  |
| C  | 3.494009256  | 3.065114260  | 1.383844614  | C | 1.654500484  | -1.131092310 | -2.680214882 |
| C  | 2.195909739  | 1.778553724  | 2.957197428  | C | 2.588938713  | -0.662787914 | -0.141406313 |
| C  | 2.825294018  | 2.975674868  | 2.605432034  | C | 3.072501898  | -1.660614967 | -2.320504904 |
| C  | 1.278558969  | -1.811206937 | -3.632595539 | C | 3.662221909  | -0.743506908 | -1.237468243 |
| C  | 1.274266601  | -1.479118943 | -4.994022846 | C | -1.567596674 | 2.181079388  | 3.184930086  |
| C  | 0.587581575  | -2.957089186 | -3.217345953 | C | -0.938568890 | 3.115675449  | 4.014574528  |
| C  | 0.604687572  | -2.273246050 | -5.924841881 | C | -1.887233138 | 0.921800673  | 3.712377310  |
| C  | -0.081343882 | -3.754667997 | -4.145567894 | C | -0.635753453 | 2.803249598  | 5.342014313  |
| C  | -0.074094154 | -3.416410923 | -5.500983715 | C | -1.584511280 | 0.605036080  | 5.034735680  |
| H  | 0.228911564  | 1.289191842  | -2.435580015 | C | -0.956008494 | 1.545990348  | 5.856313229  |
| H  | 1.729727149  | 1.888906360  | -1.717090130 | C | -2.572420835 | 1.337898612  | -2.053580046 |
| H  | 0.648554742  | 2.439697742  | 0.372550100  | C | -2.413803101 | 0.058880728  | -2.612802267 |
| H  | -0.437949091 | 3.033641815  | -0.890920222 | C | -2.332311630 | 2.453187466  | -2.866076469 |
| H  | -3.568656921 | 0.601047456  | -0.367943794 | C | -2.013480425 | -0.105276451 | -3.936786175 |
| H  | -1.311116099 | 3.191509008  | 1.659184694  | C | -1.932057261 | 2.292665720  | -4.195753098 |
| H  | -4.453370094 | 2.901357412  | -0.655556917 | C | -1.764451265 | 1.015829325  | -4.733891964 |
| H  | -2.817382336 | 3.559513330  | -0.656152189 | C | 2.706968069  | 0.333054811  | 0.984419703  |
| H  | -4.131196022 | 2.030953169  | 1.648762941  | C | 3.512263060  | 1.474304318  | 0.914833426  |
| H  | -3.652612686 | 3.723258734  | 1.687626004  | C | 1.889072537  | 0.155931935  | 2.114932537  |
| H  | 2.305040121  | -0.010585520 | -3.175612926 | C | 3.488056660  | 2.422492743  | 1.943243146  |
| H  | 2.719893217  | -1.321566224 | 0.516355693  | C | 1.850139499  | 1.105361223  | 3.131311178  |
| H  | 4.079201698  | -1.694019556 | -3.029578447 | C | 2.652062893  | 2.247284174  | 3.045816183  |
| H  | 3.207729340  | -2.567709684 | -1.768316984 | C | 0.772841930  | -2.148350239 | -3.375211239 |
| H  | 4.224077702  | 0.321851969  | -1.586194754 | C | 0.749440849  | -2.194760084 | -4.775227547 |
| H  | 4.841596127  | -1.019976020 | -0.624512136 | C | -0.017353158 | -3.063182354 | -2.662206650 |
| H  | -0.547969699 | 3.230316401  | 3.857574940  | C | -0.049318045 | -3.118698835 | -5.450636864 |
| H  | -3.240766764 | 0.095811605  | 2.684997320  | C | -0.821727276 | -3.983140707 | -3.335339308 |
| H  | -0.419836581 | 2.266689301  | 6.135437965  | C | -0.843719542 | -4.013187408 | -4.731555939 |
| H  | -3.117152691 | -0.867499530 | 4.951292992  | H | 0.252480447  | 1.420314431  | -2.388086796 |
| H  | -1.695456743 | 0.204589099  | 6.692958355  | H | 1.796507955  | 1.821602345  | -1.621208429 |
| H  | -2.626056194 | 3.205849648  | -2.797912121 | H | 0.737406492  | 2.438714266  | 0.456225783  |
| H  | -2.402847052 | -0.994014084 | -1.879930377 | H | -0.323254675 | 3.118840218  | -0.788530529 |
| H  | -1.964105844 | 2.727521420  | -5.123010159 | H | -3.488070726 | 0.565451801  | -0.299930096 |
| H  | -1.743741512 | -1.470937610 | -4.205173969 | H | -1.424553633 | 3.466641903  | 1.487233162  |
| H  | -1.501784921 | 0.387001842  | -5.841746330 | H | -4.661882401 | 2.691176176  | -0.343291163 |
| H  | 4.051259041  | 2.066295862  | -0.430757344 | H | -3.155660629 | 3.607796192  | -0.449389398 |
| H  | 1.704455853  | -0.228597045 | 2.345504999  | H | -3.966052771 | 1.810517788  | 1.897929788  |
| H  | 3.991312027  | 3.989436150  | 1.101249814  | H | -3.819672346 | 3.571055889  | 1.960698366  |
| H  | 1.663235307  | 1.692667365  | 3.899496794  | H | 1.774621010  | -0.267690927 | -3.346472502 |
| H  | 2.799335957  | 3.828587770  | 3.278611422  | H | 2.486370564  | -1.663622379 | 0.298479795  |
| H  | 1.798385978  | -0.585417628 | -5.325845718 | H | 3.699627161  | -1.713416457 | -3.217187643 |
| H  | 0.539635718  | -3.217499495 | -2.163173914 | H | 2.984271765  | -2.682841301 | -1.930945635 |
| H  | 0.610260904  | -1.996281147 | -6.976006508 | H | 3.859466314  | 0.248999327  | -1.663172245 |
| H  | -0.626890123 | -4.624724865 | -3.798914194 | H | 4.612651348  | -1.123850703 | -0.844847023 |
| H  | -0.603116751 | -4.036370754 | -6.219809532 | H | -0.676268697 | 4.093328953  | 3.616654634  |
| C  | -2.200840473 | -3.588407993 | -0.438658327 | H | -2.362488747 | 0.184397414  | 3.074281216  |
| C  | -3.215201855 | -3.682168484 | -1.420359135 | H | -0.144841939 | 3.540429592  | 5.971778870  |
| H  | -3.981102705 | -2.909818172 | -1.456179500 | H | -1.833017588 | -0.380107999 | 5.420623302  |
| C  | -3.274751186 | -4.749666214 | -2.310224056 | H | -0.716620922 | 1.299245834  | 6.886925697  |
| H  | -4.079711437 | -4.790281296 | -3.040550232 | H | -2.600014448 | -0.811341882 | -1.991603613 |
| C  | -2.320292473 | -5.771991253 | -2.265838861 | H | -2.451467991 | 3.455757618  | -2.466279268 |
| H  | -2.374868393 | -6.613821507 | -2.950197697 | H | -1.885958672 | -1.105477095 | -4.339748859 |
| H  | -0.521183372 | -6.451894283 | -1.286501646 | H | -1.748574853 | 3.170561075  | -4.810101509 |
| C  | -1.286783576 | -5.679893970 | -1.326351404 | H | -1.447573185 | 0.893711984  | -5.766164780 |
| C  | -1.217442274 | -4.608014584 | -0.440194398 | H | 4.161439419  | 1.631759882  | 0.058474962  |
| H  | -0.396222115 | -4.559708118 | 0.270025551  | H | 1.251762748  | -0.724992812 | 2.177683592  |
| C  | -2.229661703 | -2.516191483 | 0.544026315  | H | 4.123006344  | 3.302130938  | 1.875413299  |
| C  | -1.450174332 | -2.508802652 | 1.730852962  | H | 1.186270952  | 0.963388383  | 3.978158236  |
| H  | -0.948181391 | -3.423552513 | 2.026642561  | H | 2.620508432  | 2.992174625  | 3.835713863  |
| H  | -1.796957970 | -1.914601207 | 2.569258451  | H | 1.351897478  | -1.487812161 | -5.341830254 |
| H  | 0.075009070  | -1.756407976 | 1.780537009  | H | -0.043089125 | -3.027611971 | -1.575704336 |
| Cu | -0.475045919 | -1.092005014 | 0.391974896  | H | -0.059207018 | -3.131318092 | -6.537333965 |
| H  | -3.059563160 | -1.815868735 | 0.477184892  | H | -1.441016912 | -4.669454098 | -2.764029741 |

---

**IIp**

---

|   |              |              |              |
|---|--------------|--------------|--------------|
| P | 0.957749784  | -0.444071054 | -1.065972209 |
| C | 0.807801366  | 1.381166220  | -1.444361448 |
| C | 0.053313896  | 2.181992531  | -0.361726642 |
| P | -1.330806494 | 1.243005514  | 0.485353798  |
| C | -2.888874769 | 1.439738512  | -0.582453132 |

C -4.858283997 -1.976772308 -0.530347705  
 C -3.587952614 -2.464715242 -0.246026590  
 H -3.001152515 -2.935017824 -1.034262538  
 C -1.585732460 -2.709761858 1.254838347  
 H -1.335234165 -3.587879896 0.645935357  
 C -1.142637134 -2.919151783 2.703301668  
 H -0.112352684 -3.292201281 2.733087301  
 H -1.771589756 -3.643414736 3.250778437  
 H -1.152652502 -1.986602664 3.281607151  
 Cu -0.732225180 -1.081050515 0.402343661

II<sub>P</sub>-TS

P 1.103844881 -0.551119626 -0.920286000  
 C 0.809843063 1.219982028 -1.427813292  
 C -0.042985912 2.021294832 -0.426197857  
 P -1.436579943 1.070538402 0.389230192  
 C -2.923747778 1.265219092 -0.793227673  
 C -2.081053019 2.421049595 1.564320087  
 C -3.701992750 2.500977278 -0.298148483  
 C -3.585206509 2.552879572 1.229121566  
 C 1.966903925 -1.246724010 -2.453480721  
 C 2.712773323 -0.519997120 0.096307859  
 C 3.272084475 -1.871762395 -1.901189208  
 C 3.844395638 -0.867777467 -0.892219961  
 C -1.775415421 2.245911360 3.031635046  
 C -1.077181458 3.240730047 3.729698658  
 C -2.218675852 1.119990349 3.740315676  
 C -0.842819810 3.125680685 5.101836205  
 C -1.995634794 1.005900860 5.110944271  
 C -1.307014346 2.009107828 5.799085617  
 C -2.556046724 1.222086906 -2.263668060  
 C -2.029842854 0.030895060 -2.798766136  
 C -2.713938475 2.317924738 -3.123740196  
 C -1.682219148 -0.064092368 -4.143897057  
 C -2.364959240 2.226351976 -4.476495266  
 C -1.848438859 1.038505197 -4.991942406  
 C 2.846816063 0.737754703 0.926152349  
 C 3.606067181 1.844861031 0.523541689  
 C 2.117446899 0.831998229 2.123823881  
 C 3.632039785 3.011754990 1.293375611  
 C 2.143864393 1.992070079 2.894173861  
 C 2.899929047 3.091848373 2.478908062  
 C 1.143712878 -2.176046848 -3.316731691  
 C 1.283728838 -2.132966757 -4.711312771  
 C 0.257721514 -3.112054110 -2.763527393  
 C 0.554240882 -2.992397785 -5.534509659  
 C -0.473578513 -3.972278595 -3.583366394  
 C -0.331860989 -3.913563013 -4.972582340  
 H 0.296441317 1.157246351 -2.391498804  
 H 1.767968655 1.727137327 -1.587427855  
 H 0.583525419 2.365190506 0.404229045  
 H -0.459484547 2.907772541 -0.919663966  
 H -3.522154808 0.370229214 -0.601464093  
 H -1.596987247 3.345136404 1.222277403  
 H -4.743401051 2.468720198 -0.640839040  
 H -3.258834839 3.419027090 -0.703030765  
 H -4.148931980 1.736649632 1.695132971  
 H -3.984894514 3.485689640 1.644395471  
 H 2.252301931 -0.375850588 -3.058762789  
 H 2.589146614 -1.359082580 0.786860049  
 H 3.968760014 -2.089758158 -2.719130754  
 H 3.044353485 -2.826025724 -1.409055829  
 H 4.172829628 0.025173588 -1.437962174  
 H 4.719375610 -1.258625150 -0.359771401  
 H -0.714239776 4.114939213 3.192972660  
 H -2.733885527 0.321265042 3.217936754  
 H -0.300977319 3.910542488 5.624849319  
 H -2.350431919 0.123590738 5.638038158  
 H -1.130487323 1.919523716 6.867793083  
 H -1.894319773 -0.826234579 -2.148354530  
 H -3.133660316 3.249888182 -2.756586790  
 H -1.275476933 -0.996277988 -4.526420593  
 H -2.504780531 3.089745760 -5.125729084

H -1.580652714 0.968355417 -6.043954849  
 H 4.187530041 1.808219790 -0.393355250  
 H 1.515194654 -0.006572132 2.450727940  
 H 4.228230000 3.858749390 0.962007165  
 H 1.564138889 2.032103777 3.811467409  
 H 2.921802759 4.000557423 3.075691223  
 H 1.964617372 -1.410146713 -5.156672478  
 H 0.129812583 -3.147850752 -1.686486006  
 H 0.672047615 -2.936327219 -6.614191055  
 H -1.160575151 -4.690412521 -3.141945839  
 H -0.909337580 -4.578061581 -5.609445572  
 C 0.753543079 -2.408727169 2.840760708  
 C 2.146303177 -2.594014168 3.002772093  
 H 2.700435400 -3.179189444 2.274913549  
 C 2.832738638 -2.046602249 4.088023663  
 H 3.906316996 -2.200195313 4.173219681  
 C 2.156422853 -1.309037566 5.059016705  
 H 2.693520546 -0.875876725 5.898421288  
 H 0.229018360 -0.549322963 5.671254635  
 C 0.772233307 -1.130192876 4.931353092  
 C 0.088761158 -1.666986346 3.848188400  
 H -0.979594946 -1.497192264 3.737814665  
 C -0.007685808 -2.943797112 1.700469732  
 H -0.971015513 -3.329029560 2.044076920  
 C 0.723395288 -3.975155830 0.851468265  
 H 0.041798435 -4.449967861 0.143111631  
 H 1.171106935 -4.778558254 1.460203767  
 H 1.542493582 -3.534133196 0.268390685  
 Cu -0.725167632 -1.326729536 0.540212214  
 C -5.952045918 -1.241797447 -4.915658951  
 C -6.991589546 -0.334590286 -4.672555923  
 H -5.634367466 -1.425751328 -5.941768169  
 C -5.299565315 -1.910453081 -3.873319387  
 C -7.384693146 -0.105420895 -3.346808434  
 C -5.725405693 -1.664438367 -2.555075884  
 H -8.188065529 0.603309453 -3.143388271  
 C -6.766928673 -0.758019388 -2.275930405  
 C -5.021512985 -2.328967810 -1.394168854  
 O -5.493176460 -3.195450544 -0.684071779  
 O -3.826641083 -1.753080964 -1.280867815  
 N -2.717458725 -2.301947832 0.012011468  
 C -4.117750168 -3.845529318 2.989281416  
 C -3.494663954 -3.614560366 1.764106512  
 C -4.747206688 -2.772894144 3.632272482  
 H -4.127864361 -4.838599205 3.429824829  
 C -3.462435484 -2.308507442 1.233429909  
 C -2.836949348 -4.464625359 0.784260690  
 C -4.763268948 -1.494652152 3.058280468  
 H -5.245748043 -2.937548876 4.583748817  
 C -4.115066051 -1.250036955 1.842341542  
 C -2.445827484 -3.670674324 -0.243339583  
 H -2.677375555 -5.531202316 0.869289160  
 H -5.278491497 -0.681523502 3.562234640  
 H -4.138068676 -0.274289340 1.376296520  
 H -1.952995777 -3.920182943 -1.168293118  
 C -4.160928249 -2.868594885 -4.151439190  
 H -4.058751106 -3.061385870 -5.225138664  
 H -3.210872173 -2.465501070 -3.783887148  
 H -4.322182178 -3.829214811 -3.645645142  
 C -7.178904533 -0.484284014 -0.845524848  
 H -7.406509876 -1.415145993 -0.317220092  
 H -6.362290859 -0.004453958 -0.288797110  
 H -8.051867485 0.174826816 -0.799524844  
 C -7.697853088 0.366419196 -5.812599182  
 H -7.980410576 1.389838934 -5.539261818  
 H -7.068243027 0.414823234 -6.708278179  
 H -8.621408463 -0.160439417 -6.088278770

III<sub>PN</sub>

P 0.983174503 0.066894881 -1.010012031  
 C 0.796702564 1.870543957 -1.427083135  
 C 0.057451498 2.712017298 -0.376180440  
 P -1.407168865 1.848778248 0.381542176

C -2.942531347 2.131369591 -0.685792148  
C -1.966758013 3.101046562 1.695140839  
C -3.558436394 3.452449560 -0.179618344  
C -3.444499493 3.407343864 1.346781850  
C 1.831754923 -0.615839958 -2.575275421  
C 2.528407335 -0.128276095 0.047822814  
C 3.229708195 -1.080096126 -2.097345114  
C 3.683355093 -0.146798790 -0.967311919  
C -1.730788589 2.747601748 3.144205332  
C -1.014335513 3.626102924 3.966959953  
C -2.262780666 1.578885198 3.705388784  
C -0.829896033 3.346224546 5.321990490  
C -2.070731401 1.291613579 5.056194305  
C -1.354361057 2.173901796 5.869708538  
C -2.752843618 1.952340961 -2.168465614  
C -3.145376205 0.745662093 -2.768989086  
C -2.201108932 2.953434706 -2.982048273  
C -3.000976801 0.545509398 -4.141016960  
C -2.047277212 2.751448393 -4.354629993  
C -2.449035168 1.547451973 -4.940495968  
C 2.545610428 0.828242183 1.213089824  
C 3.328146458 1.985978842 1.236718178  
C 1.669756532 0.582424998 2.282671213  
C 3.234302282 2.875015497 2.313141823  
C 1.557029963 1.473163366 3.344624996  
C 2.347136259 2.626647234 3.360104084  
C 1.028935671 -1.589053512 -3.412684441  
C 0.121591695 -1.085995436 -4.357687950  
C 1.158368945 -2.980101347 -3.289020777  
C -0.626310289 -1.946740508 -5.161497116  
C 0.404468507 -3.842751026 -4.087179661  
C -0.486453086 -3.330452681 -5.030911446  
H 0.239048988 1.881260514 -2.371137381  
H 1.792903066 2.282433987 -1.626901984  
H 0.719175160 2.918834925 0.472661763  
H -0.229854420 3.676869154 -0.808552444  
H -3.597450018 1.329136610 -0.333772331  
H -1.386160374 4.000965595 1.452283740  
H -4.596349239 3.540634871 -0.517721474  
H -3.012667418 4.318464279 -0.574052572  
H -4.090929031 2.618939638 1.751088619  
H -3.745272875 4.346571445 1.822157860  
H 1.978106380 0.291774362 -3.174139261  
H 2.430729866 -1.148236275 0.445195764  
H 3.925558090 -1.087639451 -2.942005873  
H 3.184843063 -2.104842424 -1.711221457  
H 3.874753952 0.858987451 -1.361110926  
H 4.609283924 -0.490481406 -0.494608104  
H -0.600805998 4.539612293 3.545598030  
H -2.820428848 0.883353353 3.087123156  
H -0.279095203 4.042835236 5.948194981  
H -2.477504492 0.372042686 5.465214252  
H -1.210878849 1.952316165 6.923528194  
H -3.579354525 -0.043428641 -2.160033941  
H -1.906979322 3.904922247 -2.547215462  
H -3.327337265 -0.391555697 -4.583248138  
H -1.626769543 3.541440248 -4.970646381  
H -2.345854044 1.400788665 -6.011744976  
H 4.020982265 2.198601723 0.428044438  
H 1.063660502 -0.319899887 2.270899296  
H 3.857800484 3.764499426 2.328013659  
H 0.848644733 1.282132030 4.144810677  
H 2.264349461 3.325039387 4.186709881  
H -0.005855107 -0.011652543 -4.467798710  
H 1.860600710 -3.406928778 -2.579006195  
H -1.313143969 -1.533849478 -5.894520760  
H 0.520287037 -4.916980743 -3.974545240  
H -1.067597747 -4.002424240 -5.655584335  
C -1.929189324 -3.131617785 -0.611185551  
C -2.804902554 -3.861186028 0.228495002  
H -2.514121771 -4.090060234 1.247697353  
C -4.036954880 -4.289593220 -0.248682231  
H -4.695981026 -4.855799675 0.402039170  
C -4.439720631 -3.970047951 -1.550429463  
H -5.408039093 -4.301878452 -1.913738489

H -3.917896986 -2.958341360 -3.388593674  
C -3.604119778 -3.208842278 -2.379120111  
C -2.361727238 -2.795335531 -1.919440866  
H -1.701517820 -2.225298643 -2.566555023  
C -0.586726725 -2.780105591 -0.217686504  
H 0.043876518 -2.560605526 -1.071730375  
C 0.143957868 -3.453031301 0.907142997  
H 1.048852563 -2.900303841 1.177736402  
H 0.462549865 -4.448133945 0.563187718  
H -0.461083740 -3.577256441 1.804071426  
Cu -0.828988433 -0.617154062 0.313834548  
C -4.973044395 -2.051231384 3.361621380  
C -3.605219841 -1.871226788 3.110443592  
C -5.895650387 -1.712918162 2.372203588  
H -5.310966015 -2.440732241 4.318548679  
C -3.194648981 -1.305702925 1.864266157  
C -2.397339344 -2.090475798 3.860192060  
C -5.476555824 -1.196351290 1.130074143  
H -6.956729412 -1.849614859 2.560549974  
C -4.126187801 -0.987141073 0.867366493  
N -1.830148339 -1.143007159 1.863090158  
C -1.364318252 -1.650536895 3.061923265  
H -2.313004255 -2.471157789 4.869081497  
H -3.788527012 -0.641086519 -0.103392601  
H -6.215812683 -0.963352859 0.369031787  
H -0.309218973 -1.623524904 3.296107769

=====  
**III<sub>PN</sub>-TS**  
=====

P 3.197735071 -0.068751089 -3.134894371  
C 3.017554045 1.778029561 -3.363404036  
C 2.520188570 2.541461706 -2.127539158  
P 0.949032307 1.897422552 -1.338191271  
C -0.472845376 2.838901758 -2.171835184  
C 0.915458977 3.076995134 0.174447462  
C -0.374555230 4.276543140 -1.618167877  
C -0.188990951 4.137374401 -0.105527721  
C 3.753736496 -0.528429508 -4.875885010  
C 4.928739548 -0.339640945 -2.396540880  
C 5.231670380 -0.042376943 -4.910815716  
C 5.925018787 -0.440993488 -3.593369961  
C 0.791501582 2.407772064 1.523298502  
C 1.881600261 2.392015219 2.403725863  
C -0.409240603 1.806075335 1.935132027  
C 1.781094432 1.787572026 3.659316778  
C -0.515484035 1.205541492 3.190844774  
C 0.581581771 1.194351673 4.058586597  
C -0.627148271 2.713750124 -3.667953968  
C 0.230479449 3.378229141 -4.561635494  
C -1.678862929 1.952609777 -4.202763081  
C 0.064537838 3.252747059 -5.942287922  
C -1.853877783 1.830017209 -5.584083080  
C -0.975081086 2.472503901 -6.460197926  
C 5.238903999 0.665966809 -1.310856938  
C 5.882635593 1.884174347 -1.571018696  
C 4.809682846 0.400957882 -0.001237109  
C 6.085462093 2.814845085 -0.550248742  
C 5.012584686 1.328628659 1.018879414  
C 5.648784637 2.542539835 0.747958839  
C 3.610143900 -1.986737132 -5.261575699  
C 3.070668697 -2.303317070 -6.516522408  
C 4.063865185 -3.040624380 -4.453058243  
C 2.984829187 -3.625777245 -6.953559875  
C 3.974921942 -4.364533424 -4.884073734  
C 3.435253620 -4.664292336 -6.136290073  
H 2.310526133 1.892867923 -4.191904545  
H 3.970800638 2.209598541 -3.684058189  
H 3.269348145 2.482522249 -1.332383633  
H 2.409428596 3.604881525 -2.367702723  
H -1.359012246 2.380341768 -1.705964446  
H 1.889748096 3.577941656 0.132186309  
H -1.275590420 4.846120834 -1.872033238  
H 0.473682225 4.807621479 -2.068301916  
H -1.137203455 3.813546896 0.341567874

|    |              |              |              |   |              |              |              |
|----|--------------|--------------|--------------|---|--------------|--------------|--------------|
| H  | 0.076267794  | 5.086528301  | 0.375084460  | C | 3.722846746  | -0.075934954 | -1.097292423 |
| H  | 3.152173519  | 0.069841281  | -5.568537235 | C | -1.850572824 | 2.803468227  | 3.255721569  |
| H  | 4.843106270  | -1.317154288 | -1.910831571 | C | -1.025793910 | 3.247446299  | 4.297104359  |
| H  | 5.247726917  | 1.046402454  | -5.032804489 | C | -2.841872692 | 1.853175998  | 3.542096615  |
| H  | 5.747873306  | -0.464504600 | -5.779380322 | C | -1.185577154 | 2.755650997  | 5.595186234  |
| H  | 6.811876774  | 0.173649475  | -3.419874430 | C | -3.008177280 | 1.365383029  | 4.837487698  |
| H  | 6.280039787  | -1.472676039 | -3.667353630 | C | -2.178968668 | 1.813132048  | 5.869916439  |
| H  | 2.818558216  | 2.851485729  | 2.098466635  | C | -2.539690256 | 2.614307642  | -2.113496780 |
| H  | -1.270935535 | 1.8051702567 | 1.270320654  | C | -3.151541948 | 1.523896575  | -2.750464916 |
| H  | 2.638803482  | 1.785922527  | 4.327514172  | C | -1.777349353 | 3.496329069  | -2.894356966 |
| H  | -1.454241395 | 0.748169363  | 3.494076014  | C | -3.004419088 | 1.317985773  | -4.123268604 |
| H  | 0.499544472  | 0.728010714  | 5.036915779  | C | -1.613469124 | 3.280679941  | -4.264539719 |
| H  | 1.027485013  | 4.011856079  | -4.179701328 | C | -2.222193241 | 2.187784195  | -4.886310101 |
| H  | -2.380982637 | 1.461296558  | -3.529736996 | C | 2.747959852  | 0.883385718  | 1.182442904  |
| H  | 0.739901781  | 3.777044773  | -6.614924908 | C | 3.563183546  | 2.018889189  | 1.188764095  |
| H  | -2.683856249 | 1.242942929  | -5.973361969 | C | 1.891942859  | 0.662071764  | 2.276382685  |
| H  | -1.109830141 | 2.382169962  | -7.535153866 | C | 3.514932394  | 2.917663813  | 2.259941101  |
| H  | 6.227625847  | 2.115917921  | -2.575146914 | C | 1.832925320  | 1.560282350  | 3.338382244  |
| H  | 4.309054375  | -0.536474228 | 0.218165591  | C | 2.646998882  | 2.697514772  | 3.329697847  |
| H  | 6.590634823  | 3.751305103  | -0.769749820 | C | 0.755848229  | -1.581438780 | -3.106794596 |
| H  | 4.674236298  | 1.096157312  | 2.024231195  | C | -0.534186244 | -1.158839822 | -3.474421263 |
| H  | 5.816242695  | 3.264086723  | 1.542579770  | C | 1.079713702  | -2.932517767 | -3.272018671 |
| H  | 2.727311850  | -1.501525402 | -7.166528702 | C | -1.470969915 | -2.057805777 | -3.979175568 |
| H  | 4.496489525  | -2.841612577 | -3.479261398 | C | 0.139206052  | -3.838275433 | -3.776278019 |
| H  | 2.573871613  | -3.843531132 | -7.935592651 | C | -1.139241099 | -3.408643007 | -4.130026340 |
| H  | 4.337574959  | -5.162523746 | -4.241412640 | H | 0.395018756  | 2.092912674  | -2.221432686 |
| H  | 3.377527237  | -5.694143772 | -6.476298332 | H | 1.958870649  | 2.413753510  | -1.469081402 |
| C  | -0.117906235 | -2.278073788 | -2.063459873 | H | 0.911545157  | 2.934634686  | 0.685628474  |
| C  | -0.581720710 | -1.255855918 | -2.939964056 | H | 0.092911728  | 3.874194860  | -0.559088707 |
| H  | -1.040073514 | -0.356552243 | -2.544115305 | H | -3.586742640 | 2.194884777  | -0.315285921 |
| C  | -0.491208166 | -1.424091101 | -4.321103573 | H | -0.859559178 | 4.075040340  | 1.858819604  |
| H  | -0.843129992 | -0.633203268 | -4.974819660 | H | -3.914453030 | 4.635934830  | -0.523311734 |
| C  | 0.058263026  | -2.591902256 | -4.852729321 | H | -2.175189972 | 4.914889812  | -0.467389047 |
| H  | 0.143709987  | -2.711723804 | -5.927968979 | H | -3.874819279 | 3.637277126  | 1.739603043  |
| H  | 0.944024444  | -4.511980534 | -4.430850029 | H | -2.996962309 | 5.156723022  | 1.874323368  |
| C  | 0.507194221  | -3.613497257 | -4.007388115 | H | 1.765707374  | 0.295079172  | -3.226794004 |
| C  | 0.420147121  | -3.463522673 | -2.631480694 | H | 2.584011078  | -1.087560415 | 0.407198399  |
| H  | 0.765106618  | -4.252065659 | -1.971525431 | H | 3.780994415  | -1.009051204 | -3.091254234 |
| C  | -0.138974607 | -2.148935080 | -0.608791649 | H | 3.146390676  | -2.023283005 | -1.798835516 |
| H  | 0.120183542  | -3.057257175 | -0.077558286 | H | 3.881879568  | 0.933164716  | -1.496840715 |
| C  | -1.113076210 | -1.258456469 | 0.095276855  | H | 4.688830376  | -0.432088941 | -0.723641336 |
| H  | -0.831881166 | -1.104002953 | 1.137684822  | H | -0.254567325 | 3.987107038  | 4.091211796  |
| H  | -2.089194298 | -1.769181371 | 0.079910651  | H | -3.489389896 | 1.491080523  | 2.747841835  |
| H  | -1.230144382 | -0.284760296 | -0.386313647 | H | -0.541326702 | 3.117179394  | 6.392757416  |
| Cu | 1.477749228  | -0.601887882 | -1.585961342 | H | -3.792359591 | 0.640380383  | 5.045233727  |
| C  | 3.841084957  | -4.087189198 | 1.747828484  | H | -2.311781168 | 1.436866760  | 6.880601883  |
| C  | 2.988051176  | -3.008628368 | 1.485729575  | H | -3.757946968 | 0.841525555  | -2.161133528 |
| C  | 4.321246147  | -4.842971325 | 0.674764454  | H | -1.313419223 | 4.366524220  | -2.439043045 |
| H  | 4.138567448  | -4.324272156 | 2.766476870  | H | -3.508316517 | 0.481347203  | -4.600025177 |
| C  | 2.651325703  | -2.693127632 | 0.142193332  | H | -1.019589186 | 3.977784872  | -4.849387646 |
| C  | 2.349766731  | -2.000058174 | 2.302323580  | H | -2.104375362 | 2.028197527  | -5.953893661 |
| C  | 3.143073797  | -3.437213421 | -0.931871712 | H | 4.242033005  | 2.208369255  | 0.362916231  |
| N  | 1.857664824  | -1.537335396 | 0.120356061  | H | 1.255197287  | -0.221803710 | 2.283570290  |
| C  | 3.976083994  | -4.523735523 | -0.649760902 | H | 4.159809113  | 3.791831732  | 2.254686594  |
| H  | 2.895674467  | -3.164934874 | -1.951511025 | H | 1.149758816  | 1.382576466  | 4.162990570  |
| H  | 4.370973110  | -5.122414589 | -1.467489958 | H | 2.610577822  | 3.400178432  | 4.157214165  |
| H  | 4.984252453  | -5.682587147 | 0.865587771  | H | -0.810237586 | -0.112090491 | -3.373618126 |
| C  | 1.693325520  | -1.152326107 | 1.450749755  | H | 2.070610285  | -3.295722485 | -3.020270348 |
| H  | 2.428666592  | -1.887862325 | 3.376046419  | H | -2.456800222 | -1.700538754 | -4.263504505 |
| H  | 1.143962145  | -0.255300969 | 1.684127212  | H | 0.414438874  | -4.882032394 | -3.897168636 |

V<sub>PN</sub>

|   |              |              |              |   |              |              |              |
|---|--------------|--------------|--------------|---|--------------|--------------|--------------|
| P | 1.049706697  | 0.186113015  | -0.917251050 | C | -3.357039928 | -6.056283474 | 1.215469360  |
| C | 0.954391241  | 2.016636133  | -1.283021331 | H | -3.543682337 | -6.568872452 | 2.154839039  |
| C | 0.260570347  | 2.855979443  | -0.191208318 | C | -4.030399323 | -6.452294827 | 0.057074677  |
| P | -1.341428161 | 2.150942802  | 0.476350993  | H | -4.741406918 | -7.272386551 | 0.091630638  |
| C | -2.729095459 | 2.805993795  | -0.627530873 | H | -4.301168919 | -6.084605217 | -2.049878597 |
| C | -1.714028716 | 3.387452364  | 1.869042039  | C | -3.782699585 | -5.785630226 | -1.143155575 |
| C | -2.972170830 | 4.243772507  | -0.125043660 | C | -2.875644922 | -4.725121021 | -1.181476593 |
| C | -2.976514339 | 4.168332577  | 1.403275013  | H | -2.690132856 | -4.205237865 | -2.115826130 |
| C | 1.712730408  | -0.550248325 | -2.528702736 | C | -1.246194839 | -3.137590408 | -0.079453513 |
| C | 2.659485340  | -0.065011308 | 0.012715833  | H | -1.244749665 | -2.721012592 | -1.090152860 |
| C | 3.157903671  | -1.000078201 | -2.191699266 | C | 0.194584027  | -3.503483534 | 0.275637358  |

|    |              |              |              |
|----|--------------|--------------|--------------|
| H  | 0.817704082  | -2.605906010 | 0.340698093  |
| H  | 0.594694316  | -4.144724846 | -0.512590766 |
| H  | 0.257269710  | -4.050594807 | 1.219704151  |
| Cu | -0.864674568 | -0.130741805 | 0.345434397  |
| C  | -4.933322906 | -0.730106413 | 1.960112453  |
| C  | -3.632887125 | -1.252535343 | 1.886196256  |
| C  | -5.658002853 | -0.574593961 | 0.782973826  |
| H  | -5.368360043 | -0.466731191 | 2.919870615  |
| C  | -3.088603258 | -1.571734190 | 0.621514618  |
| C  | -2.620134354 | -1.551925182 | 2.867907047  |
| C  | -5.109117031 | -0.935359895 | -0.463477790 |
| H  | -6.670456886 | -0.184017226 | 0.823511302  |
| C  | -3.814931393 | -1.440797210 | -0.564226151 |
| N  | -1.747299314 | -2.016631842 | 0.799230993  |
| C  | -1.530121922 | -2.028630257 | 2.209225893  |
| H  | -2.688179016 | -1.382835507 | 3.932157040  |
| H  | -3.386244535 | -1.717191339 | -1.521520615 |
| H  | -5.709110260 | -0.823990643 | -1.362005591 |
| H  | -0.579838276 | -2.364482403 | 2.594414234  |

---



---

**VI<sub>PN</sub>**

---



---

|   |              |              |              |
|---|--------------|--------------|--------------|
| P | 0.975587368  | 1.009310365  | -0.772716641 |
| C | -0.067777336 | 2.571760416  | -0.759829462 |
| C | -1.040576100 | 2.696483135  | 0.433103353  |
| P | -2.078584909 | 1.150253057  | 0.657747507  |
| C | -3.655894041 | 1.333695650  | -0.397812307 |
| C | -3.036032677 | 1.498440623  | 2.270557880  |
| C | -4.798842430 | 1.706375718  | 0.574826419  |
| C | -4.472481728 | 1.062675714  | 1.922228336  |
| C | 1.674346805  | 1.019961238  | -2.539255619 |
| C | 2.647775412  | 1.440887213  | 0.014740908  |
| C | 3.201688051  | 0.973264098  | -2.342070580 |
| C | 3.531272888  | 1.899616599  | -1.161902189 |
| C | -2.441203833 | 0.914129674  | 3.530251265  |
| C | -3.004876614 | -0.192430273 | 4.178992748  |
| C | -1.296870470 | 1.499389172  | 4.097185135  |
| C | -2.439417601 | -0.707752824 | 5.346111774  |
| C | -0.731570661 | 0.987561941  | 5.264258862  |
| C | -1.298914909 | -0.122681499 | 5.894062519  |
| C | -3.531072617 | 2.197080135  | -1.625079393 |
| C | -3.232413530 | 1.593585253  | -2.856518745 |
| C | -3.703070164 | 3.590730906  | -1.595797062 |
| C | -3.133298159 | 2.351675749  | -4.024064064 |
| C | -3.596993208 | 4.352361202  | -2.760551453 |
| C | -3.317823172 | 3.735540867  | -3.981967449 |
| C | 2.540268898  | 2.323751926  | 1.232163429  |
| C | 2.385585308  | 1.735013366  | 2.497638226  |
| C | 2.530735731  | 3.725065947  | 1.153480768  |
| C | 2.221990347  | 2.511909008  | 3.642585516  |
| C | 2.361011982  | 4.506530285  | 2.297657490  |
| C | 2.202961922  | 3.904850245  | 3.547869205  |
| C | 1.012098312  | -0.037778489 | -3.396868944 |
| C | -0.251130700 | 0.237121925  | -3.938565016 |
| C | 1.550023556  | -1.314617276 | -3.590437412 |
| C | -0.983918488 | -0.747563660 | -4.596314907 |
| C | 0.826303542  | -2.295464277 | -4.273369312 |
| C | -0.454800338 | -2.029077768 | -4.756086826 |
| H | -0.643912375 | 2.526814938  | -1.691593647 |
| H | 0.578624189  | 3.453897953  | -0.821345806 |
| H | -0.473058790 | 2.819077253  | 1.363570333  |
| H | -1.663204432 | 3.589085579  | 0.304247022  |
| H | -3.803987503 | 0.292934507  | -0.705277145 |
| H | -3.036456585 | 2.593437672  | 2.374428034  |
| H | -5.760357857 | 1.365926743  | 0.172726050  |
| H | -4.872092724 | 2.792638302  | 0.707057893  |
| H | -4.527901649 | -0.028352372 | 1.819436193  |
| H | -5.172904968 | 1.359029770  | 2.712552547  |
| H | 1.419862032  | 2.008695602  | -2.943704605 |
| H | 3.023831844  | 0.461093068  | 0.335491866  |
| H | 3.723036289  | 1.267302632  | -3.259516954 |
| H | 3.526420832  | -0.045294978 | -2.096601009 |
| H | 3.300762415  | 2.935332298  | -1.439449072 |
| H | 4.592372894  | 1.866482496  | -0.889411151 |

|    |              |              |              |
|----|--------------|--------------|--------------|
| H  | -3.892846346 | -0.666130543 | 3.773896933  |
| H  | -0.848909199 | 2.371806383  | 3.627413511  |
| H  | -2.894207716 | -1.570939183 | 5.824570179  |
| H  | 0.144605622  | 1.466420174  | 5.692821980  |
| H  | -0.861377180 | -0.521025121 | 6.805570126  |
| H  | -3.058296680 | 0.521887481  | -2.887322426 |
| H  | -3.933621168 | 4.089630604  | -0.658305883 |
| H  | -2.909626245 | 1.859402061  | -4.967542171 |
| H  | -3.739934683 | 5.429416180  | -2.713569880 |
| H  | -3.245676994 | 4.327486515  | -4.890766144 |
| H  | 2.396854401  | 0.653200090  | 2.588454485  |
| H  | 2.661418915  | 4.216773510  | 0.193806216  |
| H  | 2.115532160  | 2.024400949  | 4.607571602  |
| H  | 2.355629683  | 5.590082169  | 2.210514307  |
| H  | 2.072370291  | 4.513933659  | 4.437942505  |
| H  | -0.679795384 | 1.226789236  | -3.810793877 |
| H  | 2.527442455  | -1.562921405 | -3.189360619 |
| H  | -1.979339004 | -0.520829320 | -4.971162319 |
| H  | 1.258996725  | -3.283813953 | -4.409832478 |
| H  | -1.036051154 | -2.810210705 | -5.236023903 |
| C  | 2.870777130  | -2.912275553 | 1.009357452  |
| C  | 4.078169823  | -3.579956293 | 1.232300997  |
| H  | 4.547669411  | -3.551885366 | 2.210748672  |
| C  | 4.688727379  | -4.307092190 | 0.205764994  |
| H  | 5.624442101  | -4.825741768 | 0.398217887  |
| C  | 4.091926575  | -4.380122185 | -1.051216364 |
| H  | 4.556470871  | -4.959788799 | -1.844629407 |
| H  | 2.394987345  | -3.784805059 | -2.247484684 |
| C  | 2.884762526  | -3.713900089 | -1.282188296 |
| C  | 2.282021284  | -2.978924274 | -0.264536053 |
| H  | 1.323199511  | -2.498736858 | -0.450106591 |
| C  | 2.141297579  | -2.148577213 | 2.105287075  |
| H  | 2.078701735  | -1.110796690 | 1.757501960  |
| C  | 2.807457924  | -2.151004553 | 3.483876944  |
| H  | 2.212072849  | -1.544060826 | 4.172985077  |
| H  | 3.818907022  | -1.733651280 | 3.440709114  |
| H  | 2.860974312  | -3.166073084 | 3.889595747  |
| Cu | -0.475192487 | -0.580312669 | -0.132065922 |
| C  | -2.063858509 | -4.725974083 | 1.538606048  |
| C  | -1.231848240 | -3.624559879 | 1.802775025  |
| C  | -1.496228099 | -5.989228725 | 1.458848953  |
| H  | -3.127184391 | -4.572999477 | 1.382334113  |
| C  | 0.170990363  | -3.813314915 | 1.960966706  |
| C  | -1.493214846 | -2.225862503 | 1.956718683  |
| C  | -0.105894811 | -6.163710594 | 1.629570603  |
| H  | -2.122114182 | -6.851914883 | 1.248618364  |
| C  | 0.743844330  | -5.090445995 | 1.875196934  |
| N  | 0.735328257  | -2.566359520 | 2.205817699  |
| C  | -0.286546111 | -1.614968181 | 2.194777727  |
| H  | -2.450675249 | -1.743144870 | 1.867713690  |
| H  | 1.811400175  | -5.239517212 | 1.986032486  |
| H  | 0.316347063  | -7.162618160 | 1.558052182  |
| H  | -0.076380484 | -0.598904192 | 2.500316143  |
| O  | -1.216947556 | -1.883687496 | -1.408635139 |
| C  | -2.439799309 | -2.268329144 | -1.304416895 |
| O  | -3.278914690 | -1.831188321 | -0.486748099 |
| C  | -2.856299639 | -3.330842495 | -2.302872181 |
| C  | -2.018433571 | -4.437745094 | -2.560368776 |
| C  | -4.089554310 | -3.210658073 | -2.984359503 |
| C  | -2.433678389 | -5.401936531 | -3.489007473 |
| C  | -4.448167324 | -4.183638096 | -3.920536041 |
| C  | -3.636552334 | -5.291026115 | -4.187249184 |
| H  | -1.790814877 | -6.261153221 | -3.674077034 |
| H  | -5.392799854 | -4.078775883 | -4.452711105 |
| C  | -4.062681675 | -6.327089310 | -5.202188015 |
| H  | -3.347839594 | -7.154021263 | -5.259845257 |
| H  | -5.044222832 | -6.749113083 | -4.953002930 |
| H  | -4.149426937 | -5.889883041 | -6.205249310 |
| C  | -0.679970324 | -4.615363121 | -1.881724954 |
| H  | -0.748202562 | -4.509249687 | -0.797898293 |
| H  | -0.262258083 | -5.603807449 | -2.101123571 |
| H  | 0.014831884  | -3.846575260 | -2.224324226 |
| C  | -5.036062717 | -2.054630995 | -2.739373922 |
| H  | -5.911852360 | -2.124901056 | -3.392482519 |
| H  | -5.360750198 | -2.034920692 | -1.697242379 |

H -4.555844307 -1.088134050 -2.926415920

II<sub>p</sub>-TS'

P 1.552207589 -0.433497280 -0.347039580  
C 0.803309798 1.114454269 -1.103900790  
C -0.413246989 1.689554095 -0.359916091  
P -1.732558250 0.462177217 0.127420425  
C -2.993044853 0.584953010 -1.283405542  
C -2.783313751 1.533219576 1.280158162  
C -3.850874662 1.816473365 -0.948501706  
C -4.141287804 1.727272391 0.553770185  
C 3.046311140 -0.634564102 -1.534865975  
C 2.665996313 0.248764455 1.041304946  
C 4.300409794 -0.413844317 -0.662221134  
C 3.966033459 0.687271118 0.348897904  
C -2.917335510 1.117779493 2.731684446  
C -3.287245274 2.108104706 3.655644417  
C -2.699557781 -0.182210907 3.198663473  
C -3.430841684 1.810173750 5.008289814  
C -2.830334663 -0.482427537 4.554875851  
C -3.197477579 0.509025753 5.463389874  
C -2.338809729 0.496341139 -2.640368223  
C -1.802113295 -0.736021698 -3.051223278  
C -2.198143482 1.598429441 -3.492756844  
C -1.157067060 -0.870641172 -4.277210712  
C -1.545827508 1.469038725 -4.722750187  
C -1.023548961 0.237538517 -5.120234013  
C 1.961767077 1.237346292 1.938021541  
C 2.184928894 2.618555546 1.865039229  
C 1.001632214 0.758530200 2.846678495  
C 1.455304980 3.501287222 2.666934490  
C 0.281744242 1.636963964 3.653418779  
C 0.499995917 3.015324593 3.559444666  
C 2.976147175 -1.908006310 -2.346964598  
C 2.240452766 -1.902967572 -3.544569969  
C 3.560265064 -3.114610195 -1.932448149  
C 2.082707644 -3.064073801 -4.298612595  
C 3.409330845 -4.279600620 -2.689300299  
C 2.666675806 -4.261471748 -3.872558594  
H 0.518914819 0.822543502 -2.122245073  
H 1.565896988 1.898106694 -1.194422722  
H -0.090658374 2.148244619 0.577509940  
H -0.876209199 2.479232073 -0.964858532  
H -3.634119272 -0.294195771 -1.152063131  
H -2.273350239 2.504566431 1.266123414  
H -4.764430523 1.837254763 -1.552950382  
H -3.303220272 2.744328976 -1.157833695  
H -4.799998283 0.875475585 0.761832654  
H -4.648881912 2.619228363 0.936626852  
H 2.972990274 0.211550355 -2.229857206  
H 2.882881880 -0.647310972 1.636635900  
H 5.165882587 -0.165924370 -1.287624240  
H 4.555555820 -1.326739669 -0.111502595  
H 3.826379061 1.637923956 -0.181665435  
H 4.771040916 0.842143238 1.077731371  
H -3.451120615 3.126257181 3.306881428  
H -2.405833960 -0.973902941 2.519104958  
H -3.714695215 2.593870163 5.706271648  
H -2.649181128 -1.495078444 4.892431736  
H -3.297613144 0.264030516 6.516914368  
H -1.887423754 -1.593284249 -2.389307976  
H -2.608724594 2.563753605 -3.210309982  
H -0.754136384 -1.837346554 -4.567271233  
H -1.451126695 2.335479021 -5.372612000  
H -0.521916449 0.137965560 -6.078860760  
H 2.925835848 3.017037630 1.178926826  
H 0.816562414 -0.309126616 2.918729544  
H 1.637355566 4.570724487 2.591433287  
H -0.458177596 1.246367216 4.344375134  
H -0.071687490 3.700727463 4.179358006  
H 1.777111650 -0.976964891 -3.880061626  
H 4.131982803 -3.160454035 -1.008180737  
H 1.508028984 -3.035802603 -5.223772049

H 3.868977070 -5.204275608 -2.345876932  
H 2.545999050 -5.169302940 -4.457935810  
C 0.408840895 -3.187856674 2.267024279  
C 1.816830277 -3.045451641 2.305877924  
H 2.398613691 -3.254272223 1.412668705  
C 2.469108105 -2.645597219 3.472164631  
H 3.553382397 -2.551784039 3.472402573  
C 1.748127699 -2.368752718 4.637181759  
H 2.261749983 -2.054358721 5.541287899  
H -0.227583826 -2.309749603 5.521079540  
C 0.353571177 -2.507287264 4.624217987  
C -0.300663531 -2.912974358 3.467065334  
H -1.381442189 -3.032453537 3.465940952  
C -0.330547065 -3.582618952 1.057212710  
H -1.254238486 -4.103661537 1.310894370  
C 0.447841853 -4.275262356 -0.050849479  
H -0.221410096 -4.568386555 -0.864404082  
H 0.950850308 -5.189989090 0.305995077  
H 1.219347835 -3.633003712 -0.486955106  
Cu -0.844205499 -1.710446954 0.479010552  
N -4.768986225 -3.335892439 1.680386543  
C -2.980148315 -5.301344395 -0.791842520  
C -3.483404160 -4.263678551 -0.016624460  
C -3.243602037 -6.618695259 -0.385598898  
H -2.402424097 -5.103729248 -1.689900756  
C -4.284210205 -4.544749737 1.1123038374  
C -3.415002108 -2.808472395 -0.086557373  
C -4.017158031 -6.882583141 0.748252153  
H -2.846132517 -7.445823669 -0.967177629  
C -4.564873695 -5.840340137 1.513513327  
C -4.190054417 -2.325780153 0.952174544  
H -3.041283369 -2.249433041 -0.929583430  
H -4.207151890 -7.911986828 1.038844347  
H -5.175204277 -6.015313148 2.392491579  
H -4.398271561 -1.299417496 1.216659784  
O -3.829151392 -3.307559013 3.331943512  
C -4.474554539 -3.949291945 4.283363819  
O -5.581092834 -4.459529400 4.232806206  
C -3.596441507 -3.962373257 5.522679329  
C -3.947838783 -3.135340214 6.612766743  
C -2.430060387 -4.744177341 5.550232887  
C -3.087440968 -3.079918623 7.709363937  
C -1.604409695 -4.668272495 6.681559563  
C -1.901383996 -3.830389500 7.756261826  
H -3.342137575 -2.433793068 8.548764229  
H -0.691705167 -5.260409355 6.703454494  
C -2.077928066 -5.689436913 4.423100471  
H -0.997352600 -5.855182648 4.377315998  
H -2.565927744 -6.660230637 4.577355862  
H -2.401928425 -5.309556961 3.450954437  
C -5.220114231 -2.321148872 6.573089123  
H -6.086107731 -2.967698336 6.402627945  
H -5.365599155 -1.768750072 7.506530762  
H -5.195684910 -1.596133351 5.750495434  
C -0.976708174 -3.715149641 8.946225166  
H -0.681789517 -2.671850681 9.117812157  
H -1.465137124 -4.064379215 9.864324570  
H -0.063762590 -4.303373337 8.806899071

III<sub>pc</sub>

P 1.378480196 -0.534830689 -0.641304493  
C 0.974058568 1.063487411 -1.510998368  
C 0.131551474 2.043240786 -0.682939589  
P -1.331681132 1.257131457 0.168787867  
C -2.807703972 1.467210889 -0.988816202  
C -1.898325443 2.658337116 1.309994817  
C -3.142476082 2.968319416 -0.882003725  
C -3.145605803 3.297987700 0.617839813  
C 2.307425976 -1.478907943 -2.003890276  
C 2.945218325 -0.195214435 0.354979873  
C 3.690328836 -1.766030788 -1.382665634  
C 4.104898930 -0.510350108 -0.607340813  
C -2.151252508 2.207904339 2.731164932



|    |              |              |              |   |              |              |              |
|----|--------------|--------------|--------------|---|--------------|--------------|--------------|
| H  | -1.043189168 | 2.773304462  | 6.141343117  | C | -2.747416019 | 0.532437146  | -2.445883274 |
| H  | -4.115067959 | 0.118634947  | 4.716835022  | C | -1.753195643 | -2.067601442 | -2.225027084 |
| H  | -2.840515137 | 1.117541194  | 6.609410286  | C | -2.544870138 | -0.243716508 | -3.591583967 |
| H  | -3.932700396 | -0.937673390 | -1.492058635 | C | -2.040416241 | -1.539864898 | -3.487154484 |
| H  | -1.445040345 | 2.211089611  | -3.040952206 | C | 3.203216076  | 2.162671089  | 0.280505627  |
| H  | -3.915464640 | -2.040983200 | -3.696220875 | C | 3.305080652  | 3.486752272  | -0.157111004 |
| H  | -1.429293513 | 1.109569669  | -5.244942188 | C | 2.844514847  | 1.924797773  | 1.619245172  |
| H  | -2.657467604 | -1.023541212 | -5.592918396 | C | 3.037878752  | 4.545748711  | 0.716755569  |
| H  | 4.372826099  | 2.389590263  | -0.449086994 | C | 2.564085484  | 2.975876331  | 2.488303900  |
| H  | 1.928449035  | 0.464345902  | 2.520407677  | C | 2.658501387  | 4.295272827  | 2.035002708  |
| H  | 4.058509827  | 4.543866634  | 0.697957575  | C | 2.360905170  | -2.240873098 | -2.524980545 |
| H  | 1.650071859  | 2.606019735  | 3.693075657  | C | 1.513529062  | -2.930943251 | -3.400258780 |
| H  | 2.700291634  | 4.680844307  | 2.774404526  | C | 3.153441668  | -2.984206915 | -1.636592150 |
| H  | 0.139048427  | -1.198370218 | -3.406746387 | C | 1.471301794  | -4.327492237 | -3.403324604 |
| H  | 3.212525368  | -4.004078865 | -2.275533915 | C | 3.114720583  | -4.376535892 | -1.637575746 |
| H  | -1.086028337 | -2.994797945 | -4.531515121 | C | 2.276489258  | -5.054203033 | -2.525986195 |
| H  | 1.973722100  | -5.802097321 | -3.403139114 | H | -0.063057952 | 0.888534904  | -2.339492321 |
| H  | -0.171679169 | -5.318335056 | -4.562746525 | H | 1.235705972  | 2.078757763  | -2.385560989 |
| C  | 0.402660459  | -2.324827671 | 2.561068535  | H | 0.607801199  | 2.995404243  | -0.208813563 |
| C  | 1.794417858  | -2.317487955 | 2.830884695  | H | -0.850700498 | 2.901477337  | -1.192780614 |
| H  | 2.470094204  | -2.872196913 | 2.190231800  | H | -2.950566769 | 0.191500485  | 0.881888270  |
| C  | 2.294969320  | -1.663691759 | 3.950970888  | H | -1.134363055 | 3.690875530  | 1.314995050  |
| H  | 3.360034704  | -1.695442438 | 4.160415173  | H | -4.444589615 | 1.932500958  | -0.068858206 |
| C  | 1.434136868  | -0.961490631 | 4.801920414  | H | -3.061280966 | 2.797476530  | -0.729125917 |
| H  | -0.611108243 | -0.378912002 | 5.184256077  | H | -3.646121979 | 2.243388414  | 2.221580267  |
| C  | 0.062863827  | -0.929135203 | 4.537247181  | H | -3.501107216 | 3.828134298  | 1.480453372  |
| C  | -0.452126503 | -1.616761088 | 3.442699671  | H | 1.775273204  | -0.371123075 | -3.359065533 |
| H  | -1.522226572 | -1.627928972 | 3.265984774  | H | 3.977541924  | 0.218353137  | -0.110569634 |
| C  | -0.172135442 | -3.153610706 | 1.479848623  | H | 4.080706120  | -0.074781083 | -3.829557180 |
| H  | -1.086263537 | -3.645993471 | 1.784474134  | H | 4.590658188  | -0.871184289 | -2.351078749 |
| C  | 0.741908610  | -3.995888710 | 0.638605297  | H | 3.485387087  | 1.972201824  | -2.576911926 |
| H  | 0.209004685  | -4.454254627 | -0.192519680 | H | 5.059161186  | 1.488656998  | -1.954469919 |
| H  | 1.135235429  | -4.815436840 | 1.257882833  | H | -0.132452831 | 4.602072716  | 3.164299011  |
| H  | 1.586107969  | -3.432555676 | 0.237307698  | H | -2.368731499 | 0.964855254  | 3.662599325  |
| Cu | -0.213345066 | -1.042989969 | 0.672287464  | H | 0.298205703  | 4.672805786  | 5.598504066  |
| N  | -3.670047760 | -2.920063496 | 1.450511217  | H | -1.979243159 | 1.062120438  | 6.096712589  |
| C  | -1.953624368 | -4.708494663 | -1.225919843 | H | -0.631076455 | 2.905154943  | 7.082441807  |
| C  | -2.339332104 | -3.755103350 | -0.284720153 | H | -1.745404959 | -1.713805079 | -0.104352616 |
| C  | -2.572080612 | -5.964585304 | -1.188002944 | H | -3.139975786 | 1.538990974  | -2.549666882 |
| H  | -1.200935125 | -4.484993935 | -1.973349810 | H | -1.370671511 | -3.079282284 | -2.130771160 |
| C  | -3.361279488 | -4.047781944 | 0.653488755  | H | -2.786611319 | 0.168581113  | -4.567080498 |
| C  | -1.923815131 | -2.382597685 | -0.005937772 | H | -1.887506366 | -2.141343355 | -4.378638744 |
| C  | -3.557848454 | -6.256408691 | -0.237234399 | H | 3.595654249  | 3.702301502  | -1.180369258 |
| H  | -2.283329248 | -6.723632336 | -1.909234524 | H | 2.784880638  | 0.897631884  | 1.978080630  |
| C  | -3.973175287 | -5.294907570 | 0.693379343  | H | 3.129428864  | 5.568428993  | 0.362091392  |
| C  | -2.899930000 | -1.960085273 | 1.025857210  | H | 2.267143965  | 2.771503687  | 3.512440681  |
| H  | -1.636016726 | -1.745969892 | -0.843256772 | H | 2.451179266  | 5.120022297  | 2.710473299  |
| H  | -4.018390179 | -7.240077019 | -0.229669645 | H | 0.886787653  | -2.370882750 | -4.089591026 |
| H  | -4.756744862 | -5.501201153 | 1.415471315  | H | 3.811323643  | -2.471421957 | -0.938410938 |
| H  | -2.945366621 | -0.972110271 | 1.467274666  | H | 0.817762852  | -4.845622540 | -4.099946976 |
| H  | 1.833142877  | -0.442819178 | 5.668517113  | H | 3.737540245  | -4.934291363 | -0.944237173 |

---

V<sub>PC</sub>

---

|   |              |              |              |    |              |              |             |
|---|--------------|--------------|--------------|----|--------------|--------------|-------------|
| P | 1.756395578  | 0.108887658  | -0.987736046 | C  | 0.141548589  | -2.687099695 | 6.306277752 |
| C | 0.655908763  | 1.432345867  | -1.717575788 | C  | 1.067236066  | -3.220173359 | 7.213993073 |
| C | -0.089703679 | 2.298851728  | -0.684695780 | H  | 1.389432907  | -4.253825188 | 7.120202065 |
| P | -0.871453881 | 1.363025188  | 0.734643281  | C  | 1.580318332  | -2.440660000 | 8.251318932 |
| C | -2.558640957 | 0.838333786  | 0.084852099  | H  | 2.290003538  | -2.875410080 | 8.949566841 |
| C | -1.589174867 | 2.795767069  | 1.752833009  | C  | 1.185373545  | -1.108833075 | 8.394767761 |
| C | -3.379582405 | 2.136257887  | 0.085289262  | H  | 1.586007237  | -0.503241539 | 9.202149391 |
| C | -3.119203568 | 2.803346395  | 1.441651940  | H  | -0.035849411 | 0.472491145  | 7.583114624 |
| C | 2.423470497  | -0.729591250 | -2.552715540 | C  | 0.271568120  | -0.564684093 | 7.491292000 |
| C | 3.387015343  | 0.980025589  | -0.638809979 | C  | -0.245806351 | -1.350953341 | 6.460503578 |
| C | 3.864423513  | -0.161393210 | -2.760461092 | H  | -0.953049600 | -0.919561327 | 5.756804466 |
| C | 4.010482788  | 1.181319356  | -2.028708935 | C  | -0.396229297 | -3.510946751 | 5.143540382 |
| C | -1.278261065 | 2.781957626  | 3.233436823  | H  | -1.273789167 | -2.993610144 | 4.734967232 |
| C | -0.525745809 | 3.816044092  | 3.803413153  | C  | -0.839374602 | -4.919922829 | 5.565132141 |
| C | -1.777369380 | 1.778391242  | 4.078115940  | H  | -1.389381528 | -5.413551331 | 4.761266232 |
| C | -0.281081975 | 3.855725288  | 5.177793503  | H  | -1.496292233 | -4.856411457 | 6.437188625 |
| C | -1.551263809 | 1.825558662  | 5.453835487  | H  | 0.011742459  | -5.554461479 | 5.833719730 |
| C | -0.797677159 | 2.862691641  | 6.010094166  | Cu | 0.574434340  | -0.451023132 | 0.992238224 |
| C | -2.450252771 | 0.019717965  | -1.178712368 | N  | 0.720594823  | -2.072214365 | 2.168162107 |
| C | -1.962841868 | -1.295068502 | -1.085313559 | C  | 0.095838077  | -5.636830807 | 2.452424765 |
|   |              |              |              | C  | 0.355331331  | -4.299704075 | 2.730185509 |
|   |              |              |              | C  | -0.129421920 | -6.013369560 | 1.121134281 |
|   |              |              |              | H  | 0.076994427  | -6.382172108 | 3.240325212 |



C 0.409996420 -3.376176834 1.675137877  
C 0.684420586 -3.549509764 4.001363277  
C -0.063818306 -5.078439236 0.082682513  
H -0.341339290 -7.053466320 0.891805708  
C 0.223994941 -3.736439705 0.346701980  
C 0.911031365 -2.164268255 3.446702719  
H 1.611560106 -3.930438519 4.453722477  
H -0.203908637 -5.399353027 -0.944095254  
H 0.336239934 -3.009556293 -0.450175375  
H 1.139870882 -1.292493105 4.049593925

=====  
**VI<sub>PC</sub>**  
=====

P 1.537976027 -0.465126663 -0.563125730  
C 0.734153569 0.996896863 -1.407114387  
C 0.015562691 1.923581958 -0.406455457  
P -1.217566490 1.029374599 0.696961701  
C -2.867149115 1.364972949 -0.173073351  
C -1.596595049 2.351119757 2.004695415  
C -3.090844393 2.878012180 -0.006598552  
C -2.772557259 3.231719732 1.458133459  
C 2.056487799 -1.544160247 -2.038516760  
C 3.332584858 0.057180744 -0.188234419  
C 3.527638674 -1.878277183 -1.726177454  
C 4.192399025 -0.563507140 -1.306718707  
C -1.886688590 1.712495923 3.349787474  
C -0.963474214 1.815790534 4.395949364  
C -3.052471876 0.959388137 3.563128948  
C -1.186979890 1.183581114 5.618309975  
C -3.284378052 0.327454746 4.785372257  
C -2.348758459 0.436163098 5.817248344  
C -2.972552299 0.785380661 -1.560223103  
C -3.415187359 -0.537968934 -1.715006590  
C -2.621832132 1.504032373 -2.712158680  
C -3.512528419 -1.121726274 -2.976252794  
C -2.709432840 0.917734325 -3.976861000  
C -3.158132315 -0.396052629 -4.115831852  
C 3.486547470 1.537790298 0.078799918  
C 3.906944990 2.460199356 -0.895087540  
C 3.157392263 2.019221783 1.362087846  
C 3.992810249 3.823554754 -0.599893749  
C 3.236138105 3.379287720 1.654645562  
C 3.655977249 4.289740086 0.673468411  
C 1.144059777 -2.703978300 -2.374807358  
C -0.045856826 -2.461394310 -3.081157684  
C 1.458095789 -4.033054352 -2.059749600  
C -0.878901362 -3.507318974 -3.476979971  
C 0.631373644 -5.082779884 -2.461891413  
C -0.540264666 -4.829410553 -3.177387714  
H 0.015913133 0.587771297 -2.127242804  
H 1.481314778 1.568592668 -1.970161796  
H 0.752590299 2.360106707 0.275943369  
H -0.456368208 2.754809141 -0.940875411  
H -3.592884302 0.845235348 0.465717286  
H -0.682443500 2.946745634 2.095303297  
H -4.118237495 3.152795076 -0.275516570  
H -2.434376955 3.437280655 -0.680997550  
H -3.660161972 3.052347898 2.073454142  
H -2.534292936 4.295693398 1.564283252  
H 2.051455975 -0.862802327 -2.900921345  
H 3.527402878 -0.464791775 0.755373895  
H 4.016213417 -2.337768078 -2.593403578  
H 3.586461544 -2.596736908 -0.900212586  
H 4.234330654 0.097778186 -2.180535555  
H 5.223772049 -0.708759427 -0.965542555  
H -0.038726024 2.362952471 4.237162590  
H -3.789877176 0.859422803 2.768434525  
H -0.437217772 1.246343136 6.401140213  
H -4.195025444 -0.250425756 4.929792881  
H -2.518578529 -0.063419305 6.767663479  
H -3.682326317 -1.113569736 -0.832694530  
H -2.279561043 2.531007528 -2.629252672  
H -3.868117094 -2.143734694 -3.073024511  
H -2.433128595 1.494808435 -4.855556965

H -3.234439850 -0.848334670 -5.100858688  
H 4.182626724 2.124288797 -1.892990351  
H 2.817954779 1.312598348 2.115402937  
H 4.326745033 4.520110130 -1.370208144  
H 2.974935770 3.727001667 2.654032946  
H 3.723459721 5.350380421 0.901636660  
H -0.320948958 -1.441708684 -3.340750694  
H 2.353247881 -4.263415337 -1.489317894  
H -1.787681460 -3.284703732 -4.029190540  
H 0.905281901 -6.102517128 -2.205229521  
H -1.185289145 -5.647519112 -3.486028433  
C -3.265050650 -5.064625263 0.149479568  
C -4.164412022 -5.650682449 1.049935102  
H -3.818678617 -6.423170090 1.733011127  
C -5.502912998 -5.255625725 1.083639264  
H -6.184506893 -5.722312450 1.789939642  
C -5.967337608 -4.265016079 0.215140745  
H -7.009315014 -3.958882093 0.240073457  
H -5.428860664 -2.899793863 -1.364470124  
C -5.079252720 -3.672677040 -0.684948444  
C -3.740176916 -4.068975925 -0.713845968  
H -3.047656059 -3.603919029 -1.411109924  
C -1.799195647 -5.466597080 0.100911878  
H -1.328296065 -4.910998344 -0.713959277  
C -1.624540806 -6.962471485 -0.192211941  
H -0.574825406 -7.203862190 -0.372632980  
H -2.193343878 -7.238136768 -1.085792184  
H -1.982823491 -7.581589222 0.637472630  
Cu 0.160036936 -0.845133603 1.337583542  
N -0.117526285 -2.878200054 1.588590384  
C 1.350229740 -6.180925369 1.246561050  
C 0.454783261 -5.123162270 1.357400894  
C 2.723368883 -5.898135185 1.212772369  
H 1.006643176 -7.209227562 1.199667454  
C 0.949731648 -3.813120365 1.455884814  
C -1.055557609 -5.032619953 1.408946753  
C 3.194841623 -4.584193707 1.315214634  
H 3.431917667 -6.717454910 1.124941945  
C 2.306794643 -3.511230469 1.451781273  
C -1.222773314 -3.543271065 1.613221765  
H -1.480402112 -5.591145039 2.254935741  
H 4.264258862 -4.393530369 1.318520069  
H 2.638551950 -2.491763115 1.625303984  
H -2.179462433 -3.040405273 1.694253206  
O 0.938314259 0.071113415 2.980244637  
C 1.919996619 -0.485787719 3.590566635  
O 2.937498808 -0.980328619 3.063686371  
C 1.786979437 -0.491324902 5.102057457  
C 0.968348265 -1.454966903 5.713571072  
C 2.455235958 0.469700038 5.877709389  
C 0.825928569 -1.440495133 7.104879856  
C 2.285711288 0.458058059 7.265540600  
C 1.473962426 -0.491372585 7.900005341  
H 0.184498385 -2.183372021 7.576984882  
H 2.798453331 1.207301021 7.867835045  
C 3.313974619 1.513171196 5.201474190  
H 3.847450256 2.133137941 5.928182125  
H 4.043219566 1.043889046 4.533155441  
H 2.696846008 2.175997019 4.580834866  
C 0.201200172 -2.441465855 4.867273808  
H -0.522622585 -1.910566211 4.239434242  
H 0.869168460 -2.983358622 4.189794540  
H -0.334988654 -3.171745539 5.482013702  
C 1.311888337 -0.482127160 9.403419495  
H 0.573705912 -1.221377254 9.732164383  
H 2.258640289 -0.710891247 9.910251617  
H 0.985016167 0.501068234 9.764890671

=====  
**VI<sub>PC-TS</sub>**  
=====

P 2.528069019 -0.860606551 -0.888522446  
C 1.701743007 0.574146569 -1.778817534  
C 1.113212824 1.683996677 -0.886647582  
P 0.200134858 1.034728646 0.608251512



|    |              |              |              |
|----|--------------|--------------|--------------|
| C  | -2.111875057 | -1.647751927 | -3.538893461 |
| C  | 4.336155891  | 1.054568291  | -0.113137126 |
| C  | 4.782377720  | 2.064668179  | -0.974862397 |
| C  | 3.877745390  | 1.417977810  | 1.163427591  |
| C  | 4.772169590  | 3.403342962  | -0.571589768 |
| C  | 3.874281645  | 2.749706268  | 1.567635059  |
| C  | 4.319356441  | 3.752250433  | 0.701103091  |
| C  | 2.360072613  | -3.370493650 | -2.584455490 |
| C  | 1.289698482  | -3.359221697 | -3.489602804 |
| C  | 2.659946918  | -4.568083763 | -1.920502424 |
| C  | 0.552098870  | -4.515097141 | -3.742075682 |
| C  | 1.926357865  | -5.725964546 | -2.174006462 |
| C  | 0.875820756  | -5.706736088 | -3.092442989 |
| H  | 0.960109055  | -0.092906736 | -2.528807163 |
| H  | 2.487608433  | 0.792761624  | -2.640306711 |
| H  | 1.940034389  | 2.202767849  | -0.750960410 |
| H  | 0.487649709  | 2.155549765  | -1.752957940 |
| H  | -2.076173544 | 0.466686577  | 0.731260180  |
| H  | 0.680244803  | 3.315096378  | 0.945165932  |
| H  | -3.080690861 | 2.520187378  | -0.264959127 |
| H  | -1.540339313 | 2.930005789  | -1.017337441 |
| H  | -2.092383623 | 2.656970263  | 1.982787848  |
| H  | -1.558452725 | 4.120191097  | 1.162382603  |
| H  | 3.040660143  | -1.475706220 | -3.250360966 |
| H  | 4.524466515  | -0.994037986 | 0.368698150  |
| H  | 5.161691666  | -2.640103579 | -2.977995396 |
| H  | 4.835215569  | -2.968837976 | -1.276580215 |
| H  | 5.096314907  | -0.193511173 | -2.525232077 |
| H  | 6.218271732  | -0.893244267 | -1.355069995 |
| H  | 1.432048440  | 4.261301041  | 3.007148981  |
| H  | -0.706616282 | 0.533872604  | 3.053388596  |
| H  | 1.942478657  | 3.992751598  | 5.417201996  |
| H  | -0.212103143 | 0.270667493  | 5.449798107  |
| H  | 1.127356529  | 1.981150389  | 6.647316933  |
| H  | -1.654859781 | -1.743897080 | -0.169482127 |
| H  | -1.949951410 | 1.663874984  | -2.782632589 |
| H  | -1.951201916 | -3.251228571 | -2.094034195 |
| H  | -2.228297472 | 0.156122610  | -4.714943409 |
| H  | -2.241975784 | -2.309471846 | -4.391215801 |
| H  | 5.148963928  | 1.818154812  | -1.966609836 |
| H  | 3.498657227  | 0.651942313  | 1.831490159  |
| H  | 5.122448921  | 4.172076225  | -1.255959153 |
| H  | 3.507939577  | 3.004601717  | 2.557078362  |
| H  | 4.313663483  | 4.793223858  | 1.013981104  |
| H  | 1.026954174  | -2.433872223 | -3.997407436 |
| H  | 3.465389729  | -4.601883888 | -1.193626165 |
| H  | -0.274862468 | -4.482675552 | -4.446646690 |
| H  | 2.166714430  | -6.641277790 | -1.640981078 |
| H  | 0.306076914  | -6.610514641 | -3.289318323 |
| C  | -0.594361484 | -2.819532633 | 6.101399899  |
| C  | 0.764538467  | -2.513287783 | 6.294934750  |
| H  | 1.522724748  | -3.053198576 | 5.735819817  |
| C  | 1.159996510  | -1.518834114 | 7.189646244  |
| H  | 2.218098879  | -1.300804257 | 7.320015430  |
| C  | 0.202872634  | -0.806970298 | 7.919254780  |
| H  | 0.509456873  | -0.037319895 | 8.624079704  |
| H  | -1.905837297 | -0.536668301 | 8.281709671  |
| C  | -1.150565267 | -1.089212656 | 7.727473259  |
| C  | -1.541184545 | -2.083676815 | 6.824142933  |
| H  | -2.598730326 | -2.299647331 | 6.685955524  |
| C  | -1.015724540 | -3.955007315 | 5.172399044  |
| H  | -2.098980665 | -4.100231171 | 5.308291435  |
| C  | -0.328542739 | -5.268550396 | 5.621519566  |
| H  | -0.683273673 | -6.119942665 | 5.037318230  |
| H  | -0.529827535 | -5.466410160 | 6.679896832  |
| H  | 0.756178737  | -5.208629608 | 5.484091759  |
| Cu | 1.053758860  | -1.244966984 | 0.849052429  |
| N  | -0.083568782 | -2.538262129 | 1.801392913  |
| C  | -1.416943192 | -5.844412327 | 2.408815145  |
| C  | -0.919115663 | -4.537850857 | 2.585220337  |
| C  | -1.423939943 | -6.403654099 | 1.138467908  |
| H  | -1.812747955 | -6.406654835 | 3.250612736  |
| C  | -0.458391368 | -3.809357882 | 1.438176036  |
| C  | -0.752721786 | -3.654068708 | 3.709474564  |
| C  | -0.921703517 | -5.692513466 | 0.024854312  |
| H  | -1.814859390 | -7.408567905 | 0.997294724  |
| C  | -0.432491779 | -4.399932861 | 0.163484961  |
| C  | -0.278019279 | -2.463015318 | 3.166903019  |
| H  | 1.616140723  | -3.041946650 | 3.369725227  |
| H  | -0.912127197 | -6.163769245 | -0.953077972 |
| H  | -0.035941217 | -3.849876642 | -0.684611022 |
| H  | -0.036511257 | -1.549543619 | 3.690795183  |
| C  | 7.280759811  | -1.213055491 | 2.717187643  |
| C  | 6.529211044  | -0.393173367 | 3.563308239  |
| C  | 6.639364243  | -2.288295031 | 2.087753773  |
| C  | 8.754891396  | -0.963579178 | 2.492303610  |
| H  | 7.016855240  | 0.439927906  | 4.067133427  |
| C  | 5.159840107  | -0.597970128 | 3.765583992  |
| H  | 7.214155197  | -2.934343100 | 1.425327897  |
| C  | 5.279760361  | -2.554998159 | 2.278858423  |
| C  | 4.539087772  | -1.680269957 | 3.109036922  |
| C  | 4.389178753  | 0.341587126  | 4.670382023  |
| C  | 4.638685703  | -3.723443985 | 1.557322621  |
| C  | 3.053000927  | -1.798697233 | 3.181313515  |
| O  | 2.314175844  | -0.838072360 | 2.973683596  |
| O  | 2.606102943  | -3.025276899 | 3.447277069  |
| H  | 3.895297050  | 1.132403731  | 4.095351696  |
| H  | 3.598486185  | -0.168484256 | 5.228554726  |
| H  | 5.068213463  | 0.819661498  | 5.385046005  |
| H  | 3.704858780  | -3.437664032 | 1.059932351  |
| H  | 5.323072910  | -4.133800030 | 0.807203114  |
| H  | 4.375654221  | -4.522779465 | 2.256733418  |
| H  | 9.366669655  | -1.669799685 | 3.067733526  |
| H  | 9.022424698  | -1.091888666 | 1.436806679  |
| H  | 9.043401718  | 0.047927812  | 2.795113325  |

---

VII<sub>PC</sub>-TS

---

|   |               |              |               |
|---|---------------|--------------|---------------|
| P | 2.393763542   | -0.825541496 | -1.255217075  |
| C | 1.753639340   | 0.573553324  | -2.322870731  |
| C | 1.283938766   | 1.797515512  | -1.497436643  |
| P | 0.237642795   | 1.343095183  | -0.006745802  |
| C | -1.527658224  | 1.573847651  | -0.614130676  |
| C | 0.190928236   | 2.932152987  | 1.013079405   |
| C | -1.717205405  | 3.097778559  | -0.654107153  |
| C | -1.178920150  | 3.618401766  | 0.687008619   |
| C | 2.849218130   | -2.194374084 | -2.477888107  |
| C | 4.200325012   | -0.391902655 | -0.929927289  |
| C | 4.405010223   | -2.148024559 | -2.629940748  |
| C | 4.916978836   | -0.756292641 | -2.239330292  |
| C | 0.356415719   | 2.683827877  | 2.499008417   |
| C | 1.140704751   | 3.536798716  | 3.282683611   |
| C | -0.330888480  | 1.637144089  | 3.133029222   |
| C | 1.236780643   | 3.351559639  | 4.664882660   |
| C | -0.239496872  | 1.448524237  | 4.509538174   |
| C | 0.543989658   | 2.309740305  | 5.281317711   |
| C | -1.805810332  | 0.745491743  | -1.841499329  |
| C | -1.935611248  | -0.645461500 | -1.688077092  |
| C | -1.867966175  | 1.287931442  | -3.129803896  |
| C | -2.1116392612 | -1.472877502 | -2.793009996  |
| C | -2.052487373  | 0.458478510  | -4.240085602  |
| C | -2.173299551  | -0.921579957 | -4.076571465  |
| C | 4.383933067   | 0.991467297  | -0.355910212  |
| C | 4.903649807   | 2.057321548  | -1.099132061  |
| C | 3.962610483   | 1.227349401  | 0.964344621   |
| C | 4.987803936   | 3.336712599  | -0.541219652  |
| C | 4.046302319   | 2.502198935  | 1.518101931   |
| C | 5.454592133   | 3.565390825  | 0.764961600   |
| C | 2.366806746   | -3.555195332 | -2.017444849  |
| C | 1.761846423   | -4.447734833 | -2.908862591  |
| C | 2.558067322   | -3.963394165 | -0.687425196  |
| C | 1.365828753   | -5.719707012 | -2.485185146  |
| C | 2.151978493   | -5.223646641 | -0.258269757  |
| C | 1.560866594   | -6.110784531 | -1.160829067  |
| H | 0.905206025   | 0.153233513  | -2.876253128  |
| H | 2.502607822   | 0.891446650  | -3.1057392597 |
| H | 2.151442289   | 2.335028648  | -1.102723718  |
| H | 0.738695085   | 2.487776041  | -2.150607347  |
| H | -2.136298418  | 1.180388451  | 0.211806640   |



|    |              |              |              |   |              |              |              |
|----|--------------|--------------|--------------|---|--------------|--------------|--------------|
| H  | -1.517330527 | -2.629373550 | -3.297970533 | C | -0.562657893 | 1.725230217  | 0.298801869  |
| H  | -2.141262531 | 1.412688732  | -4.657283306 | P | -1.565457225 | 0.380767882  | 1.110597968  |
| H  | -1.777507901 | -0.992729545 | -5.183697701 | C | -3.305303335 | 0.600753069  | 0.408964157  |
| H  | 4.803855896  | 2.043959379  | -1.904902816 | C | -2.027809143 | 1.120465875  | 2.793838263  |
| H  | 3.784808874  | 0.069816492  | 1.786394238  | C | -3.884340048 | 1.773543596  | 1.222414374  |
| H  | 4.924821854  | 4.199244976  | -0.712136805 | C | -3.545084715 | 1.464604259  | 2.684326649  |
| H  | 3.882094145  | 2.229479313  | 2.968542814  | C | 1.809930325  | -0.693453789 | -2.447331190 |
| H  | 4.455012798  | 4.312600613  | 1.728685737  | C | 2.766115189  | 0.101952210  | 0.020817626  |
| H  | 1.619774938  | -4.214060307 | -3.877477884 | C | 3.343126774  | -0.646059155 | -2.251205206 |
| H  | 3.092664719  | -3.409668207 | 0.086196192  | C | 3.643477917  | 0.431081921  | -1.200734615 |
| H  | 1.312436581  | -6.591094017 | -3.263266563 | C | -1.724795222 | 0.262864560  | 4.003101826  |
| H  | 2.787572384  | -5.737187862 | 0.697019875  | C | -1.153043270 | 0.836195409  | 5.146079063  |
| H  | 1.905622482  | -7.384661198 | -0.979509294 | C | -2.105041981 | -1.085987329 | 4.046999931  |
| C  | -2.557867527 | -1.027819514 | 4.582277775  | C | -0.967134655 | 0.081603713  | 6.306906223  |
| C  | -1.677066207 | -1.585668445 | 5.523453712  | C | -1.922964573 | -1.841210842 | 5.204417706  |
| H  | -1.333905101 | -2.607884645 | 5.393330574  | C | -1.356610775 | -1.259197235 | 6.341755867  |
| C  | -1.244063497 | -0.850103557 | 6.626391411  | C | -3.367317915 | 0.643135905  | -1.097336173 |
| H  | -0.559438586 | -1.302381635 | 7.339416504  | C | -3.517784834 | -0.561124921 | -1.805750370 |
| C  | -1.694700122 | 0.457971185  | 6.820530415  | C | -3.252832174 | 1.834925413  | -1.825797915 |
| H  | -1.357103109 | 1.032223225  | 7.678962708  | C | -3.530188322 | -0.577607810 | -3.199830532 |
| H  | -2.934906244 | 2.038010359  | 6.040964127  | C | -3.262257576 | 1.818954468  | -3.222893238 |
| C  | -2.578953266 | 1.020858645  | 5.901459217  | C | -3.390011549 | 0.613965452  | -3.915025949 |
| C  | -3.006493092 | 0.280903459  | 4.796683311  | C | 2.639976978  | 1.113391161  | 1.134886861  |
| H  | -3.711317539 | 0.722913027  | 4.095727921  | C | 2.980719805  | 2.461632013  | 0.981131017  |
| C  | -3.091655731 | -1.850278854 | 3.420214415  | C | 2.087886810  | 0.694366038  | 2.355477810  |
| H  | -3.730453014 | -1.187724710 | 2.817682743  | C | 2.773234367  | 3.368511677  | 2.025278330  |
| C  | -4.001665592 | -2.979435682 | 3.968920469  | C | 1.884496331  | 1.593985558  | 3.397857666  |
| H  | -4.436078548 | -3.567734480 | 3.157294512  | C | 2.223181963  | 2.940643311  | 3.234102726  |
| H  | -4.812919617 | -2.559931517 | 4.573379517  | C | 1.232836604  | -1.909579515 | -3.144655943 |
| H  | -3.422420979 | -3.660845995 | 4.599898815  | C | -0.158883393 | -2.089931726 | -3.185075521 |
| Cu | 1.225372076  | -0.957962811 | 1.074803472  | C | 2.046993494  | -2.859059095 | -3.772006035 |
| N  | -0.044616014 | -3.085220098 | 1.595722318  | C | -0.718366325 | -3.196562290 | -3.821393728 |
| C  | -3.464125395 | -3.407210112 | 0.543268979  | C | 1.488221645  | -3.973626137 | -4.401901722 |
| C  | -2.293555975 | -3.123018265 | 1.270916700  | C | 0.104969129  | -4.148855686 | -4.428791523 |
| C  | -3.370515108 | -4.132519722 | -0.639531136 | H | -0.530841231 | 1.053037643  | -1.767902255 |
| H  | -4.430378437 | -3.058820009 | 0.896479964  | H | 0.887320697  | 1.997871637  | -1.297559977 |
| C  | -1.040313721 | -3.556262493 | 0.753512859  | H | 0.145005718  | 2.084760666  | 1.049080968  |
| C  | -2.026760817 | -2.417299986 | 2.505686522  | H | -1.214078665 | 2.564766169  | 0.035766501  |
| C  | -2.121236086 | -4.587359905 | -1.112640977 | H | -3.838122368 | -0.300225288 | 0.740353823  |
| H  | -4.270735741 | -4.353152752 | -1.206194162 | H | -1.455236197 | 2.053205729  | 2.856859207  |
| C  | -0.944066346 | -4.301868916 | -0.426145613 | H | -4.964067459 | 1.857980609  | 1.058649063  |
| C  | -0.659981251 | -2.433585882 | 2.660986662  | H | -3.435914278 | 2.727125645  | 0.918673813  |
| H  | 0.919719994  | -3.469529390 | 1.715384483  | H | -4.126200199 | 0.596083879  | 3.016342402  |
| H  | -2.071287632 | -5.166286469 | -2.030793667 | H | -3.788991928 | 2.290514469  | 3.359529972  |
| H  | 0.015513092  | -4.634160995 | -0.795999527 | H | 1.522626758  | 0.199535578  | -3.019937754 |
| H  | -0.039618559 | -2.020860672 | 3.440987110  | H | 3.133585215  | -0.834380209 | 0.456045300  |
| C  | 6.285379887  | -2.840051889 | 5.610587120  | H | 3.849272251  | -0.447512895 | -3.201083422 |
| C  | 5.308159828  | -1.854822874 | 5.754780769  | H | 3.706292391  | -1.616443038 | -1.889656305 |
| C  | 6.147243023  | -3.746114492 | 4.557765007  | H | 3.390942335  | 1.417959094  | -1.607136607 |
| C  | 7.437275887  | -2.953561544 | 6.581666946  | H | 4.702594280  | 0.457575828  | -0.924054265 |
| H  | 5.392316818  | -1.142465353 | 6.573536873  | H | -0.866775632 | 1.885554314  | 5.133571625  |
| C  | 4.218455315  | -1.751945853 | 4.882825375  | H | -2.539638042 | -1.577251792 | 3.182432175  |
| H  | 6.899983406  | -4.521468163 | 4.426392555  | H | -0.529946387 | 0.546101809  | 7.186366558  |
| C  | 5.067392349  | -3.700745583 | 3.671282291  | H | -2.225614786 | -2.884421110 | 5.204678535  |
| C  | 4.092626095  | -2.682969809 | 3.823957443  | H | -1.224514723 | -1.842954397 | 7.248297215  |
| C  | 3.205586672  | -0.658930004 | 5.140960693  | H | -3.650370598 | -1.490924239 | -1.259465337 |
| C  | 5.006388664  | -4.754886150 | 2.585855246  | H | -3.174981356 | 2.786339521  | -1.308045149 |
| C  | 2.916143179  | -2.615680456 | 2.875329494  | H | -3.662152767 | -1.518602371 | -3.727503777 |
| O  | 2.442209482  | -1.451244473 | 2.616538048  | H | -3.179095030 | 2.753381252  | -3.770435810 |
| O  | 2.465732813  | -3.689025640 | 2.398908854  | H | -3.400414467 | 0.604299963  | -5.000761032 |
| H  | 3.228993654  | 0.107714295  | 4.364540100  | H | 3.416593313  | 2.816459894  | 0.052688178  |
| H  | 2.181891441  | -1.044836044 | 5.136518955  | H | 1.802257657  | -0.342506707 | 2.485104322  |
| H  | 3.392890930  | -0.183308616 | 6.109468937  | H | 3.046822786  | 4.411202908  | 1.891174912  |
| H  | 4.799547195  | -4.326036930 | 1.602279186  | H | 1.455440879  | 1.240454793  | 4.330214500  |
| H  | 5.952812672  | -5.303030491 | 2.533700943  | H | 2.067974806  | 3.647748947  | 4.043976784  |
| H  | 4.198213100  | -5.464774609 | 2.782366991  | H | -0.819148481 | -1.363832712 | -2.715367317 |
| H  | 7.219666004  | -3.690839052 | 7.365609169  | H | 3.125801802  | -2.743484020 | -3.771943808 |
| H  | 8.354361534  | -3.279668093 | 6.079247952  | H | -1.798532844 | -3.315047741 | -3.846502066 |
| H  | 7.642440319  | -1.999816895 | 7.077887535  | H | 2.138754845  | -4.702814102 | -4.876192570 |
|    |              |              |              | H | -0.328255445 | -5.014157772 | -4.921860695 |
|    |              |              |              | C | 1.575983644  | -3.069205523 | 1.889956474  |
|    |              |              |              | C | 2.982594967  | -2.880791903 | 1.901697516  |
|    |              |              |              | H | 3.561916351  | -3.086680889 | 1.007539272  |
|    |              |              |              | C | 3.627584696  | -2.487184525 | 3.064832687  |
|    |              |              |              | H | 4.706547260  | -2.364209890 | 3.072134018  |

---

IV<sub>p</sub>

---

|   |             |              |              |
|---|-------------|--------------|--------------|
| P | 1.103152633 | -0.371492326 | -0.721076727 |
| C | 0.180707037 | 1.233615637  | -0.953634441 |

C 2.890003920 -2.248600245 4.234447956  
H 3.403104305 -1.932723522 5.138473034  
H 0.926551938 -2.223431826 5.142278671  
C 1.501614332 -2.417742014 4.242640972  
C 0.847908020 -2.837375641 3.090209484  
H -0.227574825 -3.002074957 3.090600252  
C 0.853513241 -3.528819799 0.734132469  
H -0.074143618 -4.038494110 0.969208419  
C 1.522403240 -4.009255409 -0.512289166  
H 0.794902861 -4.144932747 -1.312796474  
H 1.977165461 -4.990513325 -0.305722475  
H 2.315593719 -3.348199606 -0.866647184  
Cu -0.433805317 -1.726162672 0.530105710  
N -2.262975693 -3.675447702 1.959309578  
C -1.373937964 -6.199645996 -0.544653475  
C -1.786598325 -4.985063553 0.075226456  
C -1.107753634 -7.288803101 0.253526360  
H -1.280336738 -6.261107922 -1.626535177  
C -1.893873215 -4.914165020 1.528906822  
C -2.093616962 -3.697711229 -0.382594258  
C -1.219922066 -7.213238239 1.679499865  
H -0.804503322 -8.229660988 -0.198212370  
C -1.586905718 -6.046935558 2.318046331  
C -2.371576786 -2.938569069 0.815422058  
H -2.134099007 -3.338396788 -1.400392890  
H -0.994698346 -8.099209785 2.267714977  
H -1.667279124 -5.989578247 3.400309801  
H -2.939306259 -2.018379688 0.841043651

=====  
**III<sub>PN</sub>-TS'**  
=====

P 1.274037480 -0.215126395 -0.760349751  
C 0.299770385 1.376450896 -0.817650318  
C -0.452404350 1.722460866 0.473893821  
P -1.351061583 0.269228935 1.231771827  
C -3.136612654 0.317547798 0.644778609  
C -1.794828773 1.009742141 2.924474955  
C -3.736896276 1.536398888 1.377233505  
C -3.302149057 1.431933522 2.841967583  
C 1.813049555 -0.418744236 -2.551295519  
C 2.984057665 0.199810356 -0.112076677  
C 3.356728792 -0.460995585 -2.457357645  
C 3.781235218 0.557028115 -1.380360365  
C -1.523231983 0.150676236 4.136977673  
C -0.847065210 0.686416030 5.240019321  
C -2.055873632 -1.144706368 4.231287479  
C -0.730944812 -0.039004538 6.429952145  
C -1.944445491 -1.866379857 5.418488979  
C -1.288853049 -1.316061258 6.526050568  
C -3.439040899 0.240694895 -0.833816707  
C -4.139212132 -0.867603064 -1.337383509  
C -3.109628439 1.280192256 -1.720210552  
C -4.474489212 -0.952493370 -2.691159964  
C -3.437361479 1.195736766 -3.076043606  
C -4.117009163 0.075843833 -3.567471981  
C 2.892585754 1.166894913 1.046547651  
C 3.139834881 2.538775682 0.919823229  
C 2.414645672 0.683380961 2.275345564  
C 2.904543400 3.404223204 1.992915034  
C 2.180823088 1.542235851 3.345803022  
C 2.418867826 2.912526369 3.205410957  
C 1.082403660 -1.549674273 -3.249507427  
C -0.315073460 -1.461926818 -3.379585981  
C 1.728248954 -2.685800314 -3.744810820  
C -1.048185587 -2.488771439 -3.966613531  
C 0.994599819 -3.717710972 -4.339429379  
C -0.392874926 -3.626539469 -4.446972847  
H -0.401520044 1.247042894 -1.648925066  
H 0.981549740 2.190917730 -1.088876247  
H 0.262250155 2.045878887 1.236349344  
H -1.132988334 2.563326359 0.302307010  
H -3.520920515 -0.599881947 1.112297893  
H -1.170275450 1.909420133 2.990801573  
H -4.828477383 1.534678698 1.278798103

H -3.380288363 2.469733953 0.921324551  
H -3.905688047 0.662620962 3.343338251  
H -3.459314823 2.367581129 3.395502329  
H 1.535072088 0.525858223 -3.037488937  
H 3.355087757 -0.759750962 0.272570431  
H 3.811700583 -0.253706634 -3.430792809  
H 3.690190554 -1.461139441 -2.152842522  
H 3.534568310 1.569694877 -1.721815825  
H 4.859124184 0.530917525 -1.190142870  
H -0.431979656 1.690311551 5.176683426  
H -2.543678284 -1.591769934 3.367234945  
H -0.220262975 0.399404705 7.283743382  
H -2.374083042 -2.861411333 5.482949257  
H -1.222909570 -1.875162244 7.456151009  
H -4.413490772 -1.674374223 -0.661301732  
H -2.611021280 2.173189163 -1.350284576  
H -5.019750595 -1.820490956 -3.055998564  
H -3.174420357 2.010898829 -3.746621132  
H -4.378352642 0.013345694 -4.621012688  
H 3.521728277 2.943603754 -0.012367068  
H 2.208657980 -0.373999178 2.388366699  
H 3.102018356 4.466191292 1.877815366  
H 1.803320527 1.138465405 4.280290604  
H 2.234293938 3.589936972 4.034372807  
H -0.845196605 -0.581714034 -3.021326542  
H 2.807990074 -2.776028156 -3.679306507  
H -2.127759933 -2.395965099 -4.042939186  
H 1.513619065 -4.593461037 -4.718774796  
H -0.959347427 -4.431309223 -4.906582355  
C 1.697481513 -3.114777088 1.907544255  
C 3.105463743 -2.941867113 2.010595560  
H 3.737296581 -3.161788464 1.156501651  
C 3.678125381 -2.551344872 3.211252928  
H 4.756324291 -2.449882984 3.290549517  
C 2.867649555 -2.273007393 4.324485779  
H 3.324462414 -1.956215501 5.257790089  
H 0.849775970 -2.188316345 5.094800472  
C 1.478691578 -2.405575275 4.238006115  
C 0.896348298 -2.839707136 3.053516388  
H -0.176434025 -2.987694979 2.994903803  
C 1.047366023 -3.551628828 0.698886991  
H 0.085552387 -4.037137032 0.843494415  
C 1.781475544 -3.968321323 -0.531203389  
H 1.092852116 -4.026870251 -1.374153733  
H 2.211906195 -4.969384193 -0.373561203  
H 2.601270676 -3.293195963 -0.790589988  
Cu 0.030488983 -1.634286642 0.572142601  
N -2.057005644 -2.876200914 0.949736595  
C -1.876387358 -6.483676434 0.512706399  
C -1.870774865 -5.091560364 0.280011207  
C -2.062810659 -6.937508583 1.804904699  
H -1.741215348 -7.181910992 -0.308644116  
C -2.070744276 -4.163074493 1.382995725  
C -1.730446577 -4.283526421 -0.883888721  
C -2.248566389 -6.034163952 2.891485929  
H -2.067223787 -8.005331039 2.006124258  
C -2.254986286 -4.668733597 2.703259468  
C -1.805475712 -2.973608255 -0.446098447  
H -1.583120823 -4.609924793 -1.903279305  
H -2.384161949 -6.440899372 3.889761448  
H -2.424443245 -4.023852825 3.560099125  
H -1.919048905 -2.101386786 -1.077985406

=====  
**III<sub>PC</sub>-TS'**  
=====

P 1.199340940 -0.362062544 -0.756513000  
C 0.257787794 1.237622142 -0.940292835  
C -0.473619699 1.687088847 0.331659794  
P -1.453250766 0.315724075 1.131493688  
C -3.210313559 0.583624482 0.457878590  
C -1.899294972 1.087225318 2.812616587  
C -3.717984915 1.824676871 1.216757059  
C -3.378727198 1.577484250 2.687887907  
C 1.825874090 -0.656472802 -2.508107901

C 2.875250101 0.148089215 -0.071944922  
C 3.364466667 -0.598060727 -2.373622417  
C 3.694316387 0.486924738 -1.332839727  
C -1.723432183 0.220415086 4.039050579  
C -1.160108566 0.753724575 5.204901218  
C -2.227717161 -1.086734056 4.076270103  
C -1.100349784 -0.002271297 6.378655434  
C -2.168852568 -1.845485091 5.243085384  
C -1.604951262 -1.304948211 6.402315617  
C -3.333349466 0.570453584 -1.045177341  
C -3.685629606 -0.625571668 -1.690664530  
C -3.101940155 1.707172155 -1.833373189  
C -3.770943403 -0.695121646 -3.080915928  
C -3.183924675 1.639064789 -3.225930214  
C -3.504750490 0.435414612 -3.855547905  
C 2.734764814 1.162771225 1.040371418  
C 3.038894653 2.518348932 0.872020125  
C 2.178084373 0.747370660 2.261765480  
C 2.792638779 3.434744358 1.899677753  
C 1.936016917 1.656662583 3.287829638  
C 2.239976883 3.009559631 3.107930899  
C 1.185657263 -1.861093760 -3.168434858  
C -0.216934115 -1.960097194 -3.183842897  
C 1.931303620 -2.874350309 -3.776732683  
C -0.852982461 -3.047838688 -3.776290417  
C 1.294397593 -3.972290039 -4.362781048  
C -0.097195849 -4.065981865 -4.364700794  
H -0.465080291 1.067095995 -1.746325850  
H 0.948120773 2.019137383 -1.278460264  
H 0.236882657 2.047205687 1.077621102  
H -1.140346050 2.523183107 0.100419424  
H -3.775072813 -0.267604262 0.853223026  
H -1.246131063 1.963086724 2.894243240  
H -4.794963360 1.951586127 1.060539842  
H -3.235368729 2.739871979 0.855269372  
H -4.038495541 0.796510994 3.082633972  
H -3.529676676 2.464727163 3.310425282  
H 1.508494496 0.239542723 -3.058830261  
H 3.282574654 -0.775567114 0.356575131  
H 3.832540751 -0.395103872 -3.341902256  
H 3.749459505 -1.565149188 -2.025741816  
H 3.406914711 1.468473911 -1.729554892  
H 4.764550209 0.531763256 -1.106729984  
H -0.794301629 1.778146863 5.203684330  
H -2.686319590 -1.528858423 3.199415684  
H -0.671565235 0.433081448 7.277114868  
H -2.563158751 -2.857218027 5.234173775  
H -1.568802238 -1.888156414 7.317937374  
H -3.916437149 -1.505335212 -1.095813870  
H -2.882057905 2.661624670 -1.364859939  
H -4.061053276 -1.627685308 -3.557182789  
H -3.007403374 2.532216549 -3.818314791  
H -3.572130680 0.385098040 -4.938126564  
H 3.467668772 2.873484850 -0.059845544  
H 1.902576923 -0.291179508 2.397406816  
H 3.034091711 4.483525276 1.751440763  
H 1.500786066 1.306193829 4.218954563  
H 2.051845789 3.724800348 3.903477907  
H -0.828397512 -1.179706097 -2.735290289  
H 3.015120029 -2.819089174 -3.796933651  
H -1.938591719 -3.096057892 -3.781943798  
H 1.891425848 -4.753486156 -4.824098110  
H -0.589734495 -4.917045116 -4.825702667  
C 1.575082779 -3.068119049 1.983808517  
C 2.965245485 -2.795885563 2.075266123  
H 3.608570576 -2.994895697 1.224564672  
C 3.509279966 -2.325529099 3.260407925  
H 4.576519489 -2.137455940 3.331765890  
C 2.684488297 -2.088889599 4.371327877  
H 3.120174408 -1.709730029 5.291833401  
H 0.668131411 -2.144345045 5.158021927  
C 1.309326291 -2.335460901 4.303667068  
C 0.758364618 -2.841943264 3.130978107  
H -0.302325875 -3.082350254 3.078807116  
C 0.954033613 -3.587516308 0.794054210

H 0.044619650 -4.148113251 0.983620405  
C 1.707958102 -4.011359692 -0.425381631  
H 1.022061467 -4.204870701 -1.252102613  
H 2.240813494 -4.949718475 -0.209332988  
H 2.449880838 -3.277364969 -0.750343621  
Cu -0.235049158 -1.776044846 0.538713694  
N -2.431359768 -3.851222754 2.020401955  
C -1.186082482 -6.026428699 -0.652900636  
C -1.722903848 -4.925793171 0.055003718  
C -0.950185299 -7.210140705 0.033123866  
H -0.975424290 -5.946276188 -1.716366053  
C -1.955867171 -5.038578987 1.474010587  
C -1.994166970 -3.567148209 -0.255510330  
C -1.212586522 -7.317227840 1.420991898  
H -0.556737661 -8.070899010 -0.499364197  
C -1.684973717 -6.228642941 2.149038315  
C -2.501636267 -3.014504671 0.989381671  
H -2.058245897 -3.121104717 -1.238803387  
H -1.021653175 -8.259796143 1.925656796  
H -1.873260379 -6.299187183 3.216822386  
H -3.002706766 -2.065145731 1.079973221

MF of H<sub>s</sub>-TS'

Cu -0.225367934 -0.640409172 -3.275611639  
H -3.287765980 0.239022851 -2.958347082  
C -2.991525173 0.164878532 -4.008861542  
C -1.566022754 0.644347548 -4.274747372  
C -1.284786224 2.067005157 -4.025138855  
C -0.376012027 2.758244276 -4.864307880  
C -1.890365720 2.827951908 -2.996723175  
C -0.073450968 4.101628304 -4.674347878  
C -1.565601230 4.169029713 -2.790973425  
C -0.649511337 4.822366238 -3.620262384  
H 0.091145538 2.208366871 -5.678743839  
H -2.639273643 2.365931273 -2.361276388  
H 0.622136235 4.593084812 -5.351623058  
H -2.049079657 4.715878010 -1.983794212  
H -0.411429375 5.871422768 -3.468255520  
H -1.304944158 0.421686471 -5.309515953  
H -3.097308159 -0.886818111 -4.292779922  
P -1.387740850 -2.107519150 -1.769847393  
C -0.324418843 -3.191905975 -0.719692111  
C 0.580032349 -2.563976526 0.194005519  
C -0.301685214 -4.581977367 -0.879331887  
C 1.438460112 -3.410557032 0.871523261  
C 0.607995868 -1.112561584 0.559981525  
C 0.599410117 -5.410557747 -0.186826944  
H -1.002571106 -5.052361012 -1.557851076  
C 1.469974279 -4.788738251 0.679166913  
O 2.375960588 -3.055171251 1.809542775  
C 0.077728279 -0.757325768 1.787873507  
C 1.195356846 -0.051650207 -0.197503909  
H 0.607145607 -6.485544682 -0.327287942  
O 2.432326555 -5.350288391 1.477882385  
C 3.097407818 -4.252434254 2.120175123  
C 0.062537178 0.547463179 2.272257566  
O -0.522172749 -1.593513489 2.696728945  
C 1.197824478 1.251419783 0.311500728  
P 1.759526610 -0.415499955 -1.919710398  
H 4.120007992 -4.170460224 1.729564786  
C 3.094270706 -4.408373356 3.204602242  
C 0.630388796 1.579331636 1.556981325  
O -0.554216802 0.585649431 3.495597601  
C -1.017053962 -0.751229763 3.743483782  
H 1.649809361 2.047635555 -0.268510073  
H 0.635978639 2.596044302 1.933432102  
H -0.626060784 -1.098821282 4.706513882  
H -2.114418745 -0.762799442 3.727979183  
C 2.814553499 1.008071423 -2.413791180  
C 4.208359718 0.943529129 -2.570273161  
C 2.153195858 2.203532457 -2.743374109  
C 4.922836781 2.058154821 -3.013914824  
H 4.743046284 0.025304545 -2.353624105

C 2.874154329 3.321431875 -3.161710739  
H 1.070171833 2.258233547 -2.691142559  
C 4.262199879 3.254368305 -3.298058748  
C 2.961827040 -1.783753276 -1.647360206  
C 2.871776581 -2.952230930 -2.416358709  
C 3.959451437 -1.689067960 -0.662928641  
C 3.779591322 -3.995286226 -2.218351126  
H 2.077932835 -3.064517736 -3.147220373  
C 4.871574879 -2.727305889 -0.477759123  
H 4.015078068 -0.802184701 -0.038171511  
C 4.784219265 -3.885722160 -1.256139278  
C -2.317340612 -1.143084526 -0.517174363  
C -2.226512194 -0.9524041255 -0.570867658  
C -3.052203417 -1.743366718 0.515004396  
C -2.879249096 1.043245554 0.373863935  
H -1.616690040 0.715933800 -1.340397835  
C -3.717907906 -0.952884614 1.452443123  
H -3.097338676 -2.826500654 0.587016284  
C -3.633201838 0.440878302 1.382804513  
C -2.611881733 -3.231709003 -2.550123215  
C -2.137506485 -4.123642921 -3.529605627  
C -3.991035461 -3.174152613 -2.303066969  
C -3.012150764 -4.968504906 -4.211620808  
H -1.084672093 -4.137961864 -3.786798954  
C -4.867172718 -4.006601334 -3.002380848  
H -4.388828278 -2.473869324 -1.576865435  
C -4.382868290 -4.910552979 -3.948804617  
H -3.732673168 0.738831997 -4.589735031  
H -2.615680456 -5.653172493 -4.956475735  
H -5.070513248 -5.557521820 -4.486964703  
H -5.934049129 -3.945173025 -2.803978682  
H -4.298470497 -1.424812913 2.241110325  
H -4.145527363 1.054092765 2.119274616  
H -2.787466764 2.124392033 0.323847115  
H 2.335648298 4.232270718 -3.400804996  
H 4.822177887 4.121437073 -3.637614727  
H 6.000894070 1.987490892 -3.134592295  
H 5.648088455 -2.63316517 0.277384788  
H 5.490767002 -4.698061466 -1.109071374  
H 3.695280075 -4.897756100 -2.815048456

=====  
SF of  $\Pi_s$ -TS'  
=====

C -1.135896087 -7.945042610 -6.234514236  
C -1.124826550 -7.031476498 -7.289062500  
C -0.355087608 -7.661466599 -5.107564449  
H -1.708698273 -7.244875431 -8.181900978  
H -0.326923937 -8.376249313 -4.287419796  
C -0.379315436 -5.846222401 -7.243443489  
C 0.387566537 -6.484118938 -5.003474236  
C 0.354616374 -5.561863422 -6.071314335  
C 1.055969954 -4.225040913 -5.993088722  
O 1.752868652 -3.772104502 -6.878770351  
O 0.728636146 -3.563192368 -4.862174511  
C -0.285077751 -0.323914558 -8.200492859  
C 0.391224623 -0.771864057 -7.068568707  
C -0.263982475 -1.621677160 -6.154591560  
C -1.559716105 -2.069571972 -6.350989819  
C -2.222385168 -1.630377054 -7.503755569  
C -1.595827818 -0.768055677 -8.412425041  
C 1.721158862 -0.532830954 -6.527576447  
C 1.822528839 -1.225153089 -5.369771004  
N 0.581287384 -1.837248206 -5.023423672  
H 0.190344617 0.358336210 -8.899393082  
H -2.037365913 -2.728915453 -5.637247086  
H -3.240086794 -1.960879326 -7.689260006  
H -2.137941599 -0.434051543 -9.292605400  
H 2.485481501 0.099269010 -6.960596561  
H 2.654304743 -1.320465088 -4.690282822  
C -1.953007698 -9.214097023 -6.302588463  
H -2.663625717 -9.271857262 -5.469507217  
H -2.522584200 -9.277316093 -7.234438896  
H -1.312909365 -10.102234840 -6.240034580  
C -0.385784537 -4.923728466 -8.441552162

H 0.618897438 -4.832370758 -8.862243652  
H -1.061725616 -5.302425861 -9.213601112  
H -0.700963795 -3.911104441 -8.175846100  
C 1.245124459 -6.243788719 -3.782419920  
H 0.911992550 -5.379168987 -3.204405069  
H 1.242656589 -7.115897655 -3.122560740  
H 2.282502890 -6.050940990 -4.077297688

=====  
MF of  $\Pi_s$ -TS  
=====

Cu -2.243358135 0.947758377 -4.128157616  
H -5.454327583 0.836856008 -4.336148739  
C -5.045289993 1.490248680 -5.111362934  
C -3.784198284 2.209934950 -4.666051865  
C -3.859062433 3.000041962 -3.427607059  
C -2.977535725 4.099092007 -3.235530615  
C -4.794065475 2.746393681 -2.392783880  
C -3.016028166 4.877756119 -2.084095001  
C -4.840610504 3.541522264 -1.248423696  
C -3.951872110 4.607666016 -1.076124787  
H -2.300059319 4.356111526 -4.043592930  
H -5.487143517 1.914962530 -2.487394571  
H -2.343202829 5.728693485 -1.994670630  
H -5.573534966 3.319497585 -0.475164562  
H -3.998761892 5.227835178 -0.184075251  
H -3.336556196 2.792867184 -5.469541073  
H -4.851037979 0.875150383 -5.992285728  
P -2.782873154 -0.570287228 -2.227044106  
C -1.654040694 -2.031051159 -2.148486614  
C -0.318026364 -1.859830737 -1.667411447  
C -2.051546097 -3.265728235 -2.677314281  
C 0.502237380 -2.971558809 -1.751019120  
C 0.252250046 -0.635700226 -1.029461980  
C -1.185464621 -4.370670795 -2.760110855  
H -3.069360018 -3.388992786 -3.029481173  
C 0.097130552 -4.187343597 -2.292132854  
O 1.812674761 -3.058447361 -1.351022720  
C 0.552049637 -0.690110624 0.319696695  
C 0.603762388 0.576713920 -1.696685076  
H -1.510082960 -5.320704937 -3.169774771  
O 1.135089040 -5.082629204 -2.258366346  
C 2.268985748 -4.349366665 -1.770588279  
C 1.127203584 0.364861220 1.021330953  
O 0.327263147 -1.742487907 1.171103001  
C 1.194663167 1.625169158 -0.981516540  
P 0.190870956 0.760078013 -3.486068249  
H 2.999655962 -4.228572369 -2.581605673  
H 2.705003262 -4.878037930 -0.915750206  
C 1.469063044 1.542191505 0.394462973  
O 1.283226609 0.019846981 2.337973595  
C 0.704004526 -1.286120415 2.475387573  
H 1.462130427 2.538751125 -1.497899294  
H 1.926723599 2.362432718 0.935936034  
H 1.445773363 -1.971517682 2.901853323  
H -0.189147562 -1.221427321 3.110421658  
C 1.106587648 2.270674467 -3.977610111  
C 2.310628653 2.298912525 -4.694329262  
C 0.470832020 3.483188868 -3.656116486  
C 2.873863935 3.522890806 -5.065998077  
H 2.801388264 1.375570536 -4.984907627  
C 1.036899805 4.702370644 -4.020861149  
H -0.482767165 3.469367504 -3.135311127  
C 2.243356466 4.722565691 -4.728609085  
C 1.078019381 -0.677102864 -4.214342594  
C 0.343868971 -1.580483794 -4.996605873  
C 2.424783468 -0.954936743 -3.935705185  
C 0.947505951 -2.725151062 -5.515532017  
H -0.718988955 -1.413850784 -5.147446632  
C 3.033581495 -2.090976000 -4.469074249  
H 2.985631704 -0.298453659 -3.276361227  
C 2.297602654 -2.975224257 -5.262917519  
C -2.680911779 0.095495664 -0.522487581  
C -2.450248003 1.466993213 -0.357248843  
C -2.752274990 -0.733175695 0.610301495



C -2.307203054 2.006384373 0.921858072  
H -2.377654791 2.111729145 -1.226287484  
C -2.625942945 -0.188346997 1.887146831  
H -2.879586458 -1.805582762 0.490736097  
C -2.399159908 1.182839036 2.044569731  
C -4.454613686 -1.304661274 -2.391539097  
C -4.858294487 -1.634589076 -3.697752953  
C -5.348620892 -1.514126182 -1.330871701  
C -6.111127853 -2.199553490 -3.933740139  
H -4.193823814 -1.417939782 -4.532884598  
C -6.609202385 -2.064150333 -1.571462512  
H -5.071114063 -1.236624241 -0.318920225  
C -6.989025116 -2.417244673 -2.868315935  
H -5.839618206 2.206186533 -5.383438587  
H -6.409533024 -2.447680473 -4.949334621  
H -7.971660614 -2.845297813 -3.050464869  
H -7.295876980 -2.215430260 -0.741546154  
H -2.696537971 -0.834286273 2.759374857  
H -2.286353588 1.604002714 3.040416002  
H -2.128936052 3.072028160 1.030732870  
H 0.517313361 5.628833294 -3.789197445  
H 2.678361893 5.670346260 -5.034311771  
H 3.804248571 3.535905600 -5.629527569  
H 4.080362797 -2.292109966 -4.256031036  
H 2.770999193 -3.864790916 -5.669872761  
H 0.361432582 -3.424837112 -6.104445457

=====  
SF of  $\Pi_s$ -TS  
=====

C -2.217523336 8.621003151 -3.697443724  
C -1.126302242 8.314389229 -4.526375771  
C -3.436906338 7.976104736 -3.934424639  
H -0.177193716 8.829212189 -4.371520519  
H -4.295362473 8.209068298 -3.304334641  
C -1.226342559 7.366901398 -5.549651623  
C -3.583261013 7.024502754 -4.953903675  
C -2.464925051 6.722043991 -5.751651764  
C -2.565639019 5.646946907 -6.821142197  
O -3.133205891 5.792104244 -7.893986225  
O -1.948027968 4.583721638 -6.355744362  
C -3.155797720 0.111675754 -7.833762169  
C -2.294358969 1.150107741 -7.496131420  
C -2.550225973 2.465711594 -7.954411983  
C -3.696002722 2.785571098 -8.669532776  
C -4.577460289 1.736664176 -8.975018501  
C -4.302162170 0.420083970 -8.583624840  
C -1.047228336 1.236366391 -6.738349438  
C -0.592783630 2.530791044 -6.880033493  
N -1.445275307 3.296747446 -7.642566681  
H -2.944446564 -0.913148701 -7.533792019  
H -3.885377407 3.818273544 -8.944736481  
H -5.485466003 1.949829340 -9.533448219  
H -4.994555950 -0.374232322 -8.854042053  
H -0.467120409 0.390915543 -6.400495529  
H 0.316787124 2.969095230 -6.498388767  
C -2.062387466 9.602464676 -2.555048704  
H -1.605086684 9.122124672 -1.678984404  
H -1.415305495 10.443428040 -2.832482100  
H -3.029469967 10.007470131 -2.236737251  
C -0.045673881 7.053543091 -6.442589760  
H 0.833448231 7.647607803 -6.164748192  
H 0.211166039 5.991415501 -6.387116909  
H -0.283987403 7.267558575 -7.492959023  
C -4.902655125 6.325357914 -5.194417000  
H -4.793979645 5.240412235 -5.076537132  
H -5.668220997 6.667191029 -4.490073681  
H -5.253054619 6.504903316 -6.216828823

=====  
MF of  $\Pi_r$ -TS'  
=====

P 1.097514868 -0.559144616 -0.919190943  
C 0.795758069 1.208102107 -1.434713244  
C -0.065575913 2.009594917 -0.440777838

P -1.457924962 1.056273341 0.373810202  
C -2.944852829 1.238459110 -0.812577665  
C -2.112553120 2.411374569 1.538310170  
C -3.737152576 2.466042280 -0.319718480  
C -3.618761301 2.524439573 1.207071662  
C 1.967608929 -1.255334020 -2.448110819  
C 2.703383207 -0.517477095 0.101212859  
C 3.273719549 -1.873427391 -1.890554190  
C 3.839130640 -0.864042461 -0.883024931  
C -1.798710346 2.254671335 3.005655050  
C -1.104496479 3.262405157 3.688748598  
C -2.229370832 1.133415341 3.729140759  
C -0.861629784 3.164500713 5.060571194  
C -1.997839808 1.036440849 5.099529266  
C -1.313089252 2.052263021 5.772625446  
C -2.578006744 1.198596835 -2.283378124  
C -2.032783031 0.015850060 -2.817620993  
C -2.759223461 2.288539886 -3.146090269  
C -1.689569116 -0.076887369 -4.164026737  
C -2.414699316 2.199337006 -4.500075340  
C -1.879338861 1.019680262 -5.014547348  
C 2.829806089 0.743574679 0.927217364  
C 3.586597204 1.852061033 0.523811698  
C 2.096191883 0.838748217 2.122188807  
C 3.606419802 3.021070004 1.290615678  
C 2.116519213 2.000890017 2.889478683  
C 2.870454073 3.101913452 2.473673105  
C 1.150147796 -2.189276695 -3.311541796  
C 1.285633922 -2.141711712 -4.706408024  
C 0.273951530 -3.134194136 -2.757962227  
C 0.561035872 -3.005327702 -5.529559612  
C -0.452563524 -3.998468637 -3.577771425  
C -0.315631002 -3.935118198 -4.967272282  
H 0.286706328 1.138196349 -2.400213718  
H 1.751963615 1.719367385 -1.592737913  
H 0.555640459 2.359970570 0.390984058  
H -0.483664542 2.891992569 -0.940123975  
H -3.534454823 0.337754220 -0.620934129  
H -1.639947295 3.337156296 1.185182452  
H -4.778336048 2.419535398 -0.661224008  
H -3.305874825 3.388186932 -0.727810800  
H -4.172572136 1.703649640 1.677012920  
H -4.028139591 3.454099655 1.619825482  
H 2.251221895 -0.384565592 -3.054337740  
H 2.581256628 -1.354672551 0.794300079  
H 3.973484993 -2.090748072 -2.706020832  
H 3.048718452 -2.827210665 -1.396305919  
H 4.165779591 0.028443586 -1.430597186  
H 4.714005947 -1.249865174 -0.346811414  
H -0.751214743 4.133224487 3.140427589  
H -2.741220474 0.325060040 3.218671560  
H -0.322892338 3.959082365 5.571749210  
H -2.343366861 0.157760739 5.638503075  
H -1.129842281 1.975728750 6.841107845  
H -1.880174756 -0.837289631 -2.165889502  
H -3.194320440 3.213648081 -2.779986858  
H -1.268471837 -1.002952933 -4.545620918  
H -2.572535515 3.058185816 -5.150944233  
H -1.615077615 0.951165378 -6.067549706  
H 4.171074867 1.814789772 -0.391135246  
H 1.495769739 -0.000962132 2.449572802  
H 4.200929642 3.869084358 0.958827198  
H 1.533958912 2.041538715 3.804897308  
H 2.887572765 4.012227535 3.068146229  
H 1.959202409 -1.412276626 -5.151992321  
H 0.150212586 -3.174145699 -1.680546045  
H 0.675347626 -2.945852041 -6.609421253  
H -1.131700158 -4.723832607 -3.136111021  
H -0.889267623 -4.602976322 -5.604075432  
C 0.753153086 -2.406432152 2.848875761  
C 2.146453142 -2.579854012 3.018432140  
H 2.708700418 -3.163349628 2.295493364  
C 2.823168516 -2.022977114 4.104898930  
H 3.897451878 -2.167780161 4.195854664  
C 2.136247873 -1.287407517 5.069801331

H 2.665635586 -0.847136736 5.910346508  
H 0.200413346 -0.540817976 5.669814587  
C 0.751443326 -1.119947791 4.934458256  
C 0.077511162 -1.665846348 3.849928379  
H -0.991639972 -1.504722238 3.733704567  
C 0.002034192 -2.952872038 1.707489729  
H -0.958955526 -3.345334530 2.049116850  
C 0.744785309 -3.982131004 0.866093278  
H 0.069293432 -4.465417862 0.157541633  
H 1.196636915 -4.779232979 1.480033755  
H 1.562473536 -3.537448168 0.283825696  
Cu -0.723907650 -1.349559426 0.530492187

=====  
SF of  $\Pi_p$ -TS'  
=====

C -5.930175781 -1.159552455 -4.882779121  
C -6.941804409 -0.228960276 -4.615285873  
H -5.623552322 -1.332061291 -5.914062977  
C -5.290955067 -1.865723014 -3.858184338  
C -7.319998264 -0.014535896 -3.283088207  
C -5.701135635 -1.633148313 -2.532740831  
H -8.102010727 0.711429477 -3.060783386  
C -6.714113712 -0.703659415 -2.229115248  
C -5.002838135 -2.332342863 -1.389473796  
O -5.485211372 -3.198105574 -0.686156809  
O -3.795216084 -1.782765985 -1.281542778  
N -2.696113586 -2.335818052 0.012296468  
C -4.103980064 -3.884889364 2.983101368  
C -3.479003906 -3.651715279 1.759246469  
C -4.730436802 -2.812494278 3.629152536  
H -4.117094517 -4.879279137 3.420539618  
C -3.443085670 -2.344312429 1.232649803  
C -2.820689440 -4.500400066 0.778455675  
C -4.741293907 -1.532017231 3.059840441  
H -5.230163097 -2.978693962 4.579729080  
C -4.091590881 -1.285511971 1.845251560  
C -2.425652504 -3.704859257 -0.246009588  
H -2.663710356 -5.567576885 0.860859156  
H -5.253876686 -0.718783498 3.566344738  
H -4.109388828 -0.307979345 1.383061528  
H -1.931620717 -3.952447891 -1.170753121  
C -4.180278301 -2.847609997 -4.161909103  
H -4.094736099 -3.028115749 -5.238998890  
H -3.216947079 -2.472640991 -3.800327063  
H -4.359652042 -3.810314655 -3.666885376  
C -7.106694221 -0.441699028 -0.791239858  
H -7.336849689 -1.375305891 -0.269145072  
H -6.279460907 0.025681041 -0.239732102  
H -7.972607136 0.224986821 -0.728274822  
C -7.634313107 0.512474179 -5.737074375  
H -7.898195744 1.533419013 -5.438867092  
H -7.003353119 0.571018219 -6.631148338  
H -8.566912651 0.009645576 -6.025473595

=====  
MF of  $\Pi_p$ -TS  
=====

P 1.552207589 -0.433497280 -0.347039580  
C 0.803309798 1.114454269 -1.103900790  
C -0.413246989 1.689554095 -0.359916091  
P -1.732558250 0.462177217 0.127420425  
C -2.993044853 0.584953010 -1.283405542  
C -2.783313751 1.533219576 1.280158162  
C -3.850874662 1.816473365 -0.948501706  
C -4.141287804 1.727272391 0.553770185  
C 3.046311140 -0.634564102 -1.534865975  
C 2.665996313 0.248764455 1.041304946  
C 4.300409794 -0.413844317 -0.662221134  
C 3.966033459 0.687271118 0.348897904  
C -2.917335510 1.117779493 2.731684446  
C -3.287245274 2.108104706 3.655644417  
C -2.699557781 -0.182210907 3.198663473  
C -3.430841684 1.810173750 5.008289814  
C -2.830334663 -0.482427537 4.554875851

C -3.197477579 0.509025753 5.463389874  
C -2.338809729 0.496341139 -2.640368223  
C -1.802113295 -0.736021698 -3.051223278  
C -2.198143482 1.598429441 -3.492756844  
C -1.157067060 -0.870641172 -4.277210712  
C -1.545827508 1.469038725 -4.722750187  
C -1.023548961 0.237538517 -5.120234013  
C 1.961767077 1.237346292 1.938021541  
C 2.184928894 2.618555546 1.865039229  
C 1.001632214 0.758530200 2.846678495  
C 1.455304980 3.501287222 2.666934490  
C 0.281744242 1.636963964 3.653418779  
C 0.499995917 3.015324593 3.559444666  
C 2.976147175 -1.908006310 -2.346964598  
C 2.240452766 -1.902967572 -3.544569969  
C 3.560265064 -3.114610195 -1.932448149  
C 2.082707644 -3.064073801 -4.298612595  
C 3.409330845 -4.279600620 -2.689300299  
C 2.666675806 -4.261471748 -3.872558594  
H 0.518914819 0.822543502 -2.122245073  
H 1.565896988 1.898106694 -1.194422722  
H -0.090658374 2.148244619 0.577509940  
H -0.876209199 2.479232073 -0.964858532  
H -3.634119272 -0.294195771 -1.152063131  
H -2.273350239 2.504566431 1.266123414  
H -4.764430523 1.837254763 -1.552950382  
H -3.303220272 2.744328976 -1.157833695  
H -4.799998283 0.875475585 0.761832654  
H -4.648881912 2.619228363 0.936626852  
H 2.972990274 0.211550355 -2.229857206  
H 2.882881880 -0.647310972 1.636635900  
H 5.165882587 -0.165924370 -1.287624240  
H 4.555555820 -1.326739669 -0.111502595  
H 3.826379061 1.637923956 -0.1816665435  
H 4.771040916 0.842143238 1.077731371  
H -3.451120615 3.126257181 3.306881428  
H -2.405833960 -0.973902941 2.519104958  
H -3.714695215 2.593870163 5.706271648  
H -2.649181128 -1.495078444 4.892431736  
H -3.297613144 0.264030516 6.516914368  
H -1.887423754 -1.593284249 -2.389307976  
H -2.608724594 2.563753605 -3.210309982  
H -0.754136384 -1.837346554 -4.567271233  
H -1.451126695 2.335479021 -5.372612000  
H -0.521916449 0.137965560 -6.078860760  
H 2.925835848 3.017037630 1.178926826  
H 0.816562414 -0.309126616 2.918729544  
H 1.637355566 4.570724487 2.591433287  
H -0.458177596 1.246367216 4.344375134  
H -0.071687490 3.700727463 4.179358006  
H 1.777111650 -0.976964891 -3.880061626  
H 4.131982803 -3.160454035 -1.008180737  
H 1.508028984 -3.035802603 -5.223772049  
H 3.868977070 -5.204275608 -2.345876932  
H 2.545999050 -5.169302940 -4.457935810  
C 0.408840895 -3.187856674 2.267024279  
C 1.816830277 -3.045451641 2.305877924  
H 2.398613691 -3.254272223 1.412668705  
C 2.469108105 -2.645597219 3.472164631  
H 3.553382397 -2.551784039 3.472402573  
C 1.748127699 -2.368752718 4.637181759  
H 2.261749983 -2.054358721 5.541287899  
H -0.227583826 -2.309749603 5.521079540  
C 0.353571177 -2.507287264 4.624217987  
C -0.300663531 -2.912974358 3.467065334  
H -1.381442189 -3.032453537 3.465940952  
C -0.330547065 -3.582618952 1.057212710  
H -1.254238486 -4.103661537 1.310894370  
C 0.447841853 -4.275262356 -0.050849479  
H -0.221410096 -4.568386555 -0.864404082  
H 0.950850308 -5.189989090 0.305995077  
H 1.219347835 -3.633003712 -0.486955106  
Cu -0.844205499 -1.710446954 0.479010552

SF of  $\Pi_p$ -TS

|   |              |              |              |
|---|--------------|--------------|--------------|
| N | -4.768986225 | -3.335892439 | 1.680386543  |
| C | -2.980148315 | -5.301344395 | -0.791842520 |
| C | -3.483404160 | -4.263678551 | -0.016624460 |
| C | -3.243602037 | -6.618695259 | -0.385598898 |
| H | -2.402424097 | -5.103729248 | -1.689900756 |
| C | -4.284210205 | -4.544749737 | 1.112038374  |
| C | -3.415002108 | -2.808472395 | -0.086557373 |
| C | -4.017158031 | -6.882583141 | 0.748252153  |
| H | -2.846132517 | -7.445823669 | -0.967177629 |
| C | -4.564873695 | -5.840340137 | 1.513513327  |
| C | -4.190054417 | -2.325780153 | 0.952174544  |
| H | -3.041283369 | -2.249433041 | -0.929583430 |
| H | -4.207151890 | -7.911986828 | 1.038844347  |
| H | -5.175204277 | -6.015313148 | 2.392491579  |
| H | -4.398271561 | -1.299417496 | 1.216659784  |
| O | -3.829151392 | -3.307559013 | 3.331943512  |
| C | -4.474554539 | -3.949291945 | 4.283363819  |
| O | -5.581092834 | -4.459529400 | 4.232806206  |
| C | -3.596441507 | -3.962373257 | 5.522679329  |
| C | -3.947838783 | -3.135340214 | 6.612766743  |
| C | -2.430060387 | -4.744177341 | 5.550232887  |
| C | -3.087440968 | -3.079918623 | 7.709363937  |
| C | -1.604409695 | -4.668272495 | 6.681559563  |
| C | -1.901383996 | -3.830389500 | 7.756261826  |
| H | -3.342137575 | -2.433793068 | 8.548764229  |
| H | -0.691705167 | -5.260409355 | 6.703454494  |
| C | -2.077928066 | -5.689436913 | 4.423100471  |
| H | -0.997352600 | -5.855182648 | 4.377315998  |
| H | -2.565927744 | -6.660230637 | 4.577355862  |
| H | -2.401928425 | -5.309556961 | 3.450954437  |
| C | -5.220114231 | -2.321148872 | 6.573089123  |
| H | -6.086107731 | -2.967698336 | 6.402627945  |
| H | -5.365599155 | -1.768750072 | 7.506530762  |
| H | -5.195684910 | -1.596133351 | 5.750495434  |
| C | -0.976708174 | -3.715149641 | 8.946225166  |
| H | -0.681789517 | -2.671850681 | 9.117812157  |
| H | -1.465137124 | -4.064379215 | 9.864324570  |
| H | -0.063762590 | -4.303373337 | 8.806899071  |

**Table S6. Vibrational Frequencies (in cm<sup>-1</sup>) of the Optimized Geometries**

|                                                                |  |  |  |  |  |                      |         |         |         |         |         |
|----------------------------------------------------------------|--|--|--|--|--|----------------------|---------|---------|---------|---------|---------|
| Styrene                                                        |  |  |  |  |  | 24.76                | 38.22   | 58.29   | 102.39  | 166.82  | 208.58  |
|                                                                |  |  |  |  |  | 224.24               | 247.80  | 263.21  | 310.76  | 349.67  | 415.60  |
|                                                                |  |  |  |  |  | 434.10               | 454.36  | 471.41  | 496.82  | 556.47  | 587.77  |
|                                                                |  |  |  |  |  | 595.59               | 613.31  | 630.80  | 644.39  | 707.02  | 717.72  |
|                                                                |  |  |  |  |  | 731.23               | 753.96  | 775.33  | 781.28  | 793.13  | 810.62  |
|                                                                |  |  |  |  |  | 857.25               | 861.90  | 864.64  | 894.90  | 928.34  | 934.28  |
|                                                                |  |  |  |  |  | 971.17               | 979.15  | 997.78  | 1003.39 | 1016.38 | 1033.47 |
|                                                                |  |  |  |  |  | 1043.51              | 1058.62 | 1081.43 | 1101.55 | 1118.60 | 1137.53 |
|                                                                |  |  |  |  |  | 1157.00              | 1191.10 | 1197.82 | 1222.27 | 1228.69 | 1233.54 |
|                                                                |  |  |  |  |  | 1246.84              | 1323.35 | 1337.67 | 1349.46 | 1369.84 | 1382.28 |
|                                                                |  |  |  |  |  | 1392.04              | 1395.76 | 1422.85 | 1447.71 | 1494.03 | 1501.45 |
|                                                                |  |  |  |  |  | 1508.08              | 1517.41 | 1524.41 | 1543.06 | 1569.21 | 1627.49 |
|                                                                |  |  |  |  |  | 1644.53              | 1666.14 | 1668.93 | 3042.01 | 3052.82 | 3130.12 |
|                                                                |  |  |  |  |  | 3138.49              | 3173.83 | 3175.63 | 3182.46 | 3182.48 | 3192.80 |
|                                                                |  |  |  |  |  | 3192.88              | 3203.75 | 3204.11 | 3211.78 | 3254.04 | 3280.04 |
| 1 <i>H</i> -indol-1 <i>yl</i> trimethylbenzoate                |  |  |  |  |  | <b>4a</b>            |         |         |         |         |         |
|                                                                |  |  |  |  |  | 32.03                | 44.61   | 56.98   | 119.31  | 161.87  | 199.14  |
|                                                                |  |  |  |  |  | 225.36               | 251.49  | 293.00  | 313.05  | 331.12  | 388.14  |
|                                                                |  |  |  |  |  | 416.66               | 432.32  | 436.33  | 472.54  | 496.30  | 543.18  |
|                                                                |  |  |  |  |  | 586.96               | 588.95  | 632.49  | 635.81  | 661.18  | 703.36  |
|                                                                |  |  |  |  |  | 717.42               | 755.93  | 773.53  | 780.58  | 787.17  | 794.42  |
|                                                                |  |  |  |  |  | 815.33               | 861.07  | 861.60  | 888.75  | 927.89  | 936.21  |
|                                                                |  |  |  |  |  | 975.90               | 976.20  | 981.24  | 997.55  | 1016.76 | 1042.58 |
|                                                                |  |  |  |  |  | 1049.82              | 1069.33 | 1079.21 | 1110.44 | 1115.70 | 1133.02 |
|                                                                |  |  |  |  |  | 1163.36              | 1189.95 | 1196.15 | 1215.85 | 1223.05 | 1234.68 |
|                                                                |  |  |  |  |  | 1278.25              | 1305.21 | 1325.95 | 1343.03 | 1362.05 | 1368.78 |
|                                                                |  |  |  |  |  | 1388.84              | 1391.07 | 1422.76 | 1458.08 | 1490.39 | 1496.75 |
|                                                                |  |  |  |  |  | 1515.14              | 1518.18 | 1536.50 | 1541.37 | 1605.20 | 1632.33 |
|                                                                |  |  |  |  |  | 1641.56              | 1664.10 | 1678.51 | 3010.30 | 3046.83 | 3120.27 |
|                                                                |  |  |  |  |  | 3128.92              | 3170.63 | 3175.12 | 3178.10 | 3185.28 | 3188.44 |
|                                                                |  |  |  |  |  | 3198.62              | 3199.96 | 3209.48 | 3209.69 | 3256.74 | 3692.94 |
| C3-substituted 1 <i>H</i> -indol-1 <i>yl</i> trimethylbenzoate |  |  |  |  |  | <b>I<sub>s</sub></b> |         |         |         |         |         |
|                                                                |  |  |  |  |  | 17.75                | 23.72   | 30.32   | 31.59   | 38.72   | 39.89   |
|                                                                |  |  |  |  |  | 42.30                | 45.90   | 51.24   | 51.90   | 61.25   | 63.79   |
|                                                                |  |  |  |  |  | 69.27                | 73.35   | 92.77   | 98.28   | 107.97  | 112.63  |
|                                                                |  |  |  |  |  | 118.29               | 125.52  | 132.60  | 142.04  | 155.58  | 174.29  |
|                                                                |  |  |  |  |  | 185.35               | 190.30  | 203.89  | 218.27  | 220.43  | 230.07  |
|                                                                |  |  |  |  |  | 235.83               | 250.20  | 257.39  | 259.33  | 306.69  | 315.18  |
|                                                                |  |  |  |  |  | 320.76               | 331.58  | 343.88  | 350.95  | 365.43  | 407.91  |
|                                                                |  |  |  |  |  | 410.18               | 412.47  | 419.34  | 420.53  | 420.88  | 437.65  |
|                                                                |  |  |  |  |  | 438.37               | 461.58  | 468.39  | 474.87  | 476.59  | 503.42  |
|                                                                |  |  |  |  |  | 516.52               | 519.68  | 524.35  | 550.78  | 578.32  | 597.11  |
|                                                                |  |  |  |  |  | 624.70               | 626.60  | 629.27  | 629.97  | 632.55  | 633.40  |
|                                                                |  |  |  |  |  | 643.98               | 697.12  | 701.74  | 709.34  | 710.08  | 710.34  |
|                                                                |  |  |  |  |  | 711.36               | 714.36  | 715.40  | 718.45  | 719.86  | 736.64  |
|                                                                |  |  |  |  |  | 755.14               | 758.37  | 763.38  | 763.77  | 767.86  | 770.95  |
|                                                                |  |  |  |  |  | 772.94               | 825.32  | 825.98  | 865.31  | 867.84  | 869.98  |
|                                                                |  |  |  |  |  | 870.50               | 871.99  | 894.53  | 908.18  | 938.12  | 939.34  |
|                                                                |  |  |  |  |  | 940.06               | 941.43  | 943.19  | 945.75  | 973.44  | 976.69  |
|                                                                |  |  |  |  |  | 986.29               | 987.44  | 988.21  | 990.52  | 1004.85 | 1006.33 |
|                                                                |  |  |  |  |  | 1009.39              | 1012.36 | 1014.80 | 1015.06 | 1017.44 | 1019.24 |
|                                                                |  |  |  |  |  | 1031.83              | 1049.52 | 1052.04 | 1053.27 | 1054.77 | 1074.56 |
|                                                                |  |  |  |  |  | 1090.15              | 1108.12 | 1108.87 | 1114.44 | 1114.94 | 1121.09 |
|                                                                |  |  |  |  |  | 1121.45              | 1123.44 | 1124.73 | 1133.22 | 1137.01 | 1143.58 |
|                                                                |  |  |  |  |  | 1144.81              | 1156.27 | 1197.32 | 1197.58 | 1199.03 | 1199.78 |
|                                                                |  |  |  |  |  | 1200.09              | 1208.78 | 1210.98 | 1212.02 | 1217.47 | 1219.82 |
|                                                                |  |  |  |  |  | 1227.74              | 1229.84 | 1272.17 | 1285.56 | 1297.91 | 1326.89 |
|                                                                |  |  |  |  |  | 1327.35              | 1331.20 | 1332.96 | 1361.01 | 1361.79 | 1366.67 |
|                                                                |  |  |  |  |  | 1368.29              | 1371.26 | 1377.14 | 1442.75 | 1445.58 | 1465.83 |
|                                                                |  |  |  |  |  | 1476.08              | 1476.82 | 1477.86 | 1478.54 | 1482.68 | 1497.40 |
|                                                                |  |  |  |  |  | 1503.63              | 1523.71 | 1524.28 | 1528.29 | 1529.65 | 1552.67 |
|                                                                |  |  |  |  |  | 1553.12              | 1611.52 | 1626.59 | 1628.46 | 1628.95 | 1630.82 |
|                                                                |  |  |  |  |  | 1644.97              | 1646.05 | 1646.33 | 1646.76 | 1647.67 | 1650.17 |
|                                                                |  |  |  |  |  | 1670.78              | 1673.86 | 3005.16 | 3008.08 | 3093.98 | 3098.09 |
|                                                                |  |  |  |  |  | 3160.75              | 3167.62 | 3169.67 | 3171.29 | 3173.67 | 3175.50 |
|                                                                |  |  |  |  |  | 3178.08              | 3178.75 | 3188.58 | 3189.21 | 3189.96 | 3190.32 |
|                                                                |  |  |  |  |  | 3198.17              | 3199.31 | 3203.19 | 3203.35 | 3205.77 | 3205.97 |
|                                                                |  |  |  |  |  | 3209.52              | 3209.86 | 3210.49 | 3214.74 | 3224.80 | 3225.33 |
| Trimethylbenzoate                                              |  |  |  |  |  | <b>3a</b>            |         |         |         |         |         |
|                                                                |  |  |  |  |  | 58.06                | 69.95   | 78.97   | 132.45  | 151.18  | 169.49  |
|                                                                |  |  |  |  |  | 232.86               | 234.67  | 241.72  | 297.15  | 314.36  | 351.72  |
|                                                                |  |  |  |  |  | 428.87               | 504.69  | 520.24  | 535.61  | 577.64  | 597.67  |
|                                                                |  |  |  |  |  | 605.13               | 730.21  | 798.88  | 806.06  | 862.76  | 874.24  |
|                                                                |  |  |  |  |  | 957.46               | 974.87  | 1035.38 | 1043.76 | 1057.67 | 1061.09 |
|                                                                |  |  |  |  |  | 1065.17              | 1066.20 | 1112.72 | 1210.19 | 1275.24 | 1311.39 |
|                                                                |  |  |  |  |  | 1340.97              | 1376.61 | 1412.71 | 1416.35 | 1420.66 | 1450.26 |
|                                                                |  |  |  |  |  | 1467.85              | 1474.58 | 1478.96 | 1500.31 | 1508.20 | 1517.88 |
|                                                                |  |  |  |  |  | 1526.49              | 1614.95 | 1655.81 | 1733.62 | 3004.27 | 3021.60 |
|                                                                |  |  |  |  |  | 3022.77              | 3058.77 | 3079.35 | 3080.69 | 3090.70 | 3122.10 |
|                                                                |  |  |  |  |  | 3125.50              | 3131.99 | 3133.17 |         |         |         |

**IX<sub>s</sub>**

|         |         |         |         |         |         |
|---------|---------|---------|---------|---------|---------|
| 3.15    | 17.67   | 22.24   | 29.09   | 29.81   | 32.52   |
| 34.54   | 37.27   | 40.12   | 41.24   | 47.07   | 49.72   |
| 52.99   | 57.77   | 66.74   | 68.20   | 73.05   | 74.04   |
| 75.71   | 82.27   | 84.84   | 91.49   | 101.41  | 113.22  |
| 115.82  | 116.46  | 124.74  | 133.39  | 139.18  | 148.48  |
| 159.40  | 164.58  | 174.44  | 176.58  | 181.94  | 187.74  |
| 190.07  | 202.33  | 210.70  | 216.75  | 228.17  | 228.73  |
| 236.83  | 238.89  | 249.97  | 252.36  | 254.08  | 259.56  |
| 272.15  | 295.90  | 305.34  | 312.05  | 330.75  | 335.63  |
| 339.01  | 351.27  | 403.43  | 407.76  | 410.97  | 414.38  |
| 418.72  | 420.55  | 422.07  | 437.40  | 442.35  | 459.41  |
| 464.03  | 465.36  | 482.09  | 482.73  | 506.88  | 514.46  |
| 515.53  | 523.26  | 524.91  | 528.59  | 535.53  | 550.56  |
| 572.60  | 576.43  | 596.69  | 605.26  | 623.98  | 624.71  |
| 626.69  | 627.73  | 628.75  | 631.00  | 631.83  | 637.89  |
| 697.25  | 700.22  | 707.63  | 709.55  | 712.19  | 712.87  |
| 716.98  | 717.39  | 720.12  | 721.60  | 733.42  | 735.75  |
| 755.00  | 759.44  | 762.80  | 764.53  | 767.11  | 768.72  |
| 773.58  | 809.29  | 826.37  | 826.65  | 837.10  | 860.41  |
| 867.49  | 868.53  | 874.45  | 877.36  | 882.37  | 892.03  |
| 896.27  | 905.97  | 938.51  | 940.50  | 940.85  | 943.39  |
| 950.76  | 955.27  | 958.25  | 973.14  | 976.01  | 976.41  |
| 986.71  | 989.00  | 996.03  | 998.13  | 1006.34 | 1010.86 |
| 1010.94 | 1012.79 | 1014.15 | 1017.83 | 1028.04 | 1029.41 |
| 1036.23 | 1040.08 | 1044.29 | 1047.86 | 1051.28 | 1051.64 |
| 1051.89 | 1062.27 | 1064.61 | 1068.08 | 1069.15 | 1072.01 |
| 1089.81 | 1107.14 | 1108.26 | 1113.92 | 1115.09 | 1121.95 |
| 1123.23 | 1123.32 | 1125.96 | 1131.45 | 1134.07 | 1137.86 |
| 1142.55 | 1144.26 | 1157.19 | 1196.77 | 1196.94 | 1197.99 |
| 1198.11 | 1200.98 | 1204.52 | 1207.63 | 1211.31 | 1215.84 |
| 1218.91 | 1223.47 | 1228.98 | 1232.10 | 1273.44 | 1286.77 |
| 1286.93 | 1296.74 | 1317.50 | 1325.32 | 1325.94 | 1329.50 |
| 1330.92 | 1334.40 | 1360.06 | 1365.26 | 1367.87 | 1372.52 |
| 1374.29 | 1377.60 | 1424.63 | 1426.08 | 1426.77 | 1431.97 |
| 1445.43 | 1447.98 | 1450.65 | 1465.51 | 1473.67 | 1475.73 |
| 1477.69 | 1478.05 | 1483.22 | 1487.82 | 1493.35 | 1496.04 |
| 1496.17 | 1501.02 | 1502.92 | 1505.95 | 1514.27 | 1522.32 |
| 1526.06 | 1529.71 | 1530.06 | 1531.05 | 1554.13 | 1554.24 |
| 1595.22 | 1624.60 | 1625.40 | 1627.89 | 1628.10 | 1628.88 |
| 1643.22 | 1643.53 | 1643.90 | 1645.42 | 1645.65 | 1646.85 |
| 1660.14 | 1669.52 | 1672.72 | 3025.20 | 3029.39 | 3030.47 |
| 3036.43 | 3037.13 | 3080.84 | 3083.73 | 3083.90 | 3098.21 |
| 3099.36 | 3109.15 | 3121.33 | 3131.65 | 3148.15 | 3150.61 |
| 3162.60 | 3164.71 | 3165.23 | 3168.32 | 3170.05 | 3174.39 |
| 3175.48 | 3175.51 | 3183.57 | 3186.76 | 3188.10 | 3188.19 |
| 3193.96 | 3195.78 | 3200.15 | 3201.18 | 3201.33 | 3203.33 |
| 3206.51 | 3207.78 | 3207.99 | 3211.58 | 3223.17 | 3225.48 |

**I<sub>p</sub>**

|         |         |         |         |         |         |
|---------|---------|---------|---------|---------|---------|
| 19.31   | 23.69   | 26.54   | 44.79   | 45.87   | 47.01   |
| 49.47   | 53.36   | 58.24   | 66.02   | 85.97   | 91.86   |
| 103.65  | 105.11  | 107.09  | 114.18  | 116.76  | 144.77  |
| 158.55  | 174.83  | 181.09  | 199.57  | 223.64  | 227.82  |
| 230.71  | 239.07  | 251.45  | 271.36  | 272.21  | 280.43  |
| 304.25  | 315.09  | 340.55  | 347.44  | 353.10  | 371.30  |
| 382.02  | 415.25  | 416.43  | 423.78  | 424.73  | 438.72  |
| 474.75  | 481.89  | 491.26  | 492.22  | 508.22  | 512.86  |
| 535.09  | 536.21  | 606.28  | 607.74  | 614.31  | 625.69  |
| 631.66  | 633.18  | 633.69  | 633.99  | 644.20  | 648.23  |
| 682.01  | 682.69  | 700.81  | 701.92  | 716.44  | 717.84  |
| 721.91  | 722.59  | 770.78  | 771.57  | 783.75  | 785.79  |
| 810.92  | 838.79  | 847.73  | 857.24  | 859.04  | 863.77  |
| 864.43  | 872.19  | 872.86  | 893.61  | 911.07  | 911.46  |
| 928.23  | 929.27  | 931.73  | 932.63  | 941.53  | 942.39  |
| 976.21  | 976.77  | 978.50  | 979.01  | 999.77  | 1000.87 |
| 1002.19 | 1009.07 | 1010.40 | 1012.09 | 1013.81 | 1015.51 |
| 1016.09 | 1016.22 | 1016.56 | 1017.09 | 1020.01 | 1057.56 |
| 1057.75 | 1059.47 | 1060.11 | 1067.13 | 1068.02 | 1111.95 |
| 1112.38 | 1117.56 | 1117.97 | 1130.45 | 1146.34 | 1150.75 |
| 1173.71 | 1186.56 | 1189.26 | 1195.88 | 1195.90 | 1196.45 |
| 1196.96 | 1215.68 | 1216.12 | 1222.97 | 1223.26 | 1225.56 |

|         |         |         |         |         |         |
|---------|---------|---------|---------|---------|---------|
| 1225.61 | 1232.15 | 1232.72 | 1248.14 | 1248.89 | 1263.98 |
| 1269.64 | 1291.21 | 1301.92 | 1302.75 | 1315.28 | 1316.60 |
| 1319.88 | 1343.86 | 1344.08 | 1354.82 | 1355.40 | 1365.51 |
| 1365.79 | 1368.44 | 1368.54 | 1375.79 | 1376.72 | 1400.25 |
| 1401.43 | 1464.98 | 1478.49 | 1492.01 | 1492.62 | 1493.70 |
| 1494.32 | 1506.28 | 1506.33 | 1515.64 | 1515.99 | 1539.72 |
| 1539.85 | 1540.62 | 1540.85 | 1624.70 | 1636.12 | 1636.53 |
| 1637.07 | 1637.29 | 1659.83 | 1660.10 | 1660.50 | 1660.97 |
| 3032.75 | 3034.18 | 3036.01 | 3037.47 | 3040.43 | 3040.92 |
| 3041.93 | 3044.25 | 3045.07 | 3046.65 | 3082.47 | 3083.17 |
| 3094.23 | 3095.23 | 3096.08 | 3107.89 | 3156.05 | 3157.62 |
| 3163.32 | 3163.58 | 3168.62 | 3171.67 | 3173.60 | 3173.92 |
| 3179.99 | 3180.01 | 3189.79 | 3190.16 | 3190.78 | 3190.83 |
| 3199.10 | 3199.29 | 3202.64 | 3202.83 | 3213.74 | 3214.14 |

**IX<sub>p</sub>**

|         |         |         |         |         |         |
|---------|---------|---------|---------|---------|---------|
| 8.46    | 10.58   | 17.78   | 21.34   | 29.34   | 33.93   |
| 39.89   | 41.33   | 45.15   | 48.96   | 50.86   | 54.99   |
| 59.38   | 64.03   | 76.37   | 77.03   | 78.45   | 84.97   |
| 91.01   | 100.82  | 110.92  | 114.46  | 125.25  | 128.60  |
| 133.62  | 141.95  | 155.75  | 160.90  | 165.02  | 180.87  |
| 182.47  | 199.77  | 204.12  | 214.48  | 229.53  | 232.79  |
| 233.48  | 242.40  | 244.75  | 250.32  | 260.14  | 269.52  |
| 276.95  | 278.58  | 293.69  | 308.98  | 310.09  | 334.88  |
| 350.92  | 357.11  | 368.00  | 380.27  | 404.13  | 416.52  |
| 417.83  | 425.30  | 425.65  | 436.40  | 438.12  | 483.45  |
| 489.00  | 494.14  | 499.91  | 512.26  | 517.15  | 523.87  |
| 532.09  | 536.31  | 539.29  | 543.44  | 572.06  | 600.58  |
| 603.17  | 605.21  | 614.61  | 620.57  | 625.61  | 632.39  |
| 632.66  | 633.19  | 633.64  | 641.41  | 648.22  | 682.68  |
| 686.12  | 706.08  | 707.63  | 717.23  | 717.35  | 722.11  |
| 725.10  | 725.64  | 768.66  | 769.88  | 783.34  | 785.07  |
| 811.20  | 813.86  | 836.99  | 845.07  | 845.17  | 852.40  |
| 856.45  | 861.66  | 862.07  | 874.14  | 874.87  | 876.01  |
| 893.79  | 897.36  | 902.04  | 906.02  | 925.61  | 929.23  |
| 930.30  | 932.72  | 937.90  | 941.42  | 958.86  | 974.11  |
| 974.78  | 978.00  | 980.20  | 983.18  | 994.44  | 999.84  |
| 1001.16 | 1004.65 | 1005.99 | 1011.76 | 1013.80 | 1014.34 |
| 1014.81 | 1015.57 | 1017.01 | 1017.62 | 1026.24 | 1040.02 |
| 1044.96 | 1055.86 | 1056.71 | 1058.00 | 1059.71 | 1062.78 |
| 1063.22 | 1065.95 | 1067.00 | 1067.27 | 1067.96 | 1112.05 |
| 1112.69 | 1116.74 | 1118.04 | 1128.44 | 1131.14 | 1146.17 |
| 1150.72 | 1173.67 | 1182.18 | 1187.67 | 1195.22 | 1195.67 |
| 1197.30 | 1197.77 | 1210.37 | 1212.16 | 1220.60 | 1222.51 |
| 1225.22 | 1226.02 | 1229.10 | 1230.31 | 1232.97 | 1246.58 |
| 1247.62 | 1254.33 | 1261.98 | 1285.59 | 1291.73 | 1296.12 |
| 1298.86 | 1312.31 | 1313.61 | 1314.30 | 1321.48 | 1332.43 |
| 1342.76 | 1344.19 | 1353.15 | 1354.43 | 1360.89 | 1363.21 |
| 1367.97 | 1370.15 | 1373.19 | 1375.31 | 1398.62 | 1401.55 |
| 1424.74 | 1427.42 | 1428.86 | 1431.49 | 1448.10 | 1464.12 |
| 1475.94 | 1481.83 | 1489.71 | 1490.72 | 1491.78 | 1492.98 |
| 1494.81 | 1496.48 | 1498.84 | 1502.67 | 1506.71 | 1507.08 |
| 1511.25 | 1515.51 | 1516.08 | 1522.84 | 1537.32 | 1540.18 |
| 1540.40 | 1542.80 | 1579.18 | 1624.82 | 1631.72 | 1634.46 |
| 1635.13 | 1636.70 | 1657.53 | 1658.66 | 1658.78 | 1659.65 |
| 1660.40 | 3026.94 | 3027.56 | 3029.87 | 3036.90 | 3037.71 |
| 3040.07 | 3041.68 | 3043.59 | 3045.77 | 3046.00 | 3047.34 |
| 3050.30 | 3054.84 | 3081.55 | 3082.11 | 3086.55 | 3095.94 |
| 3098.40 | 3098.93 | 3110.92 | 3112.46 | 3113.63 | 3114.59 |
| 3117.34 | 3132.53 | 3151.40 | 3155.55 | 3157.61 | 3158.31 |
| 3164.62 | 3167.05 | 3169.17 | 3170.05 | 3172.47 | 3176.82 |
| 3177.43 | 3181.22 | 3185.08 | 3185.34 | 3186.88 | 3187.87 |
| 3195.21 | 3196.62 | 3200.03 | 3200.12 | 3206.11 | 3207.39 |

**I<sub>s</sub>-TS**

|         |        |        |        |        |        |
|---------|--------|--------|--------|--------|--------|
| -827.22 | 15.54  | 24.27  | 32.93  | 34.42  | 36.09  |
| 37.02   | 42.70  | 44.29  | 50.34  | 54.28  | 56.18  |
| 59.38   | 63.88  | 65.88  | 69.76  | 72.82  | 82.72  |
| 89.86   | 97.14  | 100.70 | 109.78 | 115.69 | 117.15 |
| 125.84  | 133.88 | 155.52 | 164.40 | 170.65 | 180.40 |
| 184.66  | 194.52 | 197.04 | 210.78 | 220.89 | 225.70 |
| 230.44  | 232.58 | 246.03 | 250.54 | 260.81 | 262.15 |
| 288.71  | 306.42 | 313.15 | 327.67 | 334.33 | 349.57 |

|         |         |         |         |         |         |
|---------|---------|---------|---------|---------|---------|
| 386.45  | 410.88  | 412.35  | 414.88  | 417.39  | 417.93  |
| 422.61  | 426.06  | 438.08  | 438.65  | 455.51  | 467.80  |
| 471.36  | 481.09  | 485.91  | 496.43  | 508.62  | 515.60  |
| 516.26  | 528.18  | 549.30  | 555.42  | 569.09  | 572.99  |
| 596.67  | 620.94  | 627.17  | 631.21  | 631.33  | 632.47  |
| 633.00  | 634.18  | 641.30  | 697.43  | 698.66  | 709.34  |
| 710.79  | 712.26  | 713.07  | 713.47  | 715.39  | 716.16  |
| 721.81  | 723.77  | 735.77  | 753.63  | 758.75  | 761.11  |
| 763.37  | 765.12  | 767.02  | 768.57  | 770.36  | 788.83  |
| 801.43  | 826.70  | 827.84  | 849.32  | 858.79  | 870.46  |
| 872.37  | 874.83  | 876.26  | 883.97  | 894.05  | 906.99  |
| 939.84  | 940.41  | 941.66  | 944.15  | 947.14  | 949.14  |
| 959.04  | 967.41  | 974.70  | 976.31  | 978.41  | 988.33  |
| 988.92  | 991.06  | 993.81  | 1003.66 | 1007.70 | 1008.42 |
| 1010.18 | 1012.44 | 1014.41 | 1015.14 | 1016.07 | 1016.33 |
| 1029.44 | 1050.57 | 1051.83 | 1053.25 | 1054.02 | 1054.28 |
| 1071.40 | 1088.16 | 1108.03 | 1109.15 | 1109.80 | 1113.53 |
| 1114.22 | 1120.52 | 1120.90 | 1123.43 | 1125.56 | 1132.10 |
| 1133.82 | 1137.16 | 1141.80 | 1153.41 | 1154.33 | 1155.86 |
| 1189.56 | 1193.78 | 1196.55 | 1197.86 | 1198.07 | 1202.02 |
| 1203.51 | 1209.66 | 1212.96 | 1216.86 | 1217.88 | 1220.28 |
| 1223.02 | 1224.15 | 1226.51 | 1275.52 | 1280.90 | 1288.39 |
| 1297.61 | 1328.54 | 1328.77 | 1330.69 | 1333.03 | 1341.31 |
| 1360.65 | 1364.47 | 1365.53 | 1368.28 | 1368.55 | 1370.04 |
| 1380.07 | 1415.28 | 1443.26 | 1446.79 | 1447.80 | 1466.10 |
| 1475.40 | 1475.49 | 1477.97 | 1479.26 | 1484.71 | 1485.97 |
| 1494.65 | 1503.69 | 1521.42 | 1524.04 | 1524.46 | 1526.79 |
| 1527.68 | 1542.87 | 1554.99 | 1556.03 | 1612.37 | 1626.33 |
| 1626.71 | 1627.97 | 1628.38 | 1644.31 | 1645.21 | 1645.99 |
| 1646.45 | 1647.05 | 1648.20 | 1651.34 | 1669.64 | 1675.77 |
| 3026.65 | 3027.19 | 3082.97 | 3103.83 | 3147.23 | 3152.08 |
| 3152.63 | 3156.72 | 3167.50 | 3169.25 | 3171.40 | 3172.80 |
| 3173.98 | 3175.54 | 3181.77 | 3183.46 | 3184.57 | 3186.20 |
| 3189.57 | 3192.81 | 3193.63 | 3195.30 | 3195.55 | 3199.31 |
| 3200.43 | 3200.72 | 3201.52 | 3208.10 | 3208.27 | 3209.33 |
| 3210.40 | 3214.00 | 3214.83 | 3223.40 | 3227.00 | 3232.64 |

**I<sub>s</sub>-TS'**

|         |         |         |         |         |         |
|---------|---------|---------|---------|---------|---------|
| -791.87 | 29.95   | 36.39   | 39.64   | 49.18   | 50.38   |
| 50.89   | 54.61   | 56.24   | 63.68   | 67.01   | 68.92   |
| 70.80   | 71.71   | 77.58   | 81.81   | 85.92   | 92.77   |
| 93.52   | 99.12   | 114.10  | 116.77  | 118.00  | 125.37  |
| 135.76  | 148.43  | 151.52  | 160.48  | 162.80  | 176.63  |
| 183.64  | 192.67  | 201.41  | 217.05  | 224.64  | 232.16  |
| 235.45  | 236.76  | 253.92  | 258.66  | 262.71  | 265.25  |
| 289.48  | 304.79  | 312.46  | 328.75  | 337.06  | 350.39  |
| 404.37  | 406.26  | 417.81  | 419.23  | 422.54  | 423.77  |
| 426.48  | 429.73  | 439.22  | 444.69  | 454.87  | 467.71  |
| 469.78  | 480.62  | 484.41  | 511.30  | 514.54  | 516.62  |
| 519.51  | 528.29  | 546.52  | 551.83  | 568.38  | 575.68  |
| 596.07  | 621.08  | 626.28  | 631.53  | 632.06  | 633.51  |
| 633.89  | 634.91  | 639.37  | 697.52  | 699.31  | 710.07  |
| 710.55  | 711.34  | 715.34  | 715.98  | 719.57  | 720.14  |
| 722.28  | 722.73  | 735.36  | 754.54  | 759.60  | 764.96  |
| 765.83  | 769.28  | 770.88  | 772.64  | 775.22  | 792.42  |
| 798.60  | 825.47  | 832.86  | 844.69  | 856.72  | 874.70  |
| 876.46  | 881.35  | 882.42  | 884.96  | 891.20  | 906.62  |
| 939.00  | 944.89  | 945.60  | 948.49  | 953.39  | 954.11  |
| 958.55  | 974.42  | 975.45  | 977.40  | 978.74  | 991.91  |
| 992.38  | 997.99  | 999.54  | 1004.34 | 1010.42 | 1010.94 |
| 1013.76 | 1015.14 | 1016.05 | 1017.01 | 1017.37 | 1019.00 |
| 1027.32 | 1051.75 | 1054.30 | 1054.51 | 1054.71 | 1055.23 |
| 1071.95 | 1089.74 | 1108.19 | 1109.03 | 1113.64 | 1115.95 |
| 1116.94 | 1118.24 | 1118.95 | 1122.67 | 1124.73 | 1132.23 |
| 1138.34 | 1138.83 | 1143.97 | 1145.60 | 1155.46 | 1156.10 |
| 1190.88 | 1198.11 | 1199.47 | 1199.64 | 1199.79 | 1200.81 |
| 1206.83 | 1207.69 | 1212.86 | 1214.48 | 1217.97 | 1224.41 |
| 1226.39 | 1227.95 | 1228.56 | 1273.83 | 1276.48 | 1288.91 |
| 1297.34 | 1326.71 | 1329.35 | 1331.39 | 1334.96 | 1343.14 |
| 1361.13 | 1366.11 | 1367.29 | 1369.92 | 1370.13 | 1370.21 |
| 1377.90 | 1438.74 | 1445.14 | 1448.29 | 1451.21 | 1466.11 |
| 1475.95 | 1476.17 | 1479.76 | 1481.79 | 1484.28 | 1487.40 |
| 1492.69 | 1502.04 | 1524.05 | 1524.85 | 1527.83 | 1527.90 |
| 1529.08 | 1545.92 | 1554.26 | 1554.58 | 1614.33 | 1626.38 |

|         |         |         |         |         |         |
|---------|---------|---------|---------|---------|---------|
| 1628.27 | 1628.50 | 1630.69 | 1643.85 | 1644.69 | 1645.06 |
| 1647.89 | 1648.54 | 1649.36 | 1653.92 | 1671.01 | 1674.71 |
| 3031.58 | 3033.49 | 3084.49 | 3086.33 | 3152.19 | 3158.14 |
| 3160.13 | 3167.20 | 3168.38 | 3172.30 | 3173.97 | 3175.80 |
| 3176.08 | 3179.63 | 3179.75 | 3181.60 | 3188.75 | 3190.43 |
| 3191.38 | 3193.32 | 3196.47 | 3196.50 | 3197.34 | 3199.85 |
| 3204.47 | 3205.07 | 3207.69 | 3208.57 | 3211.08 | 3215.22 |
| 3215.33 | 3217.10 | 3221.89 | 3224.77 | 3229.36 | 3242.19 |

**II<sub>s</sub>**

|         |         |         |         |         |         |
|---------|---------|---------|---------|---------|---------|
| 9.82    | 18.94   | 24.04   | 28.61   | 32.01   | 34.05   |
| 36.57   | 40.38   | 44.66   | 50.61   | 51.10   | 52.60   |
| 55.91   | 59.26   | 65.37   | 66.91   | 75.59   | 86.49   |
| 90.49   | 94.87   | 98.78   | 105.23  | 109.72  | 116.40  |
| 121.65  | 125.64  | 151.84  | 156.73  | 172.58  | 181.58  |
| 184.77  | 192.44  | 204.60  | 212.30  | 221.73  | 224.20  |
| 226.97  | 231.23  | 235.23  | 247.52  | 254.34  | 258.82  |
| 261.13  | 308.78  | 314.82  | 328.14  | 332.71  | 350.44  |
| 394.53  | 409.54  | 412.60  | 415.14  | 416.23  | 418.24  |
| 421.56  | 424.27  | 436.33  | 438.96  | 454.78  | 467.58  |
| 473.21  | 478.26  | 479.02  | 509.45  | 513.21  | 517.46  |
| 522.71  | 537.04  | 553.04  | 566.99  | 575.33  | 597.91  |
| 624.25  | 625.29  | 630.55  | 631.00  | 632.32  | 632.97  |
| 634.19  | 644.12  | 696.32  | 701.25  | 709.29  | 710.32  |
| 711.68  | 712.72  | 714.39  | 714.93  | 715.48  | 722.43  |
| 722.99  | 737.18  | 754.63  | 757.99  | 763.44  | 764.27  |
| 765.01  | 765.96  | 767.57  | 771.33  | 778.10  | 824.30  |
| 826.54  | 848.41  | 865.50  | 868.86  | 869.43  | 871.60  |
| 872.50  | 888.60  | 894.57  | 907.69  | 929.78  | 938.09  |
| 939.31  | 940.04  | 941.28  | 944.15  | 945.90  | 963.15  |
| 973.28  | 975.97  | 977.77  | 984.60  | 985.04  | 988.13  |
| 989.04  | 992.72  | 1005.23 | 1006.18 | 1007.37 | 1009.25 |
| 1012.53 | 1015.00 | 1015.23 | 1016.35 | 1016.77 | 1031.51 |
| 1050.35 | 1052.33 | 1053.18 | 1053.37 | 1056.64 | 1058.86 |
| 1073.66 | 1088.74 | 1090.44 | 1109.12 | 1109.91 | 1113.13 |
| 1114.60 | 1120.83 | 1123.72 | 1124.60 | 1126.21 | 1129.78 |
| 1133.82 | 1137.64 | 1143.34 | 1144.51 | 1155.77 | 1188.91 |
| 1193.72 | 1196.74 | 1197.37 | 1197.67 | 1200.14 | 1207.46 |
| 1209.64 | 1212.04 | 1212.33 | 1218.19 | 1218.42 | 1222.99 |
| 1226.04 | 1235.84 | 1272.85 | 1287.27 | 1299.02 | 1316.57 |
| 1327.13 | 1329.05 | 1330.61 | 1331.96 | 1361.03 | 1362.01 |
| 1363.22 | 1364.61 | 1367.20 | 1367.59 | 1377.83 | 1393.79 |
| 1413.45 | 1442.87 | 1445.62 | 1466.48 | 1474.48 | 1476.52 |
| 1477.49 | 1478.56 | 1483.92 | 1490.24 | 1496.80 | 1502.43 |
| 1503.91 | 1516.49 | 1523.29 | 1524.04 | 1525.92 | 1526.77 |
| 1528.11 | 1553.01 | 1553.77 | 1607.84 | 1625.70 | 1627.45 |
| 1628.75 | 1629.13 | 1642.99 | 1645.11 | 1645.81 | 1646.08 |
| 1646.43 | 1647.58 | 1648.97 | 1670.09 | 1673.87 | 2967.21 |
| 3007.01 | 3011.78 | 3038.28 | 3060.16 | 3089.71 | 3094.70 |
| 3099.92 | 3149.41 | 3160.52 | 3165.64 | 3169.44 | 3170.68 |
| 3173.63 | 3175.10 | 3175.52 | 3180.95 | 3184.89 | 3186.58 |
| 3187.64 | 3188.80 | 3191.06 | 3195.81 | 3196.07 | 3197.88 |
| 3198.47 | 3201.91 | 3202.13 | 3202.51 | 3204.53 | 3206.65 |
| 3208.40 | 3209.76 | 3211.03 | 3211.36 | 3224.06 | 3225.84 |

**II<sub>s</sub>-TS**

|         |        |        |        |        |        |
|---------|--------|--------|--------|--------|--------|
| -434.67 | 12.56  | 14.80  | 21.40  | 24.70  | 29.20  |
| 31.60   | 33.79  | 38.73  | 40.26  | 42.31  | 45.04  |
| 49.37   | 52.21  | 55.23  | 55.69  | 60.44  | 63.45  |
| 64.90   | 69.34  | 71.42  | 71.74  | 75.27  | 78.14  |
| 82.79   | 90.73  | 93.70  | 95.56  | 99.09  | 105.12 |
| 105.57  | 115.04 | 116.56 | 119.90 | 128.03 | 129.67 |
| 133.60  | 139.11 | 142.65 | 146.30 | 152.44 | 156.95 |
| 162.60  | 170.48 | 173.72 | 181.72 | 187.23 | 191.74 |
| 194.46  | 203.43 | 209.39 | 219.98 | 221.83 | 227.98 |
| 229.67  | 232.25 | 233.99 | 235.74 | 238.86 | 245.05 |
| 255.10  | 264.02 | 266.48 | 276.84 | 283.29 | 285.62 |
| 308.38  | 310.44 | 316.61 | 325.84 | 329.17 | 333.83 |
| 351.40  | 361.52 | 365.73 | 411.09 | 414.62 | 417.59 |
| 420.03  | 421.81 | 422.66 | 427.68 | 429.68 | 432.65 |
| 436.80  | 441.77 | 443.52 | 449.13 | 459.42 | 462.25 |
| 479.42  | 482.53 | 509.83 | 513.50 | 514.45 | 517.09 |
| 527.68  | 528.79 | 535.56 | 536.98 | 552.82 | 553.69 |

570.19 572.10 573.91 574.46 584.89 597.63  
599.85 606.10 625.62 626.62 628.78 631.24  
631.99 633.02 633.52 640.51 646.25 695.86  
696.19 708.40 710.11 711.42 712.46 715.51  
715.80 720.05 721.64 723.01 725.53 733.76  
737.10 754.30 759.18 763.29 765.84 766.93  
768.06 768.24 770.17 770.50 771.78 784.19  
784.71 794.52 827.92 828.29 828.99 851.64  
863.60 866.04 873.09 873.58 873.66 878.62  
882.20 884.50 893.79 894.18 895.38 897.15  
905.47 912.21 929.31 939.44 942.54 946.31  
947.06 950.32 951.47 955.56 959.47 966.48  
971.69 974.09 978.15 982.13 982.83 990.45  
992.34 993.79 998.15 998.54 1011.08 1011.34  
1013.54 1014.46 1015.30 1016.01 1019.90 1020.22  
1023.45 1026.33 1029.07 1038.40 1045.36 1045.88  
1048.73 1050.84 1051.76 1053.35 1053.93 1057.18  
1063.27 1064.81 1066.54 1071.95 1072.56 1072.73  
1084.78 1090.67 1107.46 1110.74 1111.29 1114.34  
1115.71 1116.56 1119.22 1120.15 1126.97 1133.52  
1135.76 1137.67 1145.00 1145.25 1145.99 1157.16  
1182.21 1187.65 1189.40 1194.28 1195.56 1196.25  
1197.01 1199.79 1200.37 1207.80 1210.29 1212.12  
1214.70 1222.28 1222.59 1227.67 1234.10 1239.08  
1246.57 1249.01 1274.89 1288.27 1288.83 1297.18  
1303.41 1318.37 1323.34 1326.08 1327.11 1330.00  
1334.80 1335.65 1359.48 1363.47 1365.87 1366.39  
1366.67 1368.48 1374.06 1378.62 1396.97 1407.92  
1420.63 1426.16 1430.84 1433.98 1445.04 1447.44  
1451.62 1465.77 1470.46 1472.36 1473.79 1476.95  
1479.41 1483.40 1484.01 1491.59 1494.80 1495.52  
1496.21 1497.31 1501.01 1503.70 1506.81 1507.96  
1515.55 1515.70 1525.20 1525.71 1525.92 1527.26  
1529.47 1531.49 1552.61 1552.77 1581.91 1609.80  
1617.52 1624.39 1625.17 1626.96 1628.68 1642.39  
1643.07 1643.79 1644.56 1644.80 1646.89 1647.23  
1648.64 1655.05 1660.17 1668.83 1671.82 1767.58  
2973.76 3031.78 3032.50 3034.68 3049.06 3058.60  
3077.86 3087.81 3090.69 3090.91 3112.34 3113.28  
3120.55 3133.34 3134.06 3135.58 3144.34 3153.91  
3160.01 3162.88 3167.46 3171.22 3171.28 3173.35  
3174.67 3174.95 3180.61 3184.57 3188.26 3188.54  
3191.38 3192.39 3192.79 3193.05 3196.38 3199.15  
3199.91 3201.43 3202.50 3204.41 3208.54 3209.54  
3211.09 3212.25 3213.86 3214.04 3219.17 3219.31  
3220.40 3224.29 3227.21 3239.59 3244.06 3293.11

III<sub>SN</sub>

18.83 24.23 28.75 32.82 36.51 39.25  
39.49 41.14 47.91 49.99 54.63 55.80  
57.88 63.16 65.61 72.43 75.08 77.58  
79.54 86.09 91.21 94.46 98.56 101.72  
109.06 116.94 123.89 127.63 134.43 140.19  
142.37 147.48 156.16 171.95 175.46 185.25  
194.37 205.59 210.73 217.41 222.42 228.39  
233.98 240.35 251.02 253.23 258.08 262.21  
264.81 288.14 307.99 314.46 321.09 329.24  
334.51 350.97 352.73 408.01 409.99 414.18  
415.51 422.36 424.18 426.69 427.94 434.07  
443.97 445.72 450.09 452.79 462.86 476.76  
491.27 507.14 510.18 514.16 517.55 528.04  
554.66 555.21 565.14 573.78 586.19 598.40  
619.50 620.86 623.20 627.09 627.66 629.09  
630.81 632.24 640.20 647.26 692.94 693.48  
695.16 705.03 708.42 709.88 712.34 713.20  
718.12 721.37 723.88 736.12 752.74 757.50  
760.46 762.45 764.79 766.15 769.28 769.75  
772.38 780.57 783.63 793.85 804.84 824.51  
832.38 854.58 862.98 864.58 867.91 868.95  
879.73 881.27 889.26 895.14 895.31 910.43  
935.50 940.16 940.34 942.87 943.40 945.22  
947.34 947.94 951.05 961.55 965.32 966.46  
981.35 985.04 988.01 989.24 989.79 999.19  
1001.67 1009.49 1010.20 1010.64 1012.90 1013.63

1014.81 1015.11 1016.87 1021.18 1022.72 1031.28  
1037.36 1042.96 1045.65 1046.19 1052.26 1052.40  
1058.51 1065.60 1086.29 1093.97 1103.32 1108.81  
1112.73 1113.57 1113.79 1115.30 1119.37 1119.47  
1126.48 1132.91 1137.79 1139.90 1141.63 1143.28  
1153.60 1163.48 1164.71 1186.69 1198.76 1200.02  
1200.59 1201.45 1202.74 1204.20 1205.78 1210.07  
1214.01 1217.69 1219.38 1219.65 1221.69 1225.93  
1231.48 1264.08 1273.47 1282.45 1292.54 1302.92  
1305.46 1326.85 1327.71 1332.52 1333.83 1347.94  
1361.62 1363.45 1366.63 1370.62 1372.69 1376.08  
1377.48 1383.95 1405.33 1410.42 1428.90 1442.69  
1445.56 1466.86 1470.03 1473.91 1474.34 1476.32  
1477.05 1480.11 1484.11 1496.07 1496.22 1501.26  
1504.43 1513.37 1518.72 1522.39 1524.47 1526.18  
1526.97 1540.20 1552.82 1554.70 1612.67 1621.27  
1624.08 1625.36 1625.60 1630.02 1639.58 1642.10  
1642.81 1643.39 1644.24 1644.72 1644.87 1646.70  
1661.90 1667.66 3010.35 3036.29 3054.17 3107.86  
3109.24 3116.23 3163.67 3177.72 3179.18 3180.96  
3184.49 3184.79 3188.93 3189.94 3190.38 3190.75  
3191.91 3194.15 3195.37 3196.03 3196.83 3198.44  
3199.60 3200.84 3206.54 3207.65 3207.77 3208.52  
3209.09 3210.25 3210.81 3213.87 3214.47 3216.06  
3219.69 3222.05 3223.66 3225.48 3228.64 3233.64  
3241.47 3253.25 3275.87

III<sub>SN-TS</sub>

-198.78 10.17 17.78 26.25 28.68 34.19  
36.18 38.99 42.01 45.75 50.12 54.56  
56.21 57.83 61.08 64.92 69.71 75.74  
77.15 79.86 87.12 93.65 97.01 103.19  
105.02 107.91 118.11 127.50 127.83 136.29  
140.79 148.95 156.89 165.75 173.22 185.00  
195.68 207.44 212.16 224.75 229.07 231.57  
234.24 247.11 249.82 253.12 259.38 262.99  
270.39 276.44 282.42 308.61 320.25 325.50  
332.93 351.44 372.46 408.96 413.71 414.41  
416.77 421.22 425.77 428.24 429.26 431.74  
438.17 444.19 449.79 451.83 462.39 475.64  
489.15 506.06 510.99 517.22 519.22 528.57  
546.05 555.10 557.57 572.71 584.86 598.03  
616.09 621.37 622.06 626.40 627.64 629.75  
632.11 632.26 633.99 639.05 691.85 694.70  
702.73 707.57 708.49 710.12 711.14 712.20  
717.64 718.49 723.70 736.02 746.82 752.14  
754.08 757.04 762.29 764.62 766.30 766.50  
769.75 770.56 773.27 789.81 797.23 824.08  
830.23 862.81 865.86 867.44 869.04 870.05  
871.26 879.38 880.22 894.42 898.19 908.41  
933.50 937.00 939.16 942.14 943.81 946.47  
946.90 955.69 957.05 964.24 967.66 968.02  
984.43 985.84 989.51 991.00 995.98 996.56  
1006.71 1008.04 1009.34 1012.66 1014.26 1014.81  
1016.52 1017.55 1018.64 1019.62 1030.41 1033.51  
1035.31 1046.92 1049.03 1050.36 1051.69 1057.42  
1059.16 1066.79 1085.90 1088.03 1110.73 1111.74  
1112.86 1113.76 1114.34 1116.84 1117.16 1119.31  
1124.81 1131.76 1137.70 1139.86 1140.96 1146.12  
1147.08 1161.09 1161.37 1183.80 1198.65 1199.06  
1199.91 1201.49 1202.21 1202.73 1205.78 1212.75  
1213.67 1216.09 1219.18 1220.36 1221.27 1226.14  
1228.14 1249.30 1273.11 1284.89 1292.57 1301.25  
1302.59 1324.18 1324.35 1330.43 1331.07 1332.13  
1362.45 1362.78 1365.48 1367.39 1368.65 1372.13  
1372.30 1383.63 1401.76 1408.20 1420.92 1442.74  
1445.15 1467.36 1471.34 1473.53 1474.28 1478.08  
1479.74 1481.57 1484.64 1494.30 1495.17 1503.19  
1507.06 1518.17 1523.58 1524.39 1524.98 1525.74  
1536.02 1549.85 1553.92 1554.94 1611.51 1622.44  
1622.70 1624.43 1626.62 1629.02 1638.89 1641.82  
1642.07 1643.46 1644.65 1645.53 1646.56 1648.34  
1665.53 1669.78 3018.62 3033.45 3045.58 3103.60  
3112.96 3115.74 3170.17 3172.11 3173.97 3175.25

3176.77 3181.15 3182.77 3183.21 3184.91 3186.11  
 3187.84 3188.44 3190.81 3190.89 3193.56 3194.41  
 3196.52 3196.67 3197.17 3199.84 3200.20 3202.91  
 3204.61 3205.05 3205.29 3206.37 3210.07 3211.61  
 3212.19 3213.11 3218.66 3221.40 3227.06 3236.75  
 3244.63 3247.54 3271.55

V<sub>SN</sub>

3.89 12.65 23.12 25.94 28.84 33.44  
 34.45 36.41 39.45 41.92 45.81 50.59  
 53.27 56.00 57.94 59.55 66.95 69.88  
 71.69 83.07 89.92 93.46 96.04 102.23  
 109.42 115.22 119.38 123.57 126.32 136.42  
 147.97 169.42 174.94 179.30 185.98 190.41  
 193.56 209.58 217.14 220.09 227.95 230.12  
 234.85 246.41 249.16 255.09 262.62 279.91  
 291.63 304.80 306.05 316.99 322.26 336.99  
 353.79 369.48 408.28 412.77 413.31 414.43  
 417.71 421.15 424.49 426.47 437.52 440.80  
 441.35 453.81 468.89 480.49 482.00 483.94  
 486.93 506.72 514.00 517.22 528.11 545.52  
 556.12 571.03 588.35 590.30 598.62 623.19  
 625.44 627.30 629.27 629.93 630.44 631.59  
 631.72 641.41 642.72 694.12 696.43 699.92  
 707.65 708.30 710.99 711.27 715.62 717.28  
 718.02 725.17 725.54 736.19 751.46 756.86  
 761.10 763.44 765.05 767.88 768.14 768.60  
 770.75 771.14 780.72 802.48 813.62 828.89  
 831.68 862.26 863.07 864.42 865.67 866.22  
 869.16 876.02 879.48 890.05 895.93 908.27  
 935.39 937.95 940.43 941.94 943.12 943.53  
 952.81 957.52 964.86 967.66 975.99 977.68  
 982.39 983.75 985.46 991.56 998.82 1010.26  
 1010.67 1012.71 1013.18 1013.95 1014.30 1014.32  
 1015.25 1016.36 1018.92 1031.83 1044.59 1046.36  
 1050.43 1050.94 1051.61 1053.02 1064.67 1067.14  
 1073.96 1086.87 1101.61 1108.79 1111.14 1113.64  
 1114.45 1116.98 1117.71 1120.81 1122.67 1126.25  
 1137.57 1137.85 1138.41 1140.16 1147.33 1162.00  
 1162.45 1195.71 1199.37 1199.77 1200.33 1201.37  
 1202.10 1202.43 1205.08 1212.50 1213.61 1216.47  
 1216.89 1218.68 1222.09 1225.88 1227.15 1228.14  
 1260.00 1275.23 1292.76 1302.01 1308.00 1315.89  
 1323.08 1327.16 1329.80 1330.28 1330.68 1358.97  
 1360.28 1361.06 1361.96 1366.51 1368.92 1374.02  
 1378.50 1385.20 1393.86 1420.14 1434.28 1443.18  
 1445.60 1466.43 1473.49 1475.80 1478.09 1478.47  
 1485.67 1491.77 1496.51 1497.36 1503.15 1504.79  
 1508.70 1513.99 1523.23 1523.75 1524.36 1525.93  
 1535.13 1543.21 1553.58 1555.02 1624.19 1624.41  
 1624.88 1626.60 1627.50 1641.63 1642.20 1642.31  
 1643.40 1643.89 1644.53 1644.89 1663.86 1664.53  
 1665.28 1669.20 3034.90 3042.21 3047.59 3066.20  
 3104.60 3114.22 3140.29 3159.39 3165.18 3168.05  
 3169.81 3179.07 3180.43 3182.64 3183.60 3183.83  
 3184.48 3186.09 3188.54 3191.46 3192.91 3194.11  
 3195.50 3196.47 3197.02 3200.59 3201.09 3202.20  
 3207.68 3208.50 3208.88 3210.26 3210.55 3211.97  
 3214.85 3216.38 3219.08 3219.37 3225.90 3229.49  
 3231.91 3232.98 3280.96

V<sub>ISN</sub>

5.47 12.38 13.66 18.36 22.43 28.98  
 31.01 34.99 41.17 42.30 44.92 46.62  
 48.81 52.39 53.93 56.59 58.05 59.93  
 60.69 64.86 66.67 72.73 75.94 79.90  
 86.21 87.29 90.74 94.26 96.04 99.39  
 108.91 114.69 118.78 120.68 122.61 124.98  
 132.16 147.68 153.54 156.98 160.12 164.94  
 173.86 175.43 186.22 187.39 189.81 194.59  
 199.80 208.05 212.03 213.32 226.69 230.01  
 233.98 236.86 248.40 253.85 260.36 265.44  
 266.94 269.59 280.71 308.29 309.47 310.39

314.97 316.65 330.30 338.02 344.67 354.45  
 374.20 381.10 412.78 416.42 416.65 418.00  
 421.81 424.97 429.23 431.77 433.10 437.51  
 441.37 450.34 458.70 465.24 478.44 483.55  
 486.80 488.52 506.85 514.26 523.39 524.93  
 532.22 534.07 542.81 548.23 562.81 570.00  
 584.25 584.69 593.72 597.62 602.71 613.62  
 624.04 627.16 628.04 629.29 629.87 631.73  
 632.12 634.20 641.60 646.55 694.16 699.17  
 706.44 709.52 710.51 714.24 714.36 717.75  
 719.05 719.25 720.06 725.96 730.58 735.18  
 739.74 750.88 758.61 759.32 763.05 764.23  
 764.47 772.27 773.38 777.71 782.55 789.41  
 812.17 816.96 820.86 829.06 838.32 845.42  
 860.23 864.19 864.70 871.36 872.42 874.13  
 875.60 882.26 891.80 900.03 900.46 907.52  
 929.08 931.29 935.05 942.27 948.64 949.75  
 953.59 957.52 964.66 965.68 968.06 970.36  
 974.25 977.57 982.10 990.91 993.54 995.48  
 997.60 999.31 1006.48 1007.37 1010.88 1012.91  
 1013.75 1016.09 1017.07 1030.92 1040.92 1041.32  
 1046.37 1047.01 1048.67 1050.36 1051.01 1051.72  
 1052.64 1062.34 1063.23 1067.17 1069.63 1070.38  
 1074.62 1079.36 1083.36 1086.88 1101.90 1105.50  
 1111.46 1111.65 1112.33 1117.61 1118.02 1120.65  
 1124.68 1127.65 1130.08 1134.30 1135.85 1136.96  
 1149.32 1153.46 1156.31 1165.36 1195.01 1195.58  
 1196.01 1196.99 1197.52 1198.17 1200.45 1207.84  
 1212.56 1214.94 1217.95 1219.54 1220.64 1223.50  
 1225.98 1226.50 1227.66 1235.47 1258.44 1276.29  
 1285.29 1287.66 1292.80 1311.69 1318.82 1322.02  
 1322.54 1327.09 1328.29 1332.16 1332.67 1339.23  
 1357.11 1358.05 1361.25 1365.06 1367.14 1368.59  
 1372.04 1380.37 1385.56 1385.85 1403.17 1418.83  
 1425.73 1432.12 1436.14 1438.17 1442.38 1446.28  
 1450.87 1463.27 1472.15 1472.54 1473.35 1475.92  
 1477.60 1484.45 1488.33 1489.99 1490.96 1495.33  
 1499.18 1500.43 1503.62 1506.21 1509.66 1514.56  
 1517.05 1520.73 1523.61 1525.26 1525.52 1530.06  
 1535.95 1542.20 1549.91 1555.26 1556.24 1615.40  
 1620.82 1623.29 1626.44 1626.56 1627.59 1640.63  
 1641.17 1642.56 1642.58 1644.58 1645.44 1649.75  
 1660.16 1663.57 1665.87 1669.82 1670.59 1683.23  
 3026.09 3033.17 3035.15 3038.88 3047.40 3058.01  
 3063.41 3084.02 3095.29 3099.59 3109.66 3110.30  
 3115.24 3120.68 3147.57 3148.22 3150.56 3152.82  
 3155.37 3163.00 3167.24 3167.67 3169.13 3169.70  
 3170.91 3171.57 3172.11 3178.73 3180.06 3180.40  
 3181.21 3181.97 3186.70 3189.77 3189.84 3190.27  
 3190.51 3193.53 3196.37 3198.11 3198.98 3202.86  
 3207.30 3209.31 3210.89 3211.29 3212.73 3216.53  
 3227.25 3229.10 3229.34 3229.43 3254.81 3272.30

II<sub>s</sub>-TS'

-202.33 10.00 11.23 20.01 21.98 28.00  
 32.54 33.31 34.13 41.74 43.57 48.13  
 48.67 51.07 52.91 55.07 57.05 60.90  
 63.90 64.61 71.49 73.43 74.35 79.23  
 82.19 89.11 95.38 95.93 101.84 103.53  
 106.66 108.65 112.66 115.45 116.49 122.26  
 124.55 128.30 133.56 135.28 141.99 152.67  
 161.68 167.89 174.71 181.95 185.77 190.64  
 197.82 203.83 207.93 218.19 219.30 224.51  
 226.85 231.26 233.79 236.59 244.14 245.89  
 250.78 258.51 259.39 259.48 273.98 284.78  
 295.54 301.84 306.62 313.82 324.69 331.71  
 336.44 351.02 395.12 404.45 408.80 411.62  
 414.13 416.55 422.23 429.55 430.72 432.91  
 440.11 441.95 445.87 450.68 454.49 463.02  
 478.33 480.24 494.78 509.26 513.44 513.73  
 517.28 525.37 530.23 535.23 541.90 549.66  
 550.76 558.83 573.74 576.36 590.50 596.78  
 599.39 604.83 622.75 624.89 627.43 628.86  
 630.66 631.10 631.84 635.13 640.49 693.19



694.98 706.52 707.23 709.62 712.24 715.53  
717.86 718.39 721.28 722.71 733.58 737.39  
750.67 752.34 756.59 757.03 761.18 765.45  
766.60 767.95 771.57 772.37 774.70 776.53  
781.39 784.68 812.05 825.06 825.66 855.24  
859.29 861.45 868.42 870.05 875.88 876.19  
878.34 882.18 886.98 890.71 893.54 898.38  
904.96 905.94 920.74 939.87 940.00 941.66  
943.36 947.71 949.81 951.10 953.19 962.48  
971.83 974.62 976.02 986.52 986.92 990.23  
994.10 997.01 997.35 1003.92 1005.99 1008.55  
1010.41 1012.88 1014.57 1016.21 1016.76 1018.29  
1025.68 1029.10 1035.24 1037.70 1042.27 1045.18  
1050.10 1050.18 1051.07 1054.71 1063.32 1063.69  
1068.51 1071.12 1072.28 1073.28 1075.56 1088.08  
1090.16 1093.43 1108.05 1109.08 1109.40 1114.58  
1115.58 1118.82 1119.05 1119.86 1120.49 1132.98  
1137.44 1138.56 1143.15 1145.83 1146.16 1157.80  
1185.36 1192.71 1195.44 1196.08 1197.74 1198.44  
1200.83 1201.69 1203.08 1205.73 1208.96 1213.58  
1216.05 1217.48 1218.40 1225.37 1230.78 1235.37  
1238.68 1245.54 1271.83 1287.05 1288.53 1300.22  
1301.18 1302.17 1322.18 1323.83 1327.37 1328.26  
1329.83 1331.05 1360.31 1360.66 1364.92 1365.32  
1366.99 1367.46 1370.18 1380.37 1399.95 1407.91  
1419.18 1425.15 1427.45 1430.80 1444.63 1444.80  
1447.39 1459.56 1466.54 1468.01 1472.96 1474.23  
1477.48 1479.21 1482.78 1490.08 1491.71 1494.35  
1496.00 1497.95 1500.48 1502.16 1502.31 1508.47  
1513.68 1515.65 1516.85 1522.54 1523.59 1525.44  
1526.58 1527.39 1530.42 1553.82 1554.41 1604.59  
1610.16 1622.89 1623.27 1626.46 1627.15 1637.24  
1638.71 1642.14 1642.73 1643.10 1643.59 1644.39  
1645.18 1647.22 1648.57 1668.81 1672.11 1743.44  
2971.10 3019.52 3026.17 3027.04 3028.91 3035.89  
3076.43 3084.01 3087.80 3089.15 3092.44 3100.83  
3105.97 3117.08 3121.96 3138.10 3141.08 3147.77  
3155.66 3155.80 3156.31 3163.84 3165.09 3166.12  
3170.81 3171.37 3172.89 3173.06 3179.60 3179.84  
3181.73 3182.34 3183.12 3187.95 3189.13 3189.17  
3190.81 3191.56 3195.69 3196.06 3199.27 3201.72  
3204.45 3206.79 3206.85 3208.21 3209.02 3215.56  
3219.01 3221.34 3222.47 3228.87 3270.81 3288.28

III<sub>sc</sub>

17.48 24.42 29.82 35.85 38.89 39.49  
42.45 45.50 54.01 58.05 59.53 62.73  
64.02 68.61 72.30 77.96 80.65 85.20  
92.59 98.63 100.87 103.55 106.60 108.77  
119.81 124.27 126.52 131.72 132.73 137.64  
147.10 158.05 174.25 176.37 184.57 192.72  
195.32 208.15 208.73 220.43 222.09 231.00  
232.11 235.90 247.09 259.89 262.18 266.40  
266.56 308.44 313.75 317.84 319.08 329.17  
336.99 348.72 368.18 400.35 409.02 411.70  
416.96 418.60 422.36 427.93 429.55 438.43  
441.11 445.56 446.95 452.27 462.31 481.90  
487.39 508.45 513.22 516.20 519.18 528.85  
548.73 553.47 570.15 573.09 584.20 598.75  
612.43 622.89 623.70 625.47 628.94 629.14  
630.00 632.18 638.24 645.95 694.02 697.99  
698.53 709.00 709.98 712.80 713.59 716.76  
718.62 725.17 726.86 735.75 744.24 754.19  
757.94 762.25 764.86 765.47 767.26 767.95  
768.61 779.29 781.53 791.70 830.14 830.99  
840.38 857.61 866.52 868.23 870.92 873.23  
877.43 878.07 881.57 895.60 907.89 910.27  
935.45 940.55 942.03 943.79 944.58 948.09  
949.64 949.82 957.41 958.18 966.67 967.87  
985.13 988.01 988.69 992.91 996.35 997.13  
1002.03 1010.02 1011.21 1011.96 1012.96 1014.90  
1015.34 1016.41 1018.87 1019.75 1020.93 1025.51  
1032.82 1037.79 1037.88 1049.81 1050.45 1051.03  
1053.84 1059.19 1068.45 1088.91 1100.31 1110.68

1112.55 1116.23 1117.46 1120.11 1121.05 1121.50  
1121.94 1122.47 1137.06 1138.89 1139.27 1141.42  
1161.34 1166.87 1184.04 1189.38 1198.26 1199.39  
1200.09 1202.57 1203.18 1203.85 1204.10 1211.09  
1215.75 1217.68 1219.08 1222.32 1227.52 1228.55  
1229.29 1254.37 1255.32 1276.51 1295.04 1303.58  
1325.96 1326.52 1328.18 1333.28 1333.80 1343.54  
1345.68 1361.01 1363.71 1368.00 1370.21 1373.50  
1373.80 1385.51 1386.59 1407.63 1419.07 1444.77  
1446.77 1467.48 1472.92 1474.23 1474.47 1477.39  
1478.74 1479.34 1485.70 1494.48 1499.33 1505.87  
1506.43 1512.61 1519.25 1523.82 1524.59 1526.87  
1527.20 1536.27 1552.03 1552.62 1610.73 1621.49  
1624.17 1624.83 1626.90 1627.42 1640.70 1641.05  
1642.66 1643.15 1643.88 1644.53 1644.94 1650.97  
1662.03 1666.40 3012.72 3047.60 3048.54 3107.81  
3108.12 3121.31 3162.55 3179.53 3180.58 3180.99  
3182.10 3183.55 3184.97 3186.05 3189.88 3191.65  
3191.92 3192.98 3194.92 3197.91 3198.79 3199.06  
3199.44 3200.00 3202.21 3205.53 3206.85 3209.25  
3209.71 3210.08 3210.47 3210.92 3212.16 3214.11  
3216.21 3217.12 3218.49 3218.91 3221.99 3222.25  
3225.29 3231.82 3234.91

III<sub>sc</sub>-TS

-131.79 10.41 13.23 17.08 33.07 36.93  
38.96 40.47 44.35 46.96 53.05 56.31  
59.62 61.31 63.92 67.72 69.72 79.92  
81.22 83.60 91.05 94.63 99.44 101.48  
105.97 117.63 120.11 125.69 129.89 134.35  
143.07 144.54 153.17 167.76 173.30 184.36  
192.34 199.10 207.28 215.35 226.64 228.45  
234.41 235.65 248.16 256.50 262.76 266.22  
269.12 287.24 298.70 311.99 319.87 327.24  
334.87 348.75 355.37 406.29 408.63 413.16  
415.11 417.64 420.49 426.47 431.48 438.05  
440.97 446.15 447.87 453.41 462.70 480.08  
488.08 507.61 512.76 518.59 522.40 529.73  
538.66 555.02 556.78 573.14 581.83 599.36  
612.61 620.91 623.96 626.00 627.16 628.64  
630.16 630.85 632.17 644.12 696.79 698.10  
702.37 709.13 710.25 712.26 713.36 716.74  
719.34 724.91 726.10 736.93 753.23 755.05  
757.83 762.22 764.89 766.96 768.13 769.08  
773.11 775.34 779.96 790.20 828.01 829.64  
830.85 862.99 866.58 867.66 871.04 871.67  
873.21 879.87 884.03 896.33 909.95 911.13  
940.11 940.68 945.01 948.75 949.61 951.38  
951.98 958.68 964.07 964.71 968.15 978.16  
983.78 990.40 991.37 991.88 995.27 996.59  
1004.09 1009.44 1011.69 1013.23 1013.87 1014.21  
1014.79 1016.74 1017.13 1018.37 1019.51 1030.75  
1035.34 1038.90 1050.74 1051.04 1053.33 1053.76  
1061.06 1067.41 1068.21 1087.05 1111.95 1113.64  
1116.70 1117.00 1117.56 1118.02 1119.81 1122.14  
1123.70 1123.98 1136.59 1138.64 1141.20 1146.73  
1163.59 1164.93 1183.05 1187.41 1199.39 1201.23  
1201.50 1202.31 1202.39 1202.88 1205.80 1209.32  
1212.78 1215.35 1219.28 1221.16 1223.22 1227.83  
1228.77 1241.79 1250.25 1273.49 1293.10 1300.65  
1321.60 1323.12 1324.70 1329.45 1331.75 1333.28  
1338.33 1362.37 1364.49 1366.77 1369.10 1369.94  
1372.44 1384.46 1388.44 1395.16 1417.34 1443.46  
1445.70 1468.00 1474.01 1474.36 1479.25 1479.48  
1481.40 1483.93 1484.66 1492.60 1496.03 1503.49  
1506.39 1518.49 1524.33 1524.99 1526.02 1527.42  
1535.48 1553.83 1554.12 1564.28 1615.27 1624.14  
1624.58 1626.95 1627.31 1633.64 1641.51 1641.72  
1643.29 1643.61 1644.16 1645.11 1645.84 1657.31  
1664.79 1668.22 3019.05 3039.13 3042.18 3103.13  
3105.93 3118.04 3124.82 3159.95 3163.34 3177.82  
3179.47 3180.45 3180.93 3183.83 3186.50 3186.59  
3187.15 3189.45 3191.62 3193.01 3193.79 3195.52  
3197.47 3197.55 3199.44 3200.64 3201.79 3204.25

3205.12 3207.26 3208.44 3209.98 3211.03 3211.38  
3212.28 3215.08 3215.60 3216.23 3217.30 3220.55  
3227.63 3231.31 3232.95

V<sub>sc</sub>

0.69 16.79 18.97 22.79 27.59 29.80  
34.02 36.67 37.24 40.37 46.94 51.12  
51.87 55.88 58.93 60.99 65.67 66.85  
71.11 75.52 77.64 85.61 93.17 102.31  
107.00 110.82 114.00 128.81 137.18 140.05  
144.84 156.79 171.48 183.52 187.81 194.12  
208.32 215.10 217.02 222.47 225.66 228.94  
232.24 247.57 252.21 259.48 259.75 267.21  
272.18 300.01 307.62 314.53 326.57 329.27  
334.26 348.15 409.48 410.10 415.86 416.43  
417.05 418.05 425.39 427.79 438.88 440.35  
442.72 459.18 470.07 478.77 485.04 487.99  
509.44 514.78 515.69 525.73 528.51 552.15  
554.24 570.47 573.42 597.69 599.33 616.20  
623.11 626.41 629.66 630.54 630.75 632.30  
634.38 643.15 652.09 697.68 699.81 706.53  
709.44 710.71 711.93 714.86 715.84 717.71  
723.10 725.88 736.88 751.07 754.01 757.97  
763.38 764.07 766.56 767.12 768.55 770.15  
780.83 789.44 797.76 829.17 830.21 842.63  
860.82 864.36 865.56 867.75 870.81 871.11  
885.47 895.99 897.30 909.59 924.03 928.88  
935.77 940.41 941.05 941.80 944.41 945.03  
953.53 961.59 967.22 969.73 976.14 982.73  
984.63 987.58 988.59 1001.05 1001.92 1003.78  
1012.01 1013.13 1013.39 1014.30 1014.51 1014.68  
1014.79 1016.09 1017.44 1029.32 1032.13 1043.78  
1049.94 1050.16 1050.70 1051.82 1059.51 1068.52  
1086.92 1087.44 1097.68 1107.66 1107.96 1115.45  
1116.22 1119.71 1120.82 1121.14 1123.63 1123.70  
1127.20 1136.16 1137.54 1140.88 1143.87 1163.21  
1174.13 1195.15 1198.84 1199.15 1199.17 1201.32  
1201.59 1204.25 1204.84 1205.62 1209.16 1211.68  
1216.21 1216.82 1221.09 1223.51 1225.58 1225.75  
1240.87 1251.91 1274.07 1290.69 1297.44 1310.02  
1325.36 1325.91 1327.98 1328.25 1330.14 1343.50  
1358.64 1359.03 1360.10 1361.57 1364.40 1366.21  
1373.01 1382.10 1382.34 1389.79 1431.70 1445.72  
1447.80 1465.45 1474.91 1475.24 1477.48 1478.22  
1483.26 1490.27 1494.75 1495.81 1504.62 1506.19  
1508.10 1515.53 1522.69 1523.25 1525.34 1525.63  
1539.34 1554.19 1554.37 1615.92 1623.77 1624.39  
1625.44 1626.37 1637.29 1641.08 1642.51 1642.53  
1643.12 1643.71 1643.79 1644.11 1657.82 1663.82  
1664.48 1669.25 3041.19 3041.20 3043.73 3050.85  
3058.50 3100.33 3100.81 3124.31 3132.54 3149.18  
3154.94 3160.74 3164.83 3169.28 3174.82 3179.38  
3180.12 3180.53 3181.26 3183.62 3188.29 3188.52  
3189.23 3192.63 3193.22 3195.18 3197.00 3198.50  
3199.34 3200.32 3202.73 3204.45 3206.18 3208.77  
3208.80 3209.30 3209.77 3210.19 3210.62 3213.60  
3229.44 3229.84 3238.96

V<sub>Isc</sub>

1.95 11.35 11.82 13.70 19.18 23.58  
28.53 29.65 31.89 33.08 37.23 40.93  
44.57 46.39 50.45 53.54 54.86 57.26  
59.44 61.96 64.36 66.03 69.08 70.66  
76.01 78.05 78.15 85.06 85.72 91.97  
94.38 100.94 105.49 112.03 114.23 119.02  
122.82 127.62 146.37 150.93 152.72 157.52  
160.28 161.36 170.57 182.48 187.71 194.67  
197.77 200.61 211.71 215.39 219.40 220.92  
228.93 231.22 238.74 242.22 248.98 255.36  
257.27 261.25 261.86 265.82 285.00 303.91  
307.03 309.64 314.55 326.21 331.92 333.32  
349.27 386.67 406.57 411.67 414.61 415.16  
418.37 418.86 423.79 425.53 434.24 435.73

437.84 454.87 468.62 473.68 478.37 480.17  
481.32 501.10 508.66 512.24 516.76 521.40  
524.51 526.93 534.41 554.04 555.55 572.32  
573.54 577.71 595.54 597.87 609.60 612.72  
615.55 619.68 627.38 630.30 630.82 632.54  
633.14 634.52 637.61 644.66 694.57 697.28  
707.43 709.67 710.51 712.66 714.17 715.50  
717.50 721.40 721.89 734.47 741.41 750.54  
755.12 755.42 756.63 761.36 764.46 765.52  
768.99 772.98 774.21 783.03 798.04 801.75  
821.30 822.25 825.01 835.43 856.70 858.63  
866.68 869.01 871.65 880.30 882.77 883.50  
892.86 893.01 893.95 904.81 920.71 926.59  
933.58 935.95 937.79 940.60 950.92 953.78  
954.68 955.11 958.66 964.49 968.87 974.09  
974.29 981.29 983.51 988.27 991.78 994.09  
994.66 1001.81 1004.96 1005.44 1011.83 1013.08  
1013.59 1016.22 1016.35 1028.45 1038.57 1040.26  
1042.21 1042.55 1048.61 1049.91 1051.04 1051.94  
1054.47 1059.33 1061.17 1062.94 1066.15 1067.79  
1070.04 1072.31 1085.46 1086.85 1105.01 1105.36  
1109.02 1110.48 1110.76 1117.53 1119.61 1120.43  
1124.49 1124.57 1125.10 1131.15 1131.53 1134.55  
1141.89 1153.59 1156.09 1174.36 1192.05 1195.08  
1195.29 1195.84 1196.33 1198.74 1199.07 1202.78  
1206.85 1208.89 1214.28 1217.27 1218.62 1220.93  
1222.76 1224.67 1230.46 1231.51 1240.17 1253.55  
1270.99 1283.64 1285.94 1292.43 1309.26 1319.84  
1322.23 1323.60 1326.85 1327.57 1328.60 1333.89  
1345.21 1357.71 1362.60 1362.73 1364.99 1368.90  
1371.33 1374.46 1377.14 1383.87 1390.73 1404.22  
1420.75 1425.18 1428.40 1428.60 1442.42 1445.94  
1453.36 1463.40 1471.87 1472.93 1476.33 1476.71  
1481.59 1484.55 1490.25 1491.30 1491.54 1493.97  
1497.03 1500.87 1503.41 1505.47 1507.82 1509.57  
1513.51 1516.17 1523.08 1524.29 1528.55 1530.60  
1531.67 1539.96 1556.78 1557.55 1620.15 1620.94  
1622.03 1624.46 1626.91 1633.21 1638.75 1639.39  
1641.85 1642.95 1643.45 1644.02 1644.40 1653.69  
1659.82 1660.39 1665.50 1669.25 1669.90 1672.96  
3020.43 3022.19 3030.76 3031.67 3031.84 3038.86  
3044.51 3052.95 3076.98 3080.56 3092.00 3092.93  
3104.75 3109.27 3110.11 3116.10 3121.70 3124.71  
3145.62 3146.21 3148.24 3150.49 3160.14 3160.79  
3163.84 3165.15 3168.88 3169.42 3169.68 3174.11  
3176.05 3177.51 3180.26 3181.01 3183.08 3184.26  
3186.62 3187.32 3190.69 3194.80 3195.11 3195.89  
3196.98 3197.62 3198.25 3200.81 3204.87 3207.63  
3210.06 3210.67 3223.02 3223.80 3224.32 3252.87

V<sub>Isc-TS</sub>

-938.92 5.45 12.82 17.15 22.67 25.37  
27.05 29.83 32.46 36.53 37.92 42.42  
44.17 45.70 46.55 51.19 53.29 55.03  
57.34 58.43 62.26 65.49 68.43 75.04  
78.06 78.63 84.77 86.32 92.44 95.82  
99.20 109.25 111.42 115.59 118.18 119.05  
123.64 126.21 138.78 147.58 151.70 159.24  
166.94 169.22 172.40 181.50 184.40 190.17  
200.09 207.84 215.40 218.75 222.25 229.34  
231.40 233.52 234.04 234.98 239.15 253.19  
254.60 257.21 259.85 279.09 285.36 290.62  
296.73 305.99 315.18 326.82 329.37 332.33  
350.01 368.73 407.37 409.79 410.82 415.61  
418.78 419.78 421.57 422.37 430.29 436.85  
438.65 444.25 456.83 469.02 478.46 481.63  
485.27 487.57 502.88 509.91 511.11 519.10  
524.37 524.76 529.60 533.46 552.83 562.06  
571.66 574.20 590.35 596.90 603.58 606.34  
618.79 623.24 625.25 628.80 629.50 630.58  
632.46 633.02 639.36 640.49 657.14 694.56  
699.24 708.20 709.65 710.87 713.55 717.05  
718.60 718.82 722.62 722.80 734.71 739.20  
747.97 750.07 755.41 762.23 764.96 765.45

767.26 771.26 773.81 777.07 782.30 798.85  
802.11 805.77 812.66 823.67 827.62 859.56  
865.74 866.60 868.24 869.76 872.93 882.14  
886.46 890.94 892.32 895.26 905.58 926.91  
930.21 933.05 938.05 940.04 942.06 943.82  
954.02 955.18 958.87 969.64 969.83 972.84  
973.49 974.65 984.14 986.12 990.14 996.32  
997.32 998.95 1004.96 1005.99 1014.17 1014.97  
1015.74 1016.00 1017.70 1025.90 1028.48 1030.24  
1038.67 1045.83 1047.48 1050.46 1052.22 1052.32  
1052.57 1052.95 1061.65 1062.19 1064.13 1066.47  
1071.86 1073.09 1079.08 1088.70 1106.76 1108.85  
1110.77 1113.17 1114.15 1118.43 1119.98 1126.94  
1127.41 1127.77 1132.22 1134.71 1135.90 1138.34  
1143.94 1150.32 1155.77 1175.58 1193.57 1195.29  
1197.01 1197.22 1197.43 1197.49 1200.56 1207.81  
1208.82 1212.22 1214.44 1217.72 1218.49 1222.12  
1223.49 1224.59 1227.46 1232.14 1267.54 1271.99  
1282.51 1286.73 1288.08 1298.89 1302.97 1314.15  
1326.19 1327.36 1330.06 1331.00 1332.39 1338.74  
1342.34 1350.31 1361.22 1363.88 1364.52 1364.70  
1367.49 1376.20 1379.03 1387.94 1392.40 1419.40  
1424.10 1427.30 1433.36 1434.58 1443.43 1446.50  
1450.82 1452.06 1467.16 1474.21 1475.44 1478.41  
1478.82 1484.10 1485.45 1494.26 1495.53 1496.24  
1497.75 1498.80 1503.09 1504.12 1509.35 1511.08  
1512.37 1514.16 1515.27 1524.59 1525.66 1526.76  
1530.50 1531.40 1534.32 1540.78 1554.17 1555.43  
1621.38 1624.82 1626.49 1626.81 1627.44 1629.48  
1639.52 1643.43 1643.91 1644.98 1645.99 1646.85  
1649.32 1661.64 1663.11 1663.36 1669.26 1674.18  
1675.59 3011.53 3019.71 3030.45 3030.93 3046.18  
3048.00 3052.77 3086.18 3088.31 3095.01 3102.03  
3109.84 3118.14 3125.03 3129.81 3138.05 3155.57  
3157.89 3161.38 3163.65 3165.56 3166.50 3169.59  
3172.97 3173.98 3175.10 3176.18 3177.90 3179.03  
3181.20 3185.21 3186.41 3189.02 3190.08 3190.56  
3190.63 3195.97 3196.68 3198.30 3201.00 3201.69  
3202.47 3203.27 3208.59 3212.29 3212.60 3213.85  
3214.85 3223.99 3225.48 3225.93 3228.63 3248.38

**VII<sub>sc</sub>**

10.87 13.38 21.63 26.03 27.74 31.05  
33.28 35.31 35.57 39.58 42.16 44.14  
47.18 48.42 49.51 54.04 57.21 58.41  
60.87 63.40 66.07 68.11 72.76 79.14  
82.36 85.47 89.61 95.90 100.15 108.32  
112.65 115.98 118.34 126.72 127.97 138.76  
142.11 143.42 152.07 157.44 165.09 170.78  
182.68 185.04 185.09 196.75 204.40 213.84  
216.90 222.05 222.81 229.77 234.24 235.61  
239.53 251.36 257.29 258.47 259.50 262.03  
263.79 270.45 288.65 294.27 305.92 313.85  
322.04 323.83 327.59 330.59 348.36 358.42  
369.18 386.05 413.27 416.26 419.13 419.55  
422.14 424.69 426.58 434.70 439.79 441.57  
450.18 454.36 461.70 469.77 483.92 486.08  
491.45 502.71 509.56 514.92 517.25 528.22  
530.22 538.37 545.72 556.04 558.04 569.30  
571.88 594.64 598.32 605.24 606.61 617.16  
623.17 626.50 630.72 631.29 632.20 632.49  
633.13 639.75 640.82 670.55 695.09 699.07  
708.84 711.89 712.14 713.59 714.15 714.86  
716.44 719.23 724.58 724.81 725.06 737.62  
752.95 757.58 759.20 762.44 763.41 767.47  
770.50 772.20 778.61 786.84 796.01 801.30  
807.41 809.84 825.75 828.08 852.00 861.86  
863.29 864.42 870.07 875.11 876.35 876.53  
883.49 893.66 900.95 904.90 905.54 924.86  
927.92 939.26 940.69 942.58 944.04 949.24  
955.69 959.95 963.40 969.40 973.13 973.79  
982.48 989.46 991.31 993.86 994.96 998.42  
999.44 1012.96 1013.24 1013.87 1014.28 1015.23  
1016.67 1017.91 1019.34 1025.61 1029.87 1040.82

1042.35 1043.19 1049.01 1050.08 1050.79 1052.77  
1055.05 1058.95 1062.27 1064.97 1068.35 1070.44  
1071.40 1083.41 1088.17 1097.72 1108.94 1109.92  
1113.73 1114.43 1115.42 1121.68 1124.88 1126.75  
1128.05 1129.29 1131.50 1132.29 1134.75 1143.86  
1148.77 1148.83 1155.55 1168.55 1190.08 1193.94  
1195.54 1197.13 1198.14 1199.09 1199.74 1206.51  
1210.07 1214.28 1219.73 1220.66 1222.41 1222.84  
1223.13 1227.40 1231.41 1244.26 1271.88 1285.79  
1287.86 1292.99 1294.58 1308.02 1314.56 1321.41  
1321.71 1326.91 1328.28 1329.71 1330.17 1332.15  
1360.75 1363.27 1364.82 1366.01 1366.46 1367.24  
1370.31 1371.51 1376.35 1389.81 1402.03 1419.51  
1426.23 1429.05 1431.75 1444.28 1446.87 1451.07  
1463.80 1466.48 1473.16 1474.03 1477.26 1477.61  
1482.39 1483.62 1488.26 1490.90 1494.22 1499.62  
1499.98 1501.18 1504.05 1510.32 1511.31 1515.49  
1520.34 1520.53 1525.15 1525.26 1527.11 1527.53  
1528.62 1538.26 1552.74 1553.51 1570.12 1613.23  
1613.52 1621.89 1624.93 1625.09 1627.70 1633.86  
1642.65 1642.85 1643.24 1643.67 1645.48 1646.46  
1656.37 1657.28 1660.42 1664.93 1670.15 1682.40  
2459.95 2982.60 3029.38 3031.87 3032.13 3034.06  
3050.18 3056.08 3085.65 3092.70 3096.47 3107.79  
3116.38 3118.61 3121.01 3127.74 3129.11 3141.62  
3154.96 3157.75 3161.88 3165.79 3167.62 3168.17  
3169.35 3169.50 3173.69 3174.82 3179.08 3179.70  
3179.75 3184.69 3186.35 3187.69 3188.05 3188.06  
3189.88 3194.21 3194.61 3195.09 3198.66 3199.14  
3200.42 3201.46 3203.45 3204.71 3207.96 3208.44  
3210.90 3215.42 3218.77 3223.91 3224.68 3229.90

**VII<sub>sc</sub>-TS**

-637.04 10.30 15.95 17.96 24.68 26.04  
28.22 30.16 34.47 36.79 38.28 43.70  
46.21 47.54 48.45 49.99 55.56 56.68  
58.56 61.67 64.50 70.22 71.44 78.65  
79.16 82.88 88.42 95.26 98.26 102.88  
109.47 111.17 115.89 120.14 126.20 133.64  
146.10 148.58 152.03 155.98 160.75 171.14  
171.61 182.59 184.12 186.37 198.92 209.89  
215.81 218.39 220.72 224.37 229.47 231.50  
235.48 244.83 250.21 253.06 256.82 262.29  
264.28 268.88 272.06 288.56 305.07 306.61  
312.82 326.85 327.67 331.96 338.74 349.71  
364.95 379.69 408.20 413.95 414.83 417.65  
419.81 422.66 424.15 430.00 441.22 444.37  
445.89 453.67 462.44 466.90 468.70 483.10  
489.53 502.94 509.00 515.55 516.11 523.20  
526.79 537.92 541.83 547.65 553.41 559.81  
572.67 573.00 593.49 599.10 605.29 608.81  
623.14 625.99 630.56 631.12 632.56 632.78  
633.49 636.30 643.80 656.43 696.17 699.98  
703.81 708.46 710.50 712.76 713.71 715.42  
716.84 720.69 723.55 724.92 727.24 735.30  
736.14 754.24 758.51 762.14 763.28 765.01  
765.49 770.37 771.45 780.42 789.46 791.59  
806.31 814.97 819.35 820.23 826.96 850.14  
866.25 866.41 867.37 869.47 874.34 876.21  
876.50 881.56 893.19 899.16 905.68 909.97  
929.26 929.76 933.27 940.59 942.65 943.86  
948.56 954.35 960.88 969.54 971.95 975.18  
977.59 983.02 989.06 989.85 994.23 995.52  
996.56 998.00 1006.93 1011.10 1012.90 1013.44  
1014.70 1016.63 1017.61 1018.62 1021.14 1031.07  
1039.46 1041.73 1045.28 1048.45 1051.49 1052.90  
1054.22 1056.84 1058.31 1061.33 1064.09 1068.29  
1069.33 1073.86 1089.51 1091.15 1093.00 1111.63  
1111.93 1115.34 1117.05 1117.40 1126.46 1126.92  
1130.34 1130.77 1132.56 1134.66 1137.84 1144.06  
1144.38 1149.70 1158.07 1160.99 1187.96 1194.02  
1197.27 1199.00 1199.12 1200.86 1201.33 1206.53  
1208.02 1210.61 1212.84 1220.98 1223.59 1224.32  
1224.48 1229.31 1232.00 1243.76 1274.87 1286.93

1288.35 1288.90 1298.98 1312.80 1315.11 1323.46  
 1324.73 1325.83 1328.82 1332.08 1334.37 1334.46  
 1356.22 1362.77 1366.14 1368.14 1368.58 1370.42  
 1370.70 1379.16 1387.04 1394.82 1407.82 1424.57  
 1425.58 1427.86 1428.58 1430.82 1445.19 1447.82  
 1450.44 1466.68 1473.38 1475.41 1476.32 1479.95  
 1480.21 1485.68 1486.55 1487.72 1492.70 1495.90  
 1497.98 1500.66 1502.99 1503.81 1510.54 1514.26  
 1517.17 1520.00 1521.08 1526.85 1528.69 1529.05  
 1529.30 1535.73 1552.53 1554.53 1559.88 1591.15  
 1614.27 1619.89 1623.65 1627.48 1628.01 1630.31  
 1630.61 1643.93 1644.89 1645.74 1646.02 1647.76  
 1649.83 1653.31 1661.22 1662.58 1668.60 1674.54  
 1692.67 2996.20 3027.49 3031.12 3031.97 3035.02  
 3046.33 3053.98 3085.91 3088.38 3091.82 3097.24  
 3108.33 3111.57 3120.68 3127.76 3132.72 3135.83  
 3152.10 3156.88 3159.74 3160.84 3162.14 3168.25  
 3169.79 3171.37 3175.92 3176.02 3176.53 3177.71  
 3184.92 3185.76 3186.11 3190.37 3191.52 3192.85  
 3193.82 3194.73 3195.02 3196.69 3197.03 3201.24  
 3201.40 3205.51 3208.19 3210.93 3212.37 3214.21  
 3214.29 3215.89 3218.32 3224.93 3231.72 3233.80

VIII<sub>sc</sub>

11.70 16.86 19.22 24.61 34.19 35.32  
 36.92 40.86 43.21 45.66 48.10 53.61  
 53.95 55.85 59.63 61.19 62.82 64.36  
 68.30 70.16 71.41 73.05 77.64 85.22  
 87.13 93.12 96.14 102.97 108.28 110.89  
 113.54 116.21 119.06 122.31 127.10 131.40  
 140.29 144.25 148.23 158.99 162.68 173.39  
 179.96 184.46 185.26 187.68 202.39 216.86  
 219.53 220.49 223.31 226.01 229.58 234.72  
 245.38 253.79 254.38 260.12 261.82 268.11  
 268.98 277.36 296.92 300.08 307.86 315.08  
 329.09 333.99 337.64 345.73 352.69 364.69  
 383.54 400.07 405.79 417.38 418.14 419.98  
 422.00 424.70 428.87 433.73 442.48 442.88  
 443.44 454.31 456.93 470.03 473.07 481.88  
 484.97 506.43 510.27 512.42 516.84 523.64  
 527.27 539.11 540.46 552.14 553.57 568.04  
 575.65 588.25 599.26 600.87 608.78 615.54  
 620.87 624.05 626.64 630.31 631.25 632.88  
 633.24 634.55 644.05 664.15 696.80 702.31  
 703.23 709.26 712.47 713.53 715.42 715.74  
 717.84 721.46 721.94 725.00 728.17 736.06  
 754.92 759.10 764.50 764.58 766.63 769.49  
 770.81 774.49 777.08 784.25 793.97 803.85  
 812.03 818.01 826.42 826.98 843.40 864.97  
 866.06 874.19 875.25 875.47 878.16 879.25  
 883.91 891.90 893.87 898.40 905.72 933.92  
 940.60 942.01 942.15 945.67 950.57 954.97  
 955.46 955.47 973.72 973.97 974.00 976.75  
 986.04 990.50 993.60 995.43 997.18 1004.27  
 1009.95 1010.88 1011.91 1012.77 1014.19 1015.25  
 1018.66 1019.74 1023.86 1029.67 1030.84 1039.62  
 1040.00 1040.22 1047.33 1047.87 1051.18 1054.29  
 1054.85 1062.41 1062.45 1064.55 1067.49 1070.70  
 1074.95 1088.15 1092.23 1097.44 1109.79 1111.54  
 1113.01 1116.32 1116.45 1121.15 1121.74 1123.47  
 1126.10 1129.11 1135.22 1138.86 1139.88 1142.28  
 1144.03 1154.67 1157.81 1179.43 1196.43 1196.73  
 1197.76 1197.92 1200.47 1201.24 1204.23 1204.90  
 1206.01 1208.48 1214.40 1219.03 1222.02 1227.90  
 1231.10 1232.09 1233.01 1248.60 1274.53 1278.99  
 1285.53 1289.06 1301.40 1305.85 1306.02 1309.02  
 1321.77 1324.42 1329.54 1330.43 1332.06 1337.83  
 1349.85 1361.17 1363.42 1368.01 1370.80 1371.20  
 1373.63 1378.73 1386.22 1396.17 1406.84 1425.13  
 1427.55 1427.86 1430.42 1444.58 1446.55 1447.61  
 1466.34 1467.02 1473.97 1474.58 1474.85 1478.69  
 1479.87 1485.96 1486.87 1491.37 1496.68 1497.14  
 1498.46 1500.16 1502.44 1502.63 1510.59 1515.34  
 1517.91 1520.33 1524.81 1527.27 1528.10 1530.10

1531.63 1540.81 1553.41 1555.92 1597.06 1602.27  
 1602.67 1622.87 1625.56 1627.92 1628.24 1630.64  
 1636.41 1637.62 1642.42 1644.97 1646.30 1647.09  
 1648.77 1656.43 1660.20 1668.32 1670.20 1674.87  
 2484.03 2999.22 3016.02 3028.68 3029.42 3038.68  
 3048.90 3049.47 3078.76 3080.10 3088.50 3107.42  
 3115.37 3117.12 3118.27 3126.07 3126.62 3137.83  
 3138.29 3155.89 3158.09 3158.93 3159.27 3160.94  
 3166.37 3166.69 3168.89 3169.92 3175.16 3178.39  
 3178.72 3179.11 3183.41 3185.88 3189.31 3190.37  
 3190.52 3193.25 3194.38 3194.72 3197.87 3197.95  
 3199.65 3202.56 3210.57 3212.82 3213.33 3214.73  
 3216.57 3223.49 3224.96 3232.12 3239.94 3267.19

IV<sub>s</sub>

10.17 13.10 26.21 30.94 35.15 37.45  
 40.03 47.30 52.49 54.07 55.73 59.69  
 61.11 61.41 67.83 71.00 76.50 80.88  
 84.21 89.35 91.49 98.31 100.38 103.55  
 106.29 113.98 116.72 121.41 130.69 132.03  
 138.39 155.94 168.92 174.12 179.33 184.86  
 187.55 198.77 205.05 216.94 226.35 230.14  
 231.22 234.44 243.36 256.59 261.19 262.36  
 266.17 280.33 308.62 309.06 318.12 326.90  
 335.39 348.43 360.75 408.65 412.81 414.59  
 416.54 418.57 421.32 425.15 427.76 440.92  
 444.25 448.20 451.47 454.98 462.31 480.64  
 487.01 507.13 512.34 516.25 520.74 529.20  
 549.78 552.62 556.63 566.50 571.65 591.12  
 598.89 619.68 620.91 624.98 626.21 627.58  
 628.49 629.48 631.83 637.84 693.56 695.44  
 701.25 706.78 707.87 711.91 712.35 714.20  
 716.91 722.78 723.78 733.58 735.43 752.45  
 757.18 760.16 760.58 762.11 765.17 767.97  
 768.22 769.25 786.35 788.72 791.30 826.63  
 833.66 861.62 863.61 864.39 865.32 868.91  
 869.72 874.36 877.39 885.40 893.74 895.57  
 907.90 911.24 940.80 941.53 945.20 947.95  
 953.81 957.16 960.77 962.45 964.62 968.12  
 980.94 986.44 988.27 991.91 993.71 998.32  
 1007.01 1007.33 1008.32 1009.72 1010.64 1012.33  
 1012.80 1013.11 1013.74 1016.61 1019.74 1027.78  
 1030.47 1031.18 1036.29 1046.43 1047.96 1050.92  
 1052.08 1057.76 1065.86 1086.71 1099.57 1112.44  
 1113.66 1116.23 1116.52 1117.36 1119.54 1121.14  
 1123.46 1136.90 1138.26 1141.86 1142.92 1144.11  
 1153.82 1163.47 1164.98 1182.49 1200.12 1201.37  
 1201.44 1202.16 1202.47 1203.61 1205.23 1211.36  
 1215.23 1218.09 1219.61 1224.51 1227.69 1228.59  
 1229.51 1242.80 1270.58 1274.31 1295.34 1303.87  
 1314.20 1325.65 1327.66 1333.50 1334.55 1354.72  
 1362.79 1365.92 1368.43 1368.74 1369.35 1372.91  
 1380.40 1386.13 1390.85 1399.78 1404.86 1414.99  
 1443.76 1445.78 1467.98 1474.17 1474.78 1475.06  
 1479.32 1480.01 1485.18 1488.12 1489.71 1497.83  
 1505.39 1505.73 1523.28 1524.60 1525.40 1528.44  
 1535.66 1541.79 1552.21 1553.65 1570.19 1609.47  
 1624.83 1625.93 1628.21 1629.08 1640.64 1642.28  
 1643.47 1644.53 1644.83 1645.47 1646.11 1655.40  
 1662.57 1668.08 3007.36 3042.80 3043.24 3104.01  
 3116.54 3123.86 3165.66 3171.09 3175.42 3176.36  
 3178.14 3179.38 3181.62 3182.96 3185.28 3186.69  
 3189.42 3190.16 3193.16 3193.17 3193.87 3194.50  
 3196.58 3199.58 3200.77 3201.55 3202.14 3205.87  
 3206.88 3208.49 3209.58 3211.34 3211.59 3214.48  
 3216.52 3218.69 3219.03 3225.43 3226.47 3228.63  
 3231.20 3242.00 3243.38

III<sub>SN-TS'</sub>

-59.90 11.18 17.13 28.46 34.51 37.42  
 38.42 41.80 48.07 48.24 54.48 55.91  
 57.49 61.04 65.78 69.26 75.11 76.40  
 80.20 88.83 91.24 95.62 100.05 103.85

|         |         |         |         |         |         |
|---------|---------|---------|---------|---------|---------|
| 106.38  | 111.90  | 113.93  | 118.55  | 128.07  | 132.80  |
| 141.00  | 147.11  | 166.63  | 168.33  | 175.28  | 184.20  |
| 188.45  | 202.51  | 205.13  | 217.03  | 224.42  | 226.88  |
| 230.01  | 237.42  | 242.43  | 254.67  | 261.67  | 262.54  |
| 266.89  | 280.58  | 312.02  | 316.60  | 319.21  | 327.59  |
| 335.62  | 348.29  | 353.81  | 407.22  | 409.87  | 411.83  |
| 414.66  | 418.76  | 422.79  | 424.14  | 425.76  | 442.81  |
| 444.64  | 446.25  | 453.24  | 457.35  | 463.67  | 481.14  |
| 488.61  | 506.80  | 510.43  | 514.23  | 518.85  | 530.51  |
| 543.95  | 556.45  | 567.95  | 568.81  | 571.77  | 592.26  |
| 599.68  | 621.03  | 622.24  | 624.31  | 626.15  | 628.26  |
| 630.16  | 631.92  | 632.36  | 641.57  | 692.04  | 696.54  |
| 697.50  | 708.19  | 709.12  | 711.83  | 712.64  | 717.58  |
| 718.25  | 724.85  | 727.80  | 737.49  | 739.85  | 751.27  |
| 753.24  | 758.21  | 760.91  | 763.29  | 767.04  | 769.48  |
| 770.04  | 779.78  | 784.79  | 787.50  | 792.35  | 826.04  |
| 828.87  | 835.32  | 840.68  | 865.97  | 866.49  | 868.94  |
| 869.58  | 870.22  | 876.05  | 878.54  | 886.65  | 897.41  |
| 898.40  | 910.21  | 939.80  | 941.12  | 946.40  | 952.88  |
| 956.40  | 958.18  | 958.69  | 962.91  | 963.33  | 968.82  |
| 984.98  | 986.69  | 990.90  | 992.64  | 994.29  | 998.59  |
| 1001.49 | 1008.82 | 1010.44 | 1011.67 | 1012.19 | 1013.23 |
| 1013.66 | 1014.27 | 1016.91 | 1017.51 | 1019.06 | 1020.17 |
| 1032.31 | 1035.41 | 1048.71 | 1049.90 | 1051.10 | 1052.30 |
| 1053.18 | 1057.29 | 1067.20 | 1087.96 | 1097.79 | 1102.35 |
| 1112.20 | 1112.53 | 1116.67 | 1117.38 | 1118.10 | 1121.95 |
| 1123.41 | 1124.58 | 1138.64 | 1139.04 | 1142.44 | 1142.96 |
| 1145.53 | 1163.74 | 1164.05 | 1180.93 | 1199.92 | 1200.98 |
| 1201.08 | 1202.63 | 1202.84 | 1203.41 | 1205.55 | 1212.85 |
| 1215.34 | 1216.93 | 1218.91 | 1221.97 | 1226.99 | 1228.76 |
| 1230.22 | 1247.33 | 1275.57 | 1276.59 | 1296.16 | 1304.82 |
| 1323.22 | 1325.31 | 1333.18 | 1333.82 | 1350.87 | 1357.83 |
| 1362.60 | 1362.84 | 1364.90 | 1368.27 | 1368.55 | 1370.23 |
| 1374.21 | 1382.04 | 1386.51 | 1397.83 | 1413.07 | 1424.17 |
| 1443.89 | 1446.47 | 1467.93 | 1473.44 | 1474.26 | 1474.60 |
| 1480.11 | 1480.47 | 1486.81 | 1487.76 | 1490.22 | 1498.62 |
| 1506.10 | 1506.66 | 1523.88 | 1524.15 | 1525.58 | 1526.14 |
| 1529.37 | 1537.64 | 1553.85 | 1554.39 | 1565.15 | 1609.14 |
| 1623.98 | 1624.22 | 1628.54 | 1628.83 | 1641.88 | 1642.54 |
| 1643.15 | 1643.18 | 1644.76 | 1645.21 | 1646.04 | 1646.96 |
| 1663.24 | 1669.21 | 2975.58 | 3044.04 | 3045.95 | 3101.09 |
| 3106.19 | 3118.76 | 3162.48 | 3163.55 | 3169.73 | 3169.76 |
| 3172.25 | 3175.09 | 3180.80 | 3181.71 | 3182.03 | 3183.80 |
| 3187.10 | 3188.39 | 3190.01 | 3190.20 | 3190.87 | 3191.87 |
| 3196.37 | 3197.87 | 3198.45 | 3199.63 | 3199.97 | 3204.56 |
| 3204.88 | 3207.72 | 3208.64 | 3209.97 | 3211.57 | 3215.87 |
| 3216.91 | 3217.31 | 3217.55 | 3218.13 | 3221.09 | 3223.03 |
| 3229.58 | 3238.14 | 3240.21 |         |         |         |

III<sub>sc</sub>-TS'

|        |        |        |        |        |        |
|--------|--------|--------|--------|--------|--------|
| -16.51 | 12.09  | 18.61  | 24.64  | 33.94  | 35.13  |
| 37.97  | 42.98  | 47.44  | 51.57  | 54.73  | 55.92  |
| 56.75  | 60.28  | 65.29  | 68.64  | 70.39  | 77.98  |
| 78.61  | 83.79  | 90.80  | 94.92  | 96.16  | 102.24 |
| 105.19 | 111.63 | 117.16 | 118.51 | 131.67 | 139.12 |
| 144.45 | 154.02 | 167.05 | 168.14 | 173.28 | 184.27 |
| 185.76 | 192.68 | 204.99 | 214.15 | 229.04 | 232.13 |
| 235.10 | 240.16 | 245.54 | 257.37 | 260.92 | 266.77 |
| 268.40 | 287.05 | 306.71 | 319.02 | 322.55 | 335.58 |
| 342.83 | 348.00 | 366.75 | 408.09 | 412.51 | 414.32 |
| 416.21 | 421.63 | 423.32 | 425.62 | 431.47 | 436.90 |
| 441.95 | 448.29 | 450.16 | 456.31 | 463.85 | 481.55 |
| 486.99 | 505.83 | 510.99 | 518.17 | 523.24 | 529.83 |
| 548.51 | 555.09 | 564.56 | 566.30 | 570.50 | 598.71 |
| 607.27 | 620.03 | 621.19 | 625.02 | 625.79 | 626.38 |
| 628.57 | 629.92 | 631.70 | 637.87 | 693.33 | 694.89 |
| 699.87 | 705.27 | 710.41 | 711.84 | 712.84 | 715.56 |
| 715.82 | 722.73 | 723.62 | 730.59 | 736.10 | 751.89 |
| 757.19 | 760.80 | 762.37 | 765.61 | 767.58 | 768.80 |
| 770.26 | 772.28 | 781.69 | 787.29 | 793.70 | 827.31 |
| 834.70 | 861.36 | 862.32 | 863.57 | 869.62 | 870.24 |
| 872.38 | 877.89 | 881.85 | 888.41 | 895.31 | 896.39 |
| 905.04 | 908.69 | 940.20 | 941.44 | 943.22 | 948.57 |
| 954.44 | 956.74 | 958.35 | 963.00 | 963.87 | 967.05 |

|         |         |         |         |         |         |
|---------|---------|---------|---------|---------|---------|
| 979.48  | 984.56  | 988.63  | 990.96  | 992.99  | 999.12  |
| 1006.62 | 1008.35 | 1009.77 | 1011.23 | 1012.59 | 1013.22 |
| 1013.49 | 1013.88 | 1016.72 | 1020.31 | 1021.40 | 1024.65 |
| 1025.29 | 1032.39 | 1032.55 | 1046.79 | 1048.36 | 1050.73 |
| 1053.49 | 1058.76 | 1065.50 | 1087.24 | 1101.16 | 1110.44 |
| 1113.59 | 1113.76 | 1115.68 | 1117.95 | 1119.13 | 1119.35 |
| 1125.77 | 1138.10 | 1139.36 | 1140.02 | 1142.85 | 1146.22 |
| 1162.05 | 1163.71 | 1173.64 | 1200.10 | 1200.47 | 1200.90 |
| 1201.57 | 1202.64 | 1203.17 | 1203.84 | 1205.84 | 1212.88 |
| 1214.03 | 1216.29 | 1217.96 | 1221.86 | 1229.43 | 1229.59 |
| 1233.91 | 1239.96 | 1276.87 | 1287.69 | 1296.65 | 1298.48 |
| 1304.86 | 1323.30 | 1327.89 | 1331.75 | 1335.42 | 1351.60 |
| 1361.39 | 1361.97 | 1364.40 | 1368.56 | 1369.09 | 1375.01 |
| 1379.44 | 1387.34 | 1390.28 | 1394.30 | 1407.31 | 1414.72 |
| 1443.82 | 1446.07 | 1468.08 | 1468.64 | 1473.85 | 1475.10 |
| 1479.25 | 1479.37 | 1480.72 | 1487.46 | 1489.75 | 1498.52 |
| 1504.61 | 1508.29 | 1522.77 | 1524.11 | 1525.88 | 1528.41 |
| 1530.07 | 1534.60 | 1553.72 | 1554.00 | 1583.62 | 1611.51 |
| 1623.88 | 1626.72 | 1628.31 | 1629.14 | 1642.56 | 1642.62 |
| 1643.83 | 1644.29 | 1644.56 | 1645.19 | 1646.00 | 1651.04 |
| 1663.81 | 1669.01 | 2999.36 | 3045.70 | 3046.06 | 3105.21 |
| 3121.15 | 3132.20 | 3172.38 | 3174.37 | 3179.62 | 3181.09 |
| 3181.88 | 3182.34 | 3184.23 | 3184.83 | 3188.36 | 3189.65 |
| 3189.90 | 3193.37 | 3193.58 | 3194.30 | 3197.08 | 3199.74 |
| 3200.20 | 3200.25 | 3201.07 | 3201.62 | 3204.56 | 3206.16 |
| 3208.72 | 3209.40 | 3209.97 | 3212.41 | 3212.91 | 3215.71 |
| 3217.68 | 3220.42 | 3221.94 | 3225.68 | 3229.20 | 3229.23 |
| 3232.61 | 3242.33 | 3244.54 |         |         |         |

I<sub>s</sub>-TS''

|         |         |         |         |         |         |
|---------|---------|---------|---------|---------|---------|
| -273.61 | 13.26   | 18.99   | 27.28   | 28.53   | 31.54   |
| 33.65   | 35.19   | 37.88   | 39.84   | 41.60   | 45.89   |
| 48.48   | 53.06   | 53.79   | 57.04   | 59.36   | 63.14   |
| 67.93   | 72.82   | 79.49   | 80.71   | 83.43   | 86.99   |
| 93.59   | 94.77   | 100.79  | 106.14  | 110.24  | 117.24  |
| 128.10  | 137.00  | 140.06  | 145.31  | 148.50  | 156.91  |
| 168.31  | 171.13  | 177.09  | 184.75  | 188.02  | 193.12  |
| 196.38  | 206.41  | 213.29  | 218.32  | 223.45  | 224.77  |
| 232.78  | 234.95  | 238.39  | 246.97  | 251.04  | 262.13  |
| 265.39  | 272.81  | 284.90  | 304.47  | 312.40  | 312.74  |
| 326.05  | 326.88  | 332.02  | 350.15  | 369.75  | 386.34  |
| 410.18  | 412.47  | 415.80  | 417.22  | 419.15  | 421.29  |
| 422.53  | 430.40  | 433.33  | 435.97  | 443.12  | 451.73  |
| 463.73  | 475.88  | 481.03  | 494.14  | 509.32  | 513.11  |
| 515.12  | 515.46  | 528.08  | 531.08  | 540.18  | 552.08  |
| 552.58  | 570.47  | 573.39  | 576.54  | 591.33  | 596.29  |
| 599.01  | 606.05  | 623.07  | 626.65  | 628.17  | 629.73  |
| 632.63  | 633.39  | 641.48  | 647.59  | 696.19  | 697.87  |
| 709.92  | 710.56  | 711.23  | 712.42  | 715.37  | 716.67  |
| 719.51  | 722.21  | 723.88  | 733.24  | 734.86  | 752.92  |
| 758.68  | 761.99  | 765.47  | 767.44  | 768.34  | 768.44  |
| 769.44  | 770.57  | 789.12  | 794.29  | 827.00  | 827.67  |
| 828.25  | 859.84  | 871.28  | 872.78  | 873.16  | 874.74  |
| 879.16  | 880.40  | 883.76  | 893.05  | 897.00  | 898.78  |
| 907.49  | 918.72  | 939.67  | 940.75  | 943.57  | 946.19  |
| 946.57  | 951.81  | 952.64  | 963.04  | 971.79  | 974.72  |
| 978.42  | 979.29  | 991.29  | 993.26  | 993.90  | 996.91  |
| 1012.03 | 1012.78 | 1013.22 | 1014.65 | 1018.16 | 1018.70 |
| 1019.19 | 1020.93 | 1028.47 | 1028.53 | 1040.07 | 1044.04 |
| 1048.67 | 1052.17 | 1054.00 | 1054.56 | 1055.58 | 1061.78 |
| 1063.64 | 1067.48 | 1071.34 | 1076.04 | 1083.70 | 1088.57 |
| 1106.54 | 1110.19 | 1110.97 | 1113.24 | 1115.93 | 1120.21 |
| 1120.86 | 1124.22 | 1125.51 | 1132.02 | 1137.52 | 1140.03 |
| 1146.34 | 1147.92 | 1155.78 | 1184.46 | 1188.53 | 1190.89 |
| 1196.12 | 1198.23 | 1198.49 | 1200.65 | 1200.87 | 1209.57 |
| 1212.05 | 1212.81 | 1223.46 | 1224.78 | 1234.07 | 1234.11 |
| 1239.55 | 1244.88 | 1273.38 | 1286.82 | 1289.36 | 1294.65 |
| 1302.63 | 1321.50 | 1327.51 | 1328.33 | 1330.67 | 1333.48 |
| 1335.09 | 1357.35 | 1367.50 | 1368.37 | 1368.77 | 1373.80 |
| 1375.96 | 1377.17 | 1407.85 | 1426.15 | 1432.05 | 1435.66 |
| 1444.44 | 1447.58 | 1452.34 | 1465.48 | 1470.23 | 1474.70 |
| 1475.47 | 1478.43 | 1479.35 | 1483.01 | 1486.04 | 1492.99 |
| 1495.18 | 1498.65 | 1500.69 | 1501.62 | 1506.52 | 1506.84 |
| 1514.43 | 1524.88 | 1526.03 | 1528.80 | 1530.52 | 1531.21 |

1536.94 1552.65 1553.04 1583.69 1618.90 1625.85  
1625.97 1627.83 1628.87 1644.64 1645.38 1645.92  
1646.38 1646.93 1648.97 1649.14 1657.66 1659.47  
1668.73 1673.24 1756.63 3031.82 3032.54 3034.72  
3051.81 3053.18 3089.94 3091.88 3092.45 3119.72  
3120.71 3122.52 3128.72 3138.05 3153.73 3159.38  
3160.52 3164.33 3169.60 3169.98 3172.61 3173.69  
3179.58 3182.65 3184.13 3184.34 3189.75 3190.51  
3192.39 3192.90 3196.88 3197.55 3199.69 3203.58  
3205.87 3207.49 3208.97 3211.23 3211.93 3214.98  
3221.68 3222.40 3228.64 3235.28 3248.59 3293.80

**Xs**

10.81 25.08 28.08 30.45 34.87 36.53  
40.18 43.35 45.13 50.20 55.43 56.63  
58.63 65.14 73.89 80.89 81.55 92.62  
98.91 105.06 110.16 116.30 130.12 138.12  
144.69 151.48 161.27 171.18 180.91 196.67  
197.62 210.00 216.31 224.67 226.52 230.08  
234.00 251.99 259.76 261.70 280.84 293.01  
307.31 317.07 332.20 336.83 345.94 400.52  
406.74 410.28 412.68 418.29 419.64 428.84  
429.92 437.62 441.13 450.07 461.18 468.44  
486.09 493.55 509.08 509.39 515.01 521.20  
526.95 549.56 561.76 572.07 580.77 595.47  
619.52 621.25 624.23 627.39 628.68 630.18  
630.52 633.59 641.57 698.45 699.86 704.59  
707.32 708.47 711.32 716.49 719.80 727.10  
732.26 734.93 749.97 752.21 755.26 758.63  
760.09 763.79 765.32 765.56 769.68 771.32  
790.01 831.26 835.01 859.01 864.62 865.49  
868.54 871.10 874.79 881.55 889.93 896.60  
912.79 941.01 943.44 943.81 946.11 948.10  
948.54 949.13 953.08 963.56 964.68 979.27  
986.95 987.23 988.67 993.68 1012.46 1013.07  
1013.82 1014.24 1018.45 1019.15 1019.82 1020.27  
1032.56 1042.68 1050.42 1050.98 1051.77 1052.82  
1063.89 1084.78 1096.48 1110.90 1115.69 1117.75  
1118.24 1119.98 1121.37 1123.70 1126.23 1128.59  
1135.54 1139.71 1141.32 1143.91 1154.71 1164.08  
1187.76 1200.22 1202.59 1203.96 1204.25 1204.32  
1205.62 1206.22 1211.35 1213.00 1221.23 1221.26  
1227.51 1228.74 1263.32 1275.08 1294.09 1301.69  
1306.69 1327.80 1329.15 1331.58 1331.77 1363.78  
1364.45 1367.46 1368.25 1374.60 1379.76 1386.12  
1419.22 1443.80 1446.13 1457.94 1466.61 1476.11  
1476.19 1478.42 1479.16 1483.51 1495.23 1497.53  
1509.04 1516.22 1522.02 1524.32 1525.06 1526.81  
1551.75 1552.15 1623.65 1624.39 1625.15 1625.73  
1627.36 1638.65 1640.61 1641.29 1641.56 1641.76  
1642.54 1643.45 1658.25 1665.89 1696.44 3045.19  
3054.24 3113.35 3121.56 3165.93 3166.86 3176.68  
3179.13 3181.19 3181.37 3184.99 3185.64 3186.03  
3189.31 3194.02 3195.14 3195.43 3196.87 3198.66  
3199.37 3203.07 3206.71 3206.90 3207.87 3208.97  
3210.44 3211.77 3212.07 3214.33 3223.95 3230.30  
3235.89 3247.32 3278.09

**Is-TS'''**

-177.16 13.20 17.38 25.58 28.54 30.96  
32.78 36.82 38.66 39.62 43.30 46.07  
48.05 50.78 51.84 54.27 56.88 59.58  
60.78 67.11 68.52 71.83 77.58 79.69  
82.92 84.17 88.52 94.17 100.57 103.24  
111.95 113.16 117.28 126.10 128.15 129.49  
137.73 142.64 145.80 157.54 161.75 163.47  
169.37 174.54 184.57 185.41 188.63 196.46  
205.47 212.09 215.31 219.19 223.79 229.80  
232.87 238.40 241.63 249.81 251.45 261.93  
264.16 265.18 279.81 295.39 300.84 304.66  
312.94 313.48 326.31 332.31 350.89 356.34  
373.85 402.01 410.38 413.00 416.81 419.30  
421.40 423.95 426.12 431.86 436.80 437.64

448.46 452.53 464.34 475.78 480.72 486.36  
510.17 513.27 513.34 515.31 520.63 526.69  
529.89 539.05 552.83 572.27 573.64 577.74  
586.40 596.69 599.30 603.50 605.42 624.42  
626.19 628.07 629.82 632.10 632.66 634.88  
642.55 696.32 698.50 710.64 711.13 711.91  
713.30 715.50 716.91 719.95 721.83 726.05  
735.27 742.97 753.86 759.11 760.33 762.65  
768.27 769.26 769.67 771.15 771.20 791.01  
794.09 808.29 825.40 826.97 828.35 847.47  
863.71 872.91 873.80 876.02 880.03 881.31  
885.57 893.57 894.06 896.07 908.13 939.39  
941.87 945.31 946.41 947.63 953.34 954.10  
962.80 971.74 974.61 978.88 979.35 992.11  
994.69 996.01 998.86 999.04 1012.50 1013.00  
1013.70 1014.76 1017.68 1019.13 1020.24 1025.08  
1030.34 1040.28 1042.89 1047.53 1048.51 1052.23  
1053.51 1053.84 1055.78 1061.84 1063.56 1066.73  
1069.66 1073.25 1075.52 1089.30 1091.93 1094.14  
1100.03 1110.33 1110.88 1112.78 1116.29 1118.96  
1121.30 1123.79 1125.90 1127.25 1134.62 1138.05  
1146.84 1148.37 1156.60 1165.01 1180.67 1186.66  
1193.71 1194.90 1196.44 1198.48 1198.86 1201.05  
1201.62 1210.65 1212.73 1214.11 1222.74 1224.70  
1228.72 1233.16 1235.23 1242.31 1246.01 1266.64  
1274.10 1288.08 1289.02 1296.10 1304.88 1315.90  
1321.43 1323.49 1327.34 1329.44 1330.25 1333.52  
1334.25 1367.52 1367.72 1369.30 1372.49 1375.14  
1375.76 1378.81 1414.67 1426.24 1431.00 1433.82  
1445.04 1447.83 1451.75 1455.02 1466.46 1470.71  
1474.20 1475.90 1478.31 1479.59 1481.24 1483.68  
1489.11 1494.39 1495.10 1495.91 1498.58 1498.66  
1499.88 1502.60 1506.79 1508.09 1514.51 1519.51  
1525.22 1525.84 1526.73 1528.43 1529.91 1532.46  
1553.07 1553.44 1553.84 1610.58 1617.88 1624.46  
1626.41 1628.08 1628.50 1644.03 1645.14 1645.30  
1645.52 1646.46 1647.29 1648.81 1658.35 1660.71  
1669.30 1673.78 1741.89 2963.03 2976.31 3017.12  
3024.89 3025.25 3031.11 3033.34 3033.44 3050.92  
3051.71 3058.77 3090.21 3091.42 3093.87 3117.09  
3117.97 3118.67 3118.84 3134.67 3138.49 3152.60  
3157.96 3160.84 3161.57 3169.62 3169.92 3172.96  
3173.41 3178.66 3182.67 3183.11 3185.38 3188.03  
3190.05 3191.09 3193.51 3196.77 3198.93 3199.66  
3202.36 3203.72 3206.48 3208.02 3210.12 3212.58  
3214.78 3218.69 3222.82 3227.67 3227.88 3292.11

**XIs**

10.82 12.18 23.07 25.91 28.13 35.50  
37.58 39.46 40.95 45.70 47.50 52.63  
55.34 56.35 58.67 67.85 70.17 76.04  
84.27 90.06 96.61 101.01 109.46 111.33  
115.93 119.79 130.04 136.30 141.86 148.45  
153.64 170.04 173.34 180.41 190.85 196.55  
209.62 212.53 217.73 224.86 229.10 233.12  
237.97 251.97 256.39 259.67 260.34 262.50  
306.99 315.12 316.92 331.56 337.15 345.62  
364.88 401.75 406.52 410.91 413.78 418.31  
419.71 430.16 435.37 439.01 440.81 446.90  
459.64 467.00 484.63 490.83 507.04 509.72  
514.83 516.99 525.82 548.73 552.20 572.58  
582.75 595.28 595.70 604.15 620.91 623.20  
625.40 626.96 627.85 630.01 639.18 642.26  
698.60 699.18 705.10 707.59 708.18 711.31  
716.15 718.99 726.36 731.21 734.29 753.01  
756.60 758.72 760.68 762.45 764.57 765.59  
770.13 770.83 771.39 790.02 805.89 831.45  
834.08 843.50 860.27 865.42 866.83 868.73  
874.43 881.39 896.12 912.48 916.85 943.72  
944.28 946.33 946.65 947.84 948.77 952.10  
963.92 965.39 981.51 986.40 987.64 989.80  
993.38 998.57 1012.34 1012.82 1013.19 1014.22  
1017.53 1018.15 1019.24 1019.72 1032.15 1043.34  
1049.26 1050.18 1050.38 1051.94 1052.58 1064.16

1085.32 1087.17 1096.87 1110.97 1114.62 1117.17  
 1117.89 1119.05 1120.85 1123.38 1126.36 1126.63  
 1135.70 1139.27 1141.59 1143.20 1163.51 1165.14  
 1170.59 1185.75 1194.95 1200.20 1202.56 1203.42  
 1203.87 1204.19 1206.08 1206.62 1211.33 1212.87  
 1220.73 1221.67 1227.31 1228.45 1230.04 1246.35  
 1274.83 1281.54 1294.21 1305.40 1306.66 1318.16  
 1328.51 1329.47 1331.38 1331.73 1341.57 1363.66  
 1364.83 1367.94 1368.27 1374.03 1379.83 1385.78  
 1406.44 1443.63 1445.96 1450.04 1466.69 1473.53  
 1475.88 1476.12 1478.36 1478.67 1483.60 1484.78  
 1494.81 1495.53 1500.23 1506.28 1508.18 1515.93  
 1521.80 1524.89 1525.60 1526.82 1540.91 1552.00  
 1552.32 1555.30 1624.54 1624.95 1626.08 1627.17  
 1628.61 1640.20 1640.81 1640.99 1641.88 1642.28  
 1643.62 1644.31 1658.31 1666.77 1679.02 2940.34  
 2966.24 2969.16 3011.22 3019.70 3046.47 3051.14  
 3053.54 3114.87 3119.70 3126.17 3164.14 3170.36  
 3177.40 3180.06 3181.36 3181.81 3183.58 3187.94  
 3188.48 3188.94 3194.26 3194.54 3197.49 3198.79  
 3199.34 3199.63 3201.59 3207.90 3208.15 3209.27  
 3210.85 3211.45 3211.55 3214.35 3214.42 3220.71  
 3231.25 3234.08 3279.91

**I<sub>p</sub>-TS**

-783.19 12.21 16.77 26.84 30.37 33.59  
 38.59 44.64 47.13 51.43 55.90 59.68  
 67.93 77.55 83.62 95.51 96.70 100.51  
 107.22 110.55 119.56 128.26 140.08 149.79  
 155.01 174.26 186.14 195.73 208.80 226.84  
 228.98 232.21 239.45 248.98 259.88 278.72  
 282.17 286.55 287.82 310.18 339.40 356.45  
 373.76 382.29 391.25 415.07 416.45 421.57  
 421.93 426.85 430.23 437.34 481.96 484.72  
 492.00 493.09 497.92 505.32 510.73 529.56  
 536.63 542.39 569.21 604.11 605.42 614.46  
 624.13 627.09 630.90 631.40 632.24 632.88  
 641.04 648.10 676.32 678.96 682.97 695.46  
 707.55 714.37 715.92 717.87 718.58 763.56  
 770.38 776.34 781.75 782.33 784.47 787.44  
 817.51 836.50 844.71 845.80 852.65 856.30  
 858.02 859.33 862.29 866.00 888.90 895.12  
 907.65 916.29 923.07 925.92 927.24 931.22  
 939.09 943.98 962.16 963.16 970.29 971.05  
 975.36 977.94 979.87 996.40 997.65 1001.77  
 1002.39 1004.04 1005.19 1009.11 1012.03 1014.48  
 1015.77 1016.25 1017.53 1019.30 1023.84 1053.58  
 1056.48 1057.59 1058.60 1060.79 1067.83 1069.74  
 1105.77 1108.77 1109.54 1116.61 1117.56 1120.46  
 1135.26 1148.34 1155.68 1157.66 1180.81 1188.12  
 1190.93 1193.73 1195.34 1195.67 1197.70 1197.89  
 1213.79 1215.24 1219.96 1220.97 1224.63 1226.09  
 1227.32 1229.13 1231.56 1231.94 1246.98 1253.13  
 1260.30 1265.66 1277.21 1295.89 1300.85 1310.21  
 1314.09 1321.51 1324.90 1340.11 1345.17 1347.08  
 1356.54 1361.46 1362.32 1367.09 1369.29 1370.61  
 1370.87 1376.76 1392.99 1397.85 1405.52 1443.33  
 1464.71 1477.18 1479.45 1491.79 1492.34 1492.38  
 1493.75 1497.23 1506.07 1506.73 1515.69 1516.26  
 1524.74 1538.37 1541.96 1542.41 1542.71 1543.67  
 1611.32 1633.97 1635.11 1635.61 1639.52 1650.08  
 1657.33 1660.19 1660.74 1662.75 3032.21 3035.04  
 3037.41 3038.28 3041.61 3043.20 3048.80 3050.00  
 3055.62 3079.71 3080.70 3091.55 3094.72 3099.75  
 3101.99 3126.02 3152.11 3158.56 3159.96 3162.99  
 3164.35 3168.92 3169.18 3170.67 3172.78 3175.44  
 3178.35 3178.50 3184.17 3188.02 3186.18 3186.54  
 3191.63 3196.27 3198.56 3198.83 3199.41 3199.73  
 3200.53 3206.78 3207.97 3220.18 3228.36 3231.93

**I<sub>p</sub>-TS'**

-759.86 15.07 16.22 19.97 31.59 39.37  
 44.30 49.08 53.09 55.36 60.47 62.08

77.03 79.52 88.89 92.95 97.87 100.76  
 101.96 110.05 112.04 123.24 139.07 151.66  
 158.07 165.70 188.34 198.81 204.27 225.25  
 229.74 231.69 238.32 256.15 259.47 278.47  
 280.44 287.92 295.58 309.92 332.69 351.85  
 374.25 384.30 396.21 414.13 416.49 420.16  
 422.76 423.68 428.36 437.62 473.26 486.88  
 494.41 499.53 502.76 504.48 509.19 531.86  
 534.27 539.74 562.85 601.25 604.12 616.98  
 625.66 629.38 631.98 632.88 634.35 634.74  
 642.54 649.41 678.57 679.81 688.27 690.14  
 707.91 714.24 716.11 716.75 719.30 759.69  
 763.18 772.81 775.28 775.84 782.91 785.32  
 816.95 837.15 839.58 845.22 851.54 858.14  
 859.00 863.44 864.33 868.00 884.22 896.12  
 910.84 918.65 924.16 924.98 925.49 929.89  
 939.65 946.04 955.43 959.78 972.82 973.55  
 974.22 975.78 976.67 993.15 996.08 1001.01  
 1003.48 1007.66 1011.48 1011.89 1014.74 1016.08  
 1016.42 1017.24 1017.72 1019.30 1025.15 1048.60  
 1058.01 1058.44 1059.98 1061.19 1067.78 1069.35  
 1105.81 1108.25 1109.70 1117.98 1118.86 1120.04  
 1136.06 1149.31 1153.62 1154.23 1181.90 1187.68  
 1189.78 1191.52 1195.27 1195.80 1197.50 1197.92  
 1212.03 1217.44 1220.03 1220.60 1222.65 1225.12  
 1225.48 1228.11 1228.88 1229.22 1246.55 1249.44  
 1255.35 1268.89 1273.91 1299.00 1303.60 1308.94  
 1314.12 1316.23 1323.79 1338.54 1344.05 1345.49  
 1356.96 1358.50 1363.48 1364.87 1366.74 1368.38  
 1368.53 1383.47 1385.97 1394.21 1402.31 1438.00  
 1462.28 1465.17 1477.90 1486.24 1490.56 1494.08  
 1494.43 1496.22 1505.17 1507.75 1514.69 1516.78  
 1522.00 1538.79 1540.30 1540.63 1541.36 1542.05  
 1611.40 1635.08 1635.20 1638.40 1639.25 1649.59  
 1658.92 1659.04 1660.04 1660.37 3025.39 3026.33  
 3039.90 3040.32 3041.75 3044.77 3047.66 3051.20  
 3054.23 3061.45 3084.20 3086.81 3095.65 3098.26  
 3100.57 3113.91 3154.04 3158.83 3160.66 3162.49  
 3165.68 3166.60 3169.50 3170.58 3172.49 3175.18  
 3176.59 3177.99 3182.58 3182.76 3185.09 3186.19  
 3189.63 3191.12 3193.99 3196.41 3196.78 3199.09  
 3201.54 3203.73 3206.39 3220.44 3226.39 3248.53

**II<sub>p</sub>**

2.96 9.73 21.36 23.91 28.18 41.97  
 45.28 48.37 53.67 54.25 57.18 58.69  
 69.25 74.24 81.30 91.74 96.92 101.59  
 105.33 110.99 121.41 137.85 142.38 157.25  
 173.39 178.69 190.46 199.17 215.27 220.72  
 227.58 229.26 238.35 239.72 249.67 273.78  
 278.86 281.47 288.12 306.72 326.83 350.68  
 368.67 382.33 414.59 416.56 419.56 420.40  
 423.47 427.28 436.24 453.44 474.49 480.79  
 490.93 497.19 505.63 512.11 532.27 534.54  
 537.20 569.14 602.72 606.82 615.38 625.19  
 631.26 633.09 633.79 633.97 634.48 643.03  
 648.04 680.25 684.26 692.84 704.20 713.79  
 716.76 717.80 718.29 721.60 759.32 769.20  
 773.46 777.53 782.74 785.06 809.73 837.87  
 846.47 850.53 855.16 858.20 861.48 865.09  
 867.04 870.54 880.36 892.29 908.84 911.23  
 915.27 924.50 927.79 929.57 933.07 940.94  
 944.95 966.30 974.72 975.67 976.46 978.84  
 978.89 992.89 997.63 1000.85 1002.81 1007.34  
 1008.42 1011.83 1012.08 1012.69 1014.85 1016.03  
 1017.42 1017.54 1018.06 1022.30 1055.61 1057.52  
 1058.09 1059.93 1060.66 1062.50 1067.17 1068.35  
 1085.09 1109.82 1112.33 1117.36 1117.46 1129.30  
 1131.61 1146.83 1153.64 1175.52 1186.71 1189.26  
 1193.23 1194.85 1196.26 1196.36 1196.60 1212.50  
 1214.20 1221.74 1222.72 1223.63 1224.86 1225.16  
 1230.97 1232.33 1236.70 1247.15 1255.30 1263.04  
 1268.73 1292.05 1300.31 1306.48 1314.61 1318.65  
 1321.97 1324.09 1343.56 1345.47 1353.58 1360.61

|         |         |         |         |         |         |
|---------|---------|---------|---------|---------|---------|
| 1363.85 | 1364.31 | 1367.76 | 1367.85 | 1368.75 | 1374.11 |
| 1381.72 | 1386.08 | 1399.58 | 1409.45 | 1414.05 | 1463.29 |
| 1476.52 | 1488.85 | 1491.69 | 1492.81 | 1494.87 | 1496.33 |
| 1499.91 | 1503.98 | 1506.21 | 1515.27 | 1515.73 | 1518.35 |
| 1526.15 | 1539.63 | 1540.32 | 1540.96 | 1541.48 | 1607.60 |
| 1635.67 | 1636.49 | 1636.61 | 1638.97 | 1646.49 | 1659.33 |
| 1659.74 | 1660.36 | 1661.72 | 2954.46 | 3030.31 | 3033.89 |
| 3034.21 | 3037.27 | 3038.42 | 3038.96 | 3040.19 | 3044.74 |
| 3045.67 | 3046.06 | 3047.30 | 3057.68 | 3082.81 | 3083.10 |
| 3088.13 | 3091.87 | 3096.07 | 3098.72 | 3107.01 | 3143.16 |
| 3153.80 | 3155.89 | 3163.62 | 3166.52 | 3168.77 | 3171.25 |
| 3171.34 | 3174.07 | 3177.73 | 3181.18 | 3186.38 | 3187.27 |
| 3189.87 | 3190.40 | 3191.36 | 3196.51 | 3197.90 | 3199.31 |
| 3200.79 | 3201.75 | 3203.09 | 3210.87 | 3213.26 | 3215.13 |

**IIp-TS**

|         |         |         |         |         |         |
|---------|---------|---------|---------|---------|---------|
| -317.82 | 13.48   | 18.10   | 22.22   | 29.12   | 29.99   |
| 33.18   | 35.82   | 38.39   | 41.80   | 44.58   | 48.18   |
| 50.42   | 53.16   | 57.12   | 59.15   | 63.90   | 64.39   |
| 71.09   | 76.14   | 79.62   | 81.86   | 90.05   | 97.24   |
| 98.57   | 105.23  | 106.43  | 108.66  | 110.44  | 111.95  |
| 115.15  | 120.04  | 123.76  | 129.98  | 132.72  | 137.91  |
| 141.28  | 150.07  | 157.56  | 170.53  | 181.86  | 187.42  |
| 190.18  | 192.31  | 196.65  | 202.45  | 208.58  | 220.54  |
| 222.03  | 227.45  | 229.61  | 233.00  | 238.79  | 247.80  |
| 268.59  | 269.33  | 276.23  | 278.81  | 287.83  | 288.29  |
| 291.07  | 295.19  | 302.70  | 306.32  | 324.12  | 334.49  |
| 355.50  | 364.80  | 370.85  | 383.87  | 396.42  | 412.31  |
| 418.30  | 419.75  | 422.20  | 425.01  | 431.08  | 434.65  |
| 439.53  | 444.13  | 448.64  | 463.13  | 475.90  | 482.73  |
| 499.03  | 500.05  | 503.32  | 506.05  | 523.99  | 532.59  |
| 532.82  | 534.01  | 543.14  | 551.28  | 560.85  | 568.59  |
| 575.06  | 591.21  | 599.41  | 602.35  | 606.77  | 607.97  |
| 617.79  | 625.16  | 630.15  | 632.36  | 633.47  | 633.57  |
| 634.61  | 643.03  | 644.38  | 648.41  | 673.39  | 681.72  |
| 683.46  | 696.00  | 713.20  | 716.34  | 717.89  | 719.15  |
| 723.14  | 739.88  | 742.77  | 761.90  | 768.06  | 770.17  |
| 770.60  | 777.49  | 778.43  | 782.80  | 783.29  | 785.10  |
| 794.35  | 816.00  | 829.94  | 836.39  | 846.21  | 852.75  |
| 854.43  | 856.31  | 861.27  | 863.73  | 864.80  | 867.95  |
| 875.19  | 875.73  | 876.71  | 892.57  | 897.23  | 899.25  |
| 901.71  | 905.35  | 911.09  | 915.28  | 919.55  | 927.68  |
| 928.79  | 930.84  | 932.00  | 936.43  | 943.54  | 945.01  |
| 955.34  | 966.63  | 970.33  | 973.83  | 975.69  | 978.77  |
| 979.32  | 984.16  | 987.54  | 995.62  | 998.22  | 1002.82 |
| 1007.99 | 1008.63 | 1011.32 | 1013.70 | 1014.53 | 1014.86 |
| 1015.32 | 1015.76 | 1017.68 | 1019.98 | 1021.81 | 1025.01 |
| 1039.91 | 1042.01 | 1043.34 | 1044.25 | 1056.32 | 1056.65 |
| 1057.35 | 1060.49 | 1060.97 | 1062.63 | 1064.14 | 1064.89 |
| 1065.82 | 1067.12 | 1069.25 | 1069.36 | 1078.73 | 1093.23 |
| 1105.85 | 1110.24 | 1110.62 | 1115.53 | 1120.82 | 1134.69 |
| 1138.37 | 1140.27 | 1150.79 | 1155.48 | 1184.55 | 1186.28 |
| 1187.02 | 1191.54 | 1194.03 | 1194.72 | 1195.31 | 1196.95 |
| 1198.02 | 1198.66 | 1201.47 | 1216.45 | 1217.42 | 1221.09 |
| 1222.54 | 1223.18 | 1223.76 | 1225.69 | 1226.53 | 1232.93 |
| 1240.23 | 1240.92 | 1247.34 | 1253.46 | 1259.83 | 1264.80 |
| 1270.50 | 1289.55 | 1298.97 | 1301.16 | 1305.92 | 1310.11 |
| 1313.18 | 1315.67 | 1317.75 | 1323.81 | 1329.49 | 1330.25 |
| 1341.75 | 1343.01 | 1355.68 | 1355.81 | 1356.94 | 1364.65 |
| 1364.85 | 1365.69 | 1366.20 | 1367.76 | 1376.43 | 1381.25 |
| 1388.79 | 1396.81 | 1401.39 | 1406.62 | 1413.86 | 1424.28 |
| 1425.28 | 1428.58 | 1453.03 | 1464.86 | 1472.82 | 1478.82 |
| 1480.57 | 1489.65 | 1490.28 | 1493.34 | 1494.74 | 1495.17 |
| 1495.91 | 1498.11 | 1503.03 | 1503.91 | 1504.28 | 1505.76 |
| 1507.39 | 1508.34 | 1511.14 | 1515.22 | 1515.98 | 1517.68 |
| 1526.96 | 1529.51 | 1539.58 | 1539.93 | 1540.56 | 1542.11 |
| 1572.70 | 1613.09 | 1616.16 | 1630.43 | 1634.71 | 1635.47 |
| 1636.44 | 1644.01 | 1645.70 | 1650.93 | 1656.53 | 1656.92 |
| 1657.77 | 1658.42 | 1660.10 | 1773.21 | 2972.75 | 3022.85 |
| 3024.52 | 3027.27 | 3030.40 | 3031.90 | 3036.43 | 3040.05 |
| 3041.24 | 3042.36 | 3045.29 | 3051.43 | 3056.20 | 3076.33 |
| 3080.00 | 3081.38 | 3088.79 | 3090.05 | 3093.61 | 3095.23 |
| 3099.15 | 3099.95 | 3101.57 | 3101.70 | 3106.28 | 3116.35 |
| 3123.60 | 3126.42 | 3131.69 | 3143.26 | 3150.08 | 3154.65 |

|         |         |         |         |         |         |
|---------|---------|---------|---------|---------|---------|
| 3161.06 | 3161.32 | 3162.88 | 3166.28 | 3172.21 | 3172.92 |
| 3175.67 | 3176.48 | 3176.84 | 3180.71 | 3181.03 | 3181.25 |
| 3183.60 | 3188.62 | 3192.11 | 3192.72 | 3193.10 | 3195.57 |
| 3197.94 | 3199.88 | 3200.47 | 3202.37 | 3205.77 | 3211.86 |
| 3218.65 | 3220.90 | 3241.68 | 3247.37 | 3247.52 | 3307.82 |

**III<sub>PN</sub>**

|         |         |         |         |         |         |
|---------|---------|---------|---------|---------|---------|
| 5.47    | 16.55   | 17.80   | 26.17   | 27.39   | 33.33   |
| 37.36   | 43.73   | 47.85   | 53.53   | 57.76   | 63.84   |
| 66.10   | 68.97   | 70.88   | 80.12   | 88.62   | 91.00   |
| 93.48   | 96.36   | 101.35  | 106.01  | 115.34  | 118.81  |
| 122.87  | 142.15  | 148.48  | 159.21  | 163.21  | 172.89  |
| 181.80  | 189.28  | 192.94  | 196.92  | 221.22  | 223.68  |
| 225.68  | 229.06  | 243.74  | 246.24  | 253.78  | 259.61  |
| 265.84  | 280.72  | 283.13  | 290.46  | 304.04  | 313.75  |
| 330.71  | 337.97  | 356.70  | 373.06  | 391.22  | 408.75  |
| 417.83  | 419.35  | 420.86  | 422.01  | 432.57  | 434.64  |
| 440.59  | 444.74  | 474.65  | 486.05  | 488.93  | 499.96  |
| 506.90  | 513.81  | 514.72  | 519.29  | 533.28  | 560.42  |
| 561.87  | 584.32  | 603.95  | 607.14  | 613.40  | 617.54  |
| 621.73  | 624.94  | 630.40  | 631.34  | 632.67  | 634.03  |
| 635.98  | 642.85  | 647.64  | 661.23  | 676.92  | 689.49  |
| 691.72  | 693.06  | 717.72  | 718.55  | 719.43  | 721.22  |
| 734.97  | 756.20  | 777.35  | 778.59  | 779.84  | 781.99  |
| 783.35  | 784.86  | 785.46  | 794.05  | 814.19  | 840.03  |
| 845.89  | 851.02  | 851.34  | 856.09  | 860.19  | 862.87  |
| 865.29  | 866.93  | 867.65  | 869.13  | 893.61  | 893.89  |
| 918.00  | 919.23  | 925.56  | 928.81  | 931.34  | 932.67  |
| 934.59  | 935.11  | 946.12  | 946.93  | 951.40  | 956.05  |
| 973.78  | 975.31  | 983.30  | 983.99  | 985.50  | 985.56  |
| 1000.80 | 1003.33 | 1006.05 | 1009.90 | 1010.73 | 1011.67 |
| 1013.97 | 1015.59 | 1015.77 | 1016.43 | 1016.88 | 1017.88 |
| 1019.32 | 1020.21 | 1020.90 | 1024.63 | 1040.06 | 1041.93 |
| 1056.97 | 1057.69 | 1057.99 | 1059.23 | 1060.97 | 1066.94 |
| 1068.51 | 1095.68 | 1100.32 | 1109.10 | 1110.84 | 1119.77 |
| 1125.13 | 1136.51 | 1140.16 | 1151.33 | 1155.26 | 1157.56 |
| 1171.12 | 1181.21 | 1182.43 | 1192.34 | 1197.75 | 1198.33 |
| 1199.52 | 1199.80 | 1200.50 | 1202.41 | 1218.59 | 1221.73 |
| 1222.42 | 1222.42 | 1223.03 | 1223.69 | 1227.18 | 1230.53 |
| 1231.81 | 1233.69 | 1252.75 | 1257.52 | 1260.28 | 1264.03 |
| 1270.22 | 1299.45 | 1300.23 | 1305.13 | 1309.54 | 1316.55 |
| 1318.48 | 1322.55 | 1328.50 | 1343.64 | 1348.14 | 1355.80 |
| 1358.66 | 1360.81 | 1365.09 | 1365.29 | 1366.18 | 1367.55 |
| 1379.30 | 1382.03 | 1385.00 | 1391.95 | 1395.26 | 1401.47 |
| 1403.99 | 1411.14 | 1430.02 | 1463.19 | 1476.42 | 1477.25 |
| 1480.24 | 1492.41 | 1493.29 | 1495.44 | 1496.62 | 1500.05 |
| 1504.55 | 1505.75 | 1506.97 | 1511.03 | 1514.54 | 1515.30 |
| 1524.94 | 1536.60 | 1539.11 | 1539.40 | 1540.22 | 1540.68 |
| 1611.57 | 1613.84 | 1635.33 | 1636.94 | 1638.31 | 1639.12 |
| 1642.75 | 1649.85 | 1657.05 | 1658.95 | 1659.64 | 1659.76 |
| 3018.18 | 3023.63 | 3032.61 | 3043.20 | 3046.23 | 3046.75 |
| 3050.28 | 3053.99 | 3055.55 | 3059.38 | 3086.81 | 3096.02 |
| 3097.49 | 3101.32 | 3102.79 | 3109.63 | 3110.52 | 3113.01 |
| 3165.49 | 3168.03 | 3175.23 | 3176.15 | 3177.80 | 3178.48 |
| 3179.79 | 3183.26 | 3184.74 | 3185.58 | 3186.12 | 3186.49 |
| 3188.91 | 3192.66 | 3196.90 | 3197.18 | 3198.84 | 3199.45 |
| 3200.42 | 3200.65 | 3206.55 | 3206.98 | 3207.10 | 3207.93 |
| 3210.92 | 3211.24 | 3211.31 | 3213.75 | 3217.54 | 3218.80 |
| 3223.57 | 3238.94 | 3258.36 |         |         |         |

**III<sub>PN-TS</sub>**

|         |        |        |        |        |        |
|---------|--------|--------|--------|--------|--------|
| -200.00 | 19.03  | 23.13  | 24.88  | 28.66  | 32.05  |
| 35.70   | 42.79  | 44.73  | 51.36  | 58.99  | 61.45  |
| 66.70   | 71.11  | 72.58  | 81.17  | 88.12  | 91.74  |
| 93.42   | 101.31 | 104.99 | 110.28 | 116.90 | 122.85 |
| 127.11  | 133.39 | 137.71 | 151.91 | 153.93 | 155.12 |
| 169.22  | 197.05 | 208.38 | 216.94 | 221.05 | 228.87 |
| 236.60  | 240.14 | 244.60 | 247.36 | 248.28 | 262.07 |
| 267.15  | 274.91 | 282.84 | 284.63 | 296.02 | 313.86 |
| 324.39  | 341.39 | 343.50 | 367.75 | 374.31 | 419.90 |
| 420.29  | 426.42 | 426.71 | 428.07 | 429.55 | 431.38 |
| 453.41  | 464.70 | 483.75 | 494.16 | 499.61 | 512.29 |
| 518.37  | 523.02 | 530.45 | 543.37 | 550.77 | 556.72 |



558.23 587.53 590.65 599.09 616.12 616.55  
625.84 628.15 629.14 630.91 631.76 632.62  
636.70 641.71 653.23 669.95 678.34 695.44  
709.24 721.03 721.98 722.72 726.26 742.38  
758.60 767.57 772.25 775.08 776.87 780.36  
781.44 783.11 786.97 789.60 809.61 812.49  
827.73 844.80 851.49 862.92 865.63 866.16  
871.65 875.29 883.16 887.91 894.54 898.05  
905.30 913.53 917.64 921.19 932.92 934.97  
937.05 937.98 947.87 949.14 952.27 965.36  
981.81 983.08 986.29 986.66 987.85 992.52  
998.17 1003.49 1004.14 1005.86 1007.17 1009.16  
1010.60 1014.52 1014.71 1016.20 1016.33 1021.09  
1022.04 1031.66 1033.29 1044.24 1045.50 1047.70  
1054.43 1057.53 1058.27 1060.28 1061.87 1064.85  
1066.20 1090.85 1104.24 1109.03 1117.96 1118.99  
1121.72 1135.52 1142.64 1152.40 1153.83 1160.08  
1162.01 1180.65 1189.64 1192.87 1197.46 1199.14  
1199.59 1199.88 1205.62 1208.14 1210.19 1215.71  
1218.80 1221.26 1221.90 1222.14 1223.17 1225.66  
1227.42 1227.56 1232.80 1247.38 1262.12 1265.87  
1271.55 1276.05 1294.10 1301.63 1307.89 1309.72  
1311.67 1321.48 1334.91 1341.60 1344.08 1346.10  
1360.18 1360.89 1361.43 1365.17 1366.51 1367.89  
1368.54 1373.84 1381.38 1389.08 1389.61 1395.28  
1405.29 1408.60 1426.97 1471.95 1475.33 1478.94  
1479.58 1490.78 1492.97 1494.73 1494.82 1495.34  
1504.77 1508.14 1509.13 1509.41 1517.88 1524.29  
1529.84 1537.70 1538.35 1539.11 1541.30 1545.15  
1612.36 1625.61 1629.57 1633.78 1635.71 1636.43  
1640.06 1648.10 1653.68 1655.61 1658.46 1659.99  
2998.21 3010.90 3045.57 3046.29 3052.47 3053.94  
3058.72 3061.87 3065.42 3073.55 3080.46 3088.48  
3099.11 3100.02 3112.18 3112.38 3121.13 3124.26  
3149.54 3160.21 3163.76 3169.01 3169.63 3172.32  
3174.09 3174.85 3176.42 3180.94 3182.09 3182.20  
3186.03 3186.19 3189.72 3191.73 3196.94 3198.14  
3199.18 3201.34 3202.50 3205.95 3206.38 3208.76  
3211.67 3215.59 3216.94 3218.07 3221.28 3223.15  
3226.67 3245.32 3314.92

V<sub>PN</sub>

5.86 9.63 19.92 24.30 26.94 29.70  
35.38 38.40 45.01 46.67 52.56 55.64  
58.16 67.93 71.78 73.30 81.24 82.08  
95.63 96.83 111.25 112.70 114.37 121.41  
131.76 140.50 142.90 160.18 162.97 178.83  
192.31 204.03 211.36 213.26 219.21 227.77  
235.97 243.57 249.42 259.33 263.25 268.24  
270.08 281.63 297.08 304.61 321.04 345.12  
347.04 368.25 374.90 390.76 405.05 412.40  
418.75 420.77 421.51 424.05 431.16 436.50  
475.86 478.24 489.19 494.41 497.80 513.93  
515.10 519.89 534.93 537.47 569.82 577.75  
587.79 602.35 604.80 613.53 615.72 623.24  
630.35 631.66 633.71 634.38 634.71 639.65  
647.09 675.87 678.10 679.40 684.96 688.08  
707.87 717.06 719.21 720.26 720.65 721.95  
740.05 770.02 778.09 779.72 781.29 783.89  
784.24 787.14 788.61 795.16 817.68 837.86  
841.81 850.24 852.64 859.56 862.74 865.60  
867.38 871.06 875.23 891.51 892.52 895.75  
912.25 924.48 926.26 927.60 932.90 935.14  
935.46 939.77 945.88 952.50 975.36 978.61  
980.50 981.06 983.56 984.46 992.62 1002.92  
1006.75 1008.20 1008.86 1009.26 1010.01 1011.42  
1012.66 1013.79 1014.12 1015.08 1016.40 1017.89  
1019.45 1021.62 1022.60 1046.43 1053.63 1055.89  
1057.72 1059.54 1061.90 1066.37 1066.94 1068.07  
1105.94 1108.43 1109.97 1116.31 1119.62 1123.75  
1137.73 1139.21 1153.29 1156.67 1158.49 1169.78  
1180.02 1186.81 1195.30 1197.45 1198.39 1198.59  
1199.69 1200.40 1204.10 1211.52 1220.06 1221.74  
1222.62 1223.03 1223.93 1224.23 1225.77 1228.27

1229.65 1234.71 1245.99 1252.78 1262.47 1266.73  
1293.65 1300.01 1302.96 1308.07 1310.92 1312.32  
1318.45 1324.65 1332.09 1345.68 1346.00 1351.89  
1361.97 1363.37 1363.84 1366.45 1366.73 1366.94  
1373.39 1385.86 1387.19 1387.57 1394.10 1397.81  
1400.00 1419.28 1431.89 1466.22 1477.65 1487.00  
1487.49 1492.29 1494.01 1495.82 1497.60 1504.35  
1505.93 1509.88 1510.53 1515.69 1516.36 1517.00  
1539.15 1539.56 1540.31 1540.61 1542.05 1580.64  
1634.51 1634.58 1635.01 1636.14 1636.33 1642.14  
1656.46 1657.19 1658.47 1658.85 1660.65 1661.83  
3027.22 3033.48 3041.24 3048.14 3049.13 3049.92  
3053.35 3055.98 3056.33 3057.97 3061.02 3096.07  
3096.40 3099.10 3105.27 3107.82 3111.31 3117.43  
3133.22 3149.17 3150.66 3165.22 3168.47 3177.58  
3179.62 3182.13 3183.49 3184.50 3184.92 3185.69  
3186.69 3187.63 3188.24 3193.65 3193.96 3195.31  
3195.85 3198.15 3199.32 3202.06 3204.20 3205.50  
3206.03 3207.25 3210.39 3212.27 3212.65 3213.26  
3214.51 3270.12 3289.45

VI<sub>PN</sub>

2.35 7.51 16.87 18.14 20.97 26.37  
28.05 34.09 36.74 38.43 40.58 42.55  
49.04 50.36 54.20 55.66 58.75 60.05  
62.09 63.12 69.84 76.27 81.68 87.18  
92.31 95.83 102.60 109.58 111.81 115.26  
118.66 121.12 127.19 128.78 138.28 143.67  
150.57 160.11 167.33 176.38 183.56 187.37  
204.16 212.39 214.22 218.63 221.07 226.15  
238.41 239.17 247.04 253.64 254.58 259.92  
266.64 270.37 270.76 289.97 298.64 309.58  
314.04 319.03 320.19 336.20 343.10 343.40  
351.11 387.69 393.37 397.28 413.81 415.25  
416.65 421.86 421.94 426.68 433.90 444.10  
460.12 468.75 479.02 484.95 491.69 493.74  
500.31 505.88 510.03 515.03 518.15 525.14  
530.09 541.10 549.84 577.86 582.12 598.41  
599.45 604.55 609.77 610.85 617.50 620.96  
624.61 633.06 633.31 634.20 635.23 635.99  
637.49 646.13 648.03 660.22 671.70 674.25  
679.02 703.91 710.19 714.02 714.94 720.58  
722.08 726.54 735.33 760.07 776.80 778.64  
779.20 782.25 782.99 783.46 789.49 813.13  
817.06 818.20 823.32 839.59 843.11 848.06  
854.47 855.39 856.89 859.43 864.50 867.02  
870.66 872.15 872.86 883.39 890.84 902.81  
919.12 923.50 924.02 930.96 933.86 935.11  
935.75 938.35 942.29 950.02 959.76 966.04  
972.12 975.10 976.66 979.05 980.42 983.49  
983.85 995.31 996.15 998.17 1003.39 1004.76  
1008.32 1013.51 1015.22 1015.64 1016.71 1018.07  
1018.50 1020.30 1023.43 1030.07 1038.93 1043.48  
1044.50 1052.85 1058.33 1060.15 1060.98 1062.67  
1063.20 1064.58 1065.13 1068.96 1069.70 1072.02  
1074.57 1084.39 1107.98 1109.05 1112.41 1117.81  
1121.27 1123.81 1127.18 1129.35 1141.00 1149.98  
1155.49 1162.57 1175.26 1183.00 1193.91 1195.52  
1195.79 1197.21 1198.34 1199.43 1202.00 1217.34  
1219.47 1219.71 1221.08 1221.96 1224.93 1227.79  
1228.56 1229.48 1234.72 1235.11 1236.67 1247.38  
1253.53 1254.87 1256.15 1268.34 1283.80 1289.98  
1309.66 1314.03 1314.19 1314.84 1317.17 1323.30  
1328.76 1331.13 1336.74 1339.71 1345.16 1345.89  
1358.35 1360.44 1365.20 1367.23 1367.82 1369.18  
1370.34 1373.97 1380.33 1395.14 1397.02 1398.89  
1401.34 1404.87 1423.69 1424.07 1424.87 1426.05  
1428.98 1432.19 1450.88 1464.32 1472.12 1475.83  
1488.14 1490.70 1491.81 1491.97 1494.27 1495.33  
1495.80 1498.13 1498.42 1505.85 1505.88 1507.04  
1509.04 1513.77 1514.78 1515.38 1517.57 1523.19  
1526.12 1539.23 1540.39 1541.42 1542.81 1545.52  
1559.40 1613.86 1623.00 1635.04 1635.10 1637.29  
1640.73 1641.22 1651.11 1658.10 1660.09 1661.23

1661.73 1661.90 1662.62 1665.00 3009.50 3025.57  
 3030.16 3038.20 3038.53 3041.16 3044.04 3044.89  
 3045.17 3047.41 3047.89 3048.26 3051.83 3054.99  
 3067.77 3079.07 3082.65 3088.58 3094.57 3096.53  
 3099.82 3105.46 3107.79 3111.64 3120.31 3126.08  
 3139.25 3140.88 3149.36 3153.43 3162.68 3166.44  
 3169.09 3170.35 3171.96 3173.19 3174.13 3174.50  
 3174.94 3175.30 3178.19 3184.13 3185.33 3188.66  
 3189.32 3190.59 3193.27 3194.47 3195.22 3199.61  
 3199.91 3201.02 3201.99 3202.74 3206.72 3209.18  
 3209.90 3210.41 3218.90 3221.86 3249.20 3321.25

**II<sub>p</sub>-TS'**

-184.18 10.00 15.79 19.17 21.32 24.45  
 27.34 33.24 34.34 38.29 41.89 45.96  
 47.17 51.19 53.24 54.83 59.09 63.22  
 67.06 75.10 77.39 79.89 82.58 84.14  
 89.47 91.19 101.92 105.32 105.98 109.69  
 112.46 119.30 121.71 128.47 133.39 139.07  
 146.70 152.46 163.36 164.38 173.46 184.89  
 191.10 192.40 197.13 208.38 218.70 220.43  
 222.45 223.62 227.34 233.50 236.69 238.46  
 249.36 255.62 264.48 276.69 277.82 280.34  
 284.67 289.46 300.72 306.70 321.40 328.33  
 360.32 362.63 369.51 392.49 413.81 414.64  
 417.48 419.97 422.45 425.10 432.42 436.93  
 440.63 448.18 457.00 467.25 477.47 490.03  
 490.60 500.58 501.00 510.39 515.93 520.49  
 531.51 539.18 545.89 554.29 562.61 571.32  
 577.52 595.57 602.93 603.07 608.89 610.17  
 611.70 623.05 629.66 630.27 630.96 631.47  
 631.89 636.83 638.64 648.06 657.21 668.82  
 678.39 698.29 712.41 715.44 717.32 718.23  
 720.27 740.37 744.04 765.24 769.95 773.60  
 775.90 780.94 781.44 782.60 782.69 783.70  
 786.98 818.95 827.02 837.95 841.15 851.15  
 853.18 854.65 861.28 863.38 863.88 867.91  
 871.61 873.34 875.80 893.48 894.63 897.74  
 900.64 906.34 914.96 921.15 922.78 923.46  
 926.80 931.93 938.60 943.69 944.80 959.39  
 961.15 972.62 972.80 975.93 977.48 978.85  
 981.95 993.26 995.18 1000.02 1001.72 1008.01  
 1011.20 1012.22 1013.03 1014.73 1016.39 1017.70  
 1018.42 1019.35 1021.38 1023.16 1023.78 1029.98  
 1039.92 1040.80 1048.40 1055.26 1055.59 1057.64  
 1058.85 1061.80 1062.14 1064.47 1065.40 1068.45  
 1069.50 1069.88 1073.31 1077.30 1087.07 1107.50  
 1110.57 1112.10 1116.34 1120.49 1123.56 1135.85  
 1140.33 1142.82 1149.59 1157.10 1186.03 1189.50  
 1193.56 1194.62 1195.70 1196.31 1196.52 1197.52  
 1198.36 1199.42 1207.89 1217.55 1220.16 1221.74  
 1224.15 1225.13 1226.03 1227.56 1230.73 1231.46  
 1239.62 1241.47 1248.54 1251.52 1255.92 1256.94  
 1281.39 1287.46 1303.14 1303.93 1307.81 1309.90  
 1312.10 1318.80 1322.37 1330.23 1332.90 1344.80  
 1345.25 1346.36 1355.06 1358.42 1362.36 1365.05  
 1365.93 1367.19 1367.93 1369.17 1371.12 1392.36  
 1398.28 1400.14 1404.66 1417.16 1418.51 1426.55  
 1427.90 1432.23 1451.96 1453.72 1468.16 1468.38  
 1477.80 1490.19 1491.23 1491.98 1492.70 1493.28  
 1494.62 1495.85 1498.17 1498.84 1503.78 1507.79  
 1508.09 1512.00 1513.23 1514.66 1517.10 1517.27  
 1518.66 1526.34 1529.69 1538.17 1538.96 1539.29  
 1540.63 1608.07 1619.32 1631.70 1634.21 1634.48  
 1636.43 1641.41 1647.43 1651.91 1655.44 1656.79  
 1657.81 1660.79 1662.44 1759.21 2970.80 3026.07  
 3031.25 3034.13 3035.57 3036.86 3037.64 3038.53  
 3039.57 3046.80 3048.12 3052.04 3052.61 3064.02  
 3078.58 3080.83 3081.37 3086.57 3090.07 3094.78  
 3101.03 3104.10 3104.27 3111.35 3118.23 3126.72  
 3133.16 3138.81 3140.87 3150.90 3151.56 3156.73  
 3157.40 3164.43 3165.45 3170.15 3171.07 3173.27  
 3177.99 3178.62 3180.04 3180.23 3180.89 3186.50  
 3188.73 3189.41 3190.31 3191.04 3194.40 3195.88

3197.94 3199.36 3200.14 3202.81 3204.48 3206.12  
 3213.42 3218.80 3229.89 3244.30 3261.96 3291.34

**III<sub>PC</sub>**

17.45 21.79 24.40 27.20 33.16 36.16  
 40.94 45.93 51.74 60.36 64.27 69.22  
 71.29 76.17 83.59 87.21 91.44 93.71  
 96.54 108.29 108.67 116.75 120.62 123.44  
 124.69 131.86 142.05 150.71 161.13 174.15  
 182.44 188.09 196.04 203.91 211.26 217.47  
 222.24 231.16 235.14 243.93 262.04 266.15  
 269.71 279.61 291.80 303.04 313.61 314.90  
 334.87 342.39 368.15 378.74 393.72 406.83  
 412.87 415.80 418.99 421.70 428.85 432.33  
 437.63 445.15 472.43 493.26 496.88 502.79  
 506.08 513.37 518.36 519.02 536.53 552.94  
 571.86 582.43 596.78 608.89 614.67 616.40  
 622.84 626.26 630.30 632.82 634.19 634.98  
 639.30 641.59 648.10 663.33 681.16 686.92  
 694.26 701.34 717.36 717.88 719.09 723.92  
 766.31 774.24 776.18 777.85 780.51 781.75  
 783.59 787.35 793.21 797.38 818.86 837.42  
 845.08 848.69 854.33 860.46 861.62 862.12  
 865.55 871.79 873.70 885.18 893.20 904.35  
 912.15 919.77 924.09 927.38 932.95 934.32  
 938.50 942.77 943.16 946.67 949.85 957.23  
 976.52 980.88 982.07 989.23 992.95 993.52  
 999.73 1000.67 1002.51 1006.92 1008.71 1009.88  
 1012.33 1012.84 1014.41 1015.04 1016.57 1017.76  
 1018.91 1019.06 1019.50 1021.68 1027.36 1034.65  
 1040.03 1056.10 1056.96 1057.74 1059.82 1060.54  
 1065.21 1068.79 1104.71 1109.92 1111.56 1119.41  
 1120.51 1126.55 1138.75 1152.90 1156.36 1158.41  
 1183.25 1184.97 1187.75 1193.83 1197.28 1198.45  
 1198.55 1199.79 1200.14 1202.60 1217.03 1219.37  
 1222.57 1222.81 1224.27 1224.78 1225.78 1226.39  
 1228.56 1230.49 1249.24 1252.73 1255.25 1256.08  
 1258.75 1261.74 1294.78 1302.14 1310.89 1311.14  
 1321.53 1331.88 1335.09 1342.80 1343.42 1345.27  
 1346.64 1357.80 1361.48 1363.71 1365.85 1366.75  
 1367.81 1374.27 1381.77 1388.85 1390.23 1395.36  
 1396.36 1400.94 1415.48 1466.88 1474.54 1477.06  
 1478.60 1487.08 1491.97 1493.77 1493.93 1495.74  
 1502.95 1507.11 1507.47 1508.71 1515.94 1517.00  
 1523.64 1531.14 1539.08 1540.67 1540.94 1541.40  
 1611.84 1623.87 1634.22 1637.85 1638.07 1638.76  
 1641.78 1648.94 1657.43 1659.88 1660.11 1660.50  
 3011.43 3020.10 3030.57 3046.51 3049.81 3051.47  
 3056.96 3063.37 3066.54 3068.83 3072.04 3100.71  
 3101.25 3101.92 3106.12 3107.57 3117.39 3124.29  
 3148.58 3163.24 3167.19 3178.89 3179.15 3183.45  
 3184.13 3184.44 3185.11 3187.45 3191.38 3193.35  
 3193.80 3194.40 3195.93 3198.84 3200.31 3201.11  
 3203.81 3204.81 3205.88 3207.98 3208.36 3209.51  
 3211.59 3212.33 3213.46 3215.50 3224.06 3228.96  
 3243.56 3246.84 3247.37

**III<sub>PC</sub>-TS**

-143.21 13.96 17.38 21.40 24.42 32.36  
 37.81 43.98 45.39 48.98 52.46 67.50  
 68.91 72.11 74.63 78.71 81.24 85.82  
 94.53 99.01 101.92 110.88 114.10 120.96  
 121.46 126.90 133.52 137.09 159.82 162.58  
 165.38 185.53 194.12 197.01 212.28 215.22  
 227.25 233.83 241.75 251.30 262.54 266.43  
 269.19 276.85 282.79 294.29 298.02 315.40  
 338.68 343.39 368.36 374.96 393.18 412.22  
 414.47 414.95 417.89 424.66 425.81 429.47  
 438.08 450.13 464.31 491.75 496.19 503.79  
 509.63 512.74 515.33 522.10 541.11 544.60  
 559.83 585.03 591.36 607.36 615.00 616.15  
 622.52 625.53 629.84 631.35 632.16 633.87  
 635.50 640.30 647.52 671.99 677.43 683.82

691.27 702.61 716.07 716.71 724.75 725.35  
763.59 772.12 775.75 776.68 780.81 783.46  
784.37 786.56 787.96 818.28 828.91 837.12  
844.32 848.25 855.01 859.08 860.79 862.13  
868.55 871.47 873.31 887.84 892.82 903.48  
909.02 917.10 925.22 929.51 936.89 937.47  
941.77 946.30 946.89 949.98 961.10 971.83  
976.44 979.46 985.47 987.42 992.67 997.96  
1000.25 1000.34 1005.51 1005.96 1008.46 1010.22  
1010.95 1012.01 1013.62 1015.50 1016.57 1017.14  
1019.43 1020.31 1021.49 1025.40 1033.11 1042.50  
1055.45 1055.66 1057.16 1058.38 1060.10 1062.48  
1066.70 1068.17 1109.71 1111.02 1112.21 1119.83  
1120.52 1126.42 1141.19 1152.73 1154.46 1159.47  
1184.91 1189.45 1192.67 1194.91 1198.18 1198.96  
1199.55 1199.87 1202.84 1203.99 1218.02 1220.35  
1221.24 1222.69 1223.80 1224.28 1227.05 1229.76  
1230.57 1232.00 1241.02 1249.86 1251.07 1254.71  
1257.88 1267.38 1292.58 1304.83 1310.55 1311.10  
1321.60 1328.61 1333.04 1335.52 1345.07 1345.62  
1350.22 1355.83 1362.24 1363.46 1365.68 1366.16  
1367.83 1371.47 1379.78 1384.11 1385.70 1394.13  
1396.90 1397.07 1420.89 1465.78 1478.54 1481.66  
1485.20 1487.63 1490.52 1493.43 1494.57 1495.77  
1499.53 1507.43 1508.55 1509.40 1517.18 1518.34  
1526.63 1538.54 1540.15 1540.42 1540.88 1548.30  
1614.45 1633.94 1636.34 1636.73 1636.92 1637.17  
1642.67 1657.14 1658.27 1659.00 1659.64 1660.11  
3022.02 3025.23 3030.64 3038.71 3049.02 3052.82  
3057.05 3057.37 3068.74 3070.54 3073.40 3099.11  
3101.81 3106.87 3107.66 3119.29 3121.31 3130.02  
3136.46 3171.08 3172.23 3178.55 3178.73 3179.17  
3183.56 3184.27 3185.18 3187.78 3189.85 3192.14  
3192.42 3195.13 3196.11 3198.31 3200.86 3201.86  
3204.05 3206.12 3206.28 3209.47 3209.88 3211.37  
3212.45 3215.49 3215.92 3221.84 3223.71 3225.20  
3230.37 3231.14 3232.12

V<sub>PC</sub>

6.38 12.52 17.46 19.40 23.69 29.78  
32.20 39.52 45.94 48.51 53.15 55.46  
61.34 64.27 64.86 76.09 80.50 84.76  
86.84 94.87 103.28 114.95 119.05 124.05  
132.39 133.74 150.70 153.76 158.39 166.72  
189.24 204.98 217.34 228.29 229.49 231.32  
236.67 242.68 243.90 246.30 248.55 269.27  
284.39 289.50 294.31 313.54 317.15 334.47  
335.36 354.50 380.40 384.45 414.55 415.32  
420.36 420.49 423.49 431.10 435.54 441.64  
480.27 483.91 489.14 499.89 508.10 514.08  
517.35 519.77 531.78 534.78 553.84 567.96  
595.02 595.97 600.70 608.42 615.92 625.48  
631.20 632.60 633.59 634.25 635.14 641.07  
648.67 654.77 678.73 680.34 688.42 689.71  
717.22 717.36 719.26 722.79 724.05 750.23  
770.38 774.00 776.38 779.42 782.38 784.75  
788.66 795.80 818.89 831.45 835.14 843.70  
850.57 854.14 859.06 860.29 863.18 867.16  
868.40 892.35 894.96 896.44 906.45 906.91  
919.95 922.49 927.07 930.27 931.52 933.74  
939.74 941.67 963.68 971.11 973.30 975.42  
981.46 981.67 983.16 1001.99 1002.94 1004.04  
1004.64 1005.13 1005.48 1007.00 1007.92 1010.32  
1013.51 1014.16 1015.70 1016.26 1017.33 1017.96  
1018.96 1021.83 1041.68 1053.82 1057.99 1059.50  
1060.52 1060.67 1066.19 1067.98 1070.09 1085.30  
1095.85 1109.93 1110.56 1121.47 1122.85 1126.03  
1129.15 1136.43 1152.50 1158.18 1183.43 1184.67  
1190.86 1196.18 1196.87 1198.42 1199.42 1199.91  
1200.59 1202.26 1211.14 1219.54 1220.09 1221.88  
1222.18 1222.65 1223.21 1225.30 1226.05 1226.77  
1228.00 1242.13 1248.86 1250.17 1252.05 1255.20  
1260.53 1297.71 1298.53 1304.58 1314.99 1315.31  
1315.85 1329.47 1333.18 1341.04 1346.97 1347.91

1353.08 1360.46 1362.15 1363.37 1364.56 1365.73  
1366.10 1367.07 1382.20 1384.10 1385.79 1388.85  
1392.28 1395.01 1429.90 1469.66 1478.89 1491.53  
1492.18 1495.30 1496.14 1496.59 1497.79 1508.15  
1508.21 1508.35 1509.53 1518.01 1518.48 1523.59  
1539.86 1540.07 1540.32 1540.44 1541.87 1616.86  
1636.57 1637.22 1637.92 1639.23 1640.57 1648.50  
1658.63 1659.10 1659.17 1660.29 1661.48 1667.03  
3024.17 3026.66 3028.60 3043.45 3050.93 3052.13  
3054.60 3057.29 3061.28 3063.64 3066.28 3066.92  
3069.51 3097.43 3098.05 3107.25 3115.04 3117.03  
3119.70 3125.97 3144.16 3144.90 3161.22 3162.61  
3167.05 3175.62 3178.78 3179.10 3180.52 3184.10  
3184.96 3187.73 3189.46 3192.19 3194.11 3195.34  
3196.04 3196.31 3198.84 3202.33 3205.10 3205.54  
3208.10 3209.70 3209.93 3211.72 3212.07 3214.13  
3216.47 3224.41 3229.90

V<sub>PC</sub>

5.16 15.40 21.50 26.60 27.81 28.77  
32.15 38.02 39.33 44.39 46.20 49.58  
52.18 53.48 58.28 58.54 65.87 66.77  
67.71 76.15 78.27 79.66 83.79 86.24  
90.94 94.23 98.23 100.22 109.68 116.90  
120.63 125.82 128.69 131.33 137.65 147.15  
148.92 153.15 157.97 167.33 170.03 185.85  
191.41 195.90 205.98 212.36 218.27 225.50  
228.19 233.06 238.04 242.42 242.55 245.69  
251.50 259.83 266.76 269.08 278.39 282.77  
296.35 305.88 309.49 320.44 328.48 335.39  
346.41 375.10 384.31 393.81 414.84 416.93  
417.65 419.02 420.25 423.06 428.12 439.71  
467.28 470.62 477.74 495.82 496.33 500.80  
502.39 505.62 513.19 517.38 522.40 529.44  
529.77 552.20 553.07 569.73 574.25 583.56  
599.65 601.59 604.52 610.49 612.42 617.27  
624.71 629.53 633.74 634.10 634.49 635.01  
639.76 650.60 651.99 665.34 669.77 681.00  
697.97 713.63 713.81 714.63 715.03 720.57  
750.74 756.71 771.43 773.41 779.15 783.41  
784.90 786.56 788.59 799.66 802.35 816.43  
821.11 830.05 836.50 840.78 844.74 851.44  
856.04 861.85 865.74 867.80 869.87 870.55  
886.48 887.64 890.71 892.99 897.18 907.12  
920.25 921.68 923.32 926.69 931.89 933.65  
934.33 946.07 959.79 960.05 964.67 968.73  
971.71 974.01 975.31 977.99 983.36 994.11  
997.06 998.06 998.35 1000.26 1001.37 1002.23  
1008.49 1012.25 1012.82 1014.61 1015.84 1016.48  
1016.64 1019.50 1020.84 1027.57 1038.46 1040.95  
1044.17 1055.11 1055.56 1059.03 1059.84 1061.49  
1063.71 1065.10 1066.82 1068.03 1069.79 1070.04  
1071.07 1087.94 1107.60 1108.95 1111.88 1119.65  
1122.44 1123.82 1125.44 1128.69 1128.92 1155.72  
1159.16 1177.94 1184.64 1185.36 1193.02 1195.01  
1195.57 1195.65 1195.99 1198.19 1201.39 1215.37  
1215.51 1216.10 1219.56 1221.54 1222.91 1225.08  
1225.38 1226.10 1228.86 1231.10 1235.69 1239.34  
1248.89 1251.38 1254.73 1257.12 1268.41 1286.14  
1293.74 1298.60 1311.98 1315.88 1319.20 1319.50  
1320.50 1327.82 1335.00 1340.22 1341.09 1345.33  
1345.43 1357.20 1361.63 1361.87 1365.23 1365.98  
1366.21 1368.35 1372.60 1375.47 1385.26 1398.28  
1399.63 1401.16 1406.47 1412.70 1420.41 1423.24  
1425.67 1428.30 1454.32 1469.21 1477.84 1486.36  
1489.84 1492.38 1493.20 1493.50 1495.20 1495.48  
1498.75 1498.96 1499.73 1506.37 1507.70 1507.99  
1510.01 1510.35 1518.62 1519.21 1520.43 1521.27  
1531.36 1538.26 1539.02 1539.29 1542.35 1542.93  
1622.37 1623.78 1628.09 1633.41 1636.26 1637.37  
1639.75 1648.21 1654.04 1657.66 1658.21 1659.51  
1659.84 1661.89 1664.35 1665.34 3017.28 3022.22  
3029.75 3035.47 3038.55 3038.86 3041.49 3043.56  
3045.91 3047.49 3048.39 3057.92 3059.63 3065.09

3071.84 3076.02 3085.15 3085.99 3091.90 3096.19  
 3099.39 3100.56 3105.79 3106.99 3108.02 3113.20  
 3114.04 3118.56 3123.58 3140.45 3141.94 3148.04  
 3151.57 3151.97 3153.63 3168.63 3168.75 3169.62  
 3171.71 3173.25 3175.73 3177.95 3178.27 3181.10  
 3184.64 3184.70 3188.35 3188.37 3188.61 3189.45  
 3190.45 3191.24 3197.76 3198.00 3201.58 3203.82  
 3204.77 3206.34 3208.44 3212.86 3218.56 3230.31

**VI<sub>pc</sub>-TS**

-1051.09 13.17 18.16 19.77 26.96 32.60  
 35.17 38.46 40.29 43.56 44.16 47.16  
 49.60 53.98 56.86 59.07 62.44 63.50  
 69.62 72.49 75.21 82.13 86.04 92.82  
 96.82 98.33 101.58 109.98 112.30 117.55  
 122.81 127.59 132.22 140.11 142.44 150.91  
 157.92 160.50 176.48 186.33 187.36 190.27  
 200.74 203.50 207.11 220.93 225.67 228.39  
 231.15 234.38 238.14 239.22 245.42 248.45  
 252.45 270.54 273.98 277.28 281.50 285.99  
 290.52 307.05 309.82 314.52 334.45 339.24  
 353.50 361.30 377.29 391.14 403.08 417.97  
 418.33 420.14 420.64 429.67 435.62 442.10  
 444.97 480.51 485.63 490.09 491.22 494.22  
 498.88 503.79 509.15 511.65 518.77 522.88  
 535.06 540.48 544.15 547.55 568.89 592.45  
 599.34 604.97 605.76 609.41 613.57 619.63  
 626.31 629.73 630.18 632.82 634.19 634.62  
 639.53 641.07 648.57 664.20 665.49 678.67  
 680.27 696.43 716.66 718.58 720.44 721.50  
 728.89 736.14 752.98 774.11 774.66 777.38  
 779.36 781.88 783.45 785.25 798.99 802.53  
 809.85 817.79 821.46 838.57 845.76 848.13  
 854.59 859.32 862.10 867.30 869.96 874.11  
 878.19 881.24 896.60 899.85 903.26 904.60  
 920.18 923.17 927.86 931.99 934.53 935.76  
 937.41 940.20 942.37 948.24 953.28 961.22  
 975.02 978.23 978.89 979.08 979.23 984.21  
 986.29 999.11 1002.49 1007.11 1007.61 1009.46  
 1010.07 1012.32 1014.36 1015.32 1016.28 1016.80  
 1019.37 1022.47 1023.83 1037.03 1038.65 1046.38  
 1049.28 1051.24 1057.80 1059.31 1060.32 1060.64  
 1061.91 1062.57 1063.15 1063.44 1070.00 1071.11  
 1071.94 1080.06 1109.78 1109.87 1110.93 1119.78  
 1123.78 1125.64 1126.63 1137.18 1144.21 1152.94  
 1158.79 1182.05 1184.78 1191.40 1194.85 1194.98  
 1195.64 1196.77 1197.71 1198.03 1209.87 1215.32  
 1215.92 1216.51 1222.93 1225.28 1225.69 1227.30  
 1227.50 1228.79 1232.39 1234.27 1240.29 1251.02  
 1253.34 1254.83 1262.24 1273.95 1285.06 1295.69  
 1301.46 1302.15 1303.32 1307.57 1311.87 1313.99  
 1320.54 1322.23 1328.37 1340.53 1343.69 1347.42  
 1349.66 1361.20 1364.35 1364.56 1365.95 1368.88  
 1369.17 1370.97 1375.30 1377.94 1384.27 1392.87  
 1397.51 1398.91 1404.50 1415.47 1424.67 1426.31  
 1428.97 1431.29 1449.02 1451.52 1467.27 1478.79  
 1480.58 1493.19 1493.57 1494.01 1494.27 1494.87  
 1497.90 1498.60 1499.79 1505.84 1506.61 1507.73  
 1509.14 1511.46 1513.16 1516.15 1516.88 1517.49  
 1517.95 1523.13 1535.17 1541.29 1541.57 1542.93  
 1543.87 1547.65 1618.82 1623.58 1636.17 1636.93  
 1637.61 1639.90 1640.10 1657.20 1659.25 1661.01  
 1661.37 1662.35 1662.75 1663.56 1664.27 3016.29  
 3029.26 3032.00 3034.25 3037.21 3037.98 3040.08  
 3044.76 3050.26 3051.43 3054.18 3054.53 3054.57  
 3062.37 3079.35 3081.12 3089.30 3089.84 3092.24  
 3101.33 3101.83 3106.53 3117.26 3117.32 3121.63  
 3124.86 3140.43 3147.81 3153.64 3160.56 3163.90  
 3164.17 3165.19 3165.33 3167.64 3169.78 3171.32  
 3172.97 3173.27 3178.47 3183.07 3184.71 3184.94  
 3185.60 3188.31 3191.70 3193.25 3195.94 3198.74  
 3198.84 3199.21 3200.85 3204.70 3207.97 3209.87  
 3210.76 3211.70 3221.08 3222.21 3227.70 3261.94

**VII<sub>pc</sub>**

8.83 14.81 16.97 21.17 23.95 26.86  
 29.67 32.69 35.86 39.87 45.27 47.27  
 49.90 51.59 53.33 60.17 63.13 67.88  
 70.55 76.26 83.12 85.83 88.42 89.02  
 97.88 101.53 106.17 109.39 111.04 117.03  
 122.11 122.98 128.85 135.27 145.06 148.08  
 152.06 159.82 167.02 182.50 191.56 193.41  
 200.65 214.16 219.27 226.78 229.43 232.11  
 233.16 236.51 239.78 245.77 248.78 250.51  
 252.98 263.13 271.23 273.50 275.81 290.24  
 296.97 299.40 316.97 325.93 333.90 349.46  
 355.40 373.36 374.26 393.24 413.24 415.97  
 420.96 423.05 426.17 432.01 434.09 450.85  
 454.53 479.25 491.27 494.18 498.61 500.37  
 505.15 512.85 514.55 518.50 532.72 538.99  
 540.87 541.09 564.84 573.15 593.88 597.17  
 599.98 607.74 608.34 610.88 614.51 627.39  
 630.34 631.01 633.35 634.39 634.81 635.02  
 641.75 650.15 662.73 663.84 676.13 683.96  
 702.16 711.94 714.10 719.30 720.65 722.06  
 722.91 736.32 759.50 760.02 771.54 775.21  
 776.74 778.98 783.40 785.00 786.18 800.86  
 802.14 811.84 813.97 839.38 847.33 849.52  
 853.86 855.63 859.25 860.76 870.63 875.38  
 876.22 877.13 887.24 895.25 901.67 903.79  
 920.98 924.25 926.15 930.83 931.76 932.73  
 935.24 935.52 939.17 947.46 960.60 964.70  
 970.83 975.41 975.79 979.84 981.20 983.31  
 986.33 997.96 1001.08 1002.67 1005.43 1010.17  
 1013.05 1013.42 1014.40 1015.58 1016.10 1017.57  
 1021.79 1022.60 1023.27 1027.68 1037.27 1041.48  
 1044.11 1050.41 1057.37 1058.10 1058.12 1059.70  
 1060.90 1062.96 1064.13 1065.09 1067.97 1070.06  
 1071.99 1072.20 1106.05 1109.32 1111.55 1118.22  
 1118.38 1124.30 1125.74 1134.29 1147.66 1150.90  
 1157.16 1179.82 1181.53 1189.47 1193.80 1194.34  
 1194.83 1196.55 1197.46 1197.89 1200.02 1210.90  
 1214.58 1219.71 1220.44 1223.35 1227.15 1227.62  
 1229.23 1233.53 1234.54 1239.80 1248.32 1252.77  
 1253.58 1256.50 1261.13 1264.21 1290.06 1294.39  
 1297.33 1300.48 1302.50 1313.16 1313.43 1313.69  
 1322.72 1325.00 1329.66 1334.81 1345.75 1348.16  
 1355.02 1356.99 1358.49 1360.94 1364.80 1365.90  
 1368.01 1370.30 1373.51 1374.66 1386.63 1394.28  
 1397.94 1399.29 1405.04 1410.86 1426.84 1426.92  
 1430.50 1432.91 1451.83 1464.39 1476.75 1477.24  
 1484.13 1491.64 1492.88 1493.88 1495.20 1496.06  
 1497.91 1501.04 1502.95 1506.72 1507.30 1507.64  
 1508.44 1510.96 1515.35 1516.78 1517.36 1518.02  
 1524.47 1538.84 1541.51 1541.80 1541.93 1548.11  
 1548.67 1601.65 1616.92 1634.05 1637.19 1637.39  
 1639.03 1640.07 1656.12 1656.22 1656.77 1660.46  
 1662.13 1662.99 1663.32 1730.02 2986.81 3029.77  
 3031.38 3032.05 3035.42 3037.27 3040.20 3041.88  
 3044.93 3046.62 3049.57 3056.94 3058.35 3062.09  
 3081.28 3081.35 3087.01 3089.26 3094.09 3100.93  
 3103.98 3109.08 3112.39 3114.58 3116.60 3117.83  
 3121.98 3124.58 3144.32 3153.71 3158.85 3160.06  
 3160.63 3162.68 3165.62 3167.18 3169.86 3170.52  
 3173.63 3176.21 3178.13 3179.76 3181.72 3181.98  
 3184.88 3185.85 3188.63 3189.34 3190.07 3194.41  
 3196.36 3197.80 3198.33 3203.92 3205.09 3206.40  
 3208.68 3211.01 3217.43 3231.99 3268.22 3324.49

**VII<sub>pc</sub>-TS**

-1159.28 8.82 17.38 21.06 24.50 27.47  
 31.74 35.04 38.60 42.02 42.91 46.41  
 50.28 53.04 54.93 59.31 62.25 63.31  
 66.46 70.90 72.65 76.77 77.45 83.17  
 87.40 89.25 95.73 101.76 103.68 117.27  
 119.79 129.61 131.23 140.17 144.06 152.14  
 154.70 161.26 176.45 179.12 180.50 190.10

200.75 208.40 211.89 216.82 228.00 231.07  
 233.38 236.60 239.56 243.13 247.02 248.32  
 255.85 260.16 269.63 274.29 286.30 290.92  
 293.37 309.77 319.49 334.28 335.47 353.41  
 357.91 364.91 370.29 379.97 398.28 415.11  
 415.98 416.69 421.96 424.06 428.08 432.22  
 453.16 484.68 490.26 497.41 499.57 499.94  
 506.84 514.57 516.35 527.20 534.85 539.72  
 543.53 544.85 545.22 563.41 566.21 595.44  
 598.18 599.10 603.26 608.81 618.81 621.77  
 625.91 631.55 632.02 632.45 633.80 634.41  
 640.03 649.18 656.77 679.24 683.92 697.55  
 704.05 706.79 717.14 718.85 719.62 720.93  
 722.55 723.06 743.73 768.00 770.34 772.31  
 773.24 784.23 786.52 787.24 793.38 802.97  
 810.10 818.41 829.72 837.42 843.79 850.31  
 855.03 857.60 858.92 869.00 872.44 874.11  
 874.54 876.99 893.07 897.50 898.07 901.52  
 903.24 914.64 922.47 922.75 926.94 928.94  
 934.34 935.47 939.69 941.03 958.18 972.96  
 973.05 974.00 975.85 978.45 981.91 982.41  
 984.22 989.68 1000.71 1001.39 1003.34 1004.48  
 1009.96 1013.59 1014.54 1015.46 1016.08 1016.34  
 1016.79 1017.61 1020.32 1030.75 1040.44 1041.24  
 1044.97 1045.72 1056.67 1057.91 1058.12 1059.51  
 1059.97 1060.68 1062.69 1066.16 1067.08 1067.67  
 1069.31 1075.41 1106.54 1111.50 1112.62 1118.11  
 1119.92 1122.17 1125.63 1125.82 1145.19 1149.51  
 1152.74 1163.59 1170.24 1183.72 1187.93 1188.66  
 1194.33 1195.42 1196.84 1197.05 1198.34 1210.51  
 1212.03 1217.60 1219.93 1221.36 1222.70 1223.57  
 1224.64 1229.63 1231.35 1237.77 1239.55 1248.01  
 1252.28 1253.44 1253.87 1282.39 1286.72 1289.49  
 1291.99 1295.94 1301.84 1313.24 1313.92 1314.16  
 1316.75 1320.89 1330.47 1332.61 1345.64 1346.99  
 1355.13 1357.33 1359.14 1363.76 1364.19 1364.81  
 1368.12 1370.88 1371.62 1372.67 1374.63 1384.67  
 1396.91 1397.20 1399.06 1413.11 1424.97 1425.24  
 1426.30 1430.59 1449.21 1465.84 1475.13 1475.65  
 1487.44 1492.05 1492.65 1493.05 1493.75 1494.07  
 1494.65 1497.34 1500.61 1502.99 1506.57 1507.33  
 1507.45 1509.80 1510.41 1512.90 1516.95 1517.37  
 1520.96 1537.12 1538.54 1540.11 1540.42 1547.85  
 1598.27 1605.19 1613.20 1621.78 1636.30 1636.51  
 1637.45 1638.21 1638.30 1658.12 1659.25 1659.87  
 1660.72 1660.82 1661.09 1662.23 1685.41 3004.73  
 3027.01 3028.11 3031.60 3037.91 3041.38 3043.65  
 3049.51 3051.07 3051.14 3052.03 3055.81 3059.00  
 3061.51 3064.75 3081.17 3083.06 3091.36 3095.28  
 3102.84 3104.02 3118.43 3119.09 3120.89 3121.00  
 3121.98 3127.78 3149.42 3153.42 3160.77 3162.67  
 3163.83 3163.89 3164.66 3167.48 3170.27 3170.81  
 3172.37 3173.94 3180.97 3181.41 3182.30 3182.67  
 3183.34 3184.77 3186.57 3187.43 3191.99 3195.47  
 3196.61 3197.19 3197.26 3198.11 3198.21 3204.66  
 3204.96 3212.56 3219.16 3232.43 3237.87 3277.51

VIII<sub>PC</sub>

7.51 15.88 21.62 23.33 26.78 31.52  
 34.14 36.69 37.42 41.64 45.09 50.61  
 52.49 56.16 58.01 63.23 67.92 69.74  
 71.82 74.50 75.31 85.22 88.12 91.25  
 97.55 98.46 109.43 111.46 115.31 119.63  
 120.84 127.43 133.75 139.47 141.22 144.65  
 155.07 160.01 169.66 180.48 182.86 202.61  
 206.64 208.03 213.66 225.82 231.00 232.61  
 236.43 241.53 242.83 250.73 251.89 253.35  
 264.27 271.12 273.24 283.10 289.20 291.26  
 294.40 313.39 330.07 334.24 345.65 355.54  
 365.46 370.88 383.10 396.95 417.28 418.05  
 421.45 421.81 422.20 423.83 430.73 445.28  
 466.71 472.79 481.04 488.77 498.19 504.56  
 508.11 513.98 529.45 531.26 536.53 536.69  
 545.02 548.29 557.05 574.06 591.20 595.19

596.67 601.97 610.20 617.64 620.69 625.44  
 629.58 631.42 632.60 633.98 634.22 634.89  
 641.07 649.52 650.32 679.33 683.82 692.09  
 706.27 714.84 715.91 717.18 718.51 720.58  
 725.69 731.91 747.05 764.47 773.76 778.19  
 780.33 783.06 785.08 789.19 807.18 814.22  
 818.69 823.28 836.25 843.86 850.89 854.89  
 859.35 863.39 864.51 865.44 867.28 869.59  
 873.31 877.28 877.59 893.42 895.75 896.45  
 914.65 921.83 926.21 926.97 930.64 935.84  
 938.76 941.60 944.27 959.11 973.71 974.28  
 975.76 977.15 978.18 983.27 983.44 985.19  
 991.99 999.94 1000.87 1002.19 1002.56 1006.32  
 1009.03 1013.05 1014.98 1015.59 1016.04 1017.46  
 1019.07 1019.75 1022.91 1028.29 1038.74 1039.09  
 1041.41 1046.77 1056.91 1057.94 1058.24 1059.56  
 1060.42 1061.58 1062.96 1065.80 1067.98 1068.75  
 1069.55 1076.39 1102.66 1109.84 1111.34 1119.03  
 1119.51 1122.71 1127.83 1130.40 1145.17 1152.52  
 1155.14 1164.29 1175.48 1185.75 1186.21 1190.99  
 1192.99 1193.62 1196.40 1196.79 1197.74 1208.74  
 1219.17 1219.21 1219.85 1222.90 1223.32 1223.94  
 1224.83 1226.60 1228.16 1237.88 1243.71 1249.64  
 1252.54 1253.74 1266.74 1284.40 1286.46 1288.51  
 1296.49 1304.72 1306.52 1313.60 1315.60 1318.59  
 1320.51 1322.32 1329.66 1332.99 1346.56 1347.11  
 1357.42 1359.29 1361.93 1362.63 1365.73 1367.19  
 1367.57 1369.57 1374.10 1390.13 1390.38 1398.67  
 1399.17 1402.25 1406.79 1424.91 1425.90 1426.44  
 1429.22 1450.18 1465.85 1469.92 1475.60 1478.12  
 1488.62 1491.03 1491.56 1492.71 1493.24 1495.41  
 1495.97 1496.46 1500.58 1502.73 1504.62 1506.23  
 1508.69 1510.84 1514.96 1516.48 1516.94 1521.60  
 1528.74 1535.07 1539.01 1540.21 1541.52 1546.96  
 1594.35 1606.30 1620.08 1633.86 1635.18 1636.96  
 1638.41 1639.19 1640.42 1657.76 1659.07 1661.57  
 1661.61 1662.11 1662.20 1670.12 2999.20 3028.22  
 3029.29 3034.29 3035.07 3040.02 3045.23 3047.42  
 3047.68 3048.09 3049.27 3051.72 3054.58 3056.42  
 3057.92 3060.24 3081.43 3088.66 3089.17 3100.96  
 3103.52 3109.63 3113.65 3116.94 3117.73 3120.43  
 3120.72 3127.89 3139.88 3141.94 3156.91 3159.02  
 3163.10 3164.18 3164.61 3169.91 3172.90 3173.93  
 3174.63 3177.98 3178.20 3181.10 3185.20 3185.25  
 3185.58 3185.59 3192.10 3193.45 3194.06 3195.07  
 3195.55 3196.57 3199.74 3202.80 3203.39 3203.58  
 3207.20 3220.67 3226.69 3261.44 3278.26 3287.42

IV<sub>P</sub>

11.47 22.87 29.54 30.88 33.38 39.70  
 43.71 49.80 52.52 55.61 59.28 67.45  
 71.16 77.57 82.81 86.77 89.41 91.00  
 95.38 104.88 106.98 115.35 118.12 119.49  
 127.10 134.90 141.32 147.95 156.71 163.36  
 181.94 183.71 195.37 201.95 210.46 215.49  
 225.13 231.00 231.86 236.24 263.99 264.73  
 270.82 280.44 287.01 293.30 297.17 329.12  
 343.85 350.48 367.59 373.49 397.85 415.64  
 417.66 418.32 420.96 421.27 425.64 430.97  
 442.69 455.85 458.80 490.15 492.74 500.90  
 507.30 508.95 515.66 519.62 540.26 550.91  
 559.56 569.07 602.40 603.12 608.58 617.63  
 624.66 625.10 629.91 631.12 633.30 634.80  
 635.29 642.94 649.18 673.30 682.38 688.69  
 693.95 706.92 715.29 719.39 721.25 722.40  
 744.22 767.53 773.85 776.24 777.00 784.57  
 786.90 789.45 792.53 796.37 818.12 829.85  
 841.08 848.07 852.27 855.94 860.33 864.10  
 868.83 869.52 870.04 874.49 888.90 890.99  
 894.41 897.68 906.10 925.58 928.24 929.09  
 935.03 936.30 943.04 946.62 961.18 970.36  
 978.00 982.40 984.25 987.23 987.69 994.64  
 1003.97 1006.21 1007.57 1010.07 1010.32 1011.34  
 1012.47 1013.52 1013.83 1015.04 1015.42 1017.07

|         |         |         |         |         |         |
|---------|---------|---------|---------|---------|---------|
| 1017.49 | 1019.30 | 1021.50 | 1022.75 | 1032.78 | 1038.05 |
| 1039.45 | 1053.39 | 1057.31 | 1058.68 | 1059.55 | 1062.55 |
| 1066.27 | 1068.73 | 1098.61 | 1111.86 | 1112.02 | 1119.09 |
| 1126.72 | 1133.18 | 1141.29 | 1149.82 | 1153.73 | 1154.93 |
| 1166.53 | 1179.48 | 1183.34 | 1192.45 | 1193.91 | 1197.99 |
| 1199.60 | 1200.42 | 1200.99 | 1205.21 | 1213.22 | 1216.61 |
| 1220.46 | 1221.98 | 1225.50 | 1226.47 | 1228.76 | 1229.46 |
| 1230.39 | 1232.78 | 1246.45 | 1250.86 | 1256.52 | 1258.52 |
| 1262.15 | 1273.75 | 1292.58 | 1298.83 | 1308.07 | 1310.01 |
| 1314.72 | 1318.02 | 1327.65 | 1344.26 | 1344.78 | 1353.30 |
| 1355.69 | 1359.96 | 1361.37 | 1365.27 | 1366.09 | 1367.18 |
| 1368.07 | 1375.15 | 1379.31 | 1384.00 | 1391.68 | 1394.88 |
| 1400.69 | 1402.71 | 1406.99 | 1423.64 | 1467.22 | 1476.61 |
| 1479.07 | 1482.33 | 1486.40 | 1489.03 | 1491.69 | 1493.89 |
| 1494.23 | 1500.92 | 1507.08 | 1510.85 | 1515.83 | 1518.61 |
| 1534.32 | 1534.80 | 1539.90 | 1541.44 | 1542.07 | 1542.47 |
| 1570.87 | 1607.11 | 1636.35 | 1636.64 | 1637.02 | 1638.03 |
| 1641.29 | 1654.71 | 1656.77 | 1658.76 | 1660.01 | 1660.43 |
| 3011.90 | 3023.41 | 3034.02 | 3044.15 | 3047.51 | 3049.44 |
| 3050.64 | 3054.20 | 3059.94 | 3060.66 | 3077.15 | 3099.89 |
| 3100.93 | 3101.96 | 3107.20 | 3113.28 | 3115.04 | 3142.15 |
| 3166.05 | 3169.43 | 3169.47 | 3172.43 | 3172.62 | 3180.21 |
| 3181.37 | 3183.51 | 3185.11 | 3185.74 | 3186.22 | 3190.55 |
| 3191.02 | 3192.92 | 3194.59 | 3196.46 | 3196.85 | 3197.10 |
| 3200.90 | 3201.08 | 3202.44 | 3203.85 | 3206.23 | 3206.51 |
| 3211.86 | 3212.11 | 3212.35 | 3212.69 | 3215.95 | 3218.38 |
| 3241.04 | 3250.33 | 3276.15 |         |         |         |

III<sub>PN</sub>-TS'

|         |         |         |         |         |         |
|---------|---------|---------|---------|---------|---------|
| -65.29  | 20.74   | 23.10   | 36.00   | 38.50   | 39.25   |
| 41.71   | 47.46   | 53.71   | 56.26   | 57.34   | 62.67   |
| 68.03   | 74.93   | 79.62   | 81.18   | 88.94   | 92.97   |
| 94.58   | 99.32   | 106.98  | 110.12  | 116.27  | 124.40  |
| 129.53  | 132.76  | 138.00  | 144.58  | 158.60  | 166.89  |
| 174.70  | 179.68  | 194.37  | 201.84  | 207.30  | 216.68  |
| 221.67  | 229.93  | 235.78  | 243.85  | 254.86  | 268.60  |
| 272.51  | 275.23  | 276.86  | 283.81  | 296.61  | 317.30  |
| 340.64  | 346.88  | 363.04  | 369.38  | 391.02  | 412.60  |
| 413.89  | 416.05  | 418.01  | 425.14  | 428.04  | 434.03  |
| 438.73  | 446.39  | 468.91  | 492.22  | 494.57  | 507.46  |
| 508.92  | 511.97  | 519.81  | 531.05  | 539.56  | 543.27  |
| 566.44  | 568.79  | 595.47  | 605.87  | 607.95  | 614.98  |
| 621.30  | 622.18  | 624.87  | 629.41  | 632.72  | 634.50  |
| 635.49  | 640.57  | 648.44  | 681.26  | 685.07  | 691.93  |
| 695.16  | 697.14  | 717.16  | 717.95  | 724.21  | 727.24  |
| 741.80  | 763.30  | 773.36  | 777.22  | 780.66  | 784.77  |
| 786.73  | 786.79  | 787.83  | 792.67  | 815.49  | 840.15  |
| 846.33  | 850.40  | 852.87  | 857.54  | 861.06  | 862.66  |
| 864.63  | 871.45  | 871.64  | 879.65  | 880.95  | 889.16  |
| 891.15  | 895.98  | 902.94  | 918.64  | 923.46  | 929.97  |
| 933.55  | 939.76  | 940.67  | 947.19  | 948.64  | 955.48  |
| 979.03  | 981.63  | 985.36  | 987.59  | 988.05  | 993.06  |
| 995.94  | 999.95  | 1005.22 | 1008.68 | 1010.90 | 1011.94 |
| 1012.79 | 1013.46 | 1014.20 | 1014.56 | 1015.79 | 1016.55 |
| 1019.07 | 1020.24 | 1022.32 | 1025.89 | 1026.34 | 1034.46 |
| 1042.79 | 1055.29 | 1055.80 | 1057.23 | 1059.67 | 1060.40 |
| 1065.52 | 1067.08 | 1100.44 | 1108.80 | 1109.93 | 1112.75 |
| 1117.80 | 1125.83 | 1141.17 | 1149.32 | 1153.32 | 1157.75 |
| 1158.59 | 1177.66 | 1180.91 | 1185.78 | 1199.03 | 1199.23 |
| 1199.78 | 1200.08 | 1205.35 | 1211.89 | 1217.02 | 1218.26 |
| 1221.98 | 1222.58 | 1224.54 | 1225.40 | 1226.47 | 1226.58 |
| 1229.23 | 1230.08 | 1246.16 | 1247.43 | 1253.22 | 1263.75 |
| 1273.46 | 1287.82 | 1295.98 | 1299.30 | 1306.48 | 1307.50 |
| 1309.10 | 1317.94 | 1337.43 | 1344.92 | 1347.01 | 1351.32 |
| 1353.88 | 1356.04 | 1360.88 | 1362.44 | 1363.50 | 1365.84 |
| 1372.48 | 1379.11 | 1382.18 | 1383.68 | 1387.10 | 1392.08 |
| 1401.82 | 1402.01 | 1426.10 | 1431.10 | 1464.14 | 1477.23 |
| 1479.85 | 1486.14 | 1490.39 | 1493.94 | 1494.94 | 1495.91 |
| 1498.05 | 1505.22 | 1507.99 | 1508.48 | 1515.09 | 1518.88 |
| 1526.41 | 1531.87 | 1537.83 | 1539.65 | 1540.62 | 1541.49 |
| 1576.16 | 1602.93 | 1630.39 | 1634.36 | 1636.72 | 1637.56 |
| 1638.34 | 1646.66 | 1653.06 | 1657.11 | 1658.95 | 1660.07 |
| 3010.07 | 3030.09 | 3032.56 | 3033.08 | 3033.92 | 3042.31 |
| 3045.85 | 3046.03 | 3051.37 | 3053.44 | 3066.46 | 3076.23 |

|         |         |         |         |         |         |
|---------|---------|---------|---------|---------|---------|
| 3092.19 | 3101.00 | 3103.53 | 3105.30 | 3109.68 | 3124.79 |
| 3164.74 | 3165.95 | 3166.22 | 3167.26 | 3169.60 | 3171.89 |
| 3174.73 | 3179.01 | 3180.72 | 3182.33 | 3183.49 | 3184.11 |
| 3186.88 | 3188.08 | 3192.23 | 3193.29 | 3193.67 | 3194.09 |
| 3197.80 | 3200.97 | 3202.36 | 3203.37 | 3203.76 | 3204.45 |
| 3210.09 | 3210.58 | 3211.84 | 3215.02 | 3220.72 | 3231.56 |
| 3231.89 | 3243.33 | 3264.50 |         |         |         |

III<sub>PC</sub>-TS'

|         |         |         |         |         |         |
|---------|---------|---------|---------|---------|---------|
| -28.41  | 10.21   | 23.73   | 26.05   | 29.07   | 35.41   |
| 40.94   | 45.00   | 45.53   | 51.87   | 57.31   | 59.89   |
| 66.25   | 74.91   | 76.78   | 80.54   | 85.34   | 88.13   |
| 91.44   | 93.88   | 108.14  | 109.18  | 114.97  | 120.55  |
| 126.90  | 134.30  | 137.46  | 143.61  | 160.69  | 162.37  |
| 170.60  | 177.65  | 190.79  | 195.54  | 209.13  | 218.52  |
| 221.36  | 231.43  | 234.18  | 241.67  | 252.03  | 261.87  |
| 270.16  | 276.13  | 286.14  | 289.96  | 295.73  | 327.96  |
| 343.17  | 350.64  | 364.67  | 371.25  | 393.96  | 413.08  |
| 415.89  | 417.55  | 420.57  | 422.48  | 423.67  | 431.78  |
| 437.80  | 445.31  | 461.56  | 491.21  | 492.98  | 500.70  |
| 507.36  | 510.78  | 512.98  | 519.56  | 541.56  | 550.72  |
| 560.46  | 574.10  | 599.48  | 608.48  | 614.20  | 617.99  |
| 623.94  | 624.46  | 626.92  | 630.85  | 633.78  | 634.54  |
| 636.08  | 642.53  | 648.29  | 677.20  | 680.13  | 688.67  |
| 691.37  | 704.72  | 714.87  | 719.89  | 720.23  | 721.62  |
| 760.92  | 775.99  | 776.33  | 777.51  | 778.39  | 785.04  |
| 786.78  | 788.41  | 791.83  | 795.27  | 819.42  | 838.98  |
| 842.47  | 846.08  | 852.51  | 856.99  | 858.24  | 860.73  |
| 863.27  | 868.24  | 868.93  | 878.96  | 885.82  | 887.01  |
| 894.42  | 901.84  | 906.26  | 924.30  | 924.94  | 927.97  |
| 932.51  | 936.01  | 940.40  | 942.14  | 959.66  | 967.33  |
| 977.18  | 980.87  | 982.89  | 986.39  | 987.06  | 991.50  |
| 1001.45 | 1005.60 | 1006.59 | 1007.85 | 1009.86 | 1011.19 |
| 1011.91 | 1012.20 | 1015.11 | 1015.57 | 1017.12 | 1017.30 |
| 1019.83 | 1021.66 | 1025.86 | 1027.46 | 1031.67 | 1034.67 |
| 1037.62 | 1052.95 | 1056.51 | 1058.35 | 1059.06 | 1061.11 |
| 1065.73 | 1067.01 | 1095.57 | 1110.49 | 1111.17 | 1118.90 |
| 1125.68 | 1133.60 | 1135.36 | 1149.08 | 1152.97 | 1155.01 |
| 1173.90 | 1182.16 | 1189.11 | 1194.24 | 1198.04 | 1199.30 |
| 1200.01 | 1200.72 | 1203.46 | 1205.64 | 1215.07 | 1217.19 |
| 1220.05 | 1223.04 | 1224.54 | 1225.44 | 1226.09 | 1227.80 |
| 1229.58 | 1242.48 | 1247.81 | 1254.32 | 1257.35 | 1258.37 |
| 1264.12 | 1280.43 | 1291.63 | 1301.11 | 1310.23 | 1311.53 |
| 1316.98 | 1320.03 | 1332.10 | 1344.16 | 1345.32 | 1352.91 |
| 1353.76 | 1360.66 | 1360.78 | 1361.92 | 1364.07 | 1365.45 |
| 1365.66 | 1375.95 | 1378.70 | 1379.55 | 1384.38 | 1389.52 |
| 1396.06 | 1405.74 | 1430.72 | 1441.28 | 1470.14 | 1479.56 |
| 1482.06 | 1482.19 | 1484.75 | 1488.61 | 1492.58 | 1493.00 |
| 1494.25 | 1501.28 | 1506.74 | 1510.95 | 1516.41 | 1517.66 |
| 1522.57 | 1532.58 | 1534.71 | 1540.71 | 1541.01 | 1541.09 |
| 1595.89 | 1605.18 | 1635.79 | 1636.30 | 1636.74 | 1637.56 |
| 1637.89 | 1654.40 | 1657.92 | 1658.64 | 1659.09 | 1660.47 |
| 3013.65 | 3026.81 | 3043.55 | 3046.79 | 3049.28 | 3053.29 |
| 3056.79 | 3058.11 | 3062.02 | 3064.22 | 3084.45 | 3098.63 |
| 3101.38 | 3101.89 | 3102.53 | 3107.49 | 3114.17 | 3152.36 |
| 3154.58 | 3165.41 | 3165.93 | 3169.35 | 3179.45 | 3179.50 |
| 3184.36 | 3184.96 | 3186.29 | 3187.24 | 3188.60 | 3189.19 |
| 3190.87 | 3192.05 | 3194.56 | 3194.67 | 3198.71 | 3198.93 |
| 3200.64 | 3201.00 | 3202.34 | 3203.35 | 3209.14 | 3210.32 |
| 3210.50 | 3211.71 | 3212.12 | 3213.17 | 3220.13 | 3230.94 |
| 3242.67 | 3258.60 | 3291.89 |         |         |         |

## VII. References and Notes

- (1) “Prudent Practices in the Laboratory [electronic resource]: Handling and Management of Chemical Hazards / Committee on Prudent Practices in the Laboratory: An Update.”; Board on Chemical Sciences and Technology, Division of Earth and Life Studies, National Research Council of the National Academies. Washington, D.C.: National Academies Press, 2011.
- (2) Vo, Q. V.; Trenerry, C.; Rochfort, S.; Wadeson, J.; Leyton, C.; Hughes, A., Synthesis and Anti-Inflammatory Activity of Indole Glucosinolates. *Bioorg. Med. Chem.* **2014**, *22*, 856–864.
- (3) Tomakinian, T.; Kouklovsky, C.; Vincent, G., Investigation of the Synthesis of Benzofuroindolines from N-Hydroxyindoles: An O-Arylation/[3,3]-Sigmatropic Rearrangement Sequence. *Synlett* **2015**, *26*, 1269–1275.
- (4) For using  $\text{Na}_2\text{WO}_4/\text{H}_2\text{O}_2$  for oxidation, see: Somei, M.; Kawasaki, T.; Shimizu, K.; Fukui, Y.; Ohta, T., The Chemistry of 1-Hydroxyindoles: Synthesis of Methyl 1-Hydroxyindole-3-Acetate,  $N_b$ -Acetyl-1-Hydroxytryptamine, (+)-and (S)-1-Hydroxytryptophan Derivatives. *Chem. Pharm. Bull.* **1991**, *39*, 1905–1907; Yamada, K.; Tanaka, Y.; Somei, M., Synthesis of  $N_b$ -Acyltryptamines and Their 1-Hydroxy-Tryptamine Derivatives as New  $\alpha_2$ -Blockers. *Heterocycles* **2009**, *79*, 635–645.
- (5) Molander, G. A.; Brown, A. R., Suzuki–Miyaura Cross-Coupling Reactions of Potassium Vinyltrifluoroborate with Aryl and Heteroaryl Electrophiles. *J. Org. Chem.* **2006**, *71*, 9681–9686.
- (6) Bartoli, G.; Bosco, M.; Carlone, A.; Dalpozzo, R.; Marcantoni, E.; Melchiorre, P.; Sambri, L., Reaction of Dicarbonates with Carboxylic Acids Catalyzed by Weak Lewis Acids: General Method for the Synthesis of Anhydrides and Esters. *Synthesis* **2007**, *22*, 3489–3496.
- (7) Wang, Y.-M.; Buchwald, S. L., Enantioselective CuH-Catalyzed Hydroallylation of Vinylarenes. *J. Am. Chem. Soc.* **2016**, *138*, 5024–5027.
- (8) Zhou, Y.; Engl, O. D.; Bandar, J. S.; Chant, E. D.; Buchwald, S. L., CuH-Catalyzed Asymmetric Hydroamidation of Vinylarenes. *Angew. Chem. Int. Ed.* **2018**, *57*, 6672–6675.
- (9) Friis, S. D.; Pirnot, M. T.; Dupuis, L. N.; Buchwald, S. L., A Dual Palladium and Copper Hydride Catalyzed Approach for Alkyl–Aryl Cross-Coupling of Aryl Halides and Olefins. *Angew. Chem., Int. Ed.* **2017**, *56*, 7242–7246.
- (10) Maltais, R.; Ayan, D.; Poirier, D., Crucial Role of 3-Bromoethyl in Removing the Estrogenic Activity of 17 $\beta$ -HSD1 Inhibitor 16 $\beta$ -(*m*-Carbamoylbenzyl)estradiol. *ACS Med. Chem. Lett.* **2011**, *2*, 678–681.

- (11) Niu, D.; Buchwald, S. L., Design of Modified Amine Transfer Reagents Allows the Synthesis of  $\alpha$ -Chiral Secondary Amines via CuH-Catalyzed Hydroamination. *J. Am. Chem. Soc.* **2015**, *137*, 9716–9721.
- (12) Parr, R. G.; Yang, W., Density Functional Theory of Atoms and Molecules (Oxford University Press, New York, 1989).
- (13) Bochevarov, A. D.; Harder, E.; Hughes, T. F.; Greenwood, J. R.; Braden, D. A.; Philipp, D. M.; Rinaldo, D.; Halls, M. D.; Zhang, J.; Friesner, R. A., Jaguar: A High-Performance Quantum Chemistry Software Program with Strengths in Life and Materials Sciences. *Int. J. Quantum Chem.* **2013**, *113*, 2110–2142.
- (14) Becke, A. D., A New Mixing of Hartree–Fock and Local Density–Functional Theories *J. Chem. Phys.* **1993**, *98*, 1372–1377.
- (15) Becke, A. D., Density-Functional Exchange-Energy Approximation with Correct Asymptotic Behavior *Phys. Rev. A* **1988**, *38*, 3098–3100.
- (16) Grimme, S., Semiempirical GGA-Type Density Functional Constructed with a Long-Range Dispersion Correction *J. Comput. Chem.* **2006**, *27*, 1787–1799.
- (17) Grimme, S.; Antony, J.; Ehrlich, S.; Krieg, H., A Consistent and Accurate ab initio Parametrization of Density Functional Dispersion Correction (DFT-D) for the 94 Elements H–Pu. *J. Chem. Phys.* **2010**, *132*, 154104–154119.
- (18) Ditchfield, R.; Hehre, W. J.; Pople, J. A., Self-Consistent Molecular-Orbital Methods. IX. An Extended Gaussian-Type Basis for Molecular-Orbital Studies of Organic Molecules. *J. Chem. Phys.* **1971**, *54*, 724–728.
- (19) Hay, P. J.; Wadt, W. R., *Ab initio* Effective Core Potentials for Molecular Calculations. Potentials for the Transition Metal Atoms Sc to Hg. *J. Chem. Phys.* **1985**, *82*, 270–283.
- (20) Hay, P. J.; Wadt, W. R., *Ab initio* Effective Core Potentials for Molecular Calculations. Potentials for Main Group Elements Na to Bi. *J. Chem. Phys.* **1985**, *82*, 284–298.
- (21) Hay, P. J.; Wadt, W. R., *Ab initio* Effective Core Potentials for Molecular Calculations. Potentials for K to Au Including the Outermost Core Orbitals. *J. Chem. Phys.* **1985**, *82*, 299–310.
- (22) Dunning, T. H. Jr., Gaussian Basis Sets for Use in Correlated Molecular Calculations. I. The Atoms Boron through Neon and Hydrogen. *J. Chem. Phys.* **1989**, *90*, 1007–1023.
- (23) Marten, B.; Kim, K.; Cortis, C.; Friesner, R. A.; Murphy, R. B.; Ringnalda, M. N.; Sitkoff, D.; Honig, B., New Model for Calculation of Solvation Free Energies: Correction of Self-Consistent Reaction Field Continuum Dielectric Theory for Short-range Hydrogen-Bonding Effects. *J. Phys. Chem.* **1996**, *100*, 11775–11788.



- (24) Edinger, S. R.; Cortis, C.; Shenkin, P. S.; Friesner, R. A., Solvation Free Energies of Peptides: Comparison of Approximate Continuum Solvation Models with Accurate Solution of the Poisson-Boltzmann Equation. *J. Phys. Chem. B* **1997**, *101*, 1190-1197.
- (25) Friedrichs, M.; Zhou, R. H.; Edinger, S. R.; Friesner, R. A., Poisson-Boltzmann Analytical Gradients for Molecular Modeling Calculations. *J. Phys. Chem. B* **1999**, *103*, 3057-3061.
